# Supplementary material for: Mass spectrometry of the white adipose metabolome in a hibernating mammal reveals seasonal changes in alternate fuels and carnitine derivatives
Source: PubMed Central journal article supplement (PMC10337995; doi:10.3389/fphys.2023.1214087), 2023-06-28

# Figure S2

## Supplementary Figure 2: Boxplot Representations of all Annotated Features from the Positive Ion Mode

Collated feature intensity box plots for all annotated features in the positive ion mode. Left panel: original feature intensities from peak intensity table (Supplemental Table S2, tab 1). Right panel: feature intensities after  $\log_{10}$  transformation and auto scaling (values mean-centered and divided by the standard deviation).

# 1-Methyl-1,3-dihydro-2H-benzimidazole-2-thione

Original Conc.

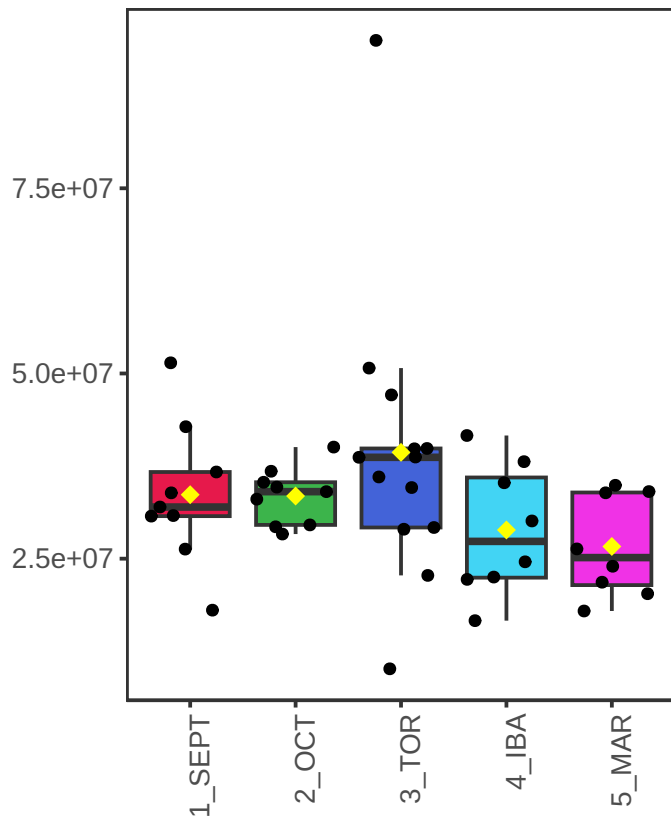

Normalized Conc.

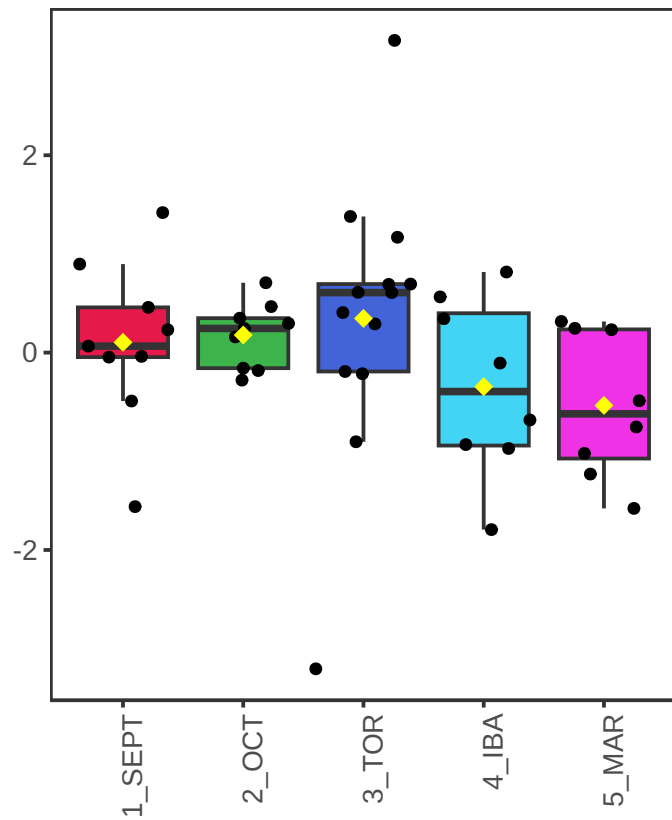

# 1-Methylhistidine

Original Conc.

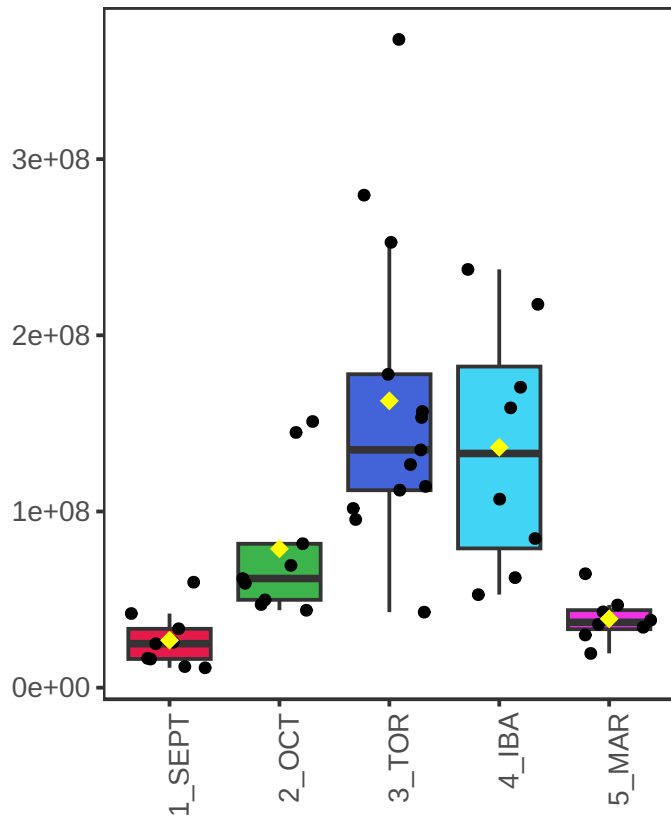

Normalized Conc.

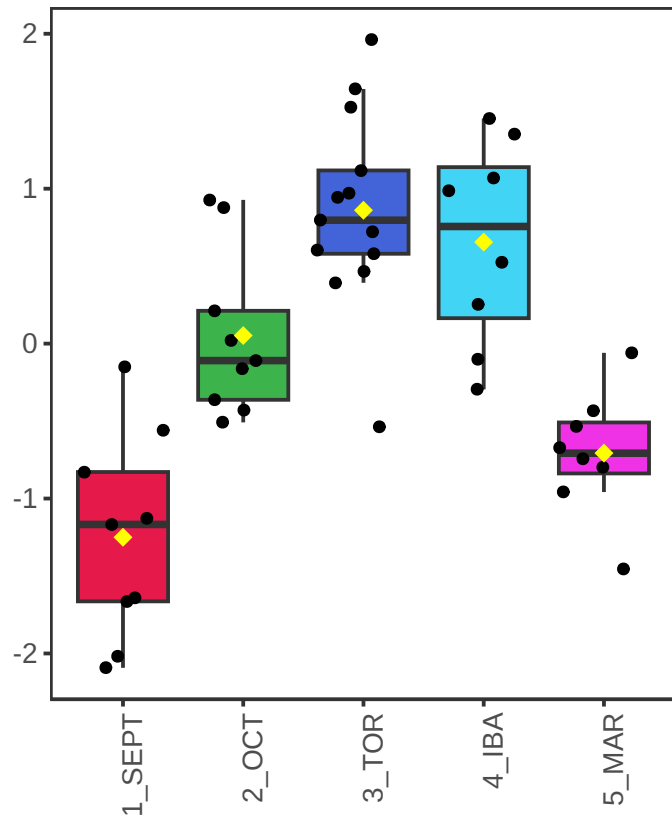

# 1-Methylimidazoleacetic acid

Original Conc.

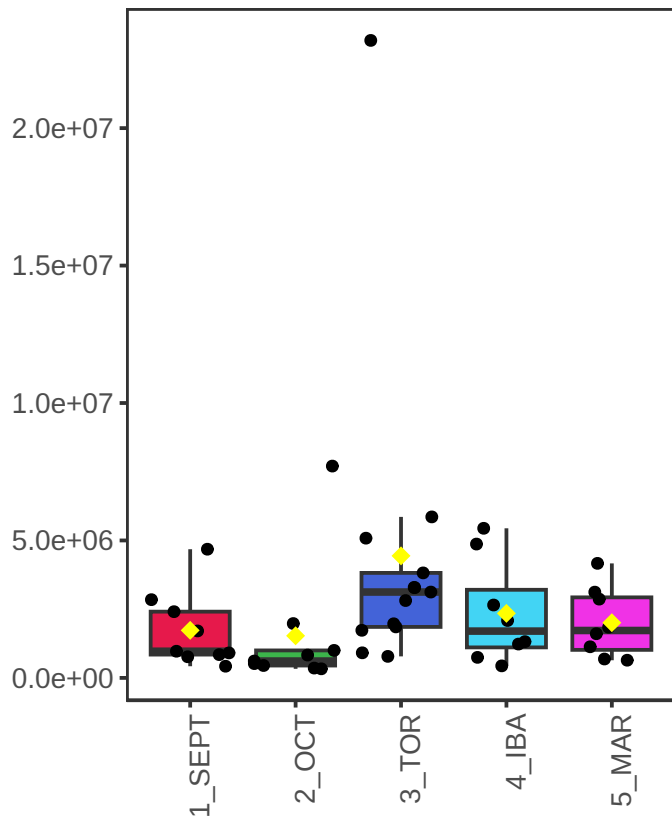

Normalized Conc.

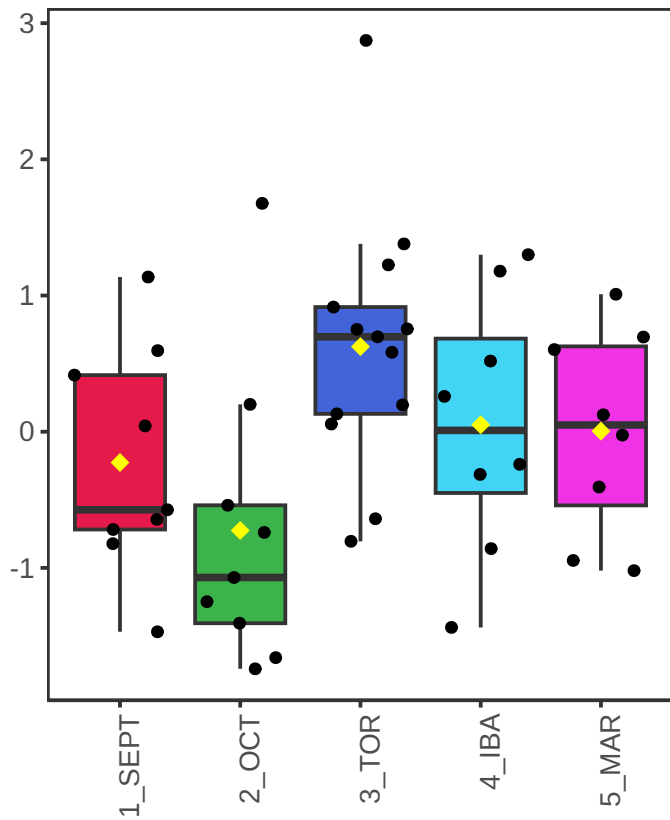

# 1-Palmitoyl-2-hydroxy-sn-glycero-3-PE

Original Conc.

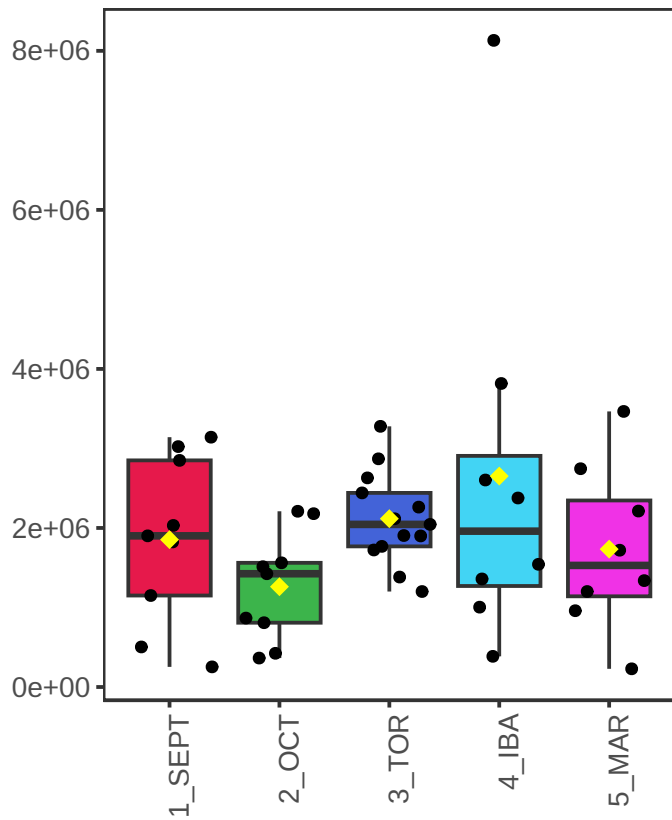

Normalized Conc.

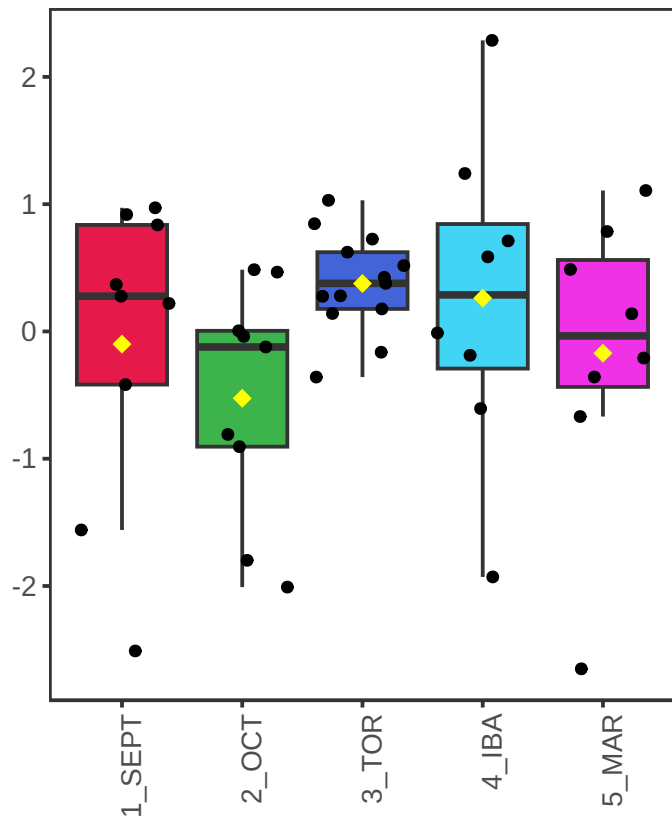

# 1-Piperidine

Original Conc.

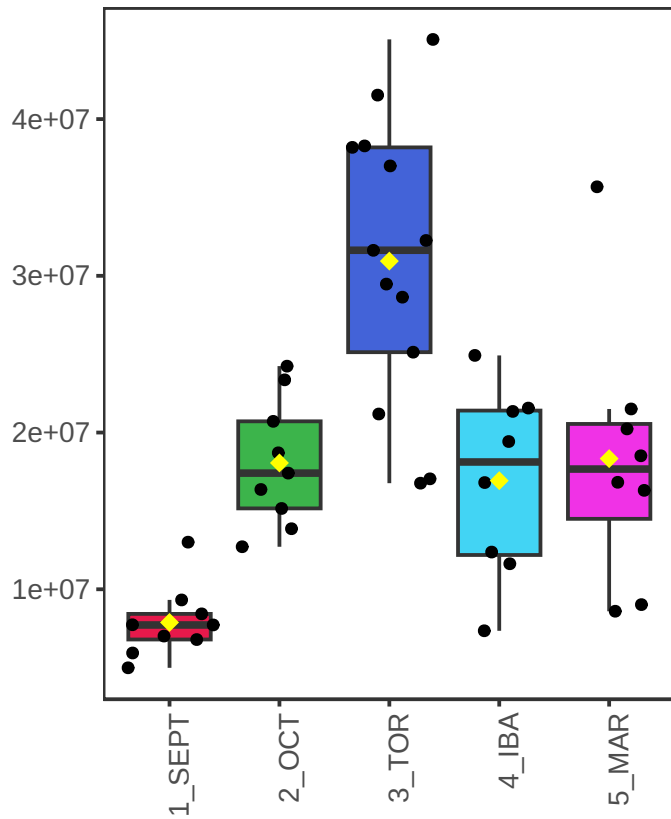

Normalized Conc.

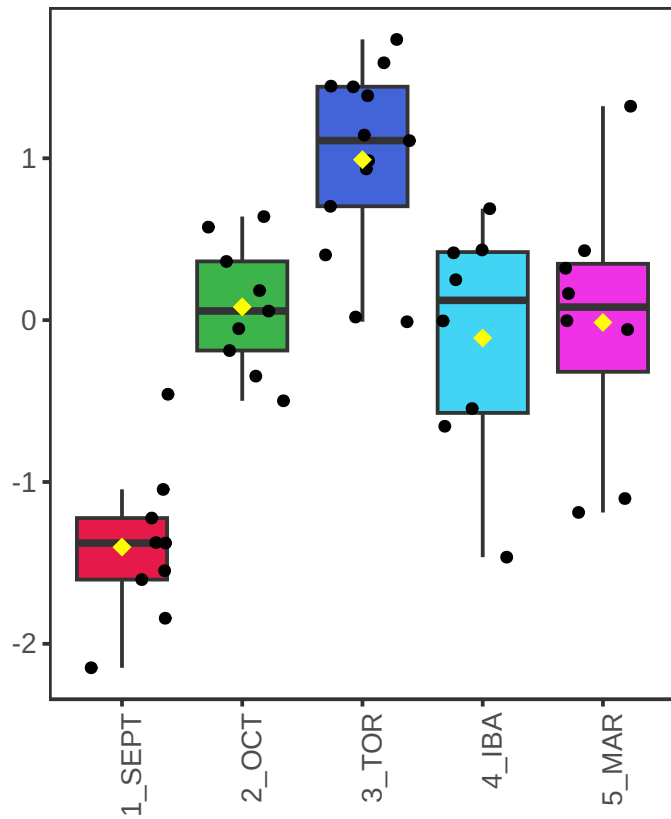

# 1-Vinylimidazole

Original Conc.

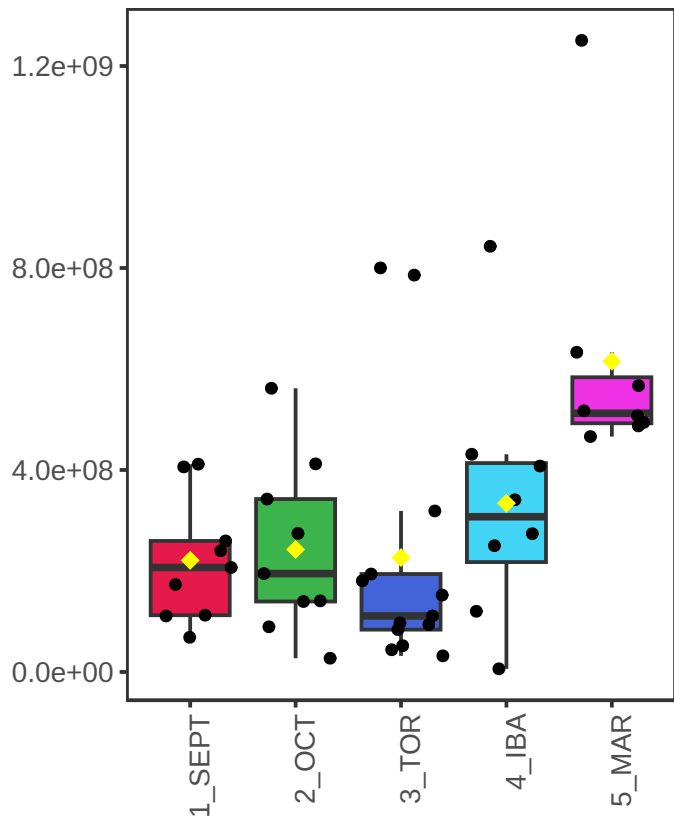

Normalized Conc.

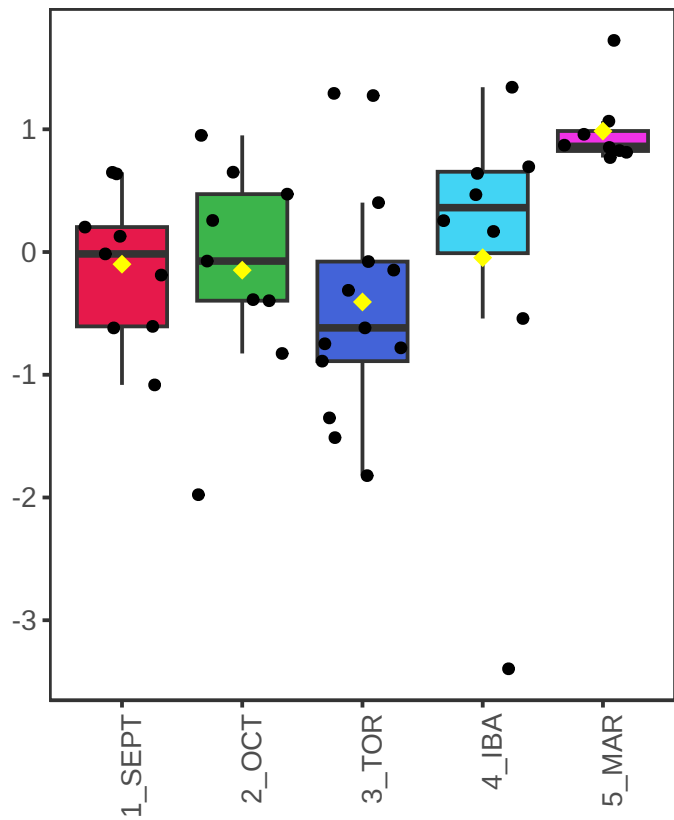

# 2-Aminoadipic acid

Original Conc.

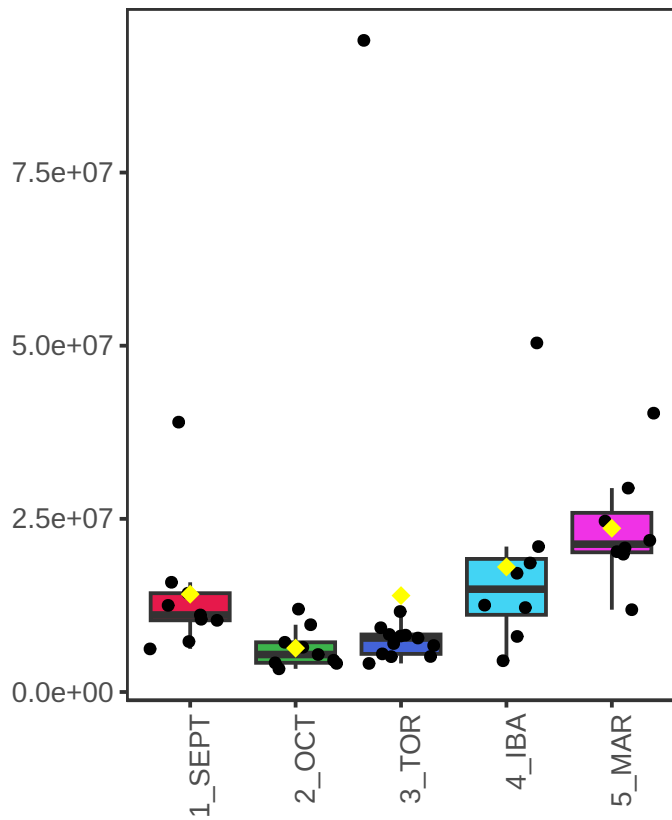

Normalized Conc.

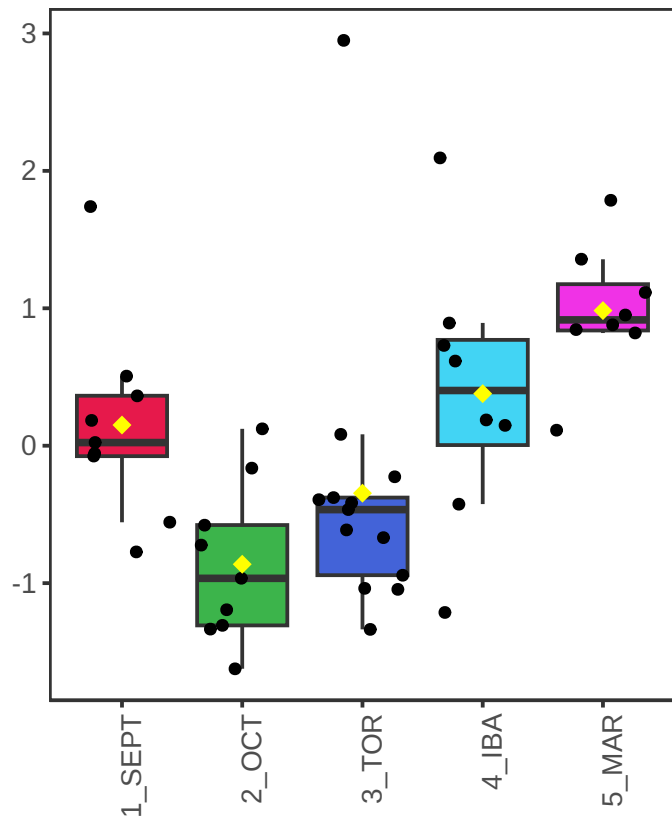



# 2-Aminonicotinic acid

Original Conc.

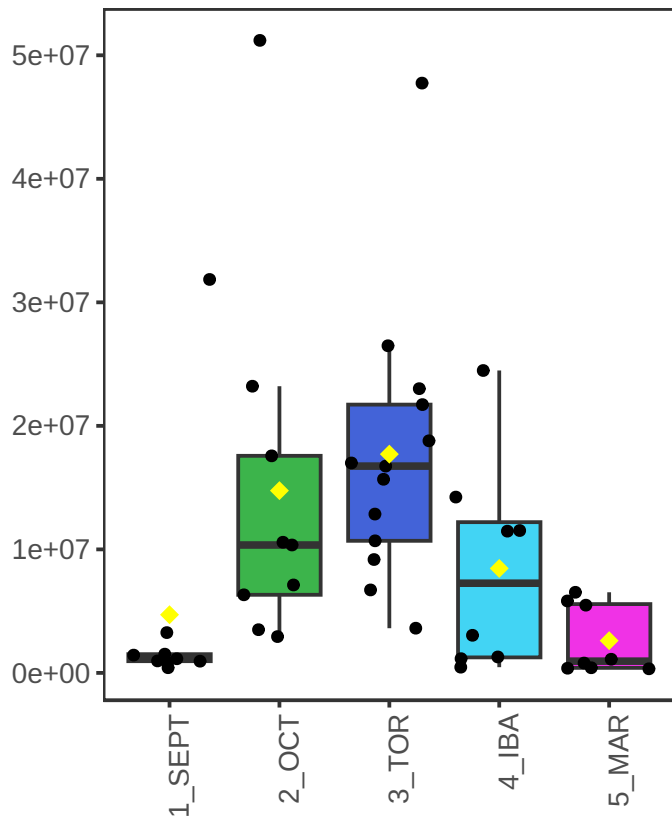

Normalized Conc.

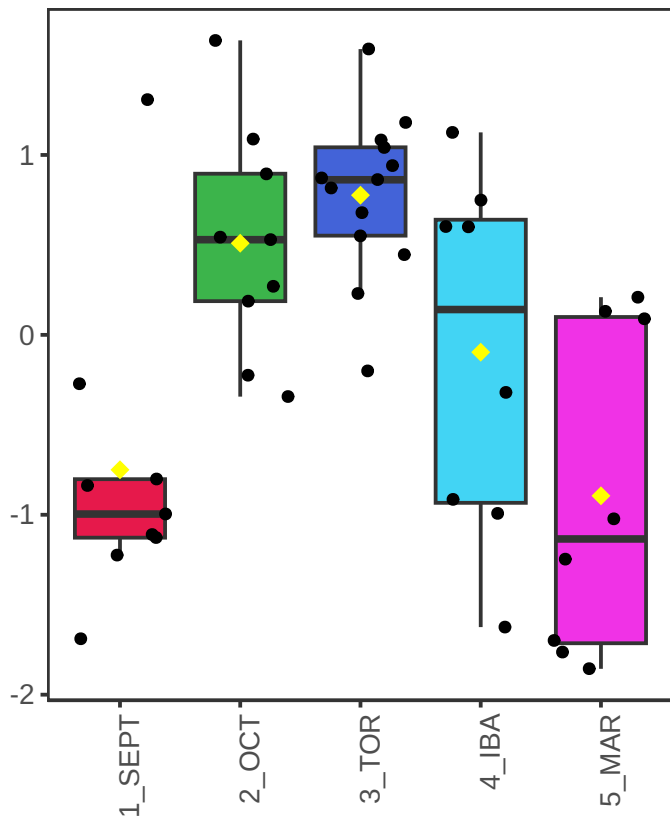

# 2-Methylbutyrylcarnitine

Original Conc.

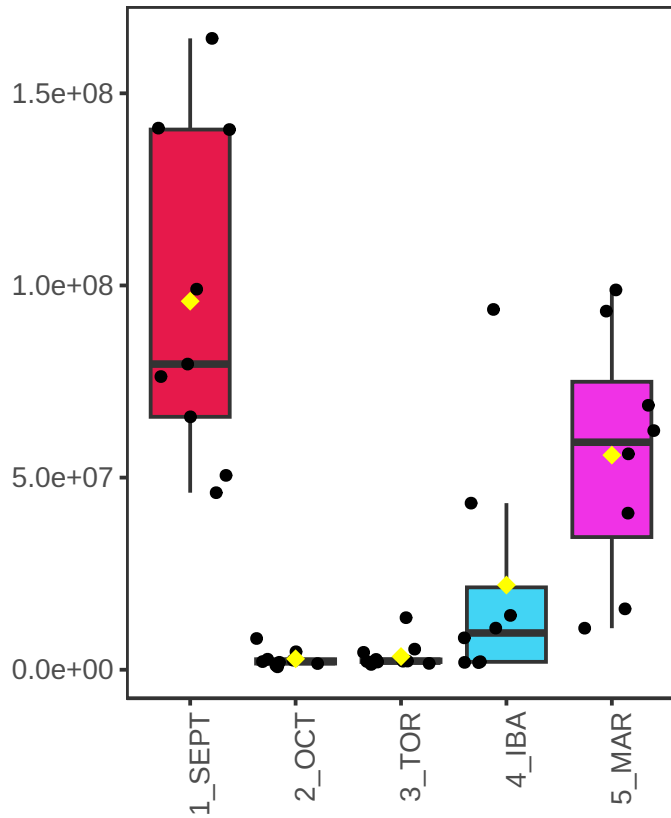

Normalized Conc.

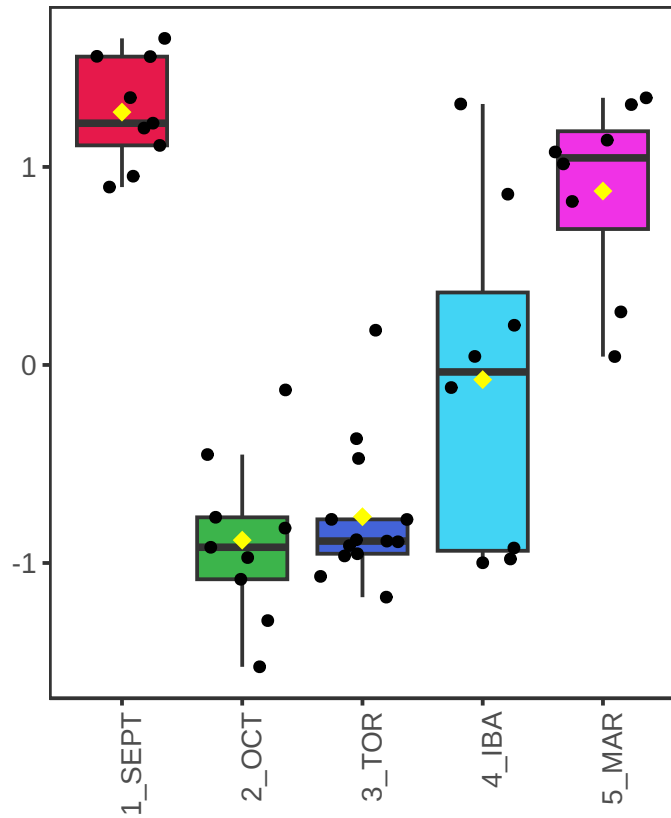

# 2-Oxindole

Original Conc.

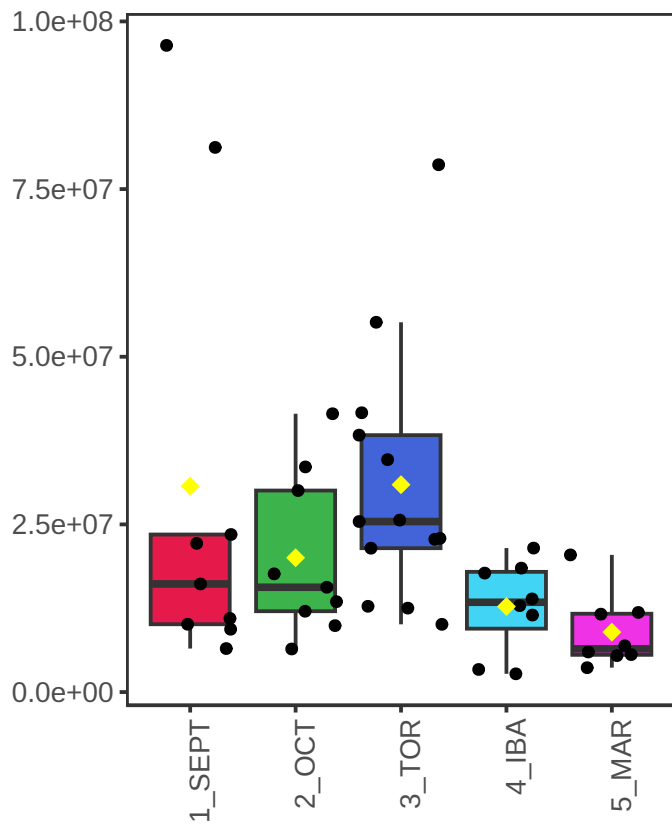

Normalized Conc.

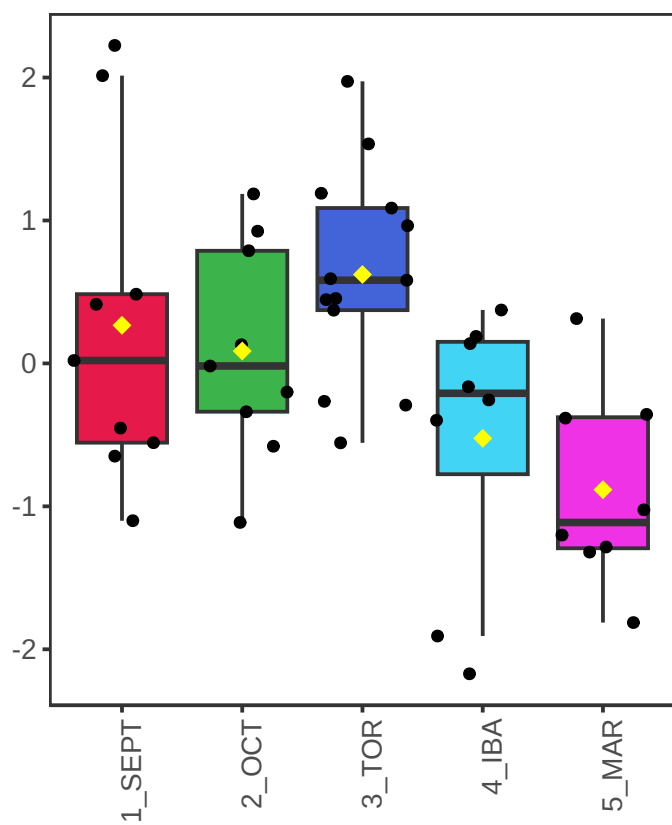

# 2-palmitoyl-sn-glycero-3-phosphocholine

Original Conc.

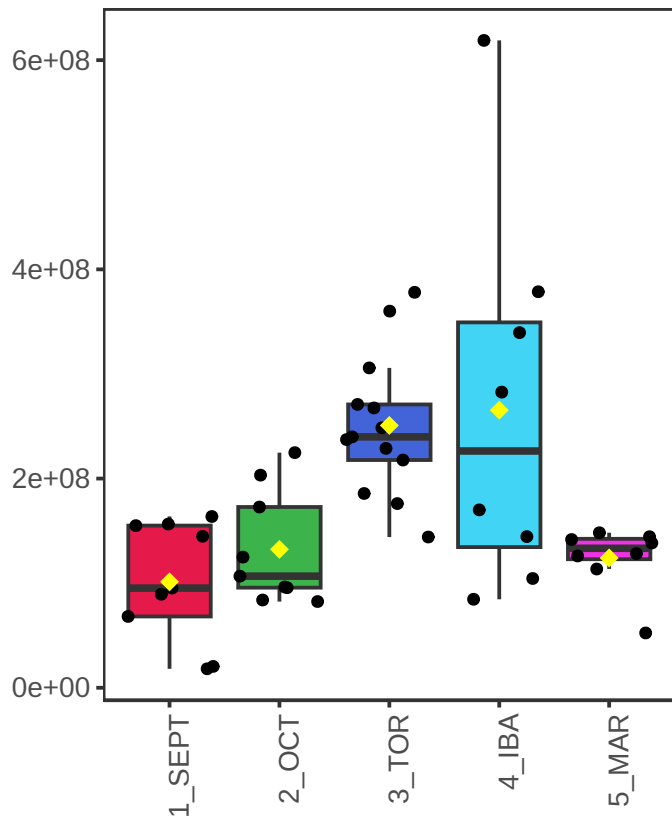

Normalized Conc.

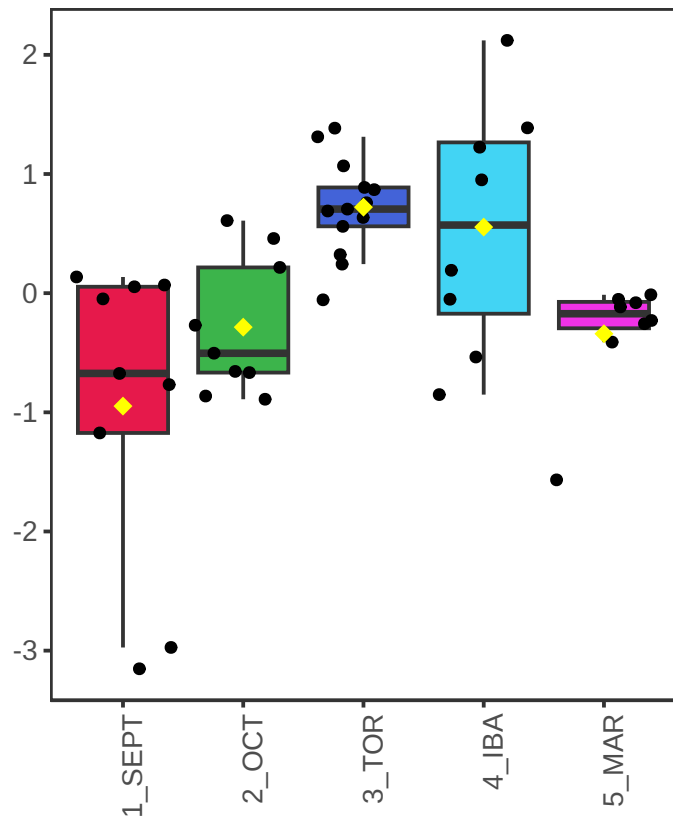

# 3'-CMP

Original Conc.

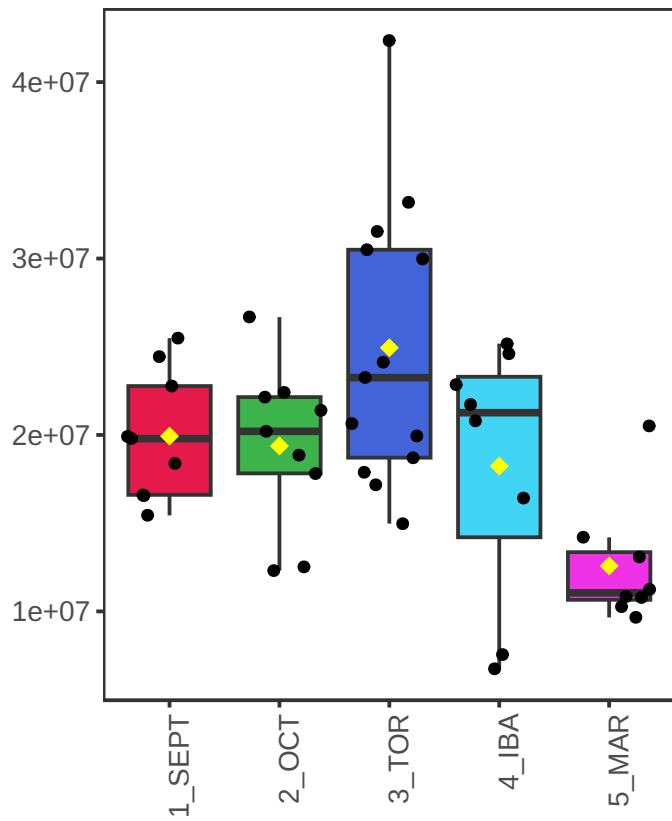

Normalized Conc.

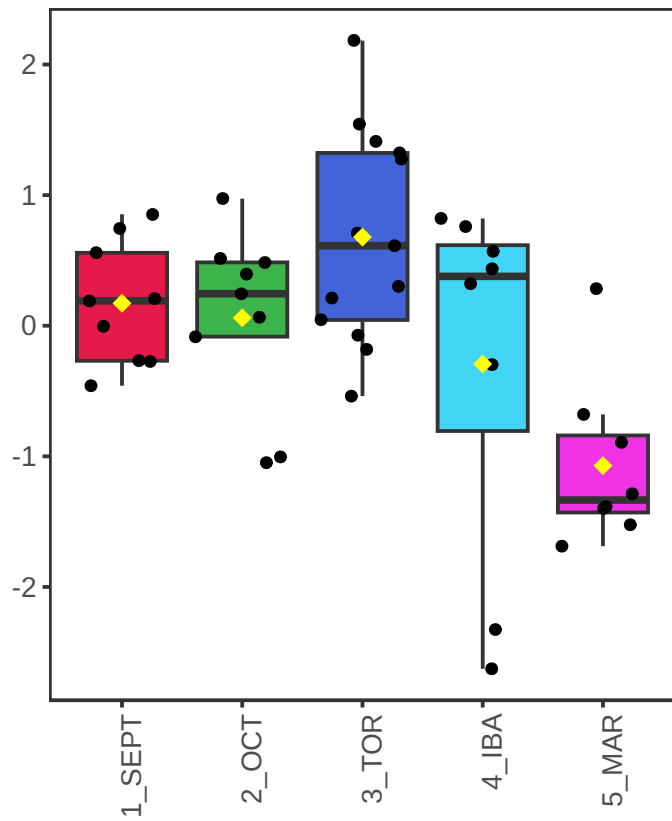

# 3-hydroxybutyrylcarnitine

Original Conc.

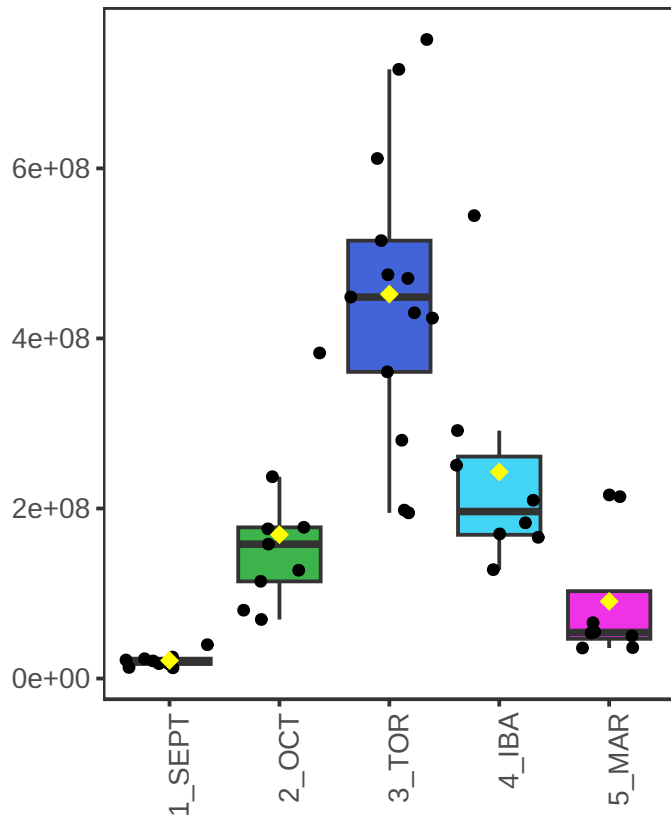

Normalized Conc.

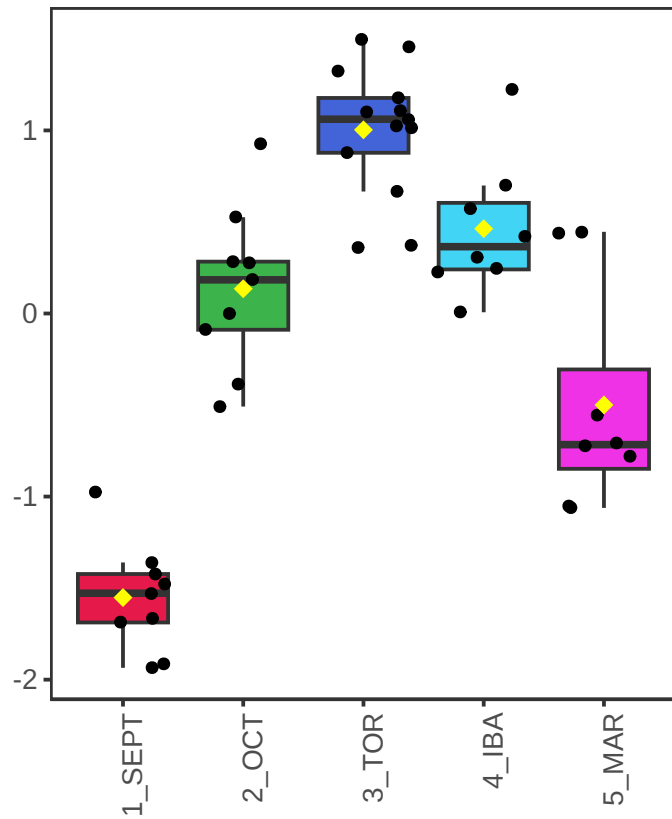

# 3-Hydroxy-cis-5-tetradecenoylcarnitine

Original Conc.

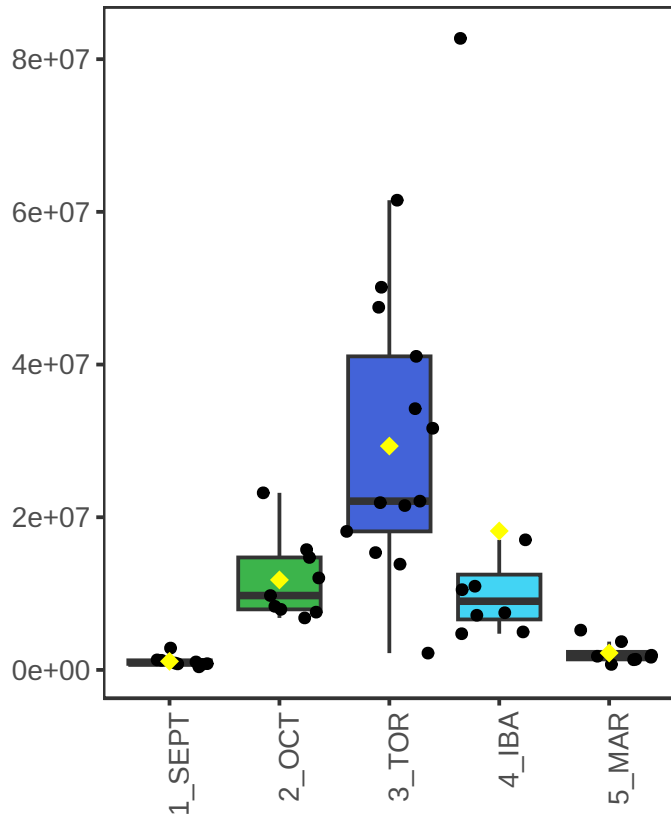

Normalized Conc.

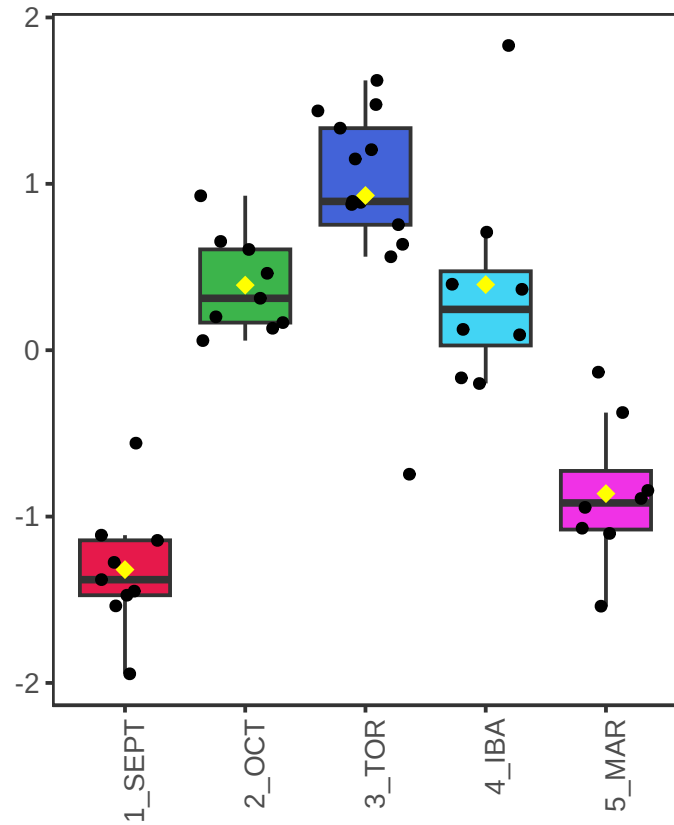

# 3-Hydroxydecanoylcarnitine

Original Conc.

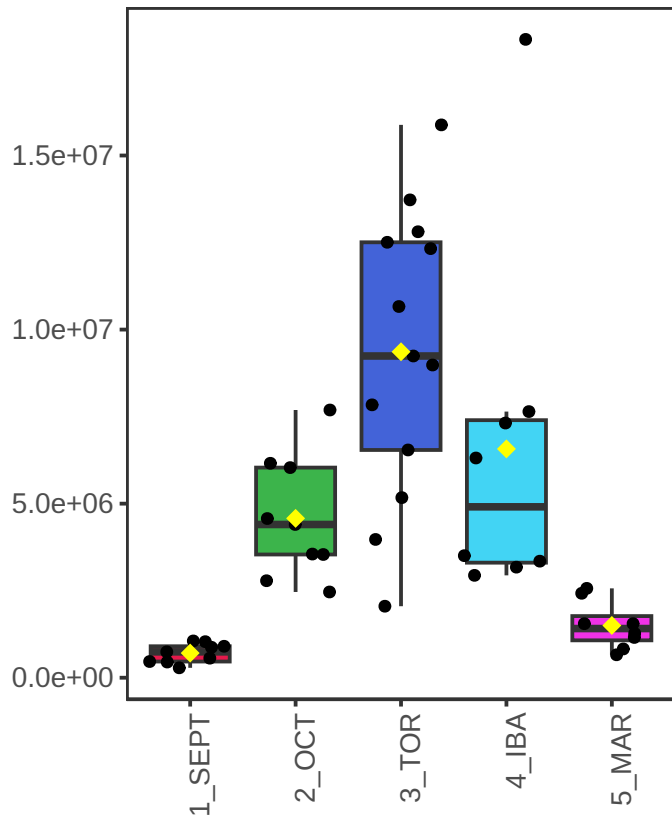

Normalized Conc.

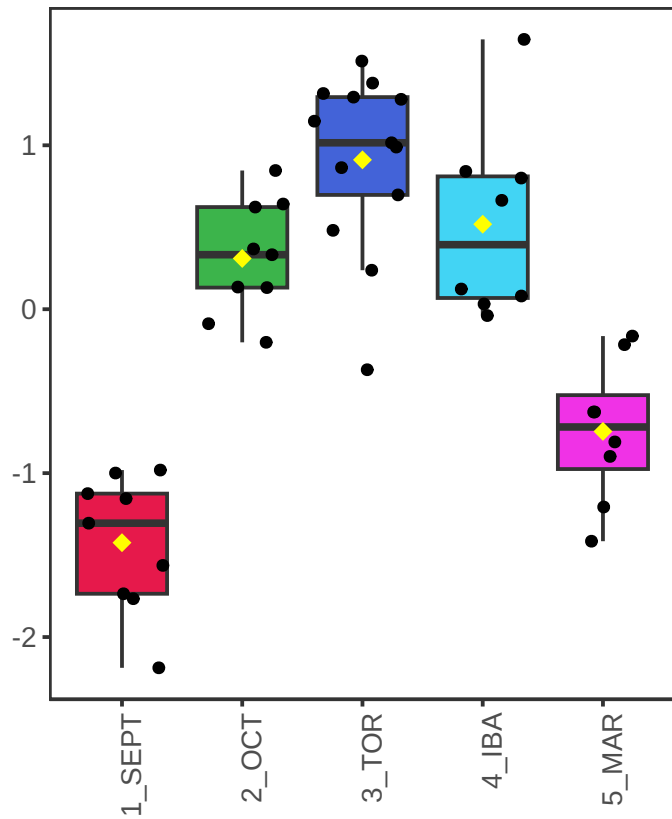



# 3-Hydroxydodecanoylcarnitine

Original Conc.

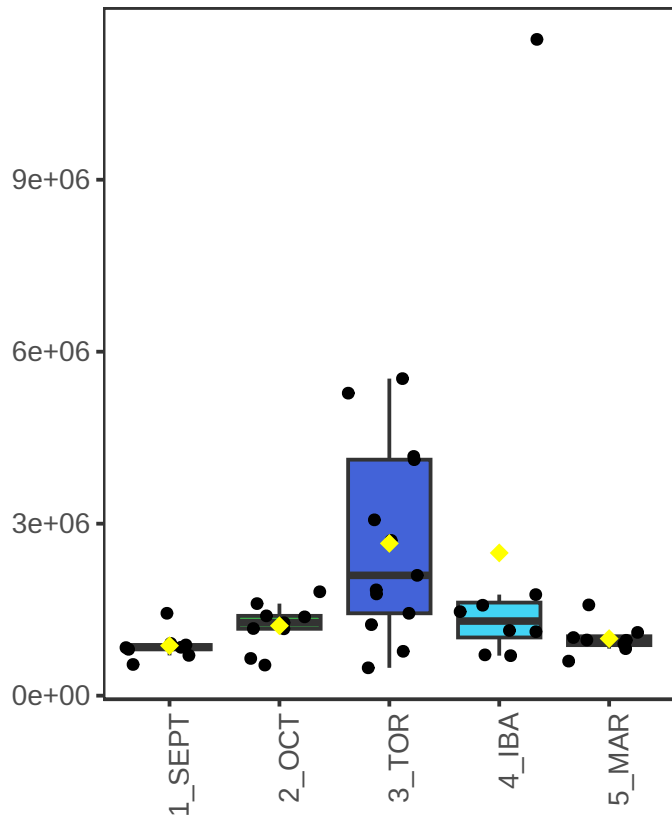

Normalized Conc.

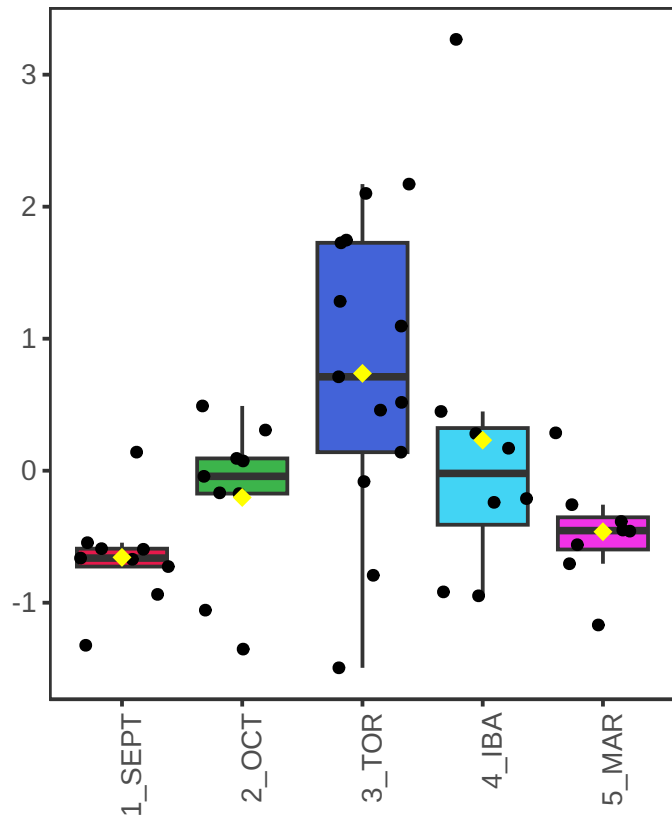

# 3-Hydroxyoctanoylcarnitine

Original Conc.

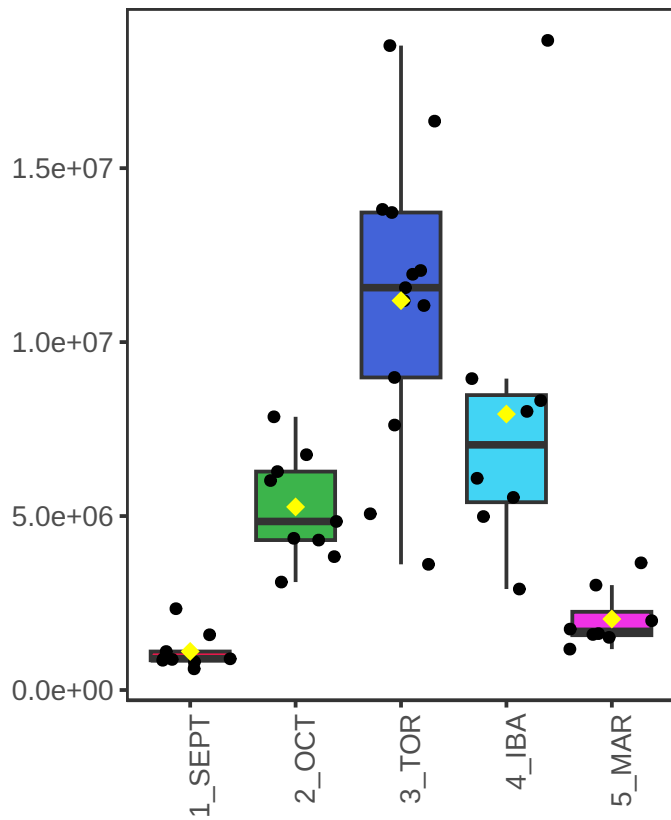

Normalized Conc.

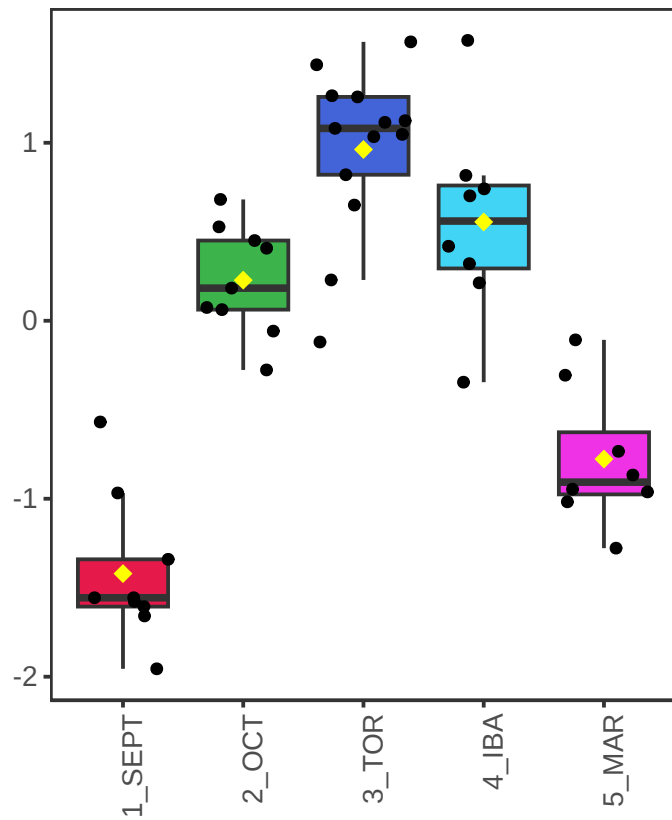

# 3-Hydroxyoctenoylcarnitine

Original Conc.

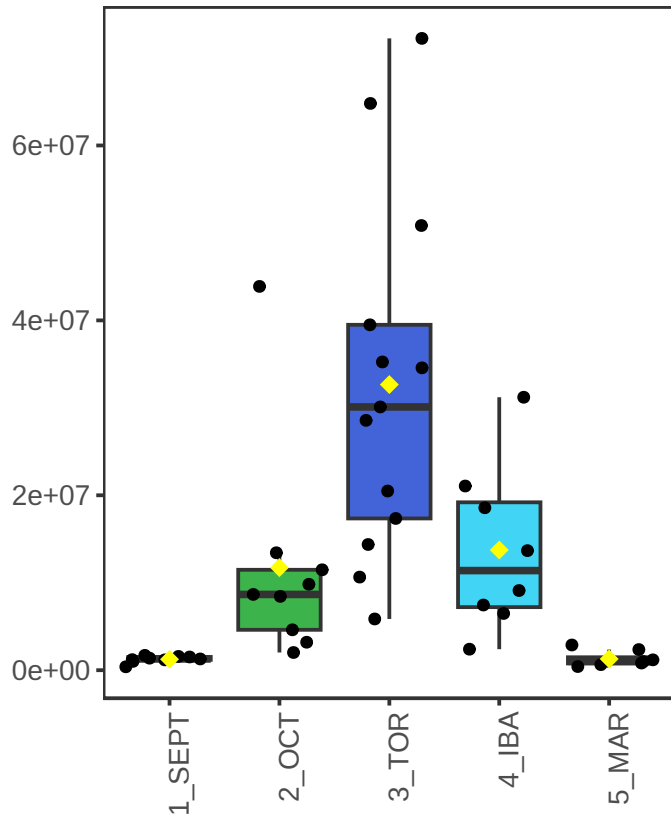

Normalized Conc.

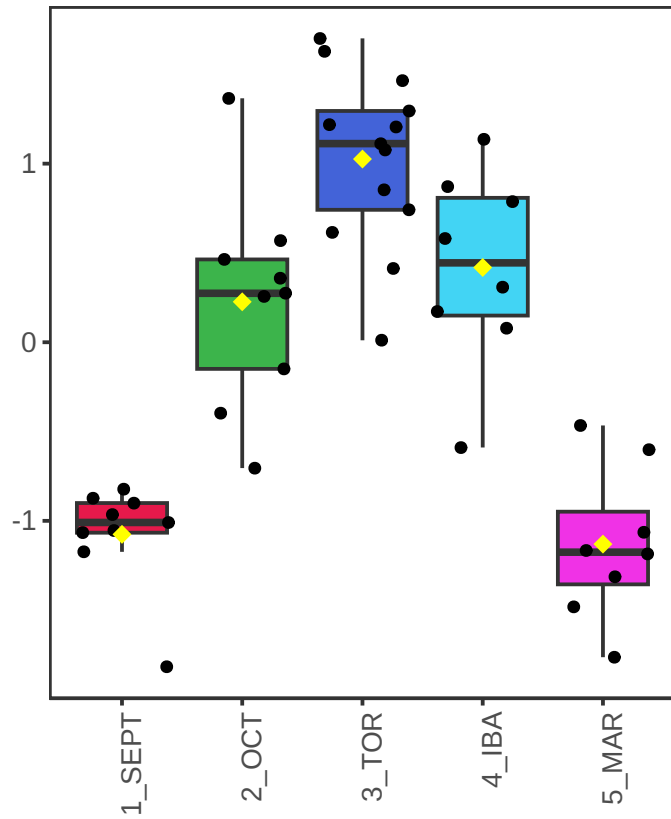

# 3-Methylenenorleucine

Original Conc.

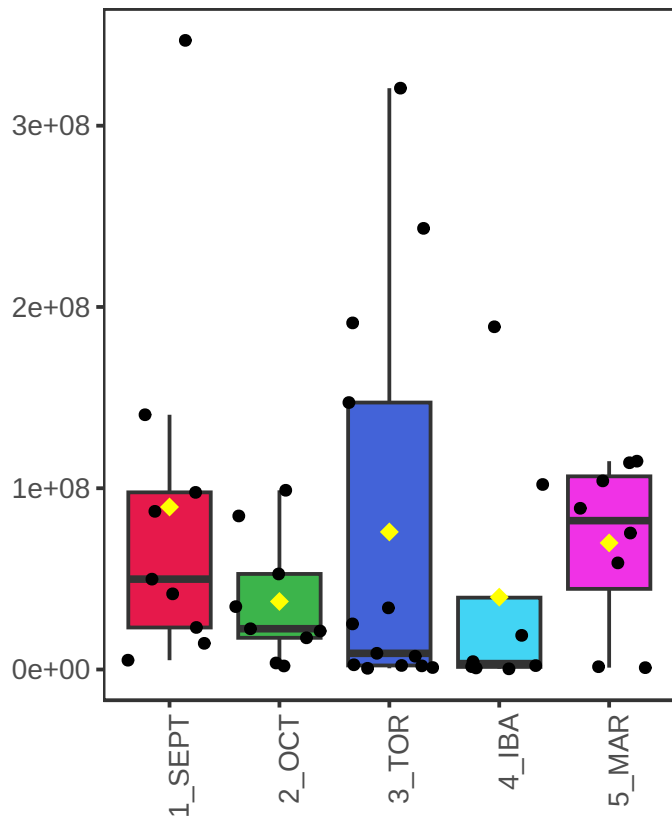

Normalized Conc.

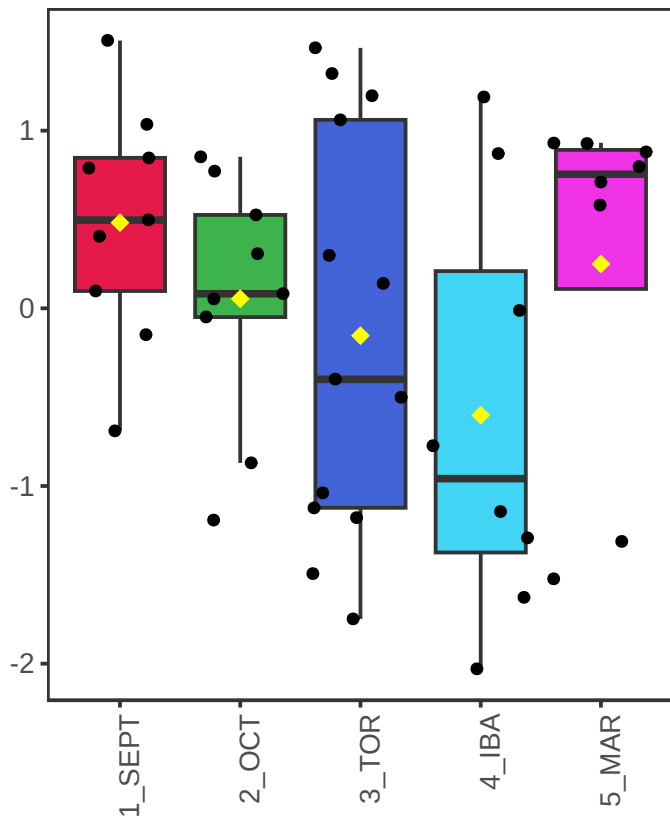

# 3-Methylguanine

Original Conc.

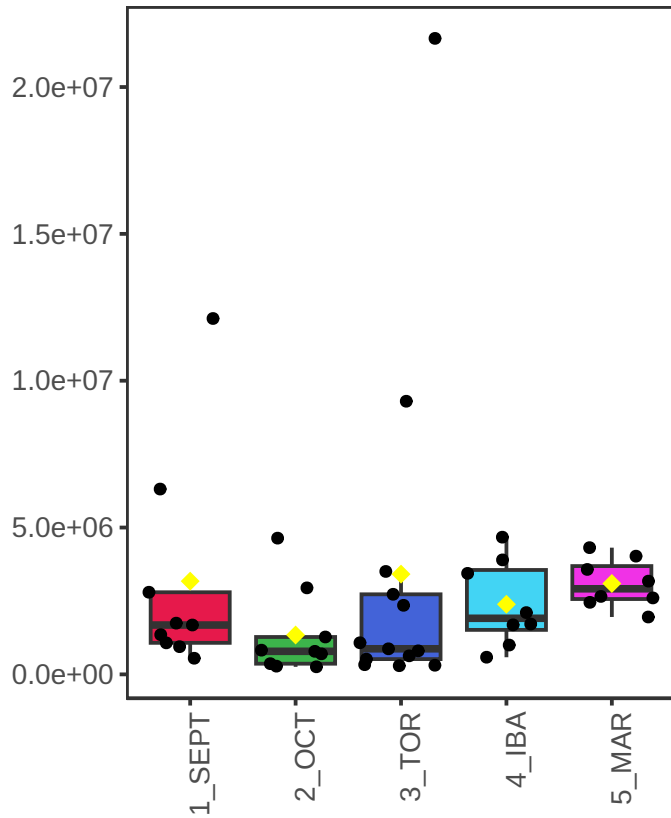

Normalized Conc.

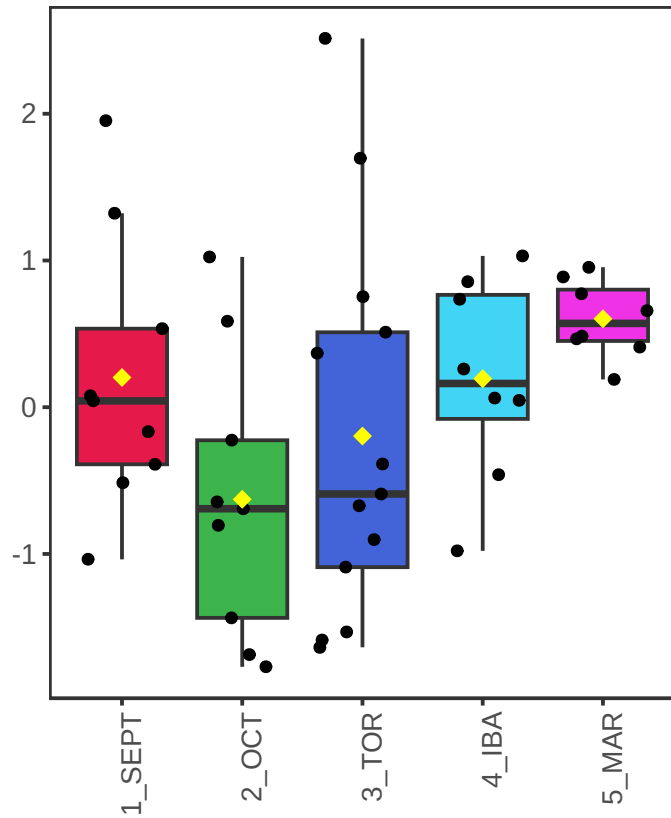

# 3-Ureidopropionic acid

Original Conc.

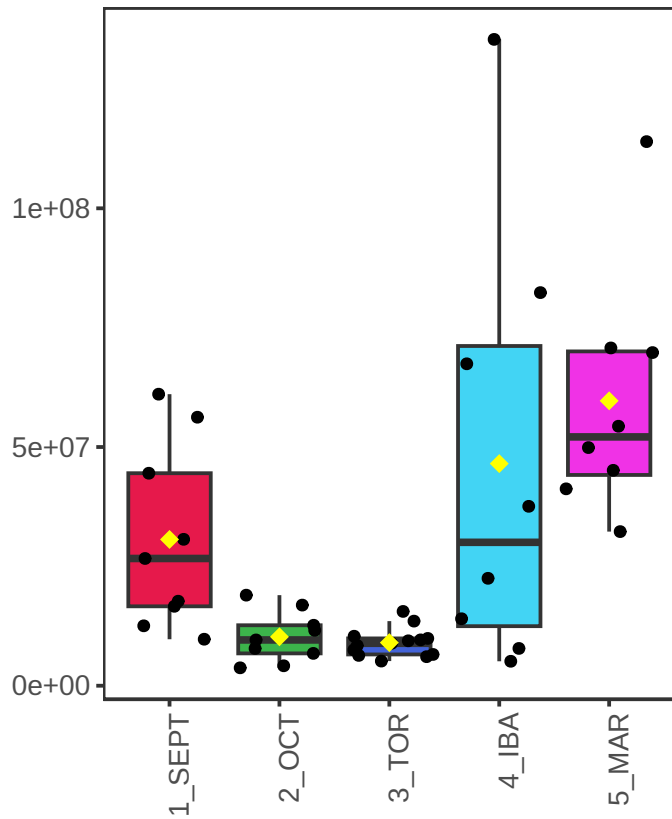

Normalized Conc.

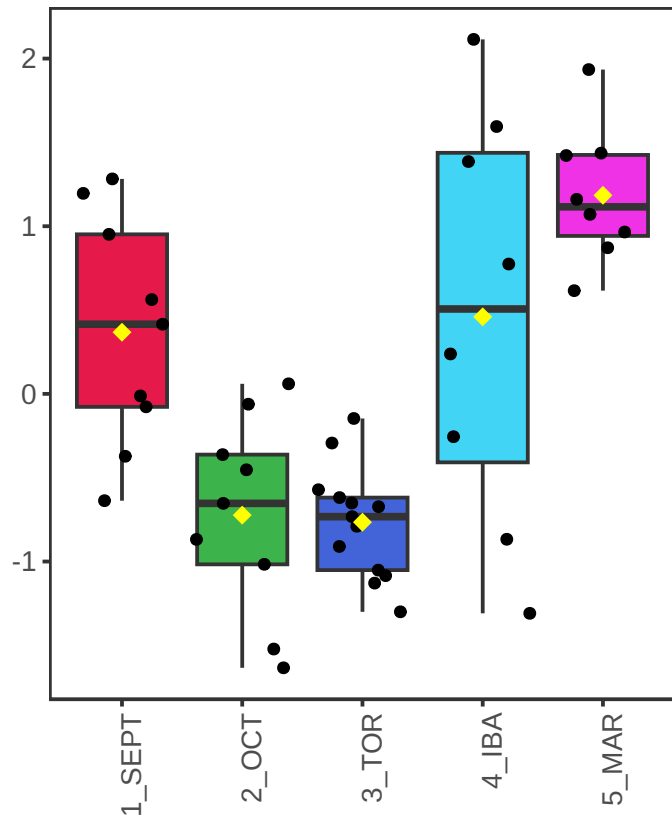

# 4-Acetamidobutanoic acid

Original Conc.

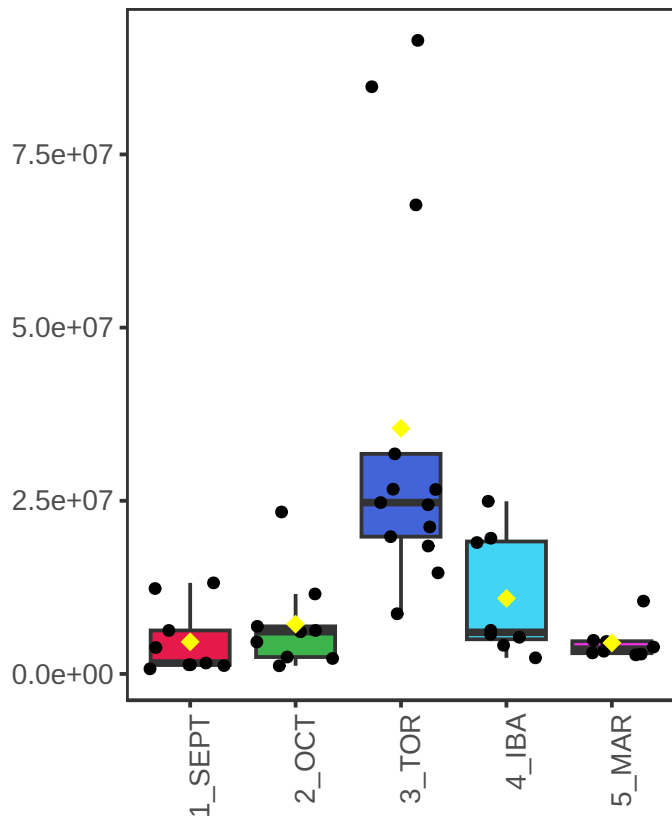

Normalized Conc.

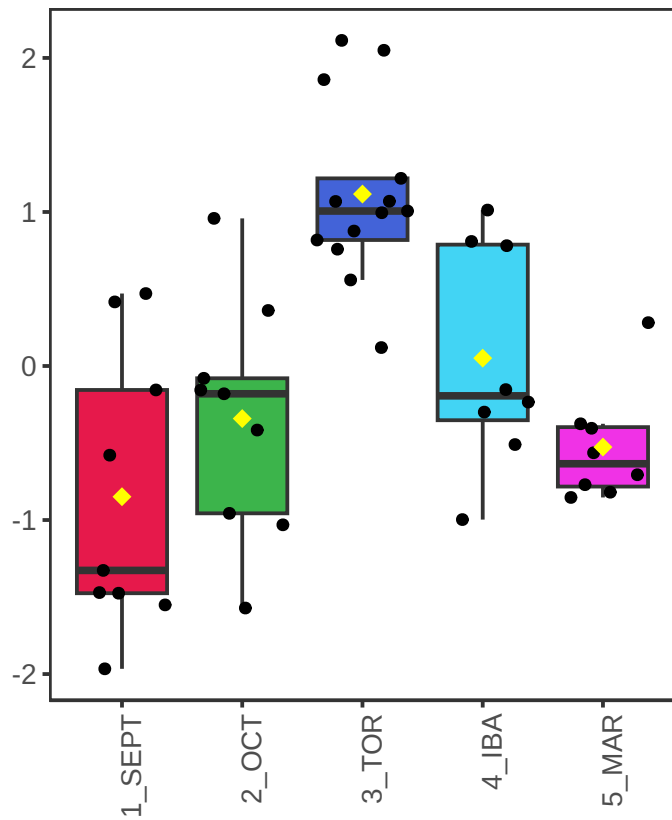

# 4-Amino-4-deoxypentopyranose

Original Conc.

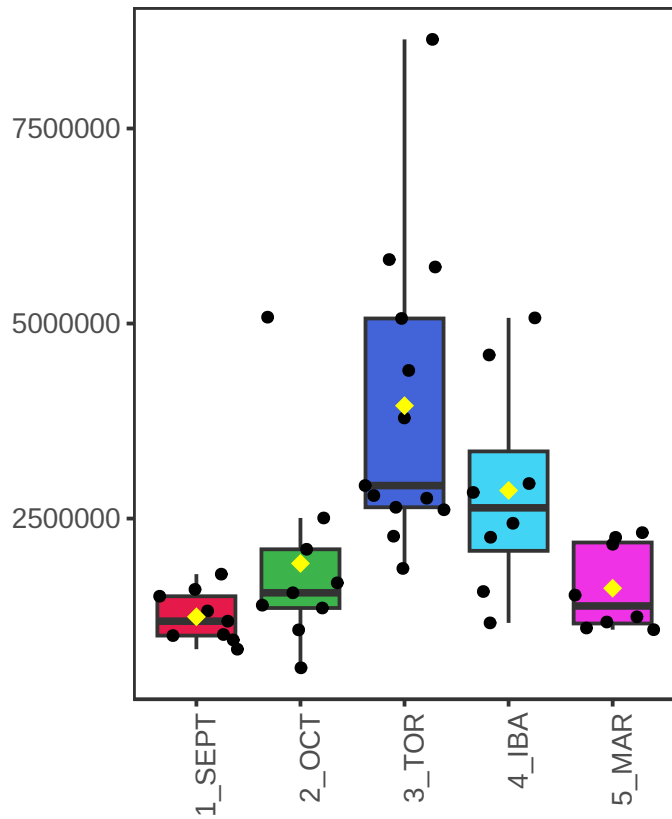

Normalized Conc.

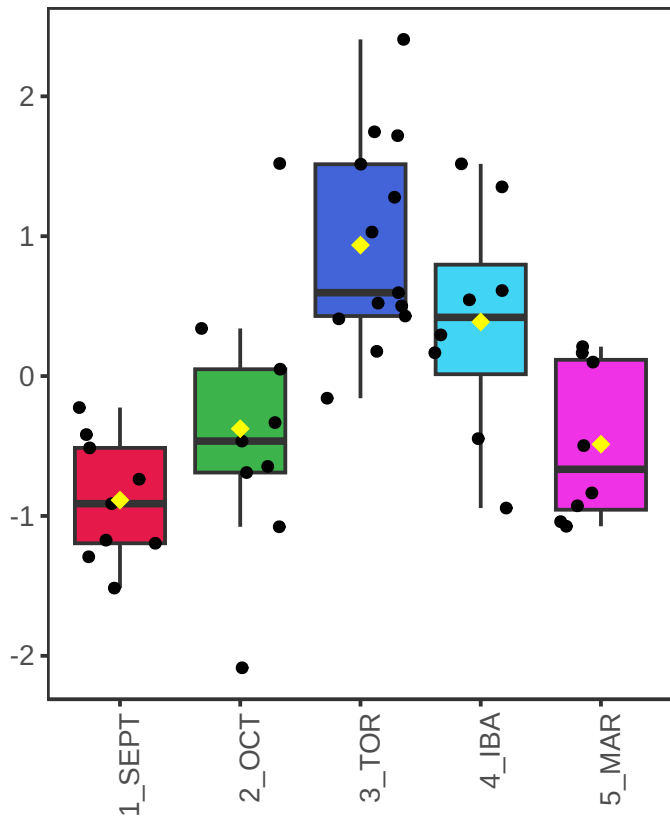



# 4-Guanidinobutyric acid

Original Conc.

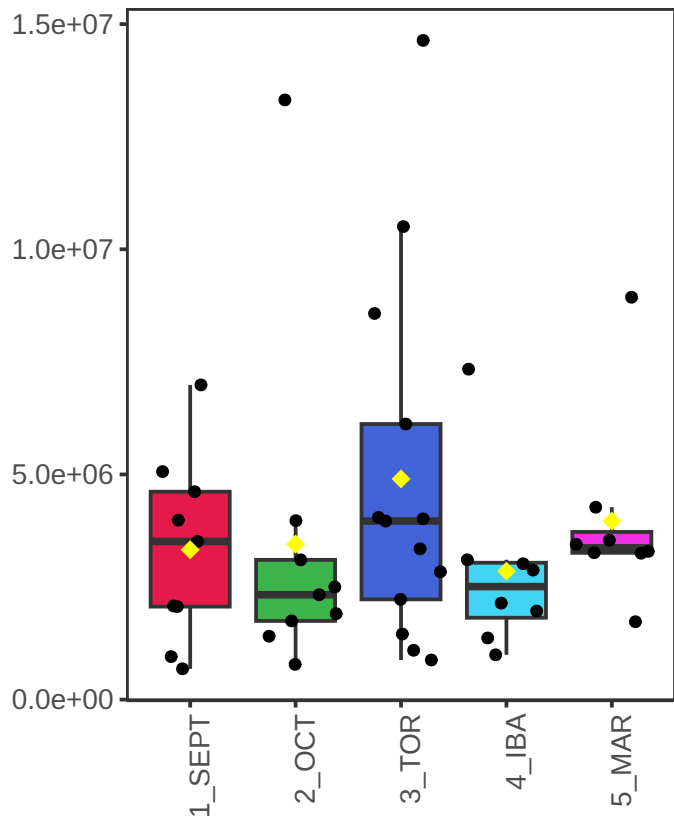

Normalized Conc.

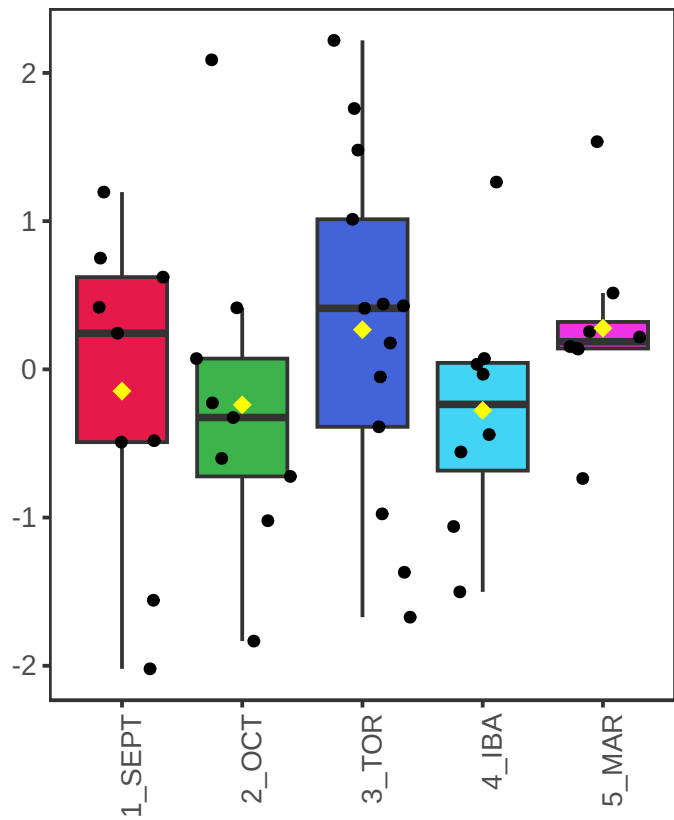

# 4'-Phosphopantetheine

Original Conc.

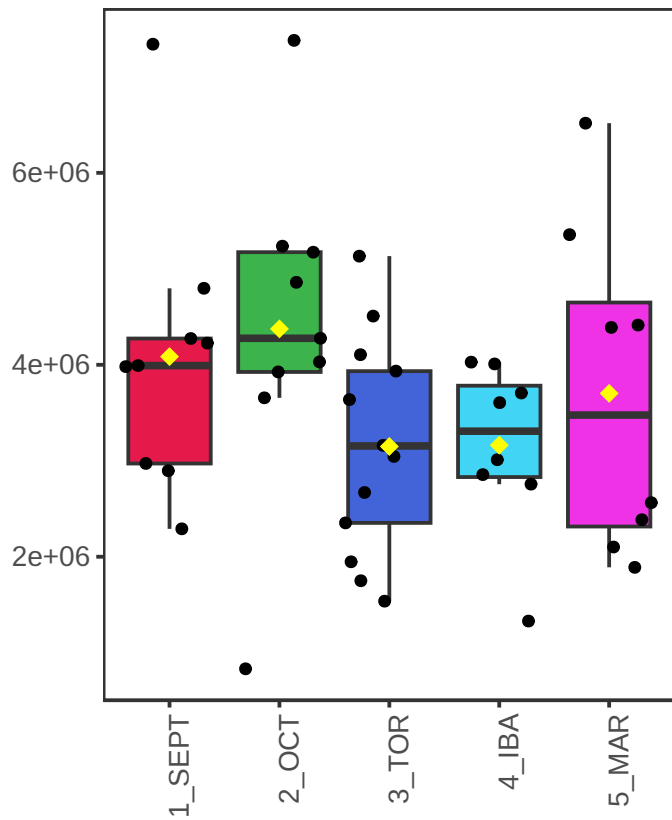

Normalized Conc.

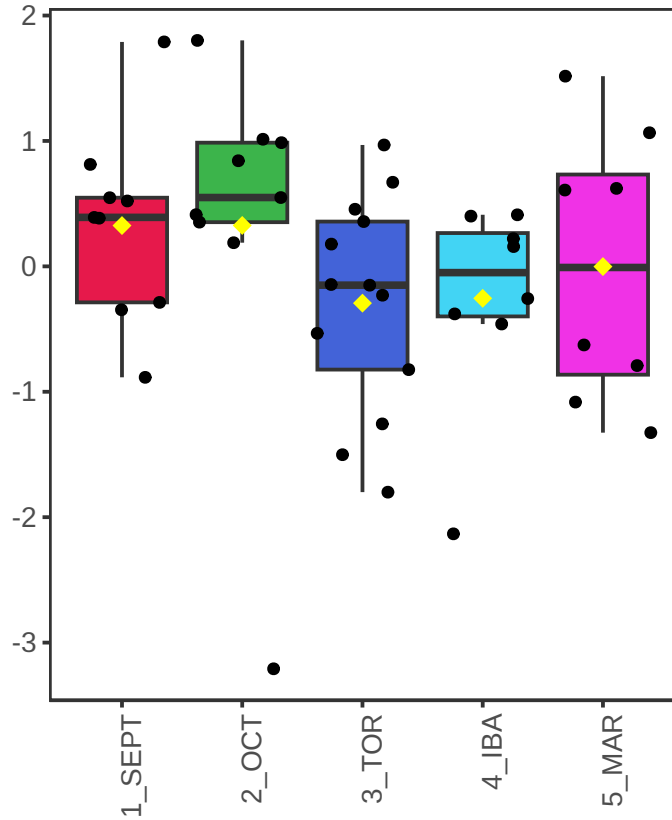

# 5-methylthioribose

Original Conc.

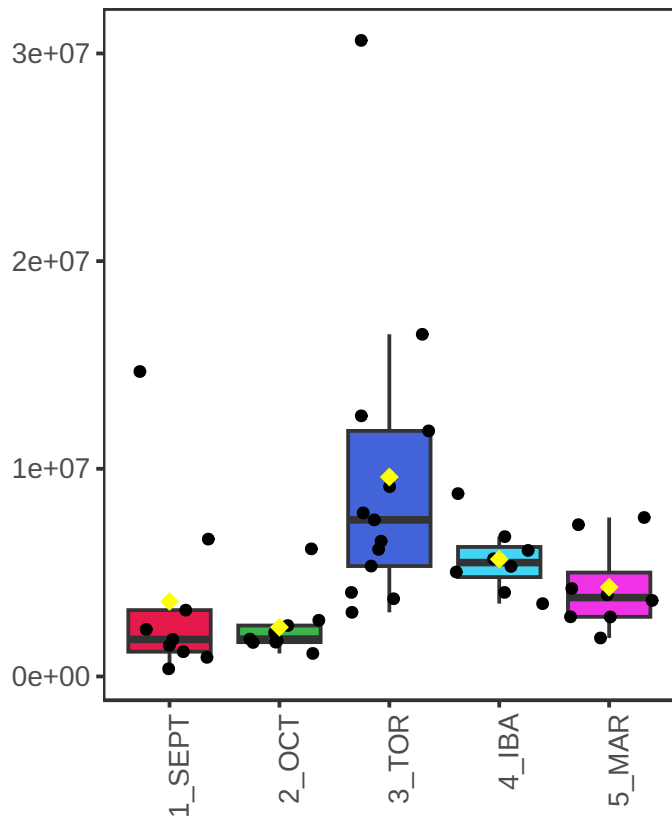

Normalized Conc.

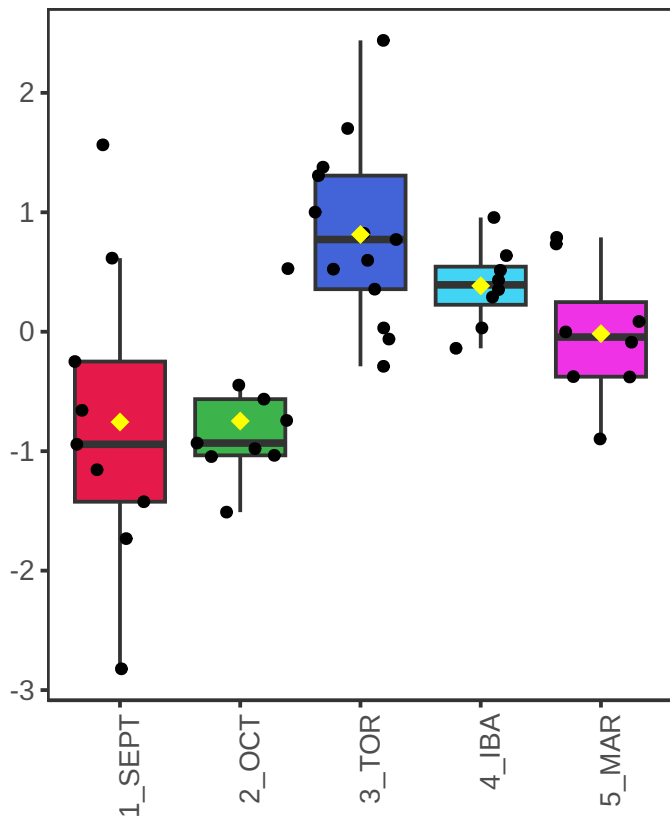

# 5-Nitro-o-toluidine

Original Conc.

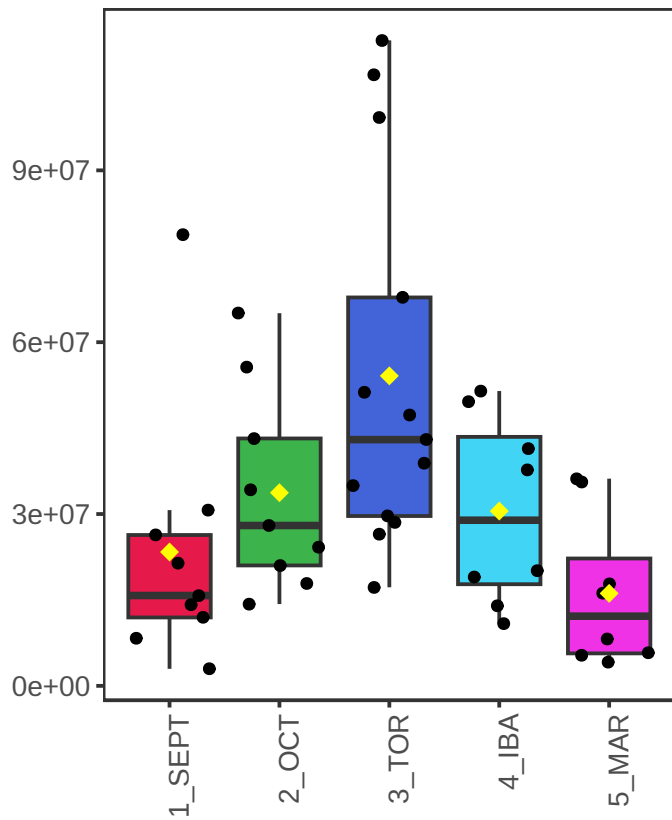

Normalized Conc.

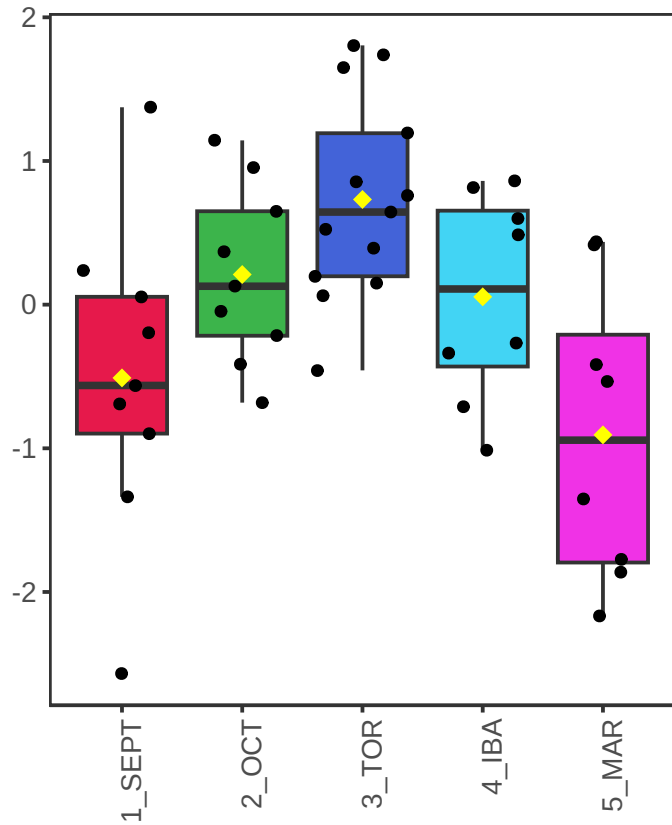

# 5'-S-Methyl-5'-thioadenosine

Original Conc.

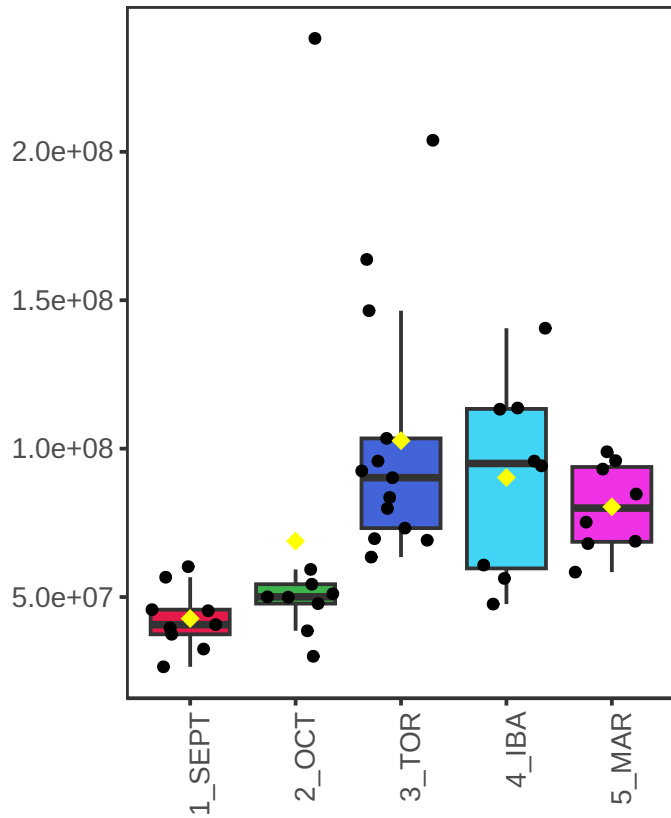

Normalized Conc.

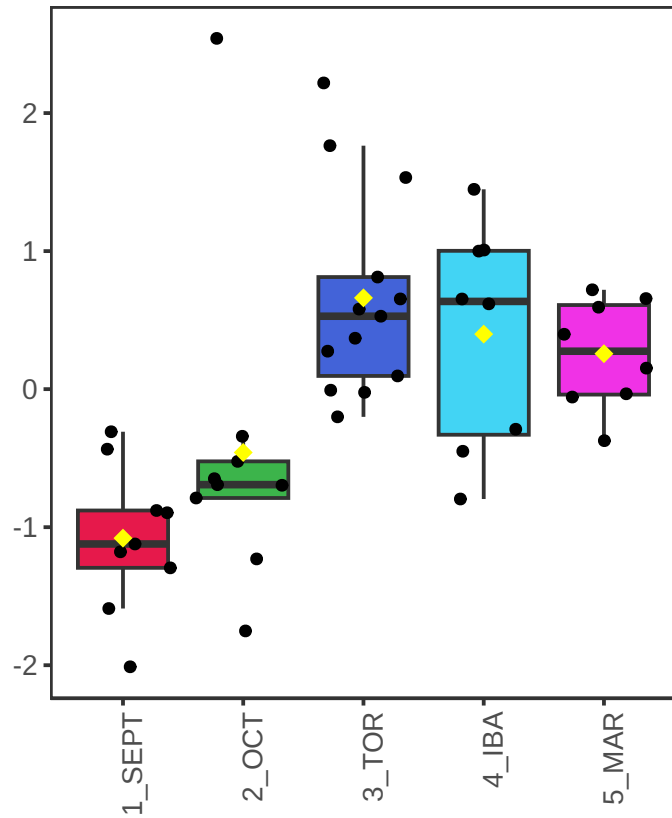

# 6-Aminocaproic acid

Original Conc.

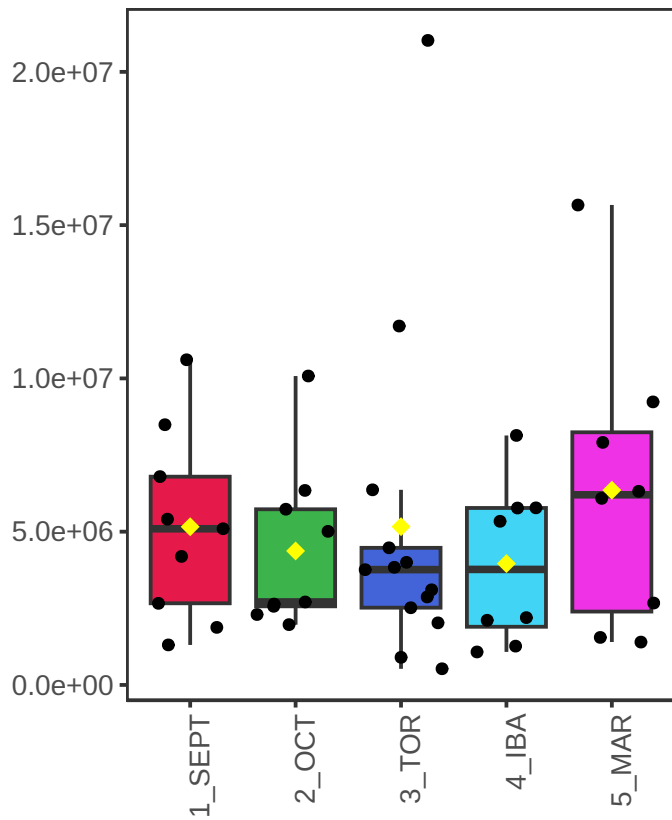

Normalized Conc.

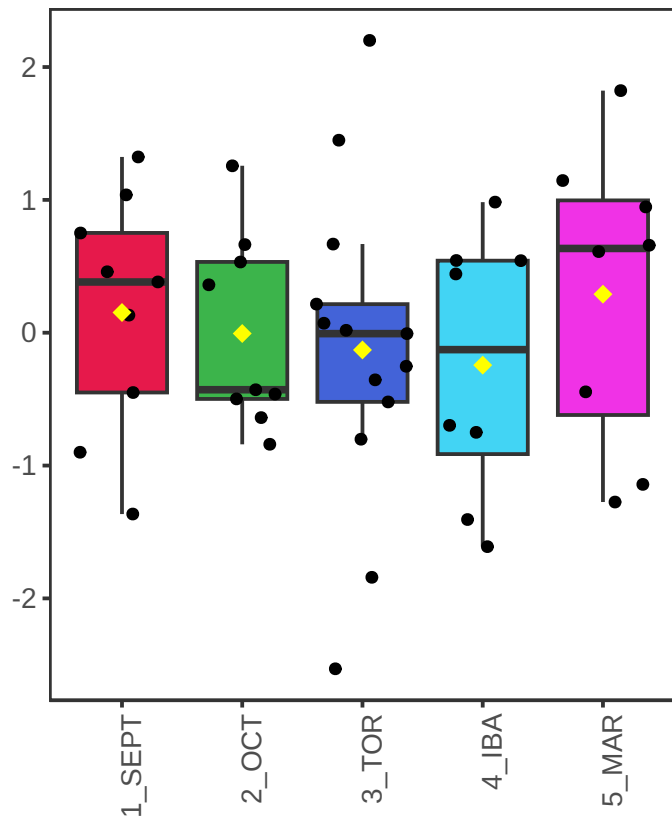

# 6-Hydroxycaproic acid

Original Conc.

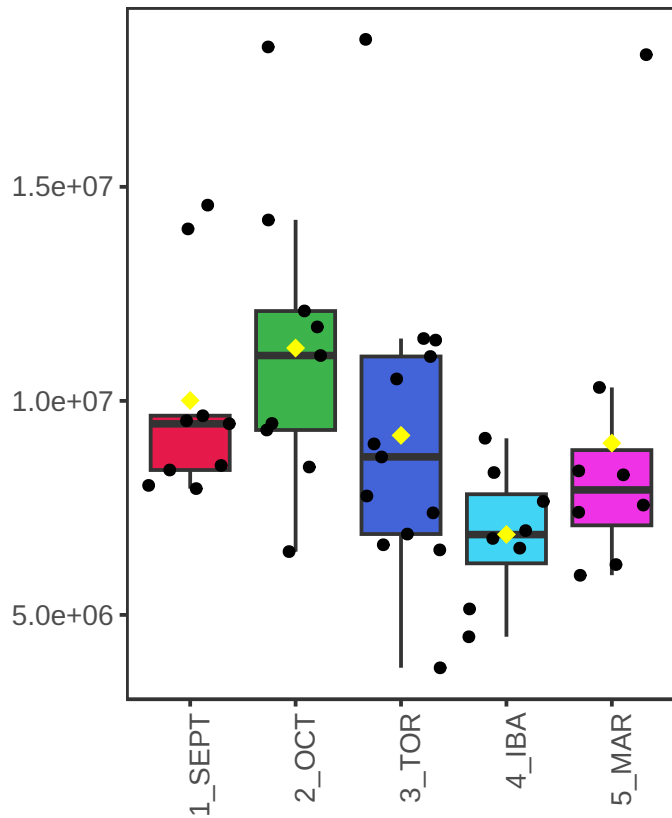

Normalized Conc.

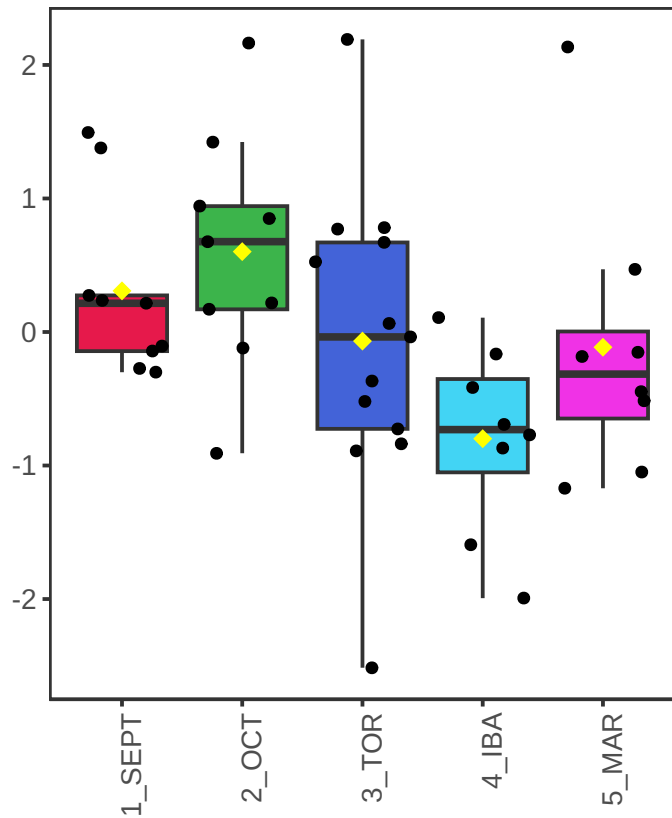

# 6-Ketoprostaglandin F1a

Original Conc.

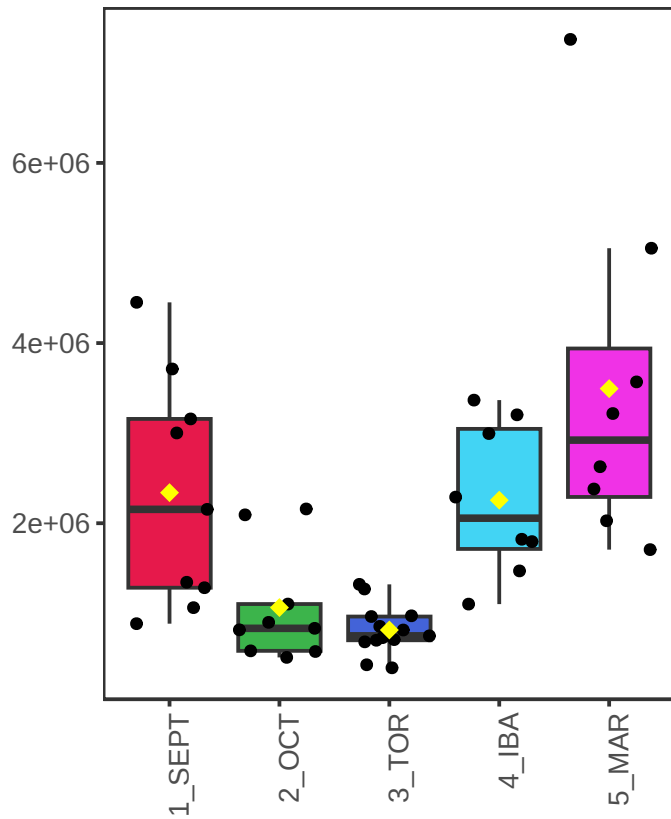

Normalized Conc.

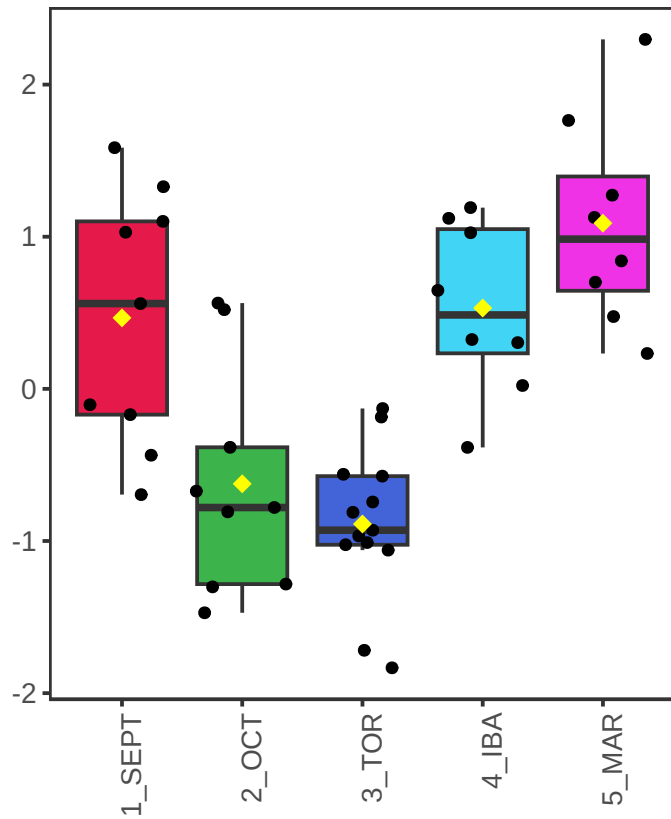



# 6-Methylnicotinamide

Original Conc.

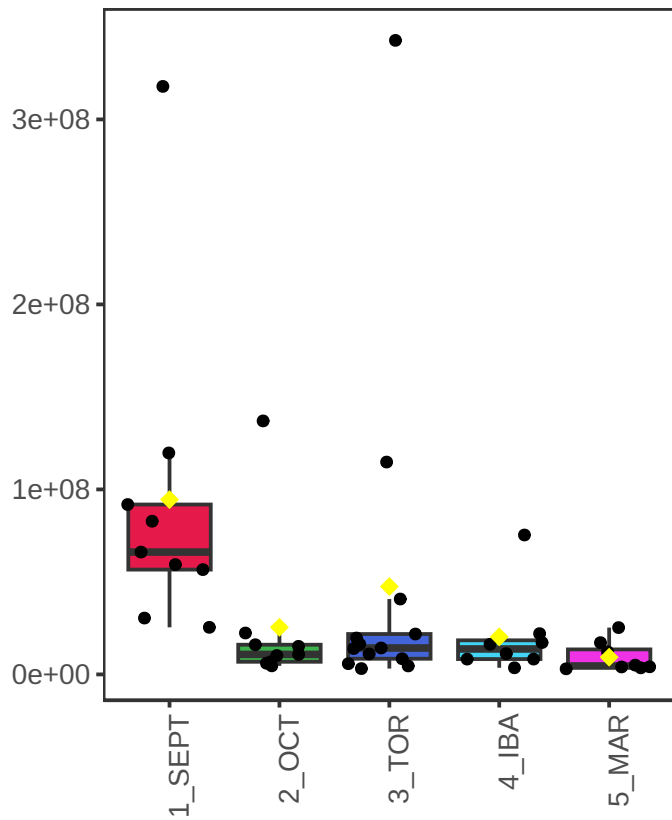

Normalized Conc.

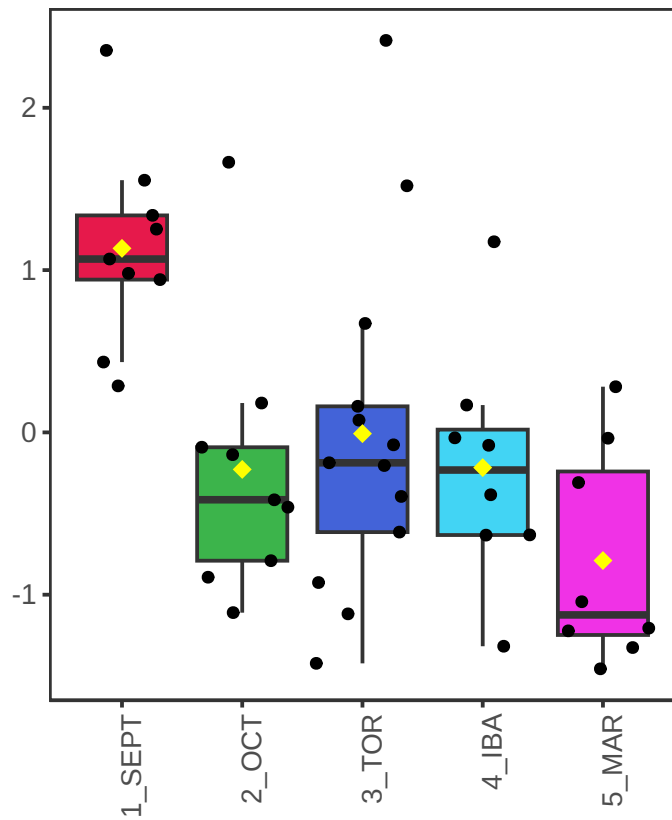

# 7-Methylguanine

Original Conc.

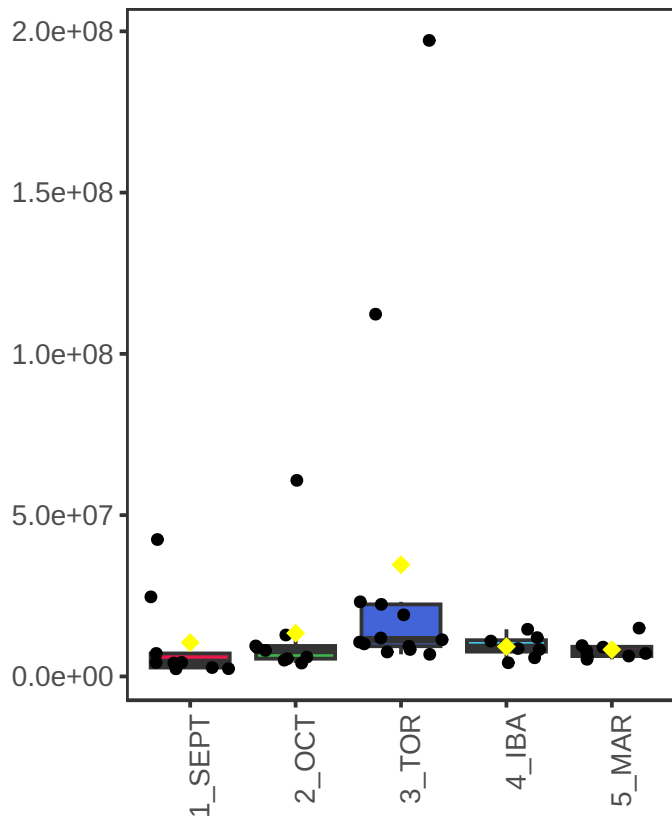

Normalized Conc.

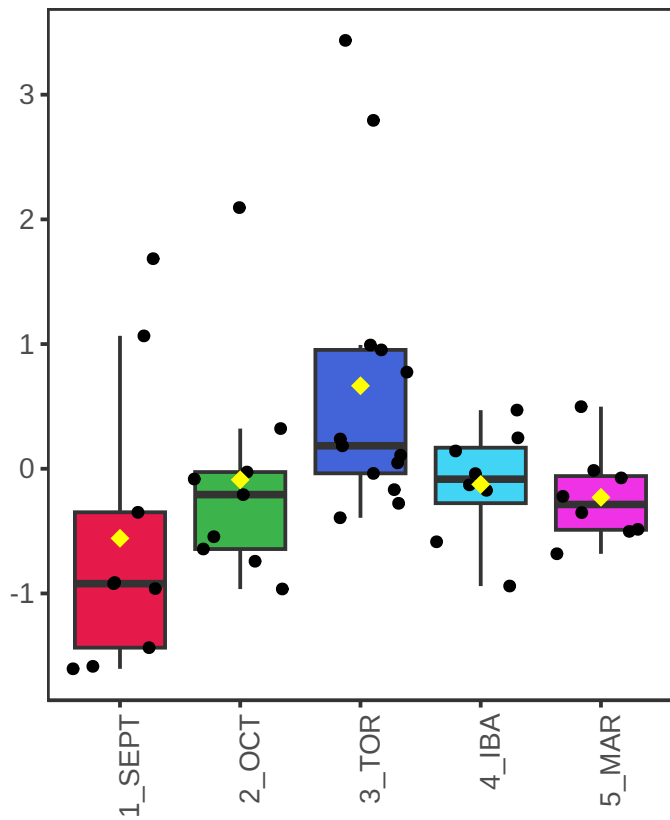

# 12-Aminododecanoic acid

Original Conc.

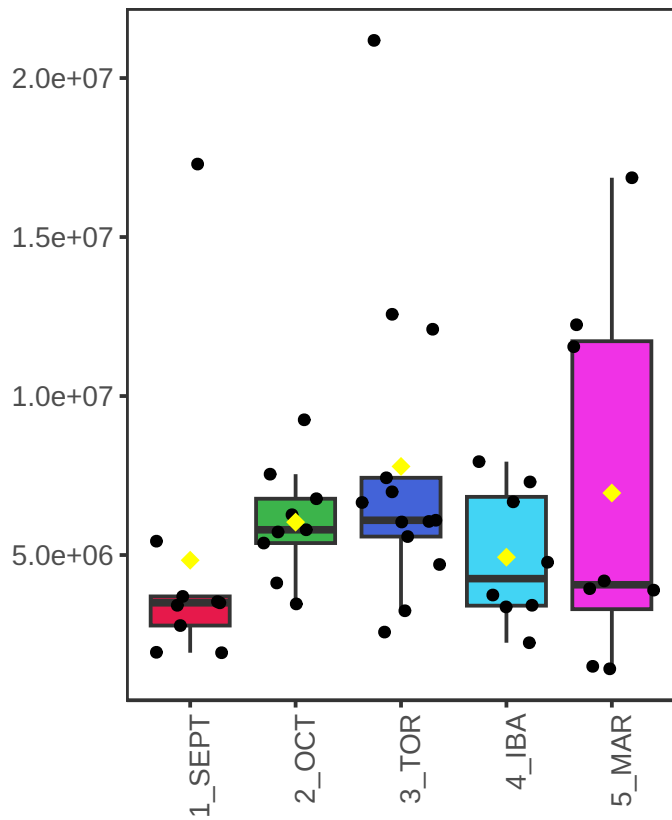

Normalized Conc.

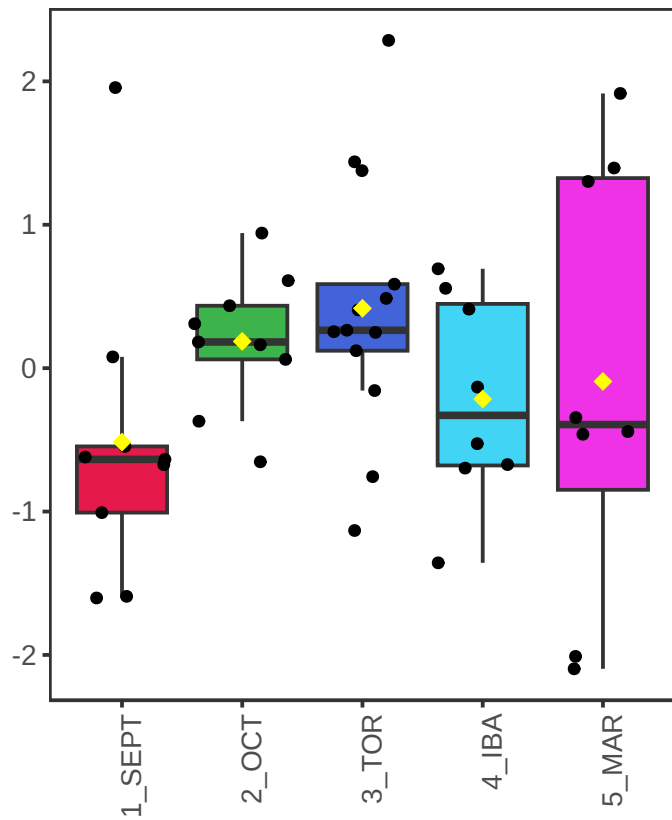

# (15-Carboxypentadecanoyl)carnitine

Original Conc.

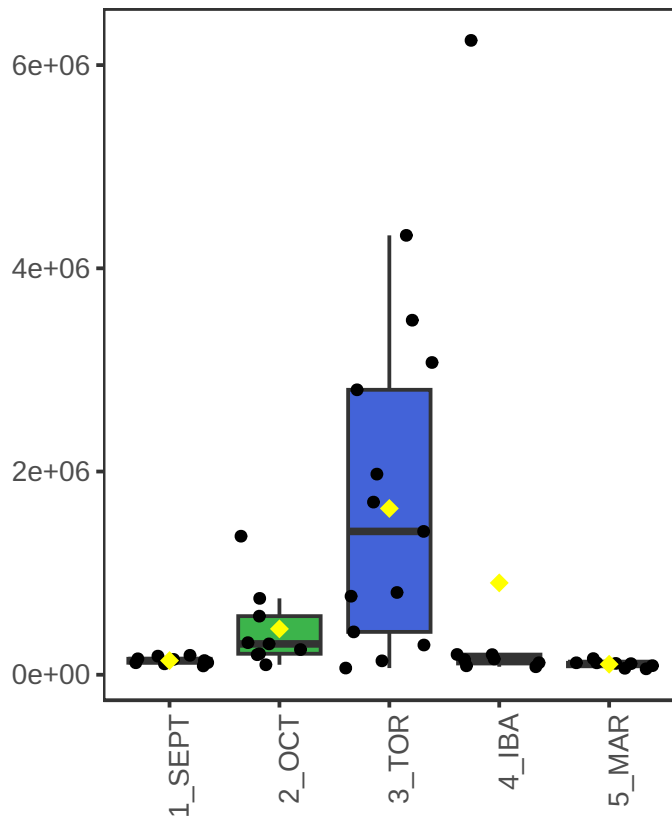

Normalized Conc.

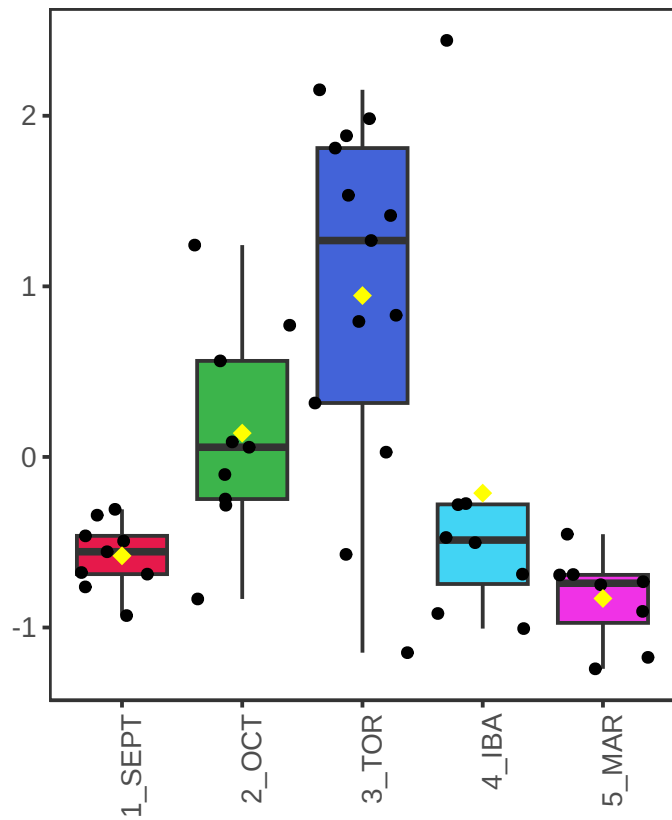

# 2,6-Dimethylpyrazine

Original Conc.

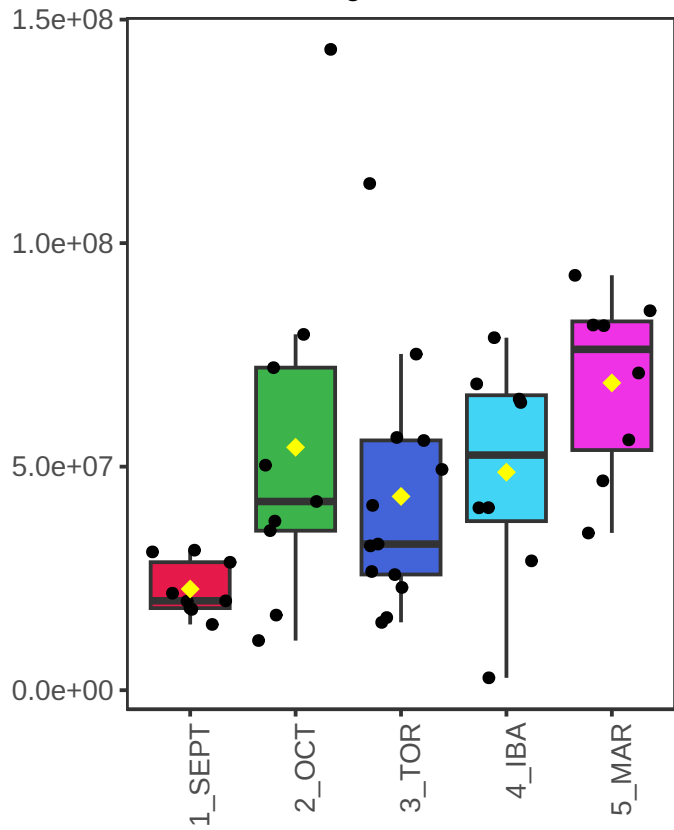

Normalized Conc.

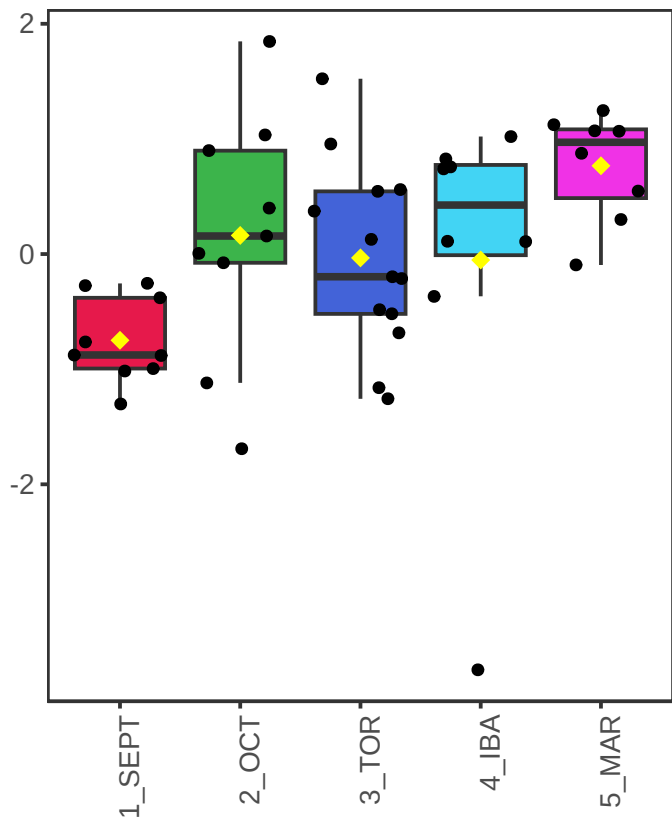

# 3,4-Methylenesebacic acid

Original Conc.

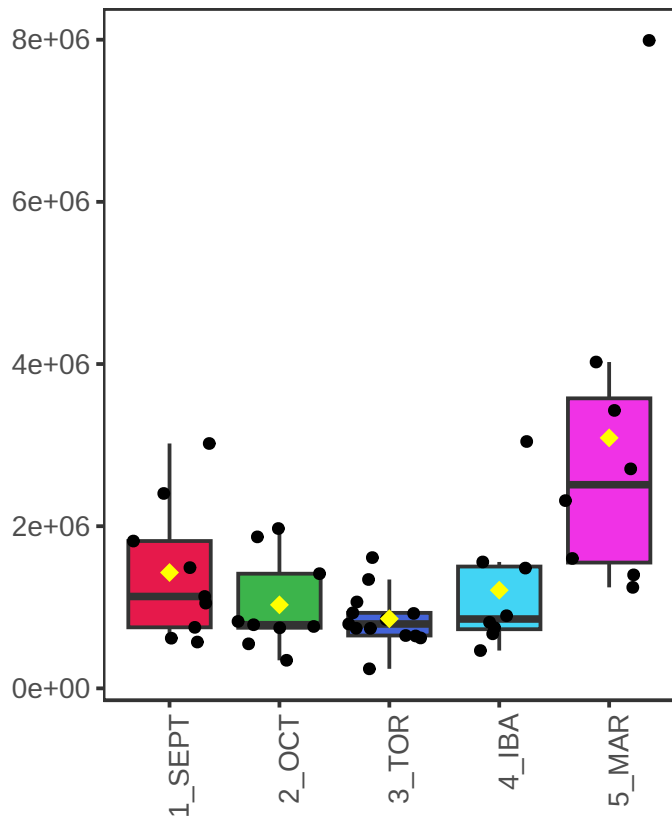

Normalized Conc.

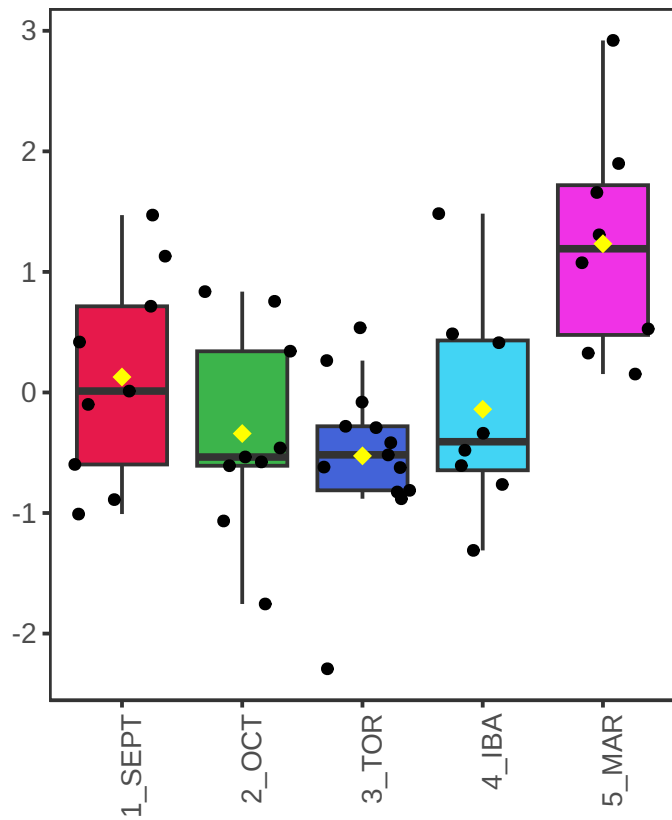

# 2,2,6,6-Tetramethyl-1-piperidinol (TEMPO)

Original Conc.

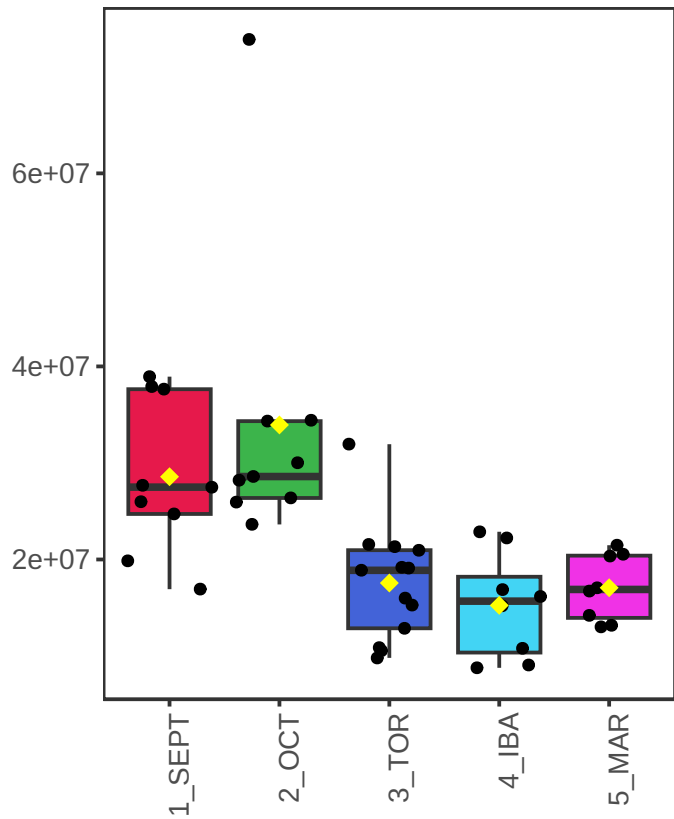

Normalized Conc.

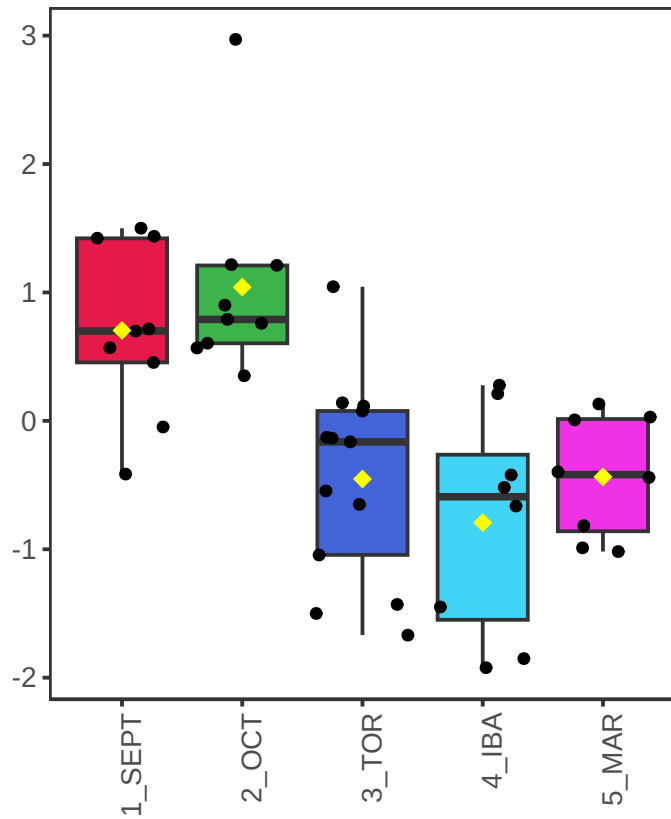

# 1-Aminocyclopropanecarboxylate

Original Conc.

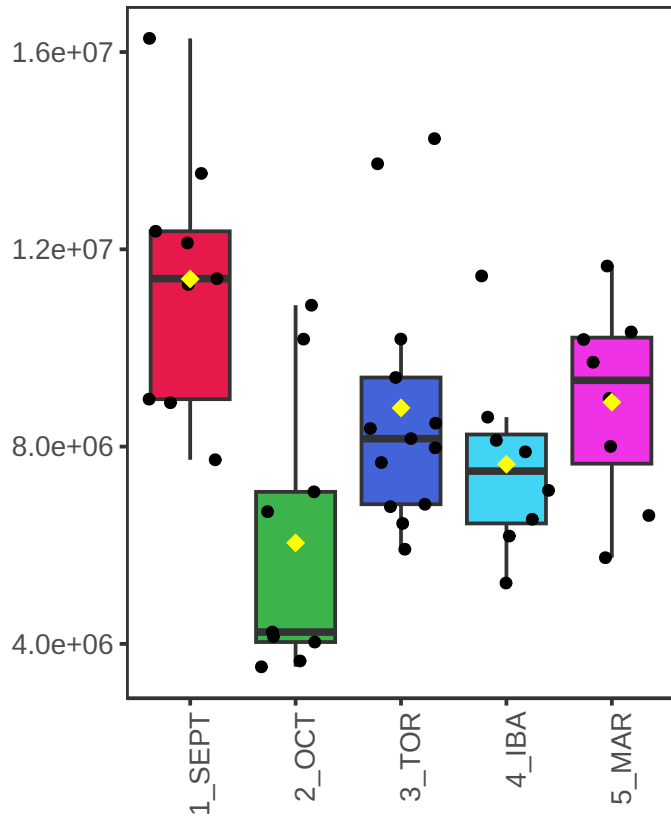

Normalized Conc.

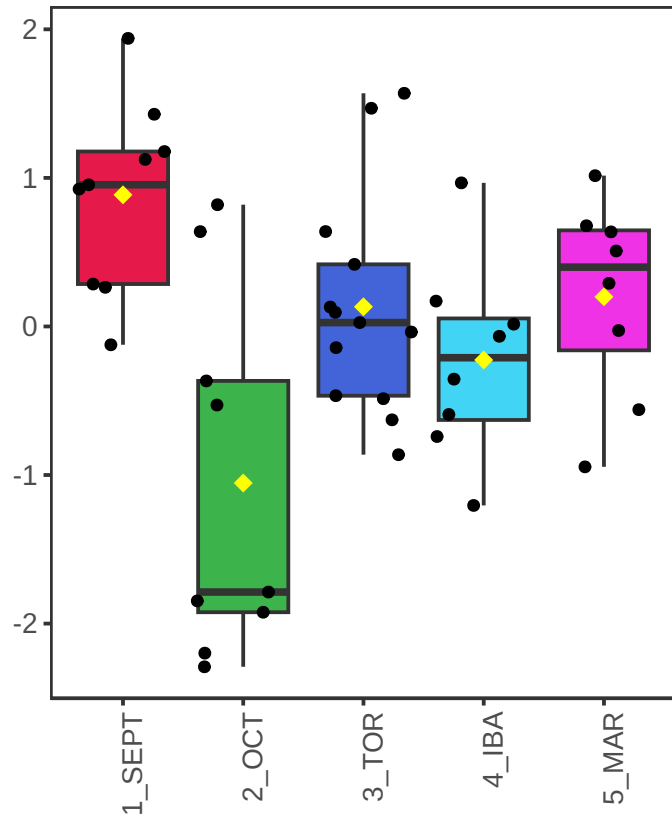



# Acetohydroxamic acid

Original Conc.

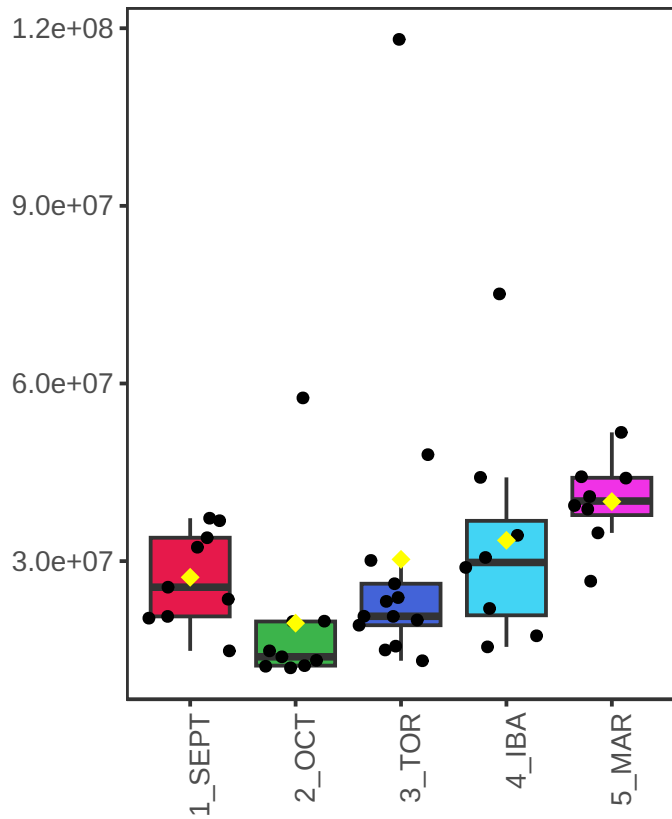

Normalized Conc.

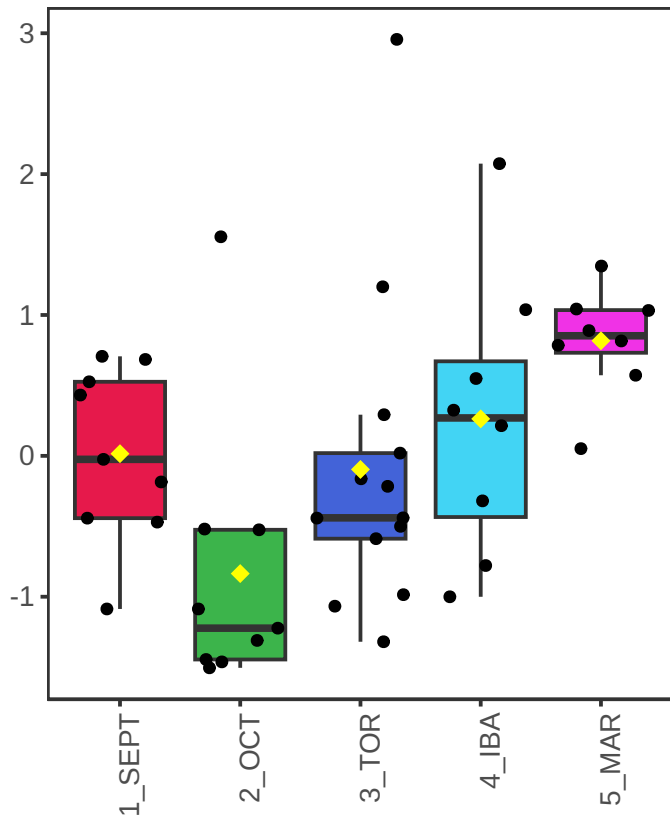

# Acetylarginine

Original Conc.

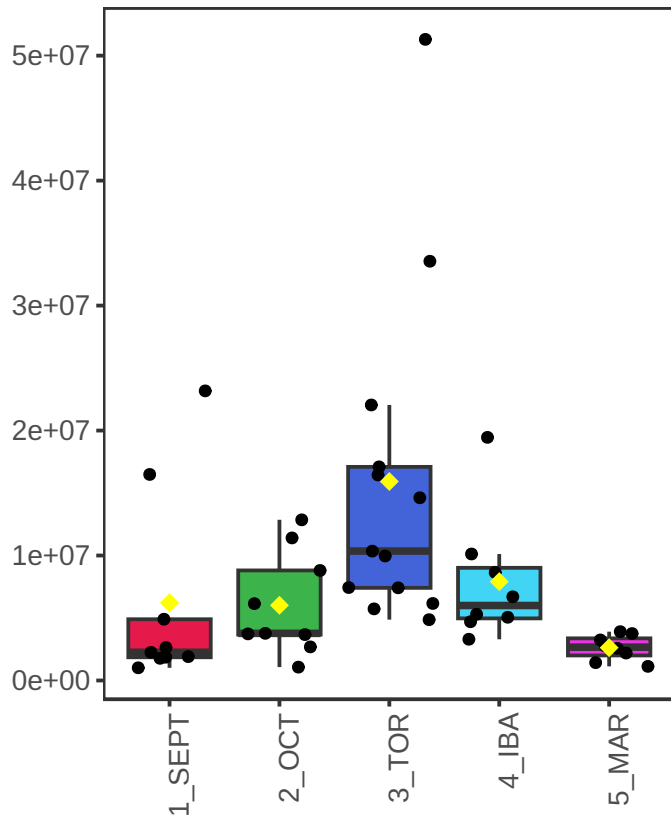

Normalized Conc.

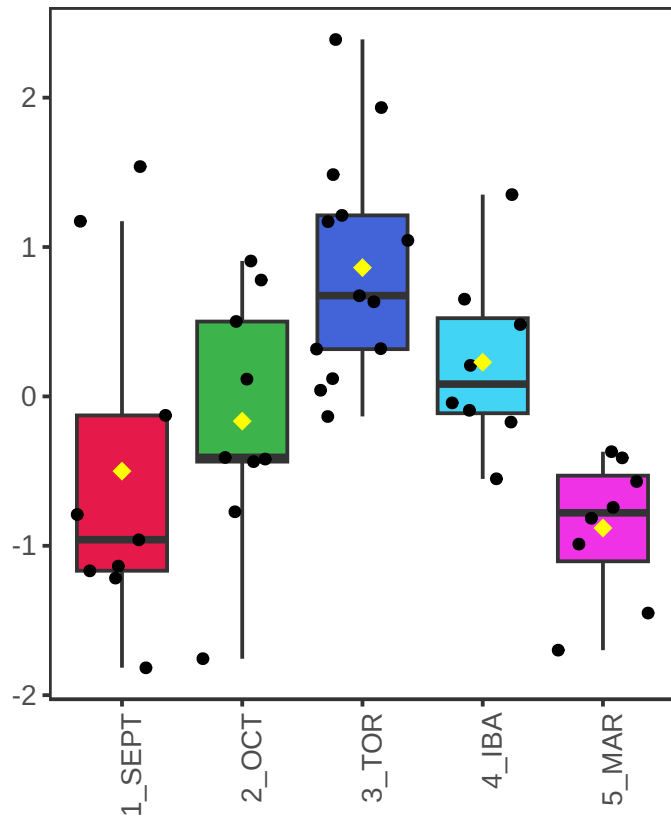

# Acetylcarnitine

Original Conc.

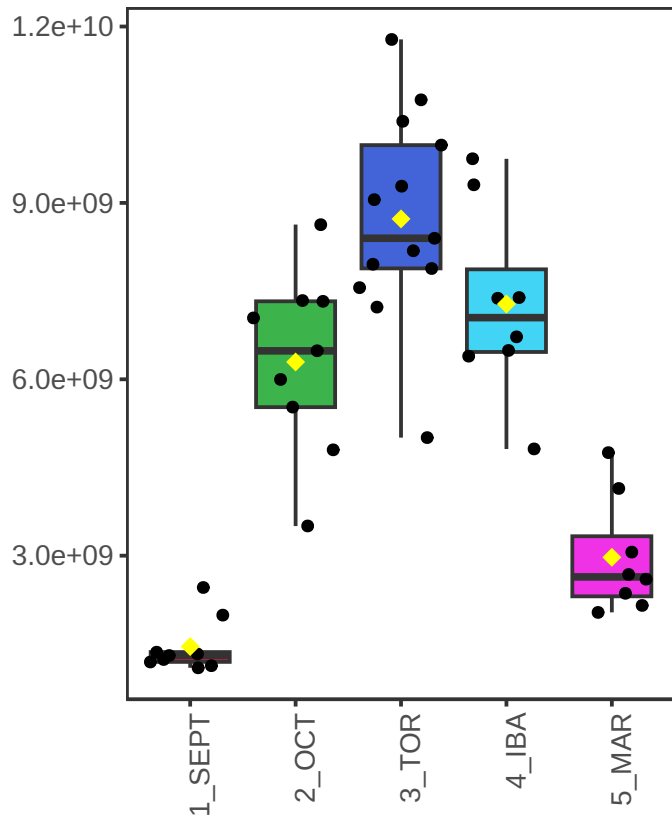

Normalized Conc.

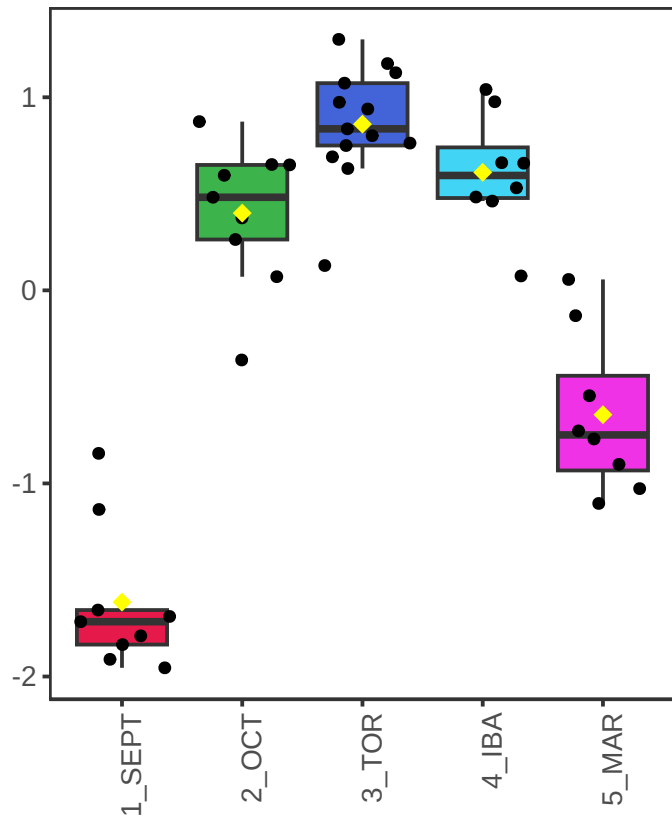

# Acetylcholine

Original Conc.

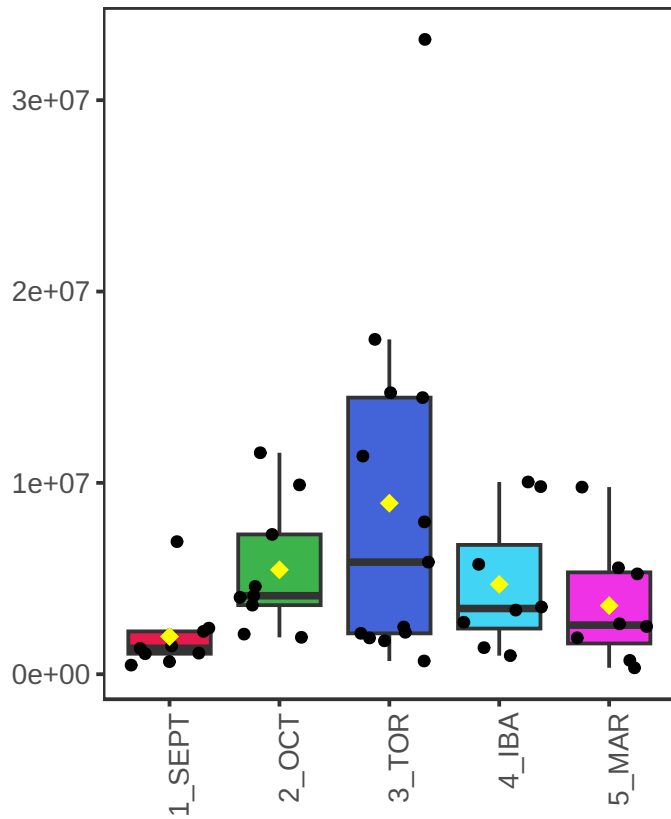

Normalized Conc.

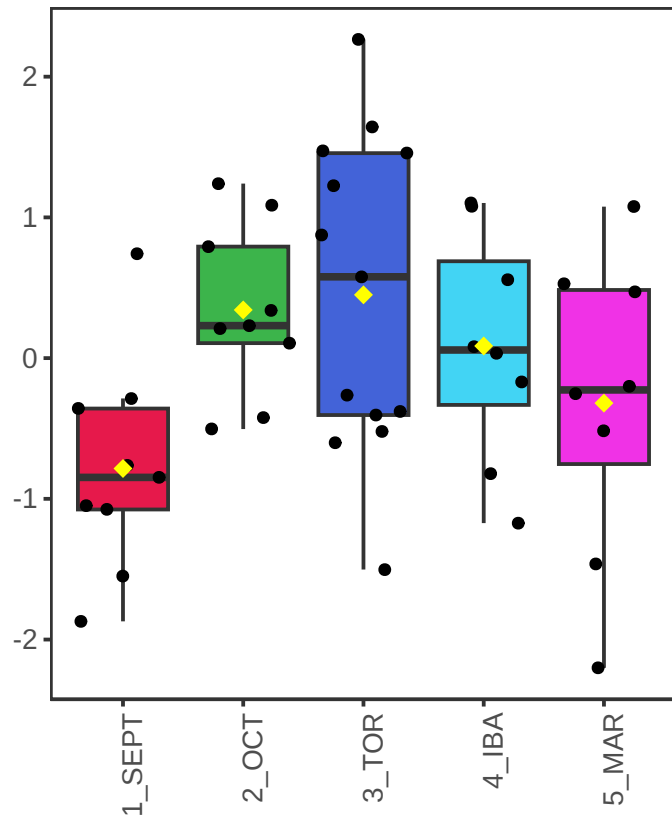

# Acetylproline

Original Conc.

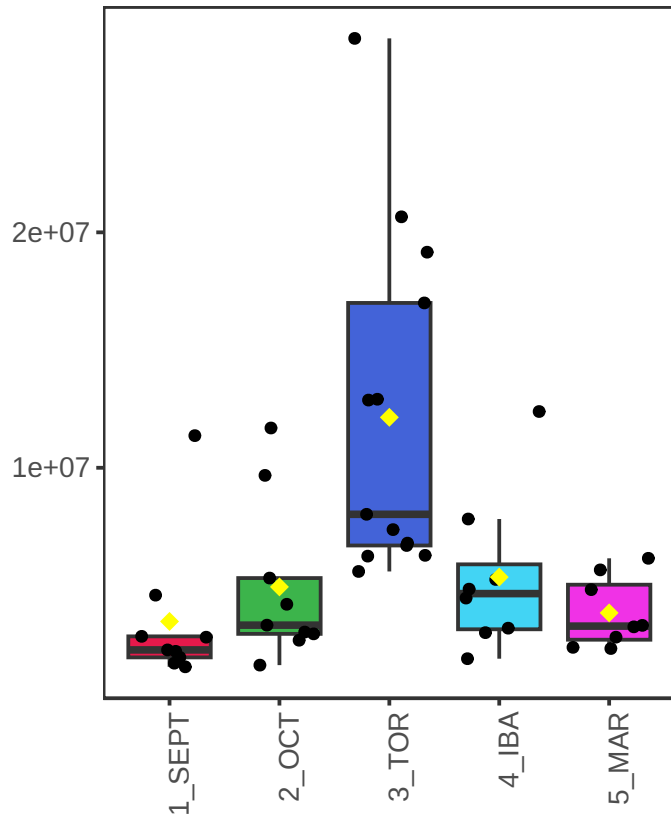

Normalized Conc.

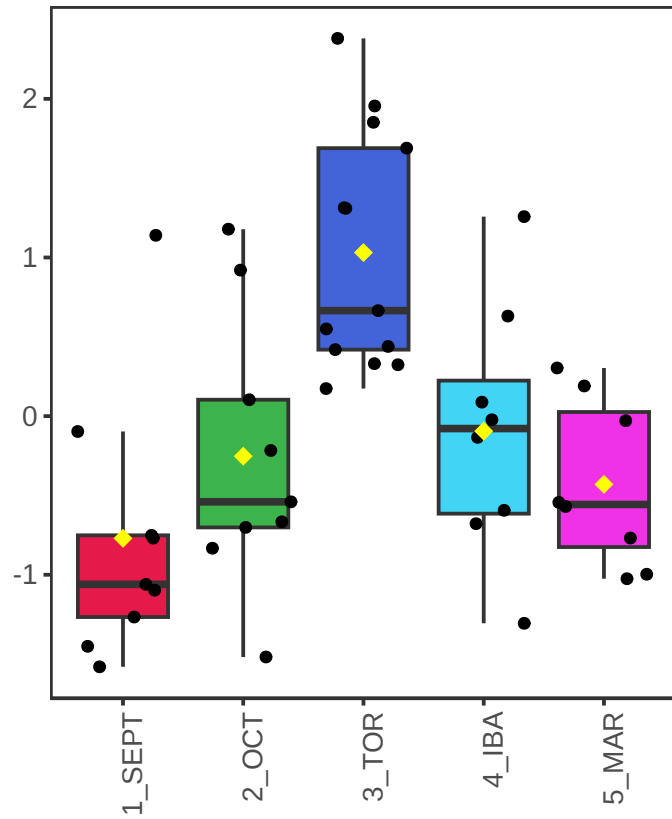

# Adenine

Original Conc.

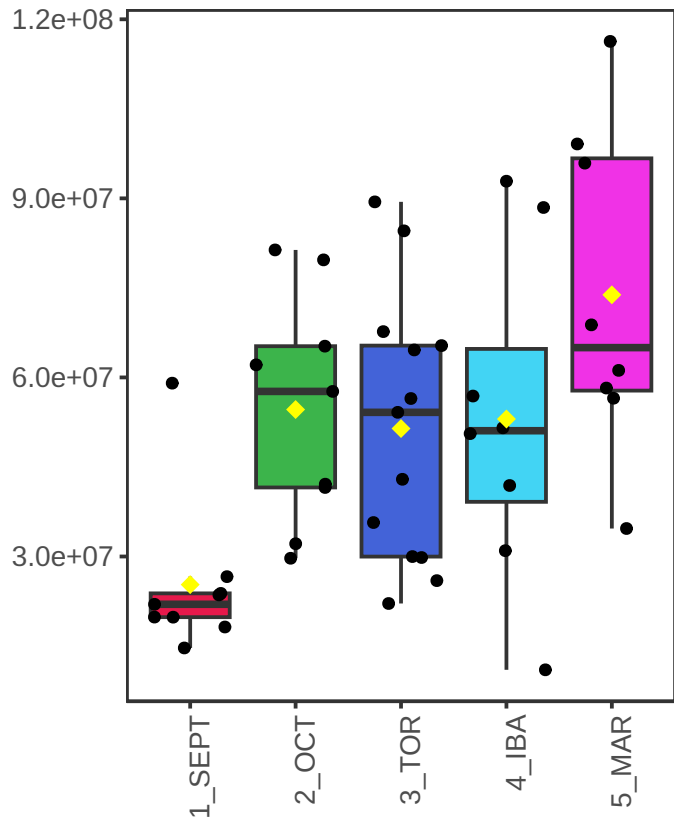

Normalized Conc.

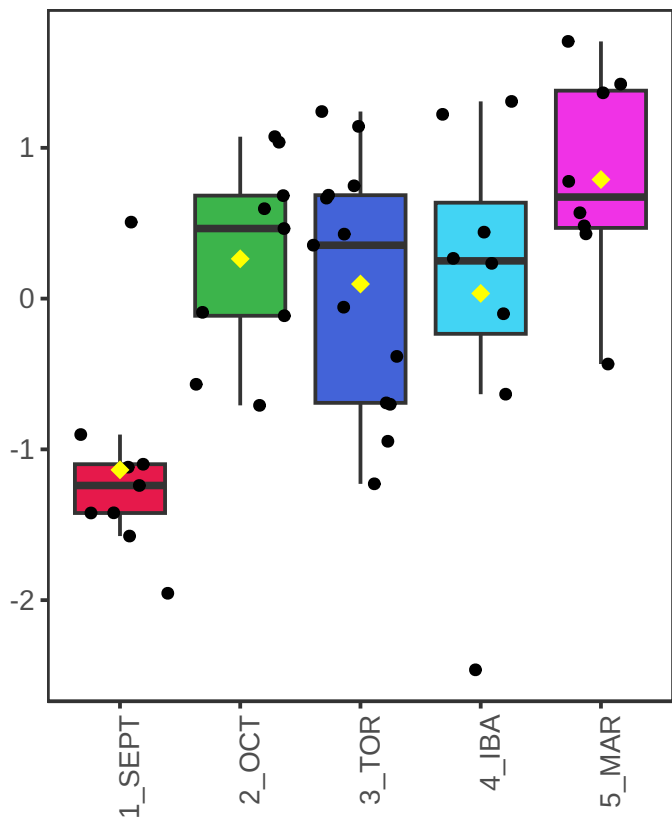

# Adenosine

## Original Conc.

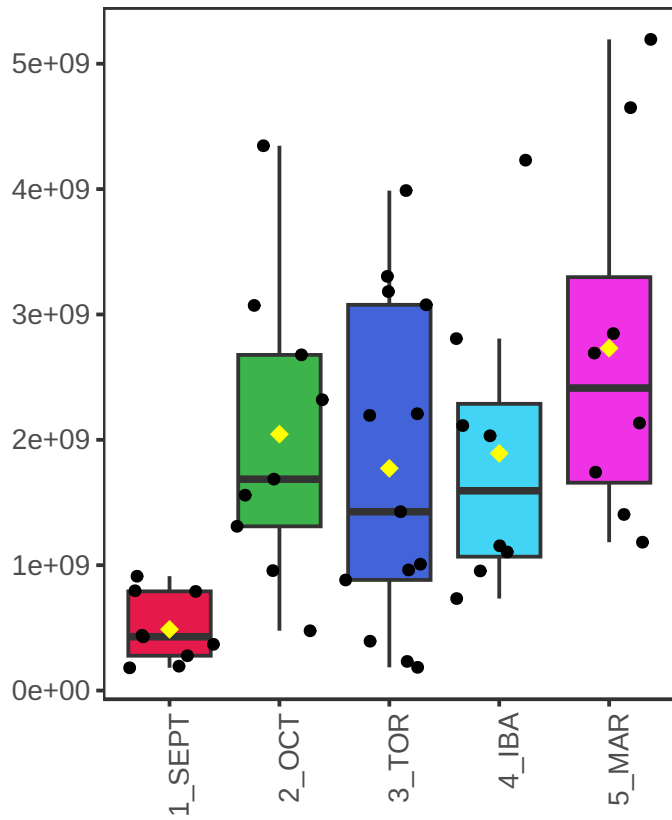

## Normalized Conc.

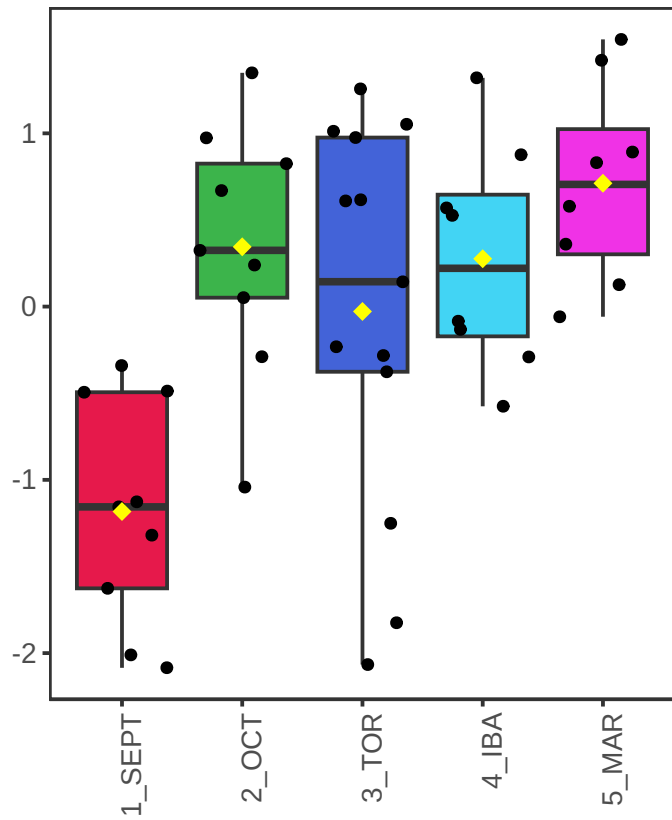

# Adenosine 5'-monophosphate

Original Conc.

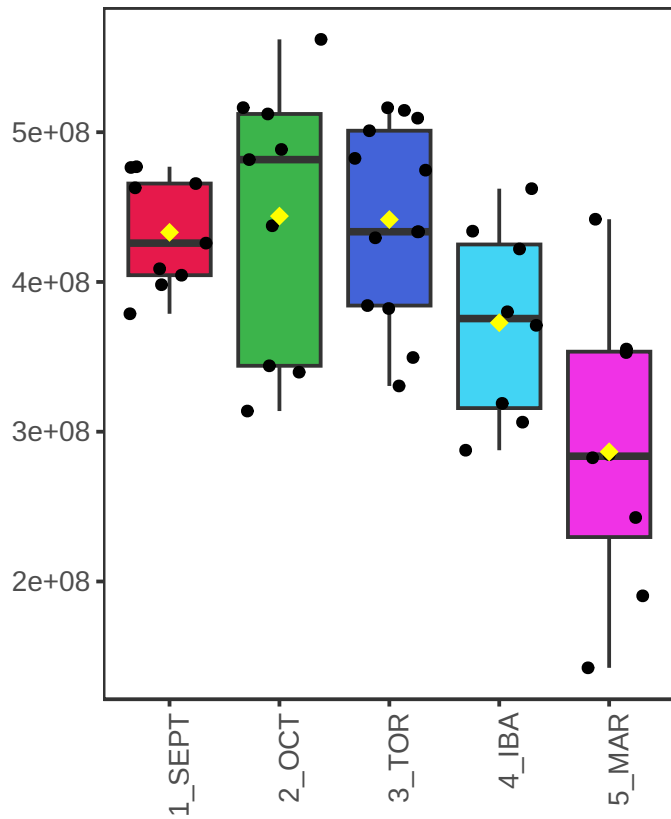

Normalized Conc.

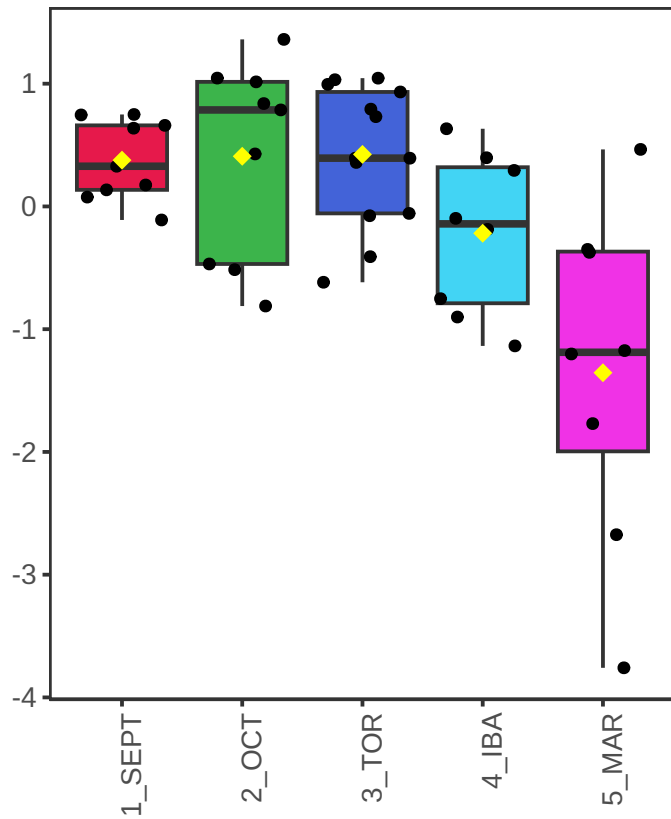



# alpha-Glycerolphosphorylcholine

Original Conc.

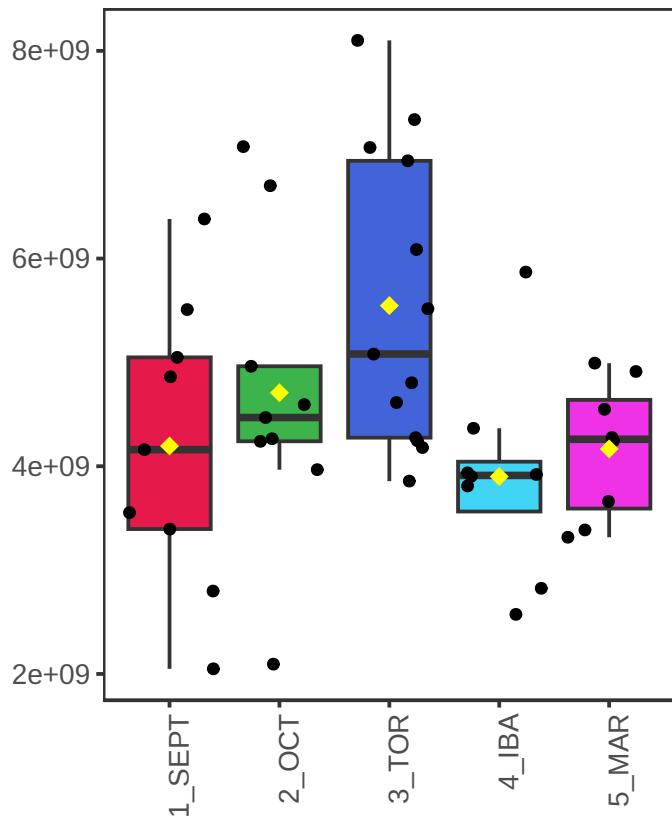

Normalized Conc.

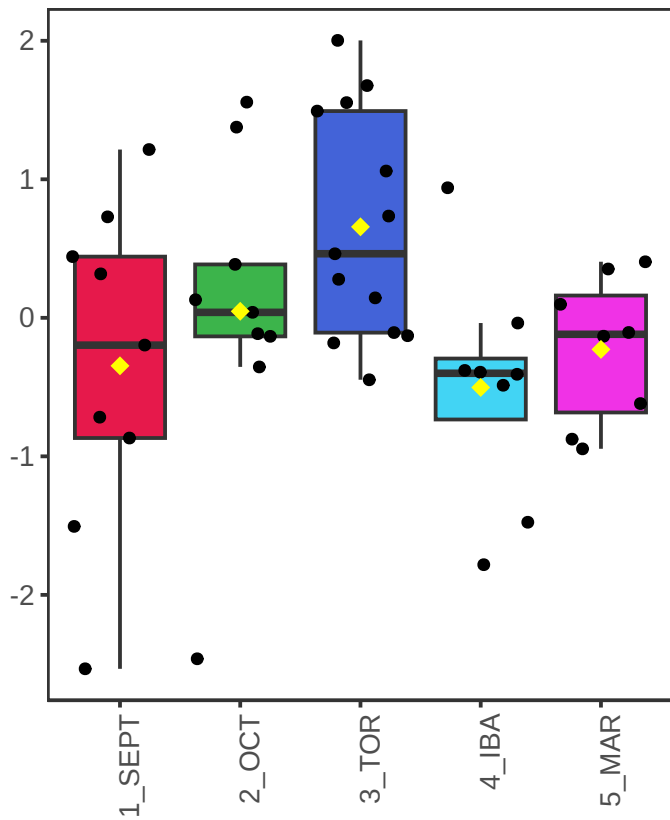

# Anthranilic acid

Original Conc.

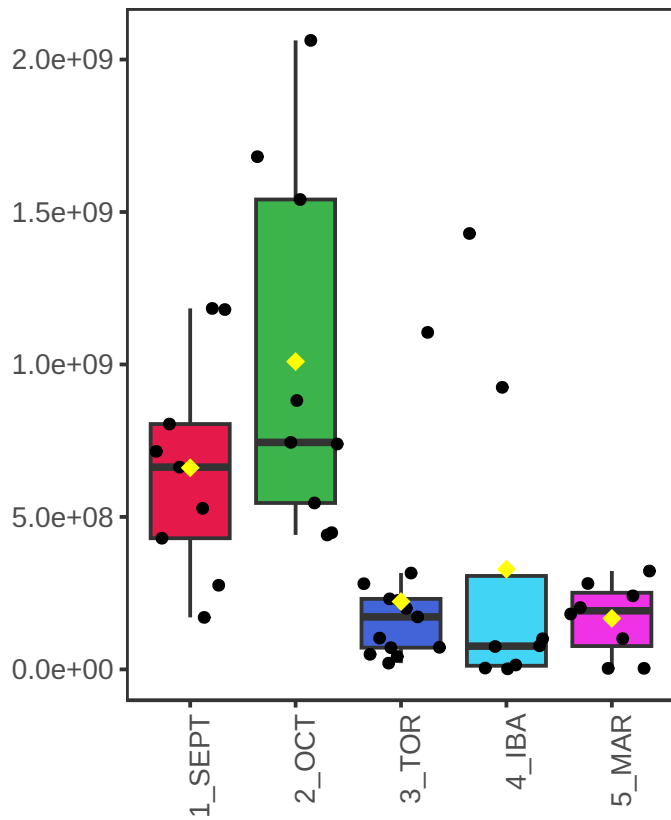

Normalized Conc.

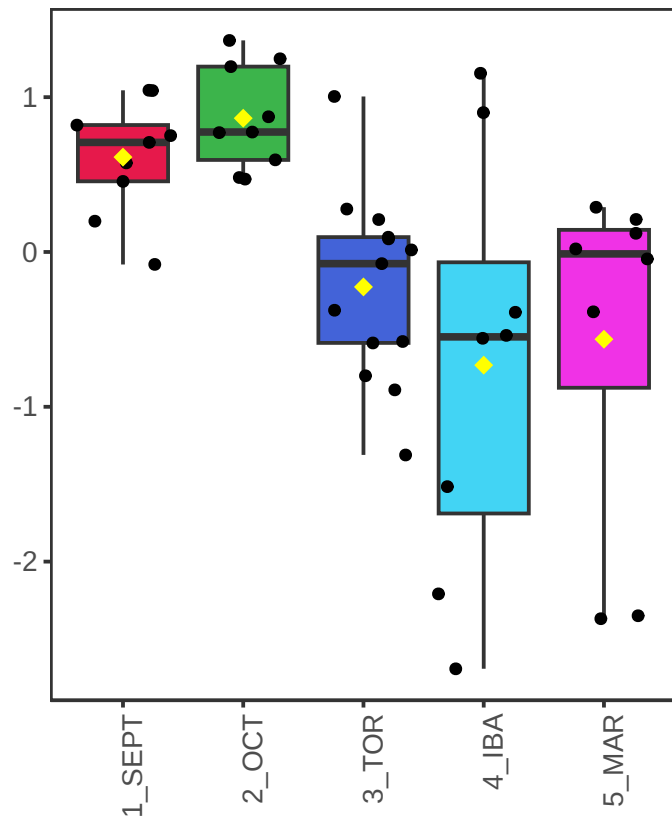

# Argininosuccinic acid

Original Conc.

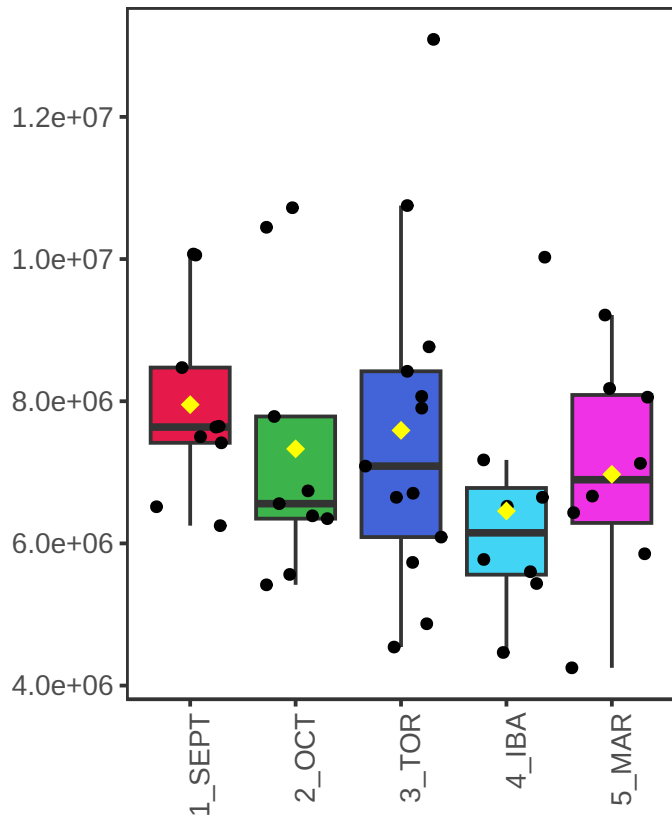

Normalized Conc.

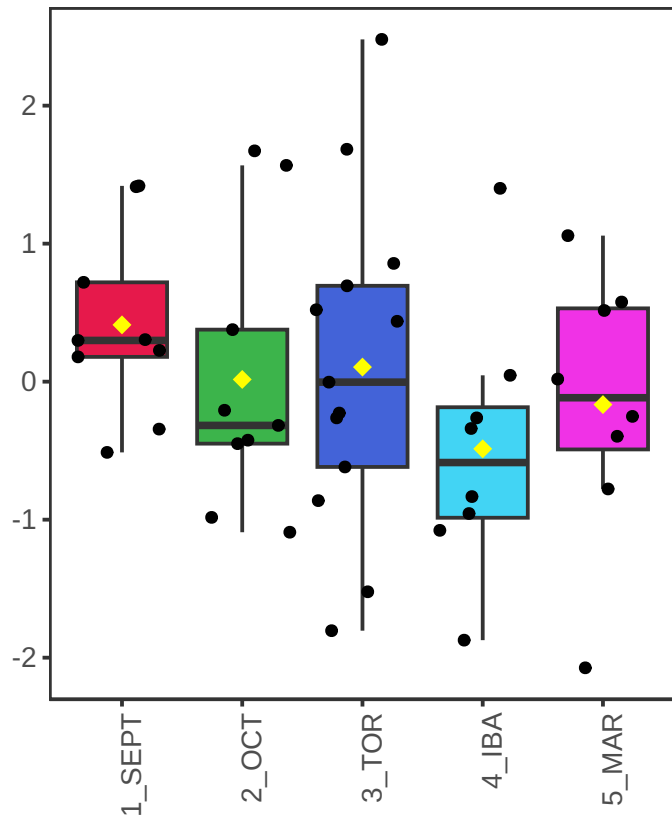

# Ascorbate

Original Conc.

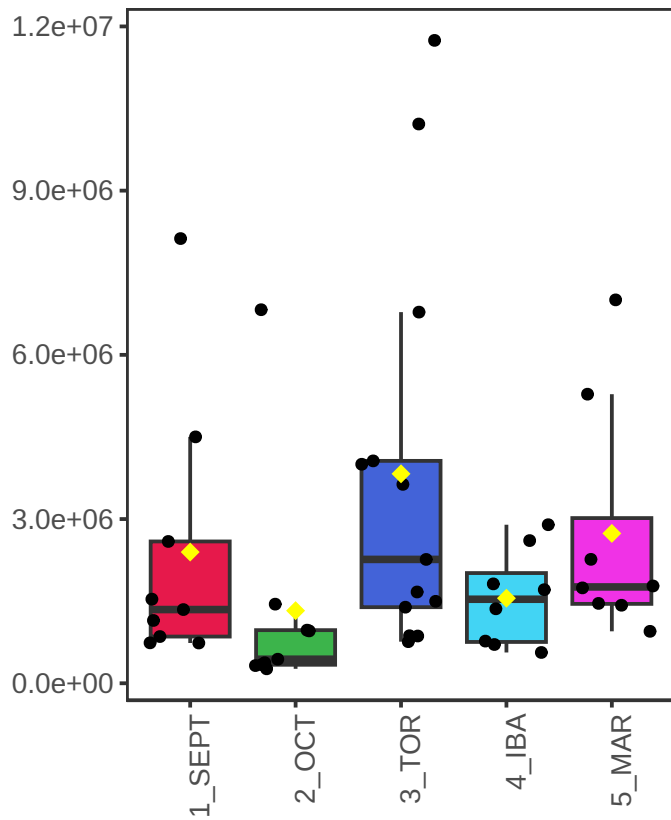

Normalized Conc.

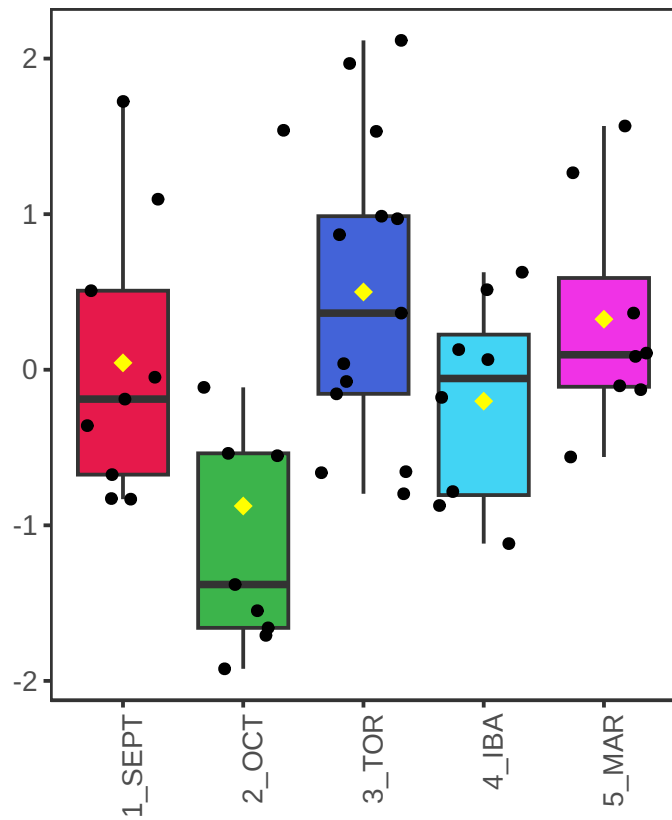

# Asparagine

Original Conc.

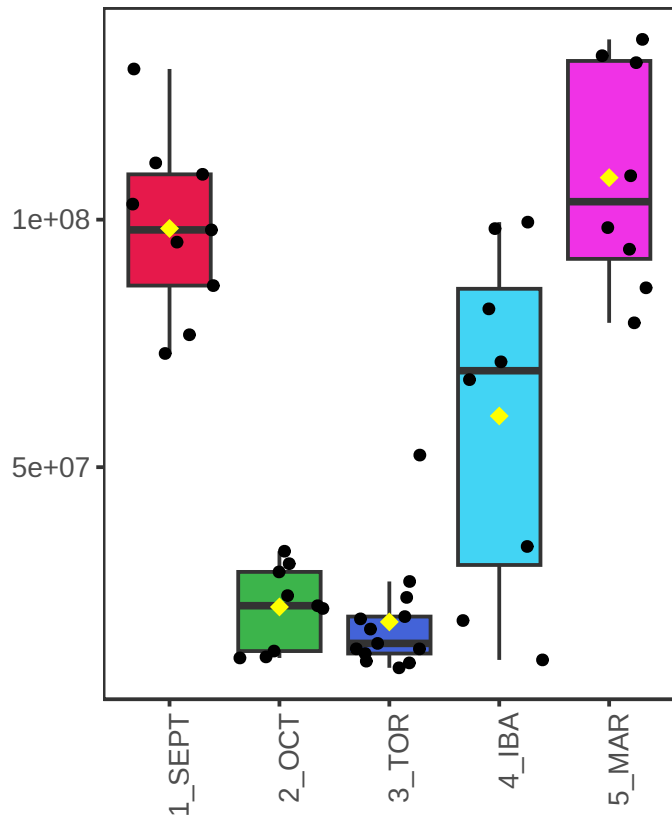

Normalized Conc.

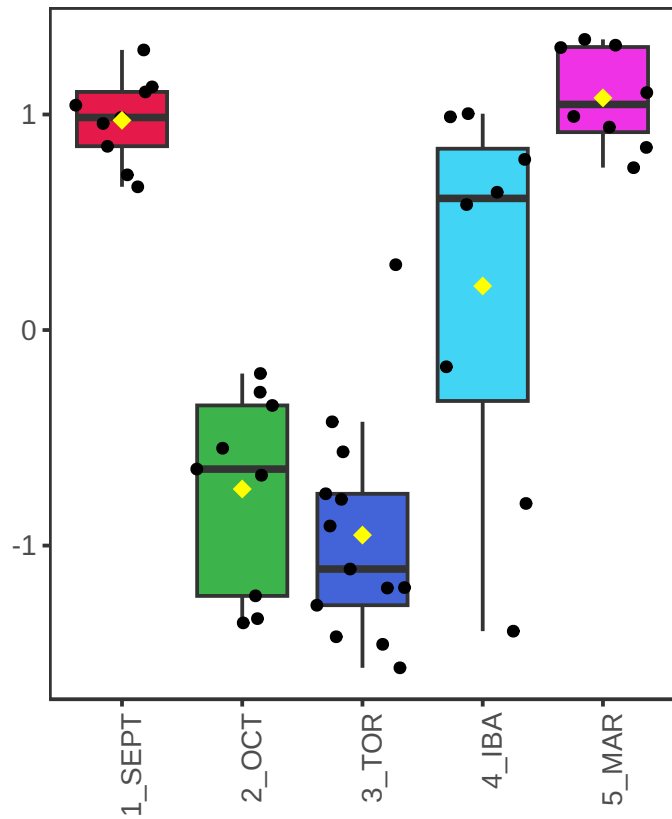

# Aspartic acid

Original Conc.

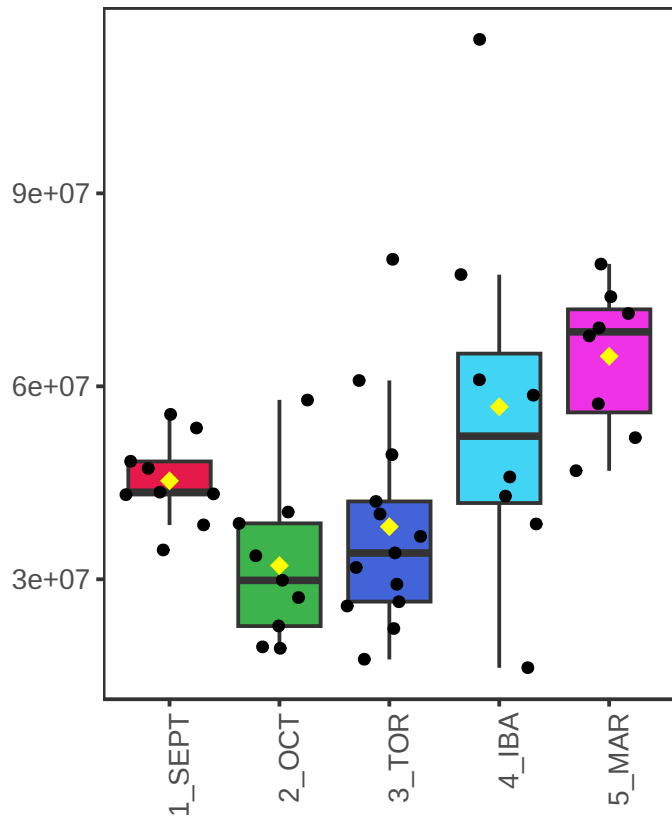

Normalized Conc.

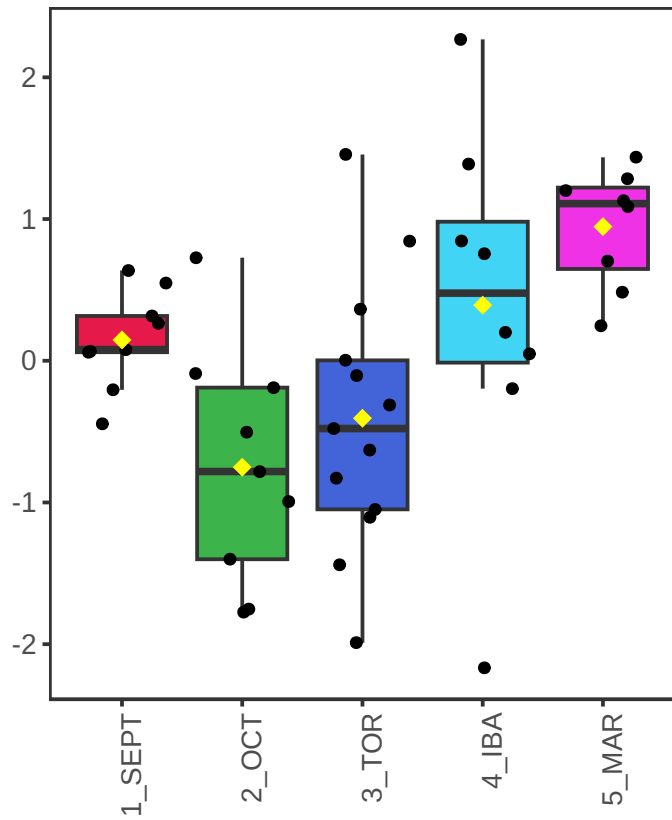

# Asp-lys

Original Conc.

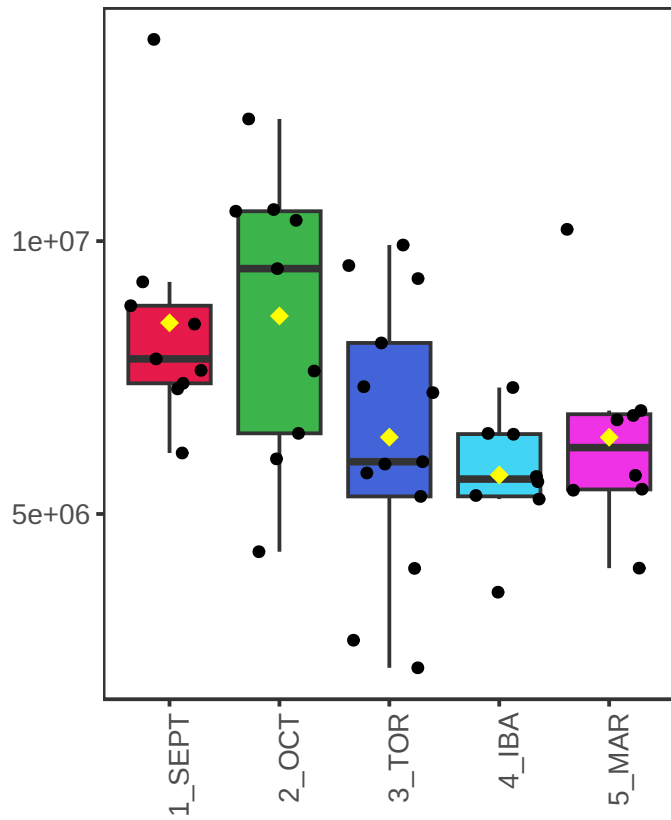

Normalized Conc.

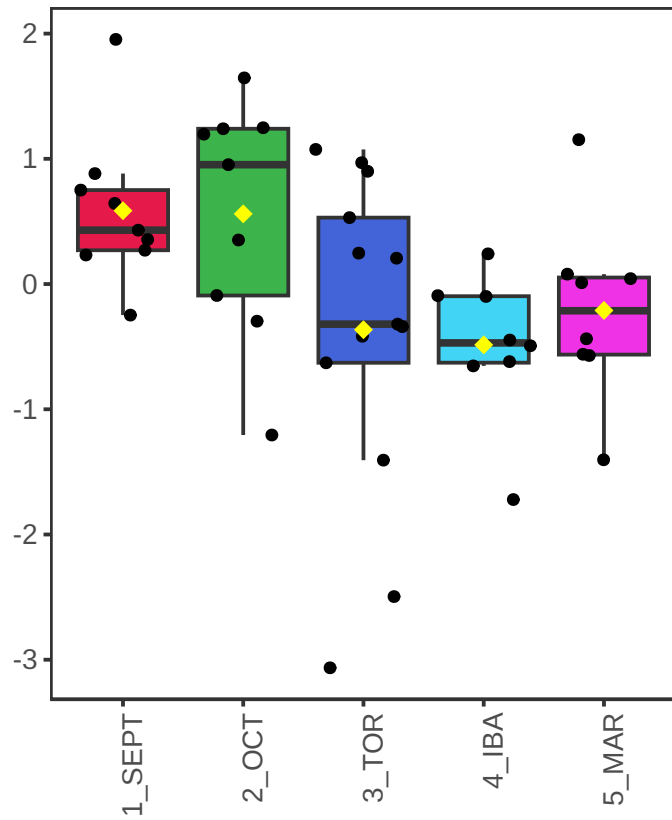

# Australine

## Original Conc.

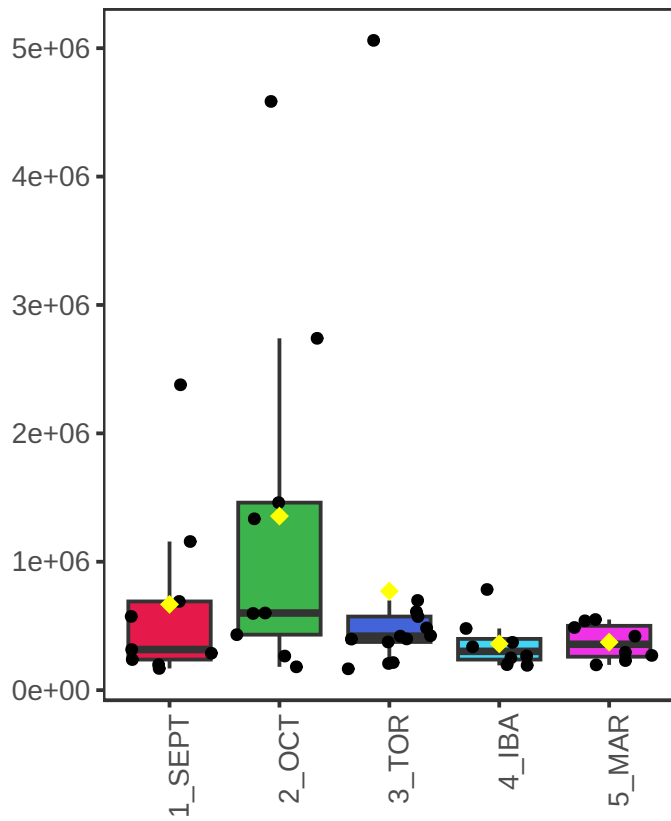

## Normalized Conc.

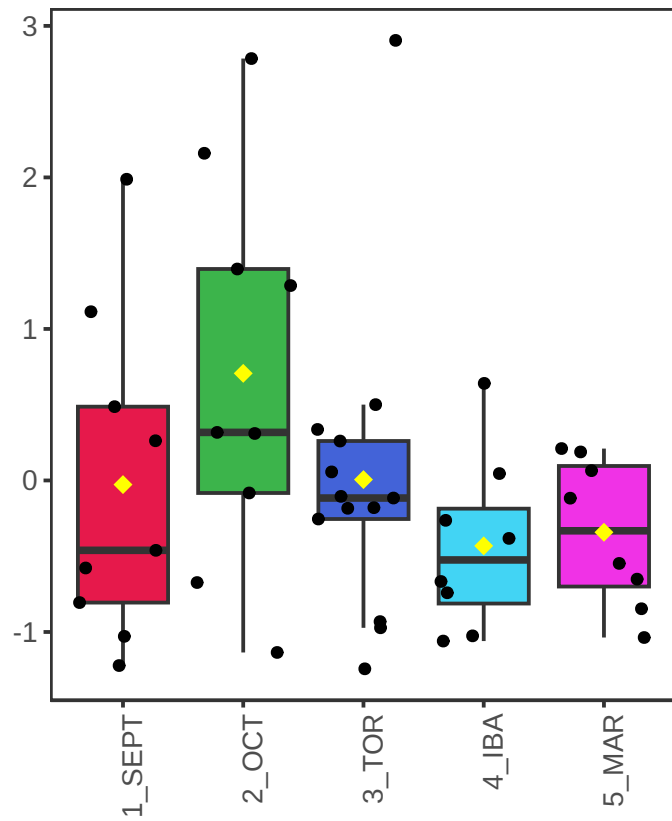



# Betaine

Original Conc.

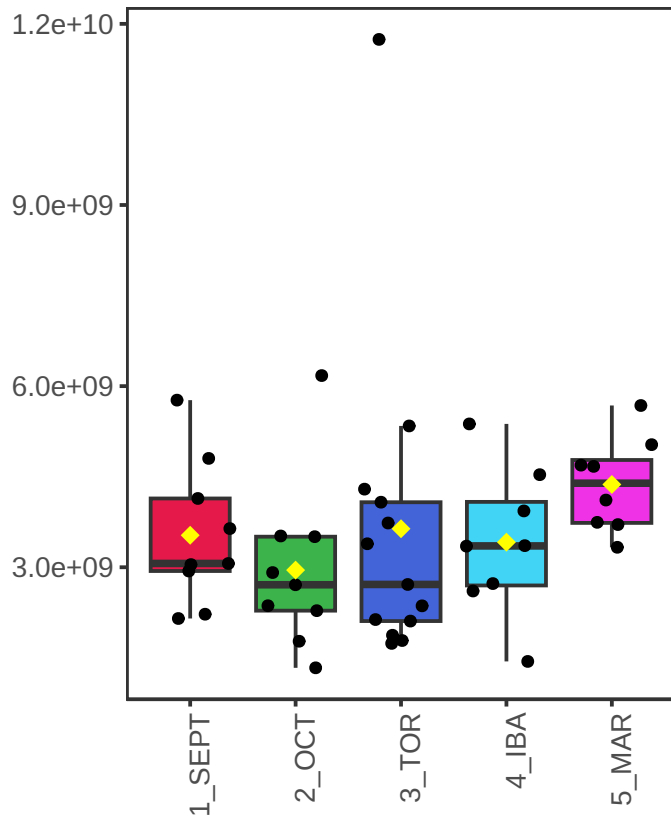

Normalized Conc.

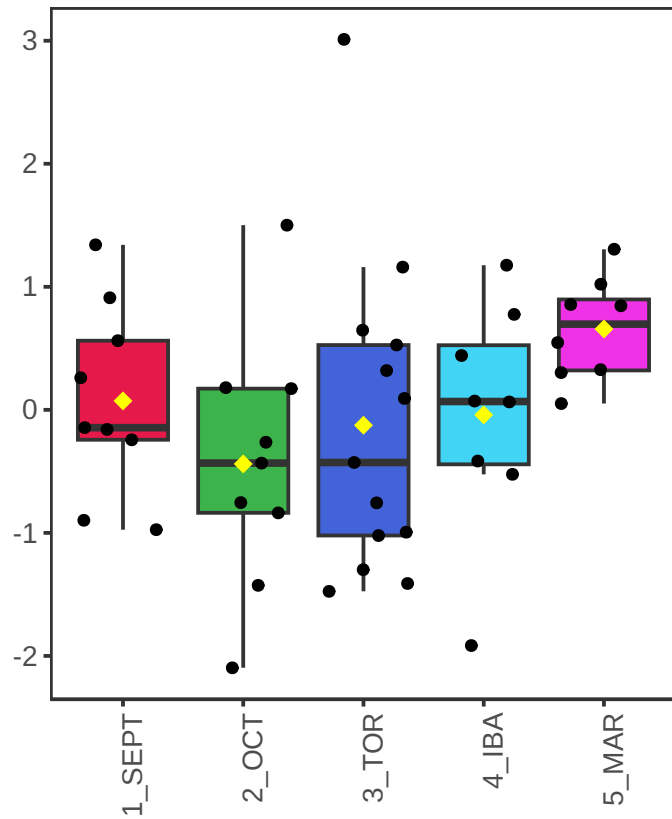

# Biotinamide

Original Conc.

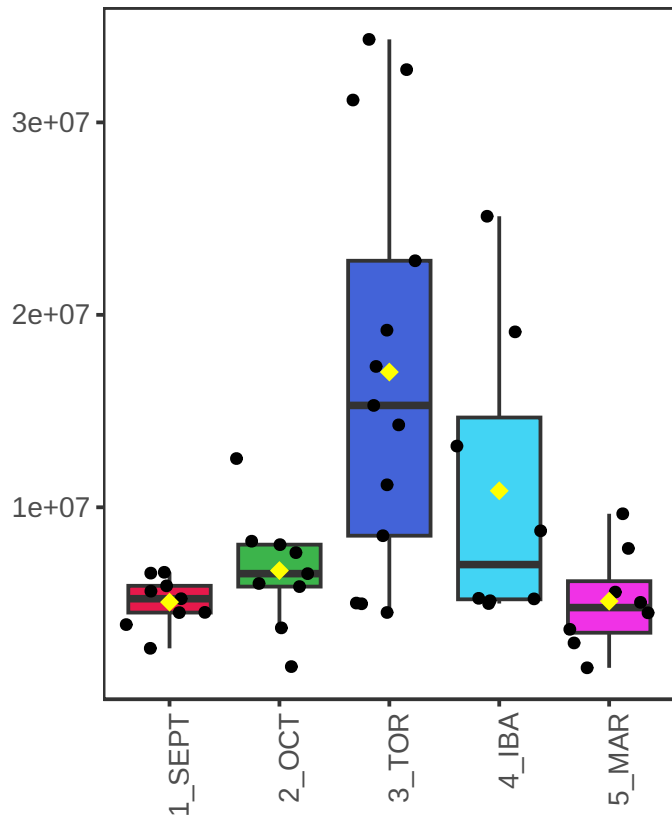

Normalized Conc.

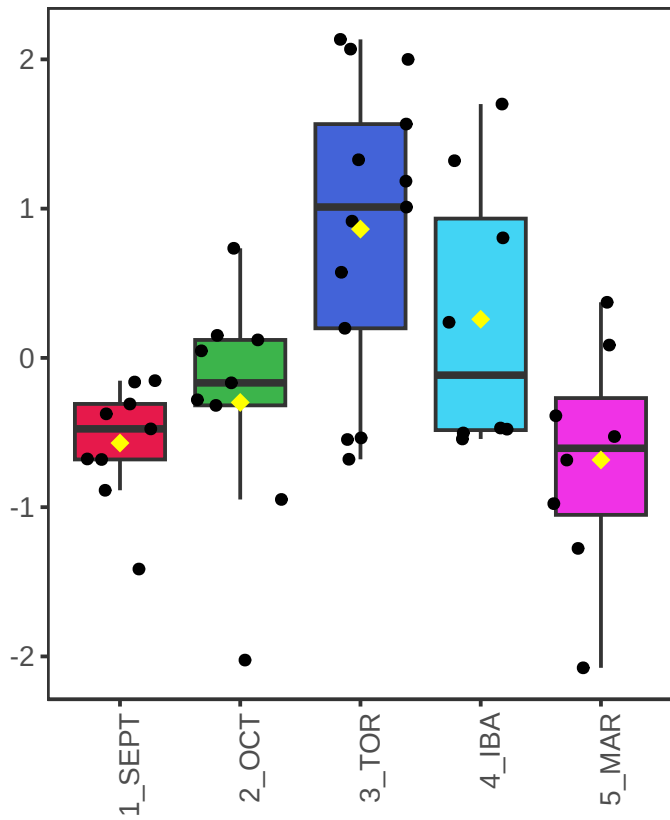

# Butyric acid

Original Conc.

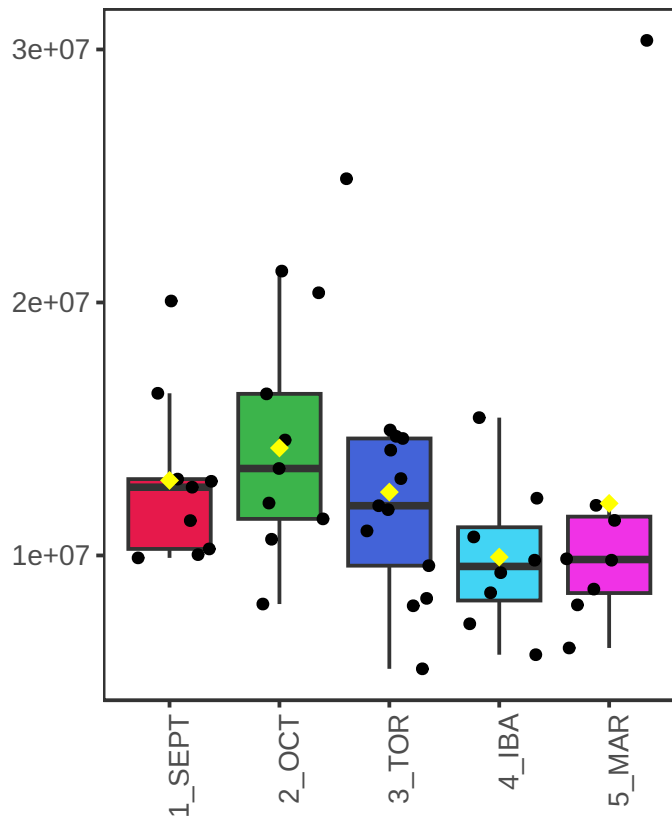

Normalized Conc.

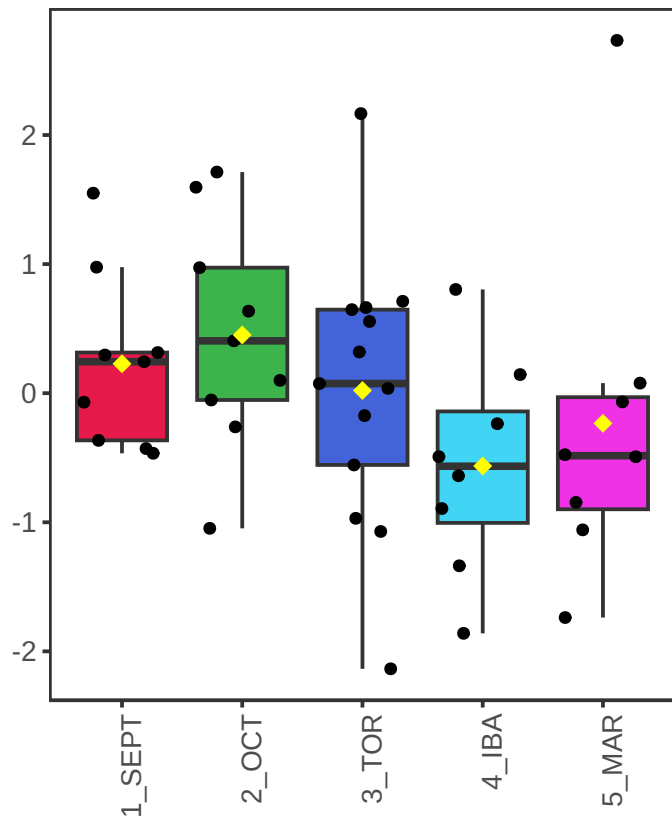

# Butyryl-homoserine lactone

Original Conc.

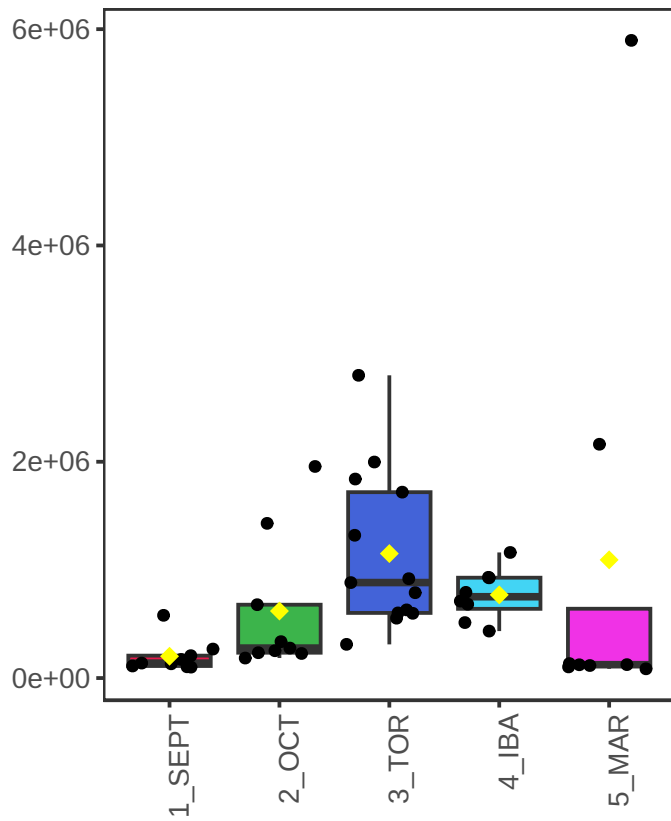

Normalized Conc.

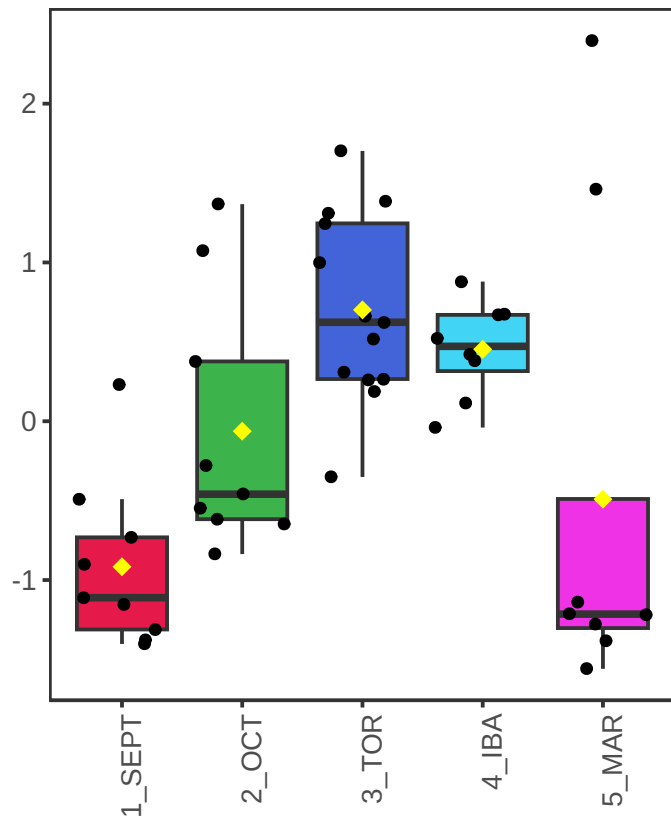

# Caprolactam

Original Conc.

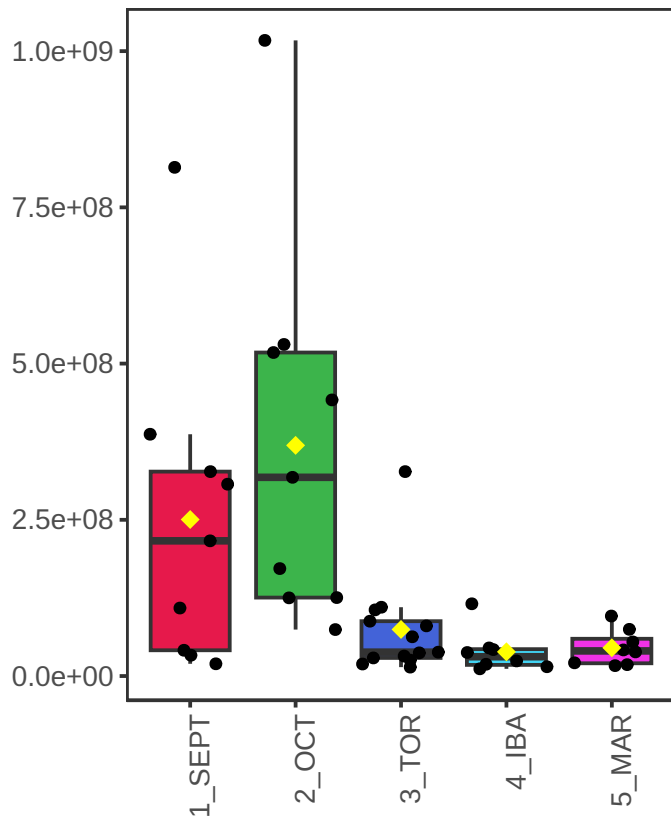

Normalized Conc.

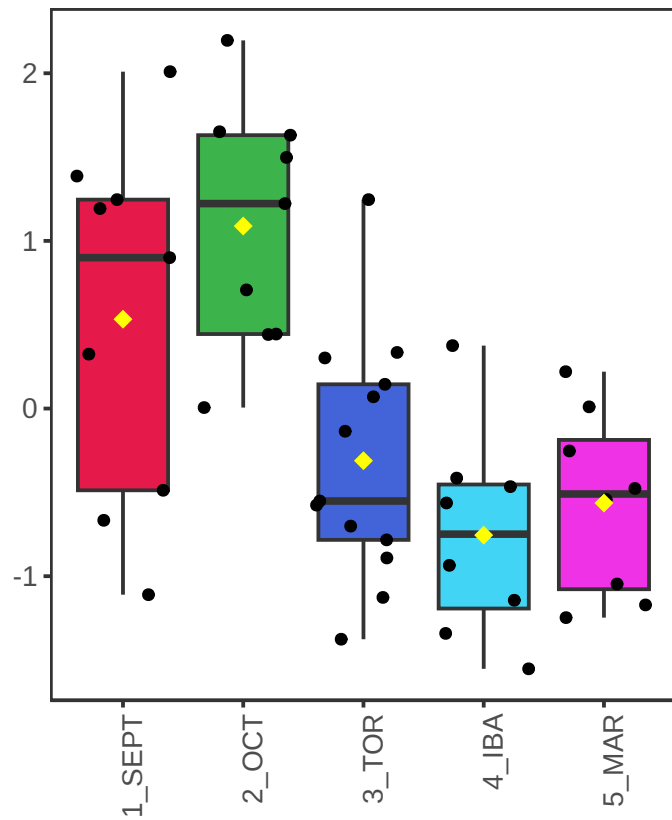

# Carnitine

Original Conc.

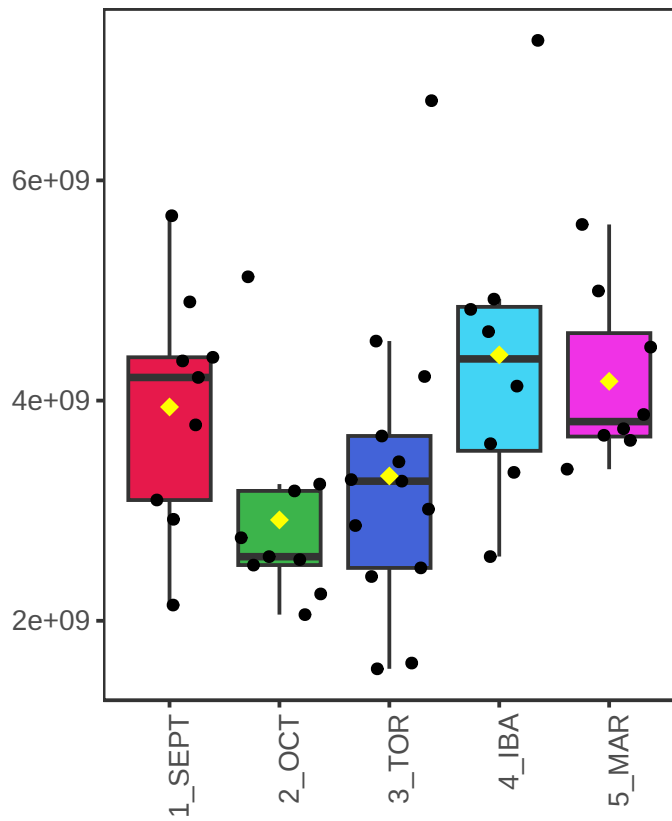

Normalized Conc.

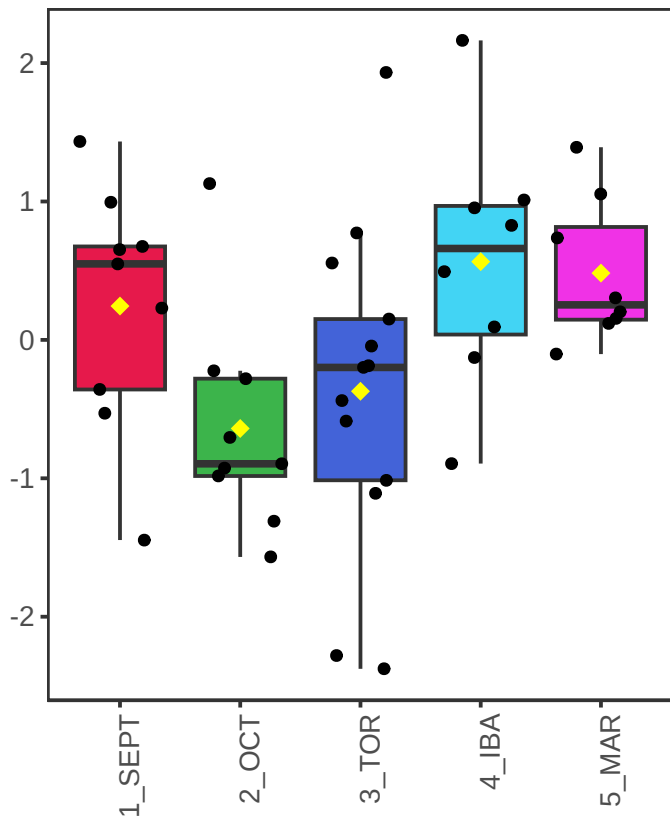

# Carnosine

Original Conc.

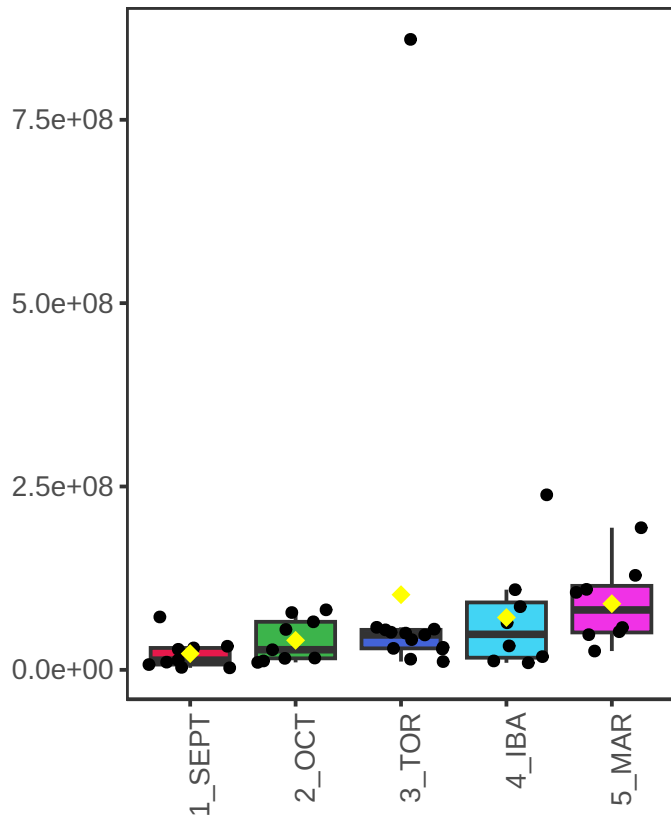

Normalized Conc.

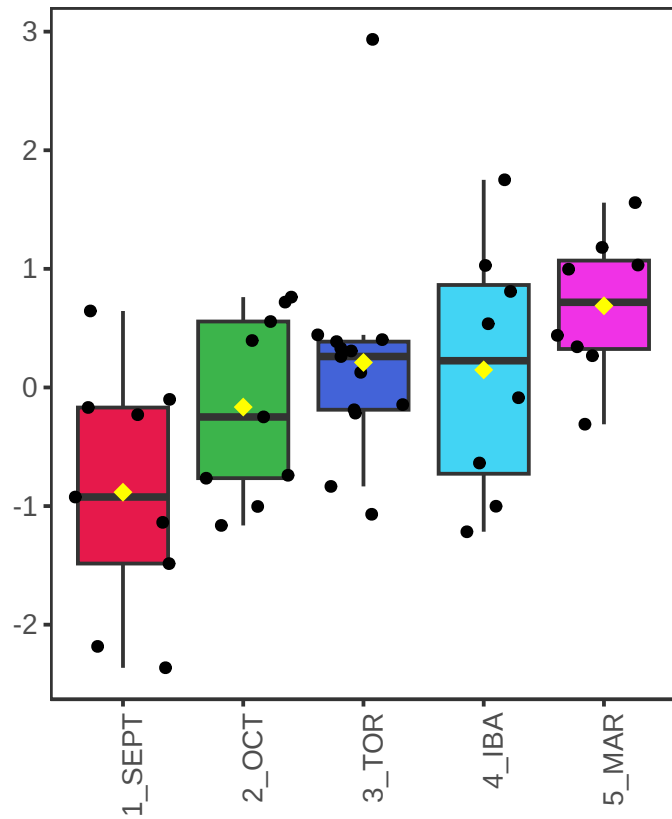

# CDP-ethanolamine

Original Conc.

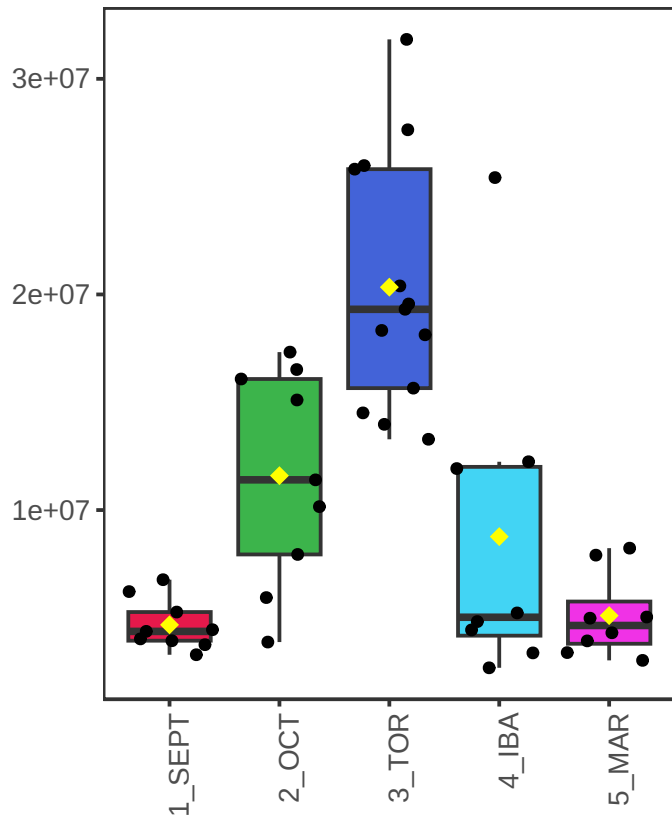

Normalized Conc.

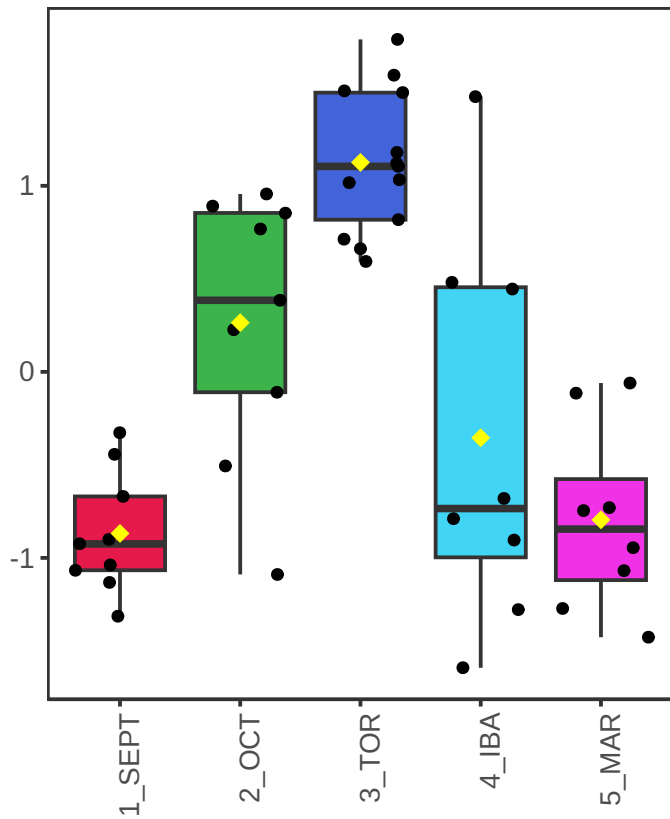



# Choline

Original Conc.

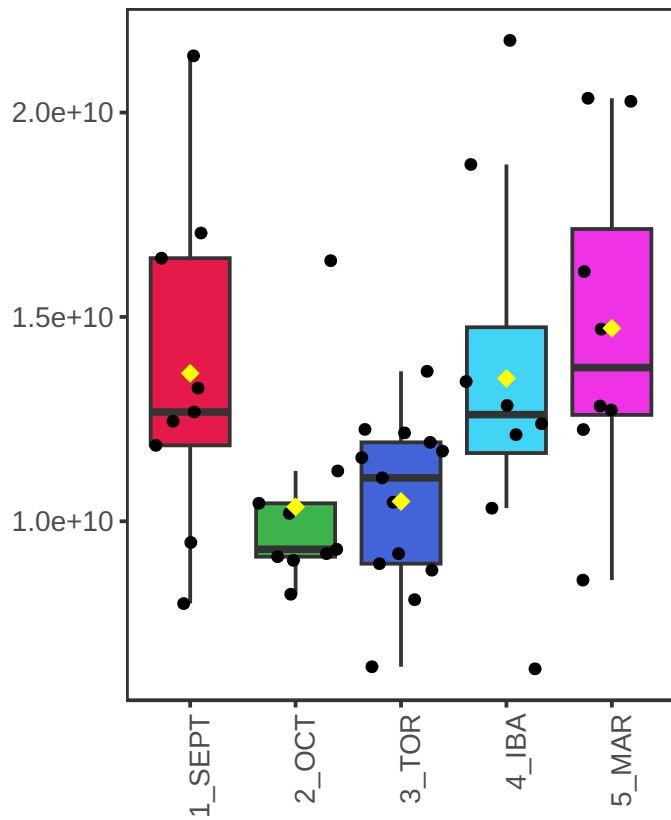

Normalized Conc.

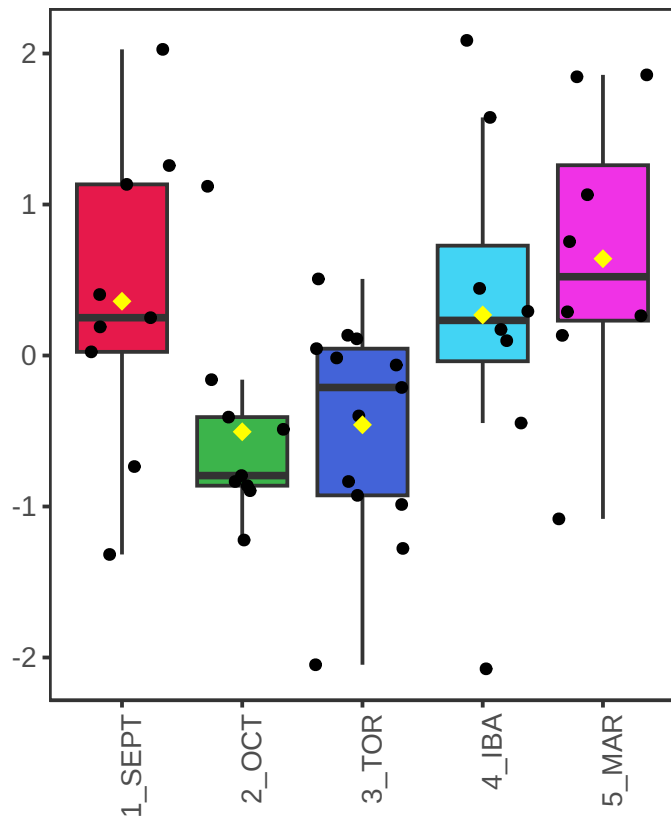

# Choline O-Sulfate

Original Conc.

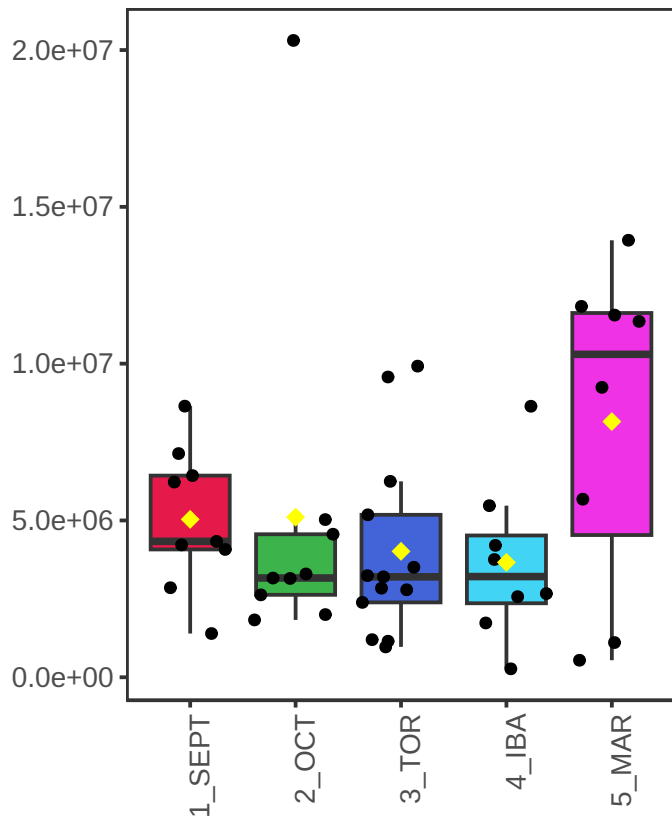

Normalized Conc.

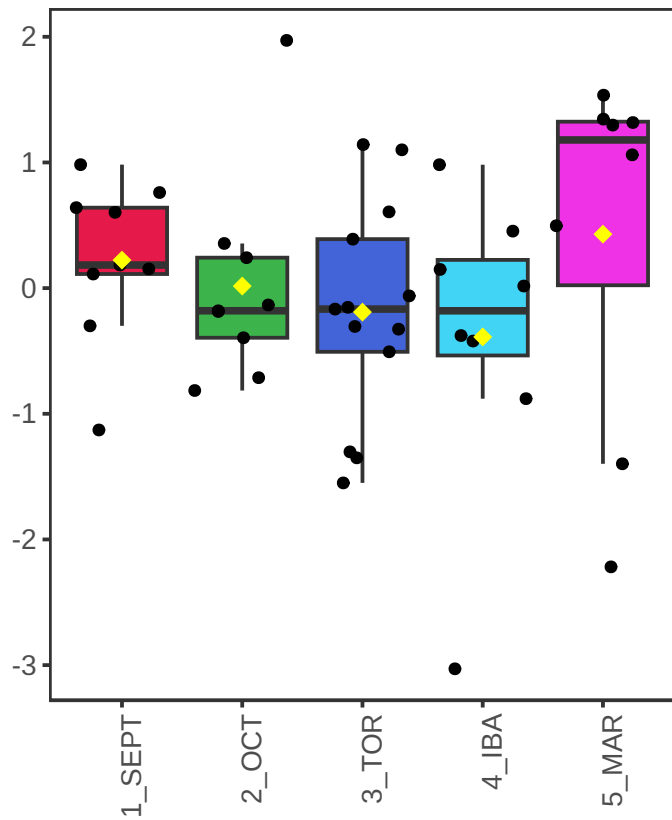

# Citrulline

## Original Conc.

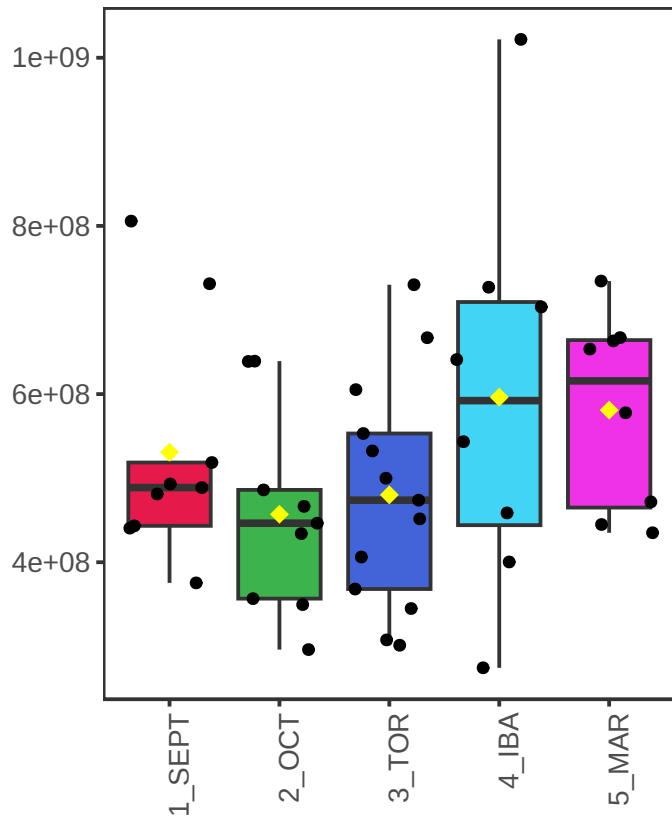

## Normalized Conc.

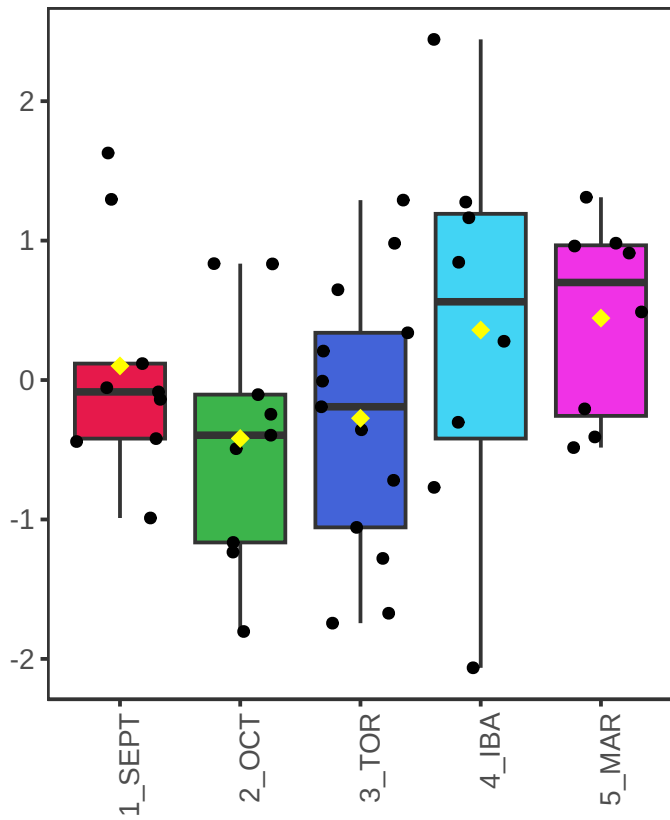

# Creatine

## Original Conc.

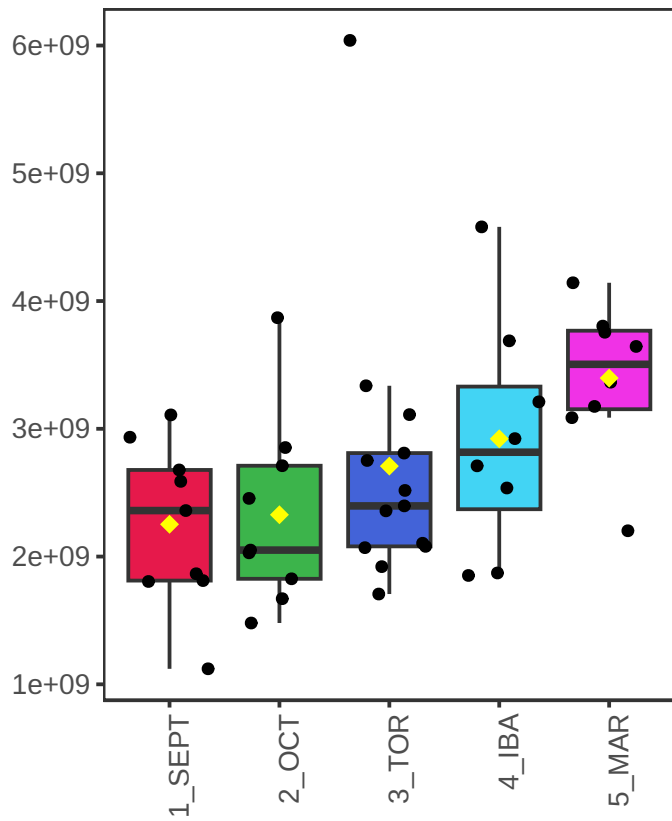

## Normalized Conc.

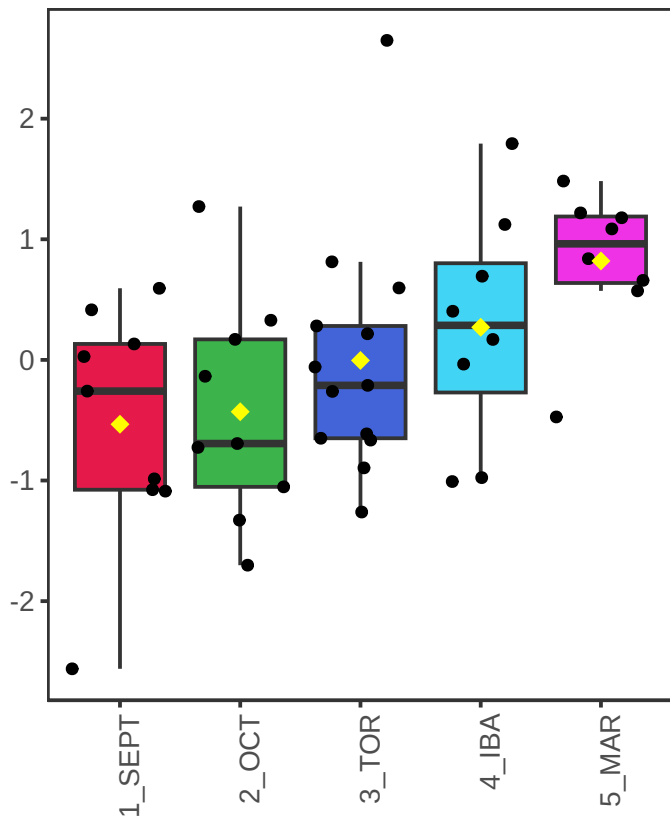

# Creatinine

## Original Conc.

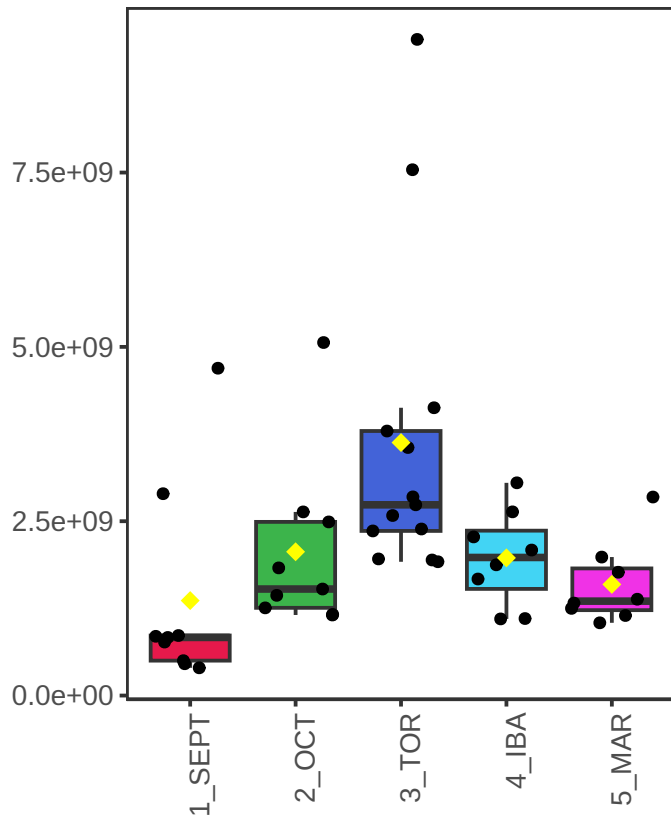

## Normalized Conc.

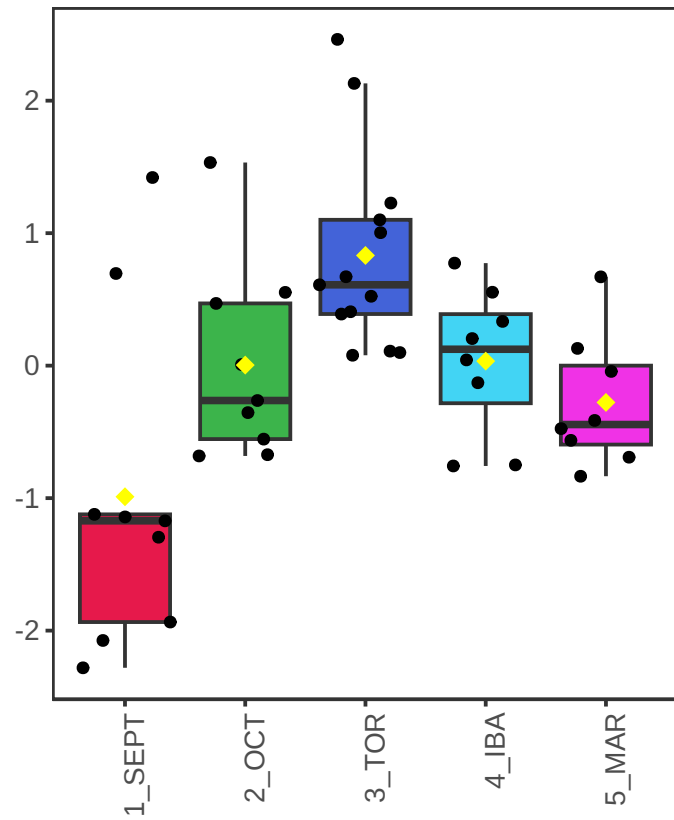

# Crotonic acid

Original Conc.

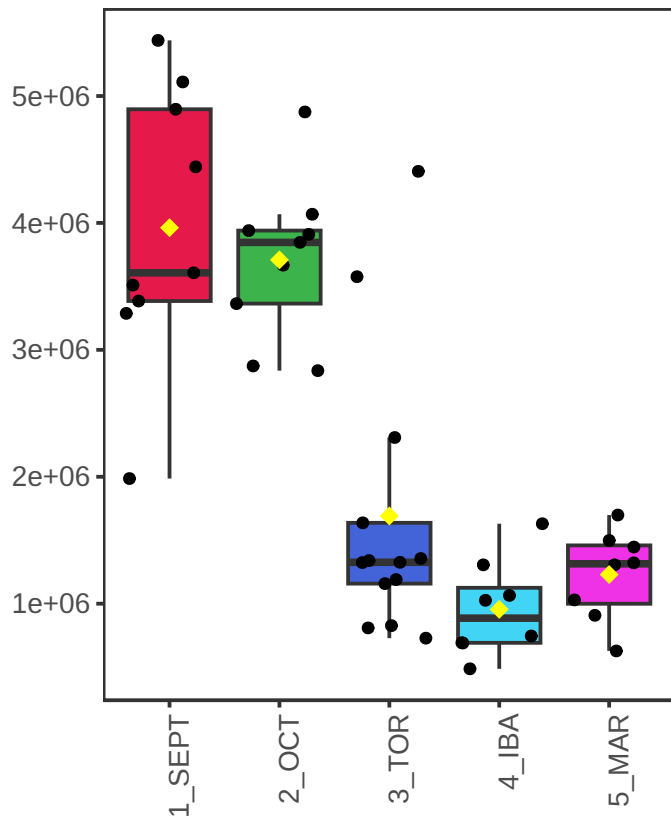

Normalized Conc.

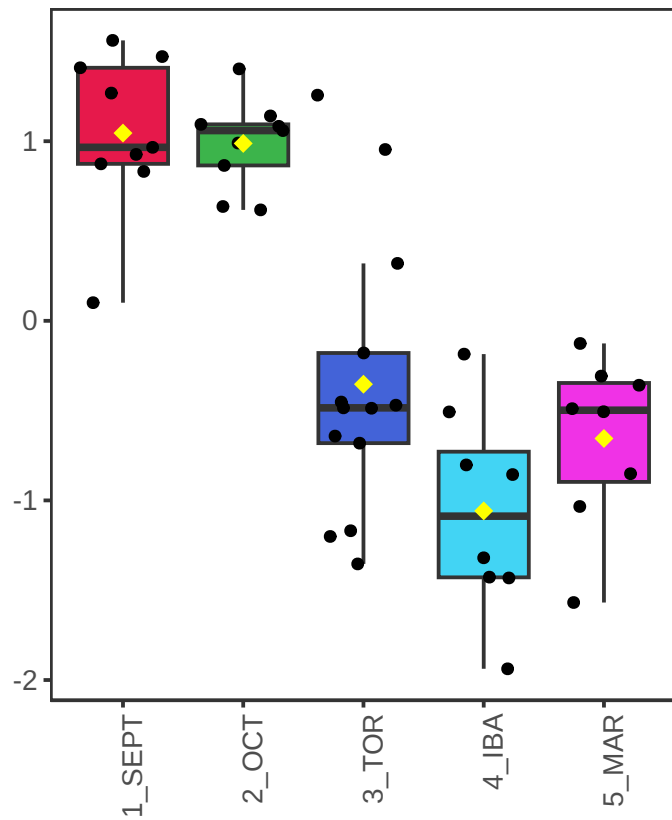

# Cystathionine

## Original Conc.

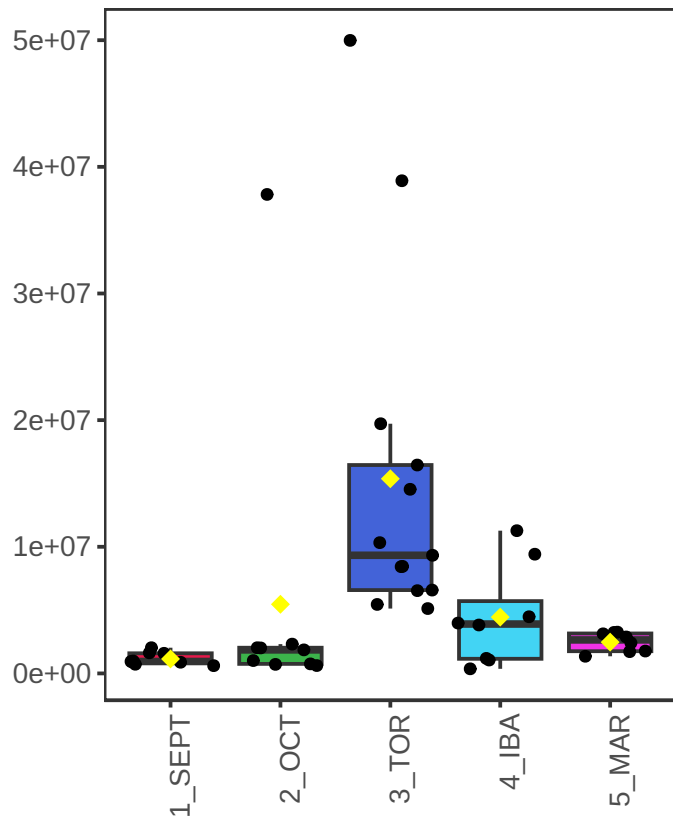

## Normalized Conc.

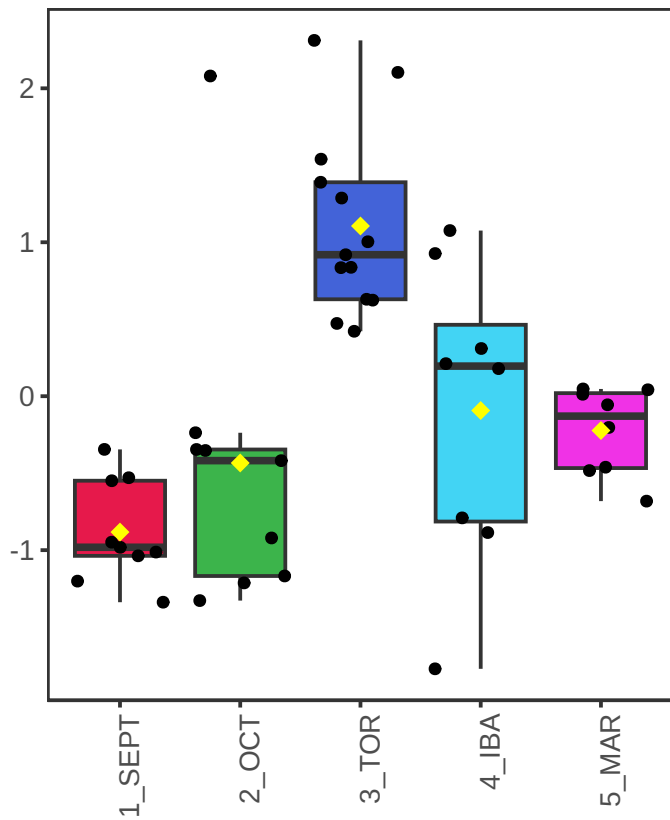

# Cysteinylglycine

Original Conc.

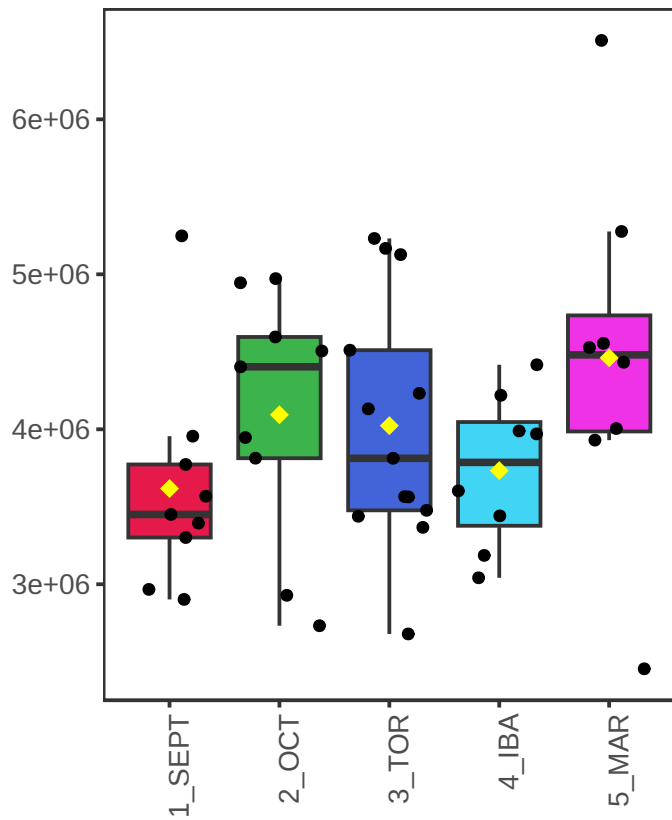

Normalized Conc.

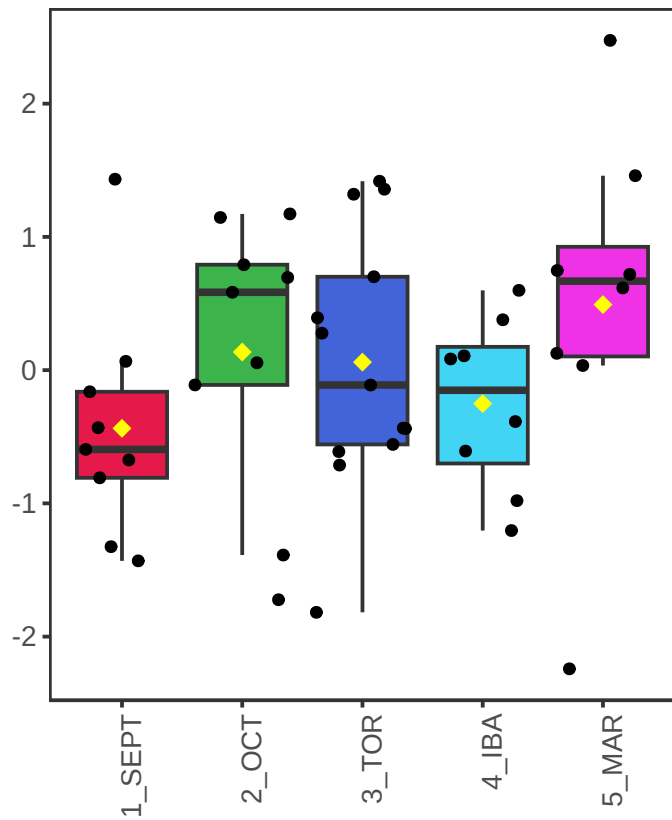



# Cytidine 5'-monophosphate (hydrate)

Original Conc.

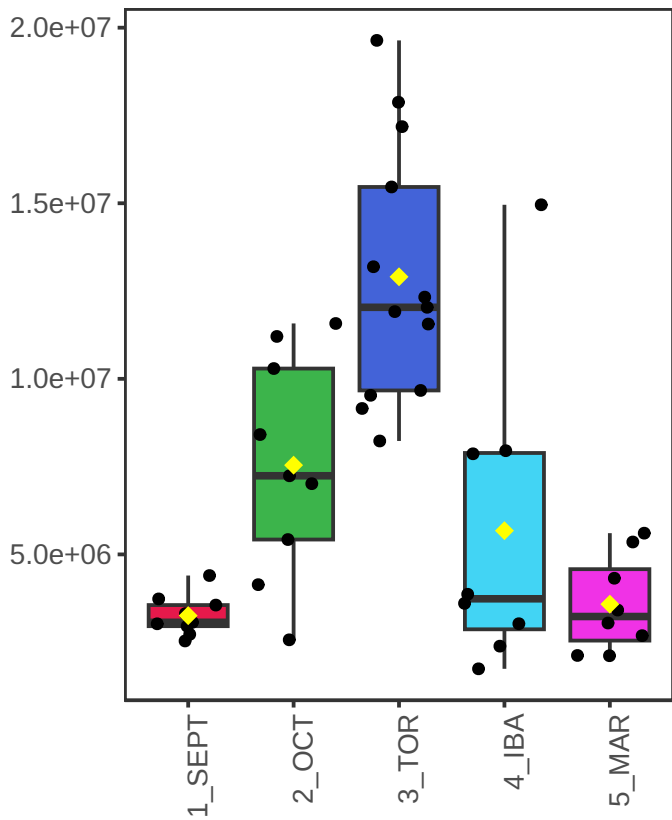

Normalized Conc.

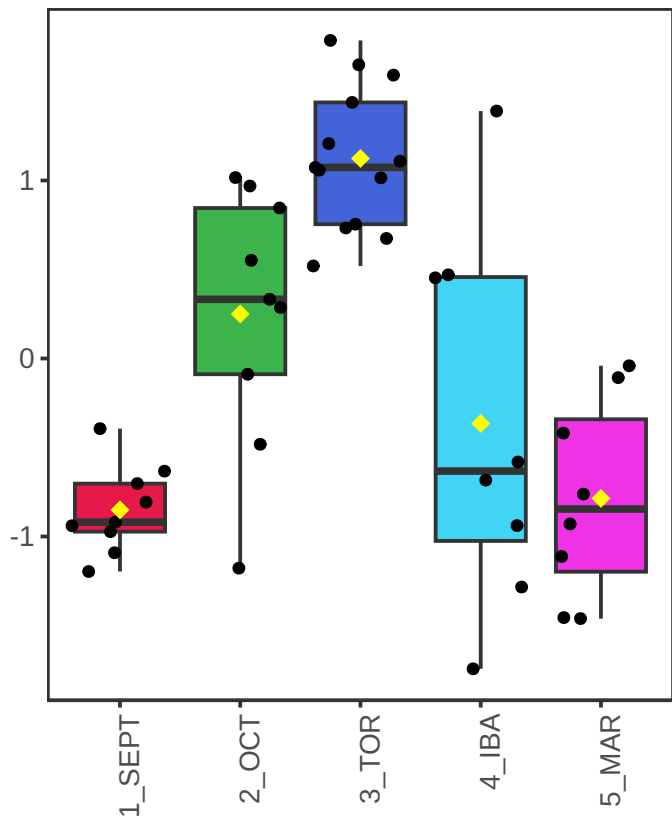

# Cytosine

Original Conc.

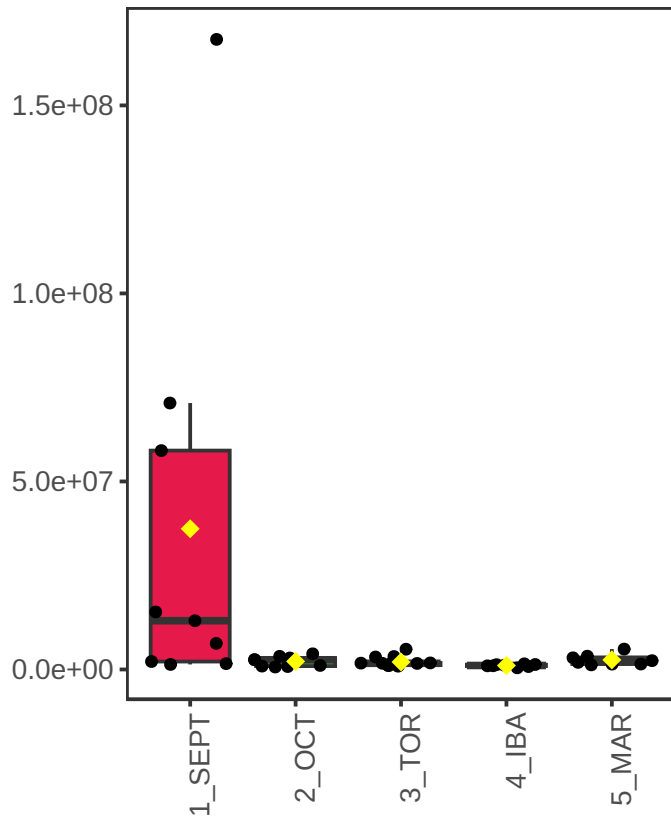

Normalized Conc.

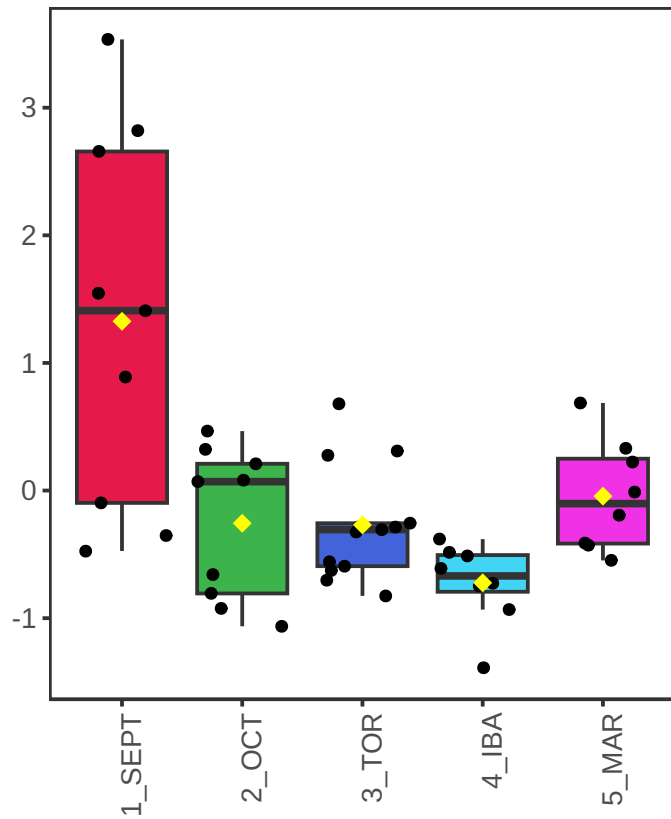

# delta-Guanidinovaleric acid

Original Conc.

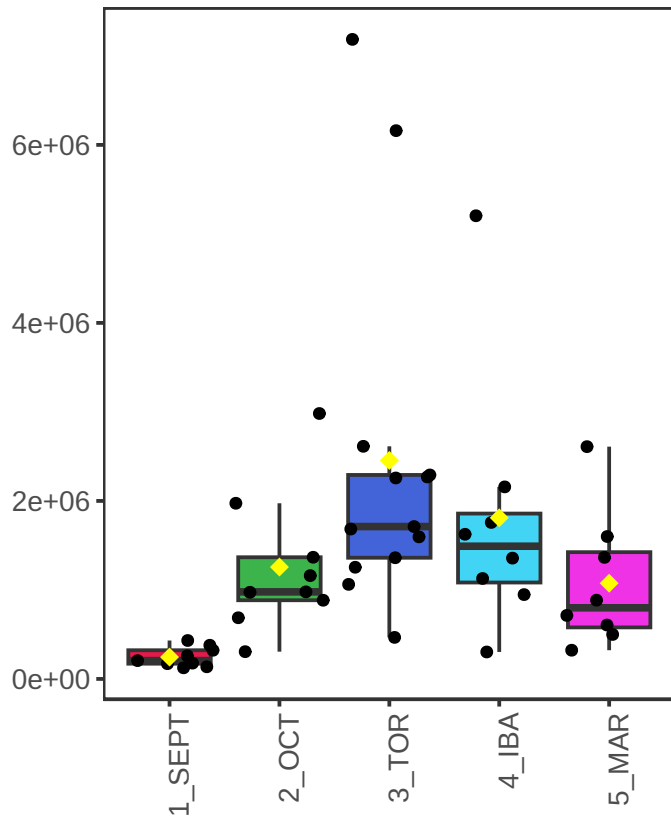

Normalized Conc.

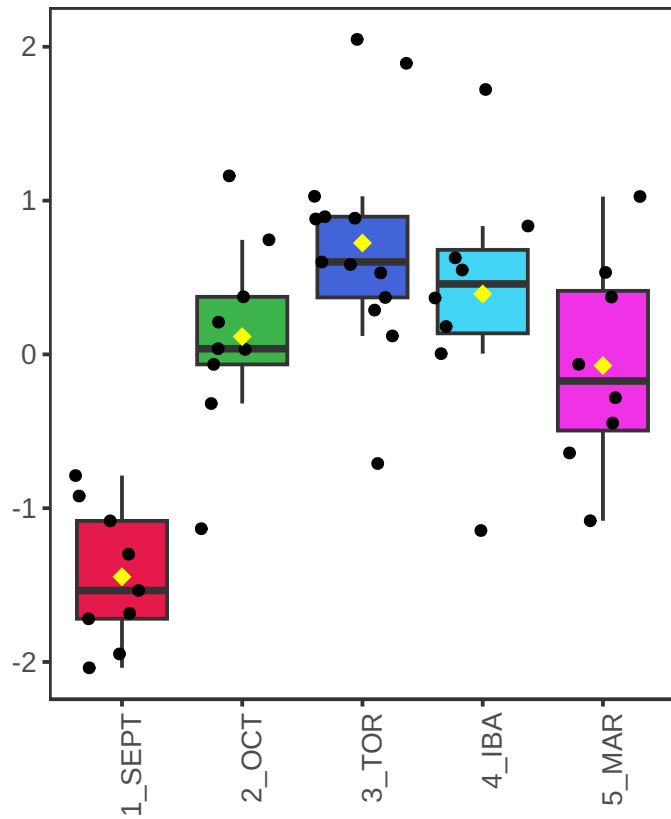

# Dihydrothymine

Original Conc.

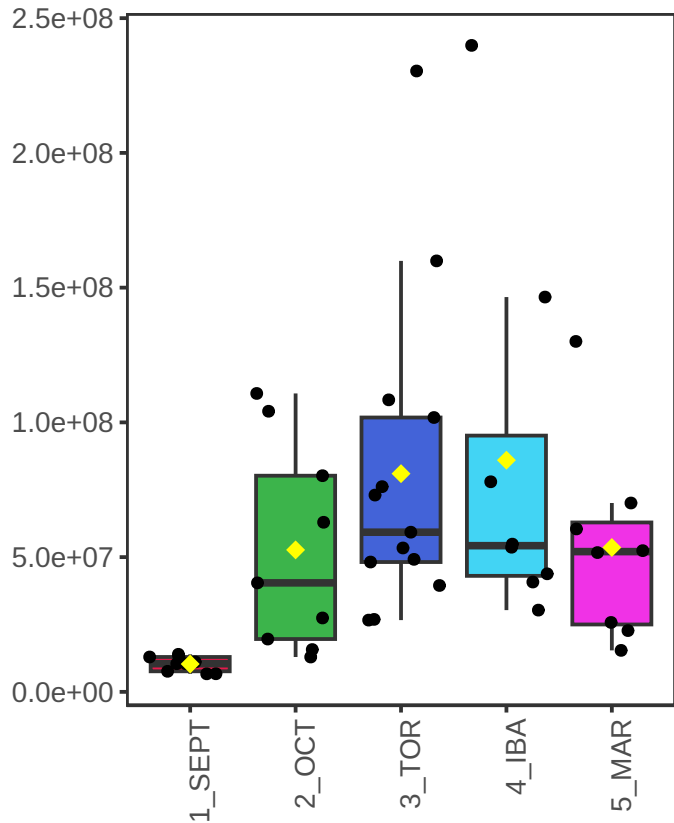

Normalized Conc.

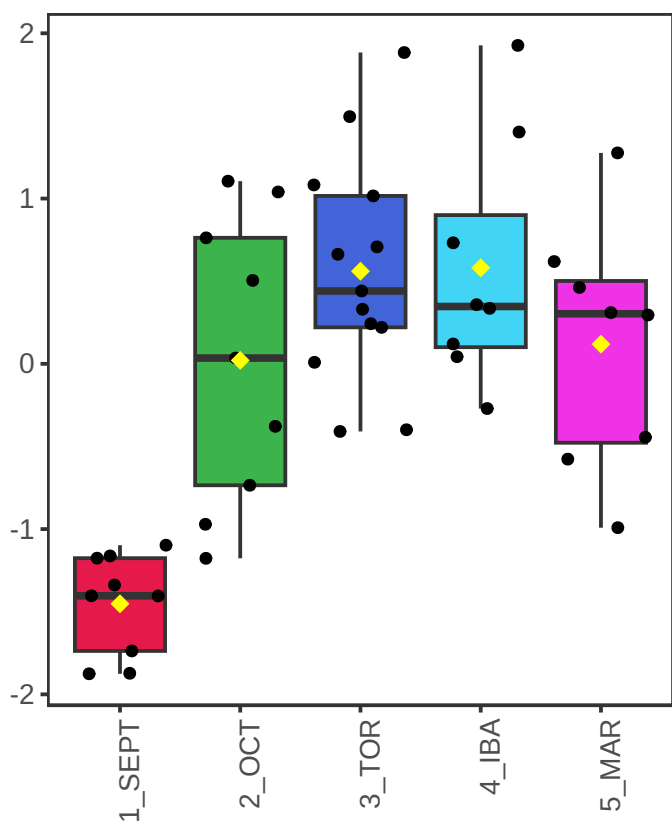

# Dimethylethanolamine

Original Conc.

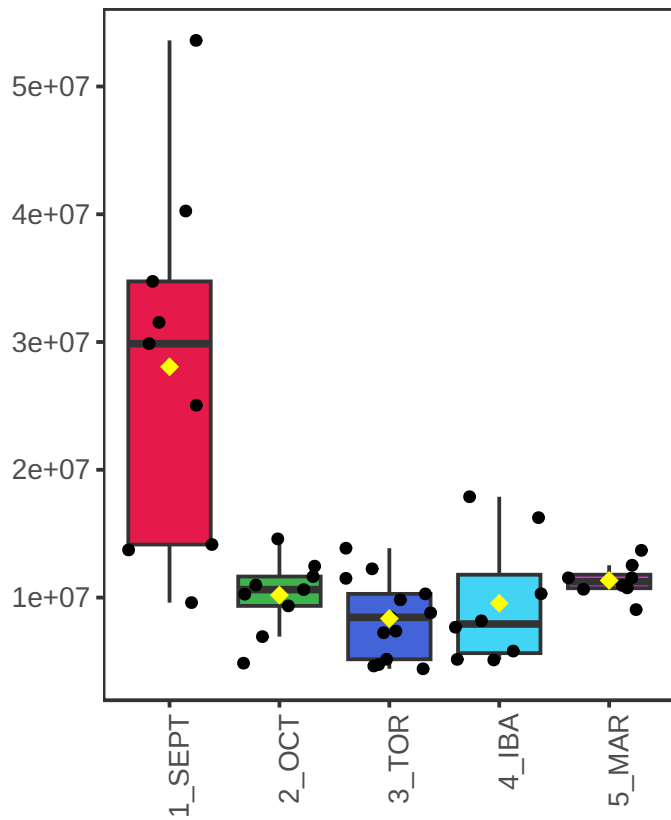

Normalized Conc.

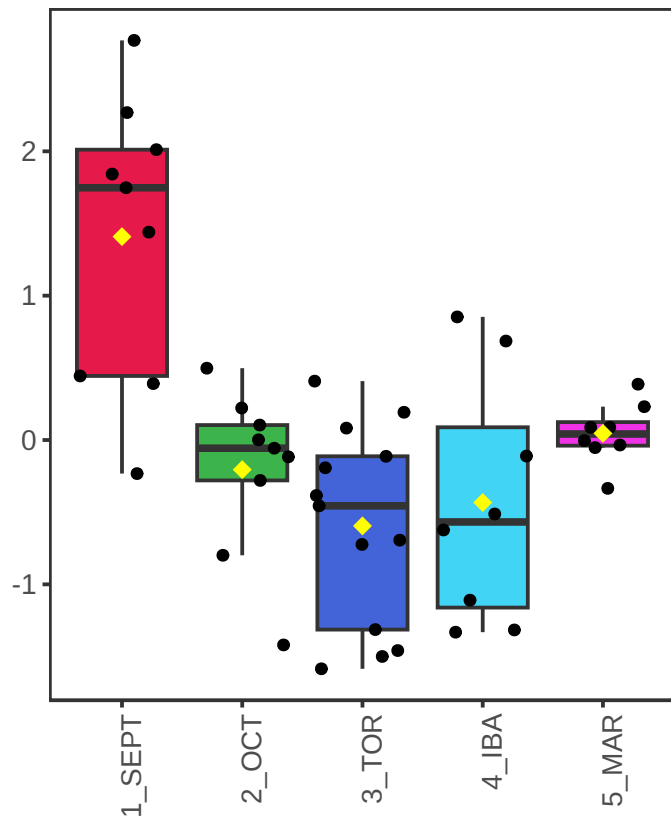

# Epsilon-(gamma-Glutamyl)-lysine

Original Conc.

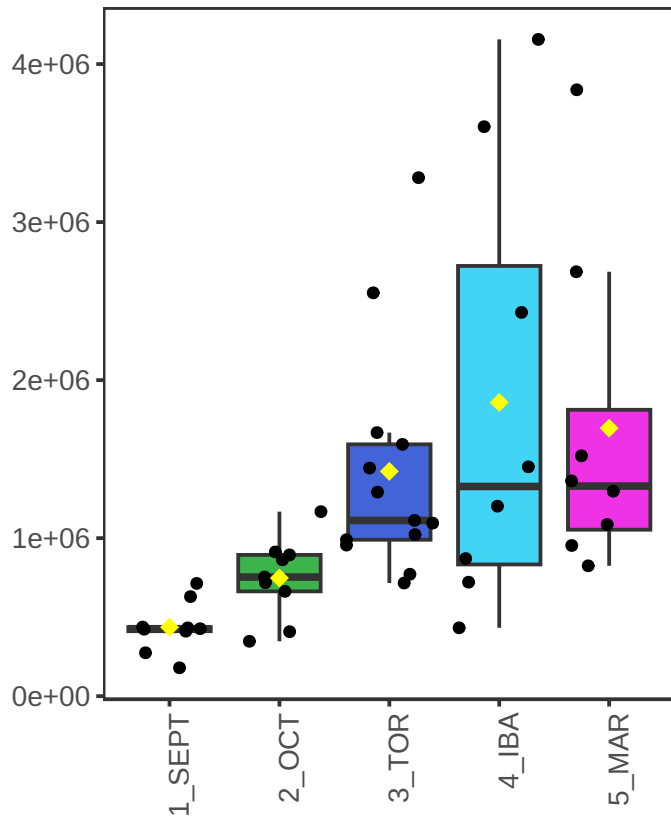

Normalized Conc.

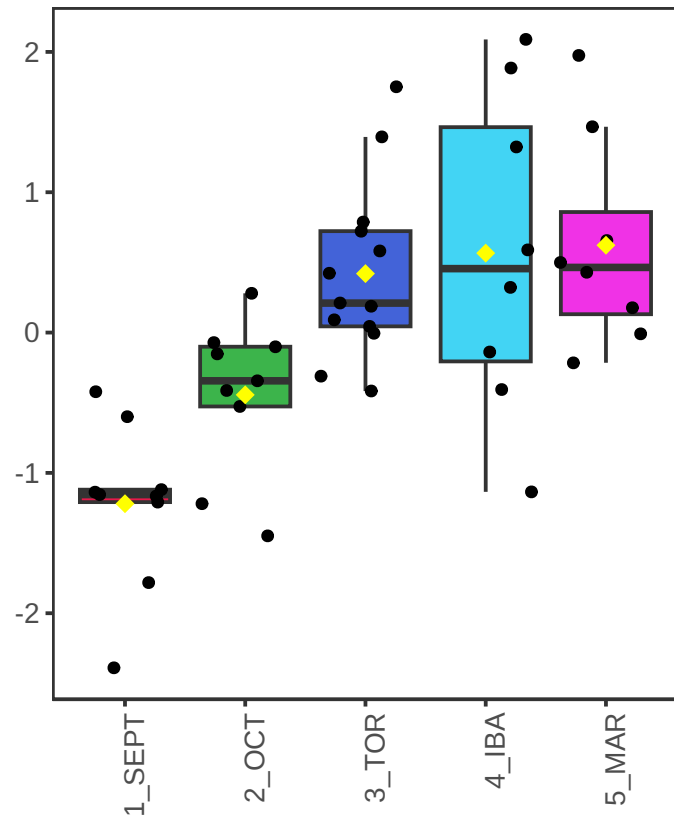

# Ergothioneine

Original Conc.

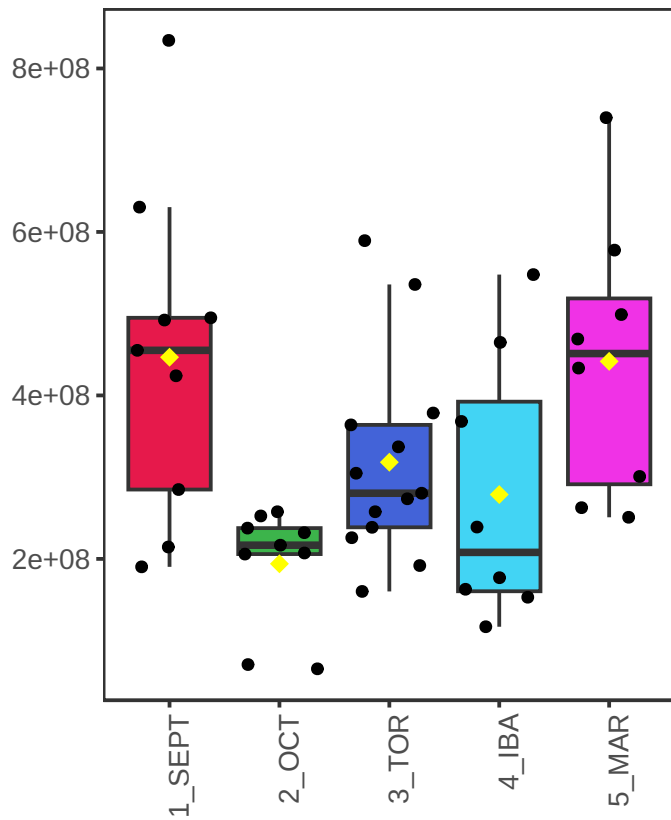

Normalized Conc.

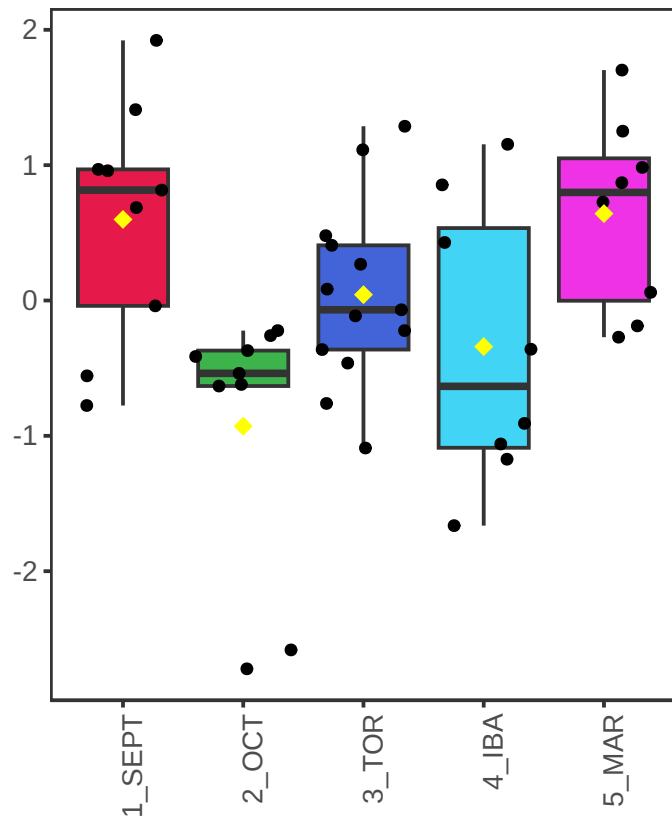

# Ethanolamine

Original Conc.

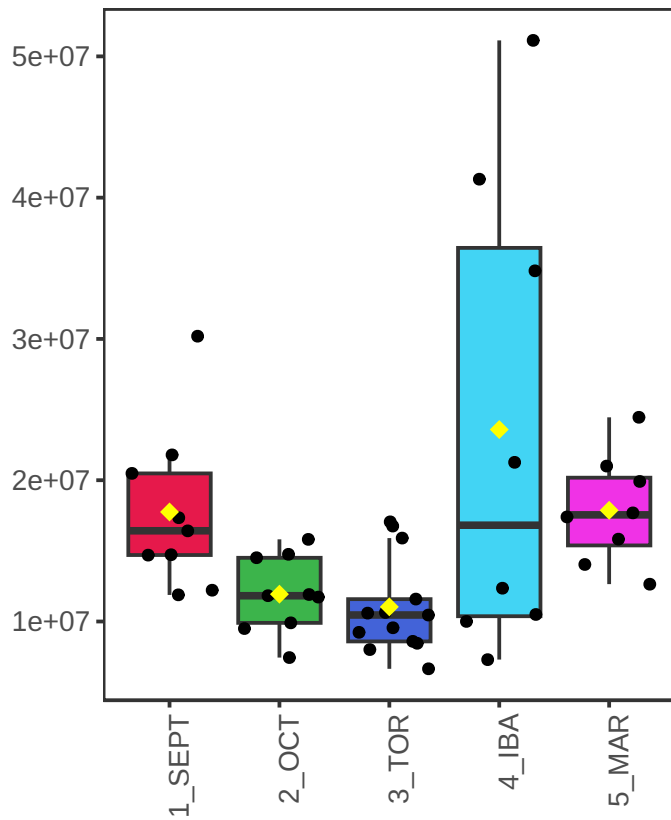

Normalized Conc.

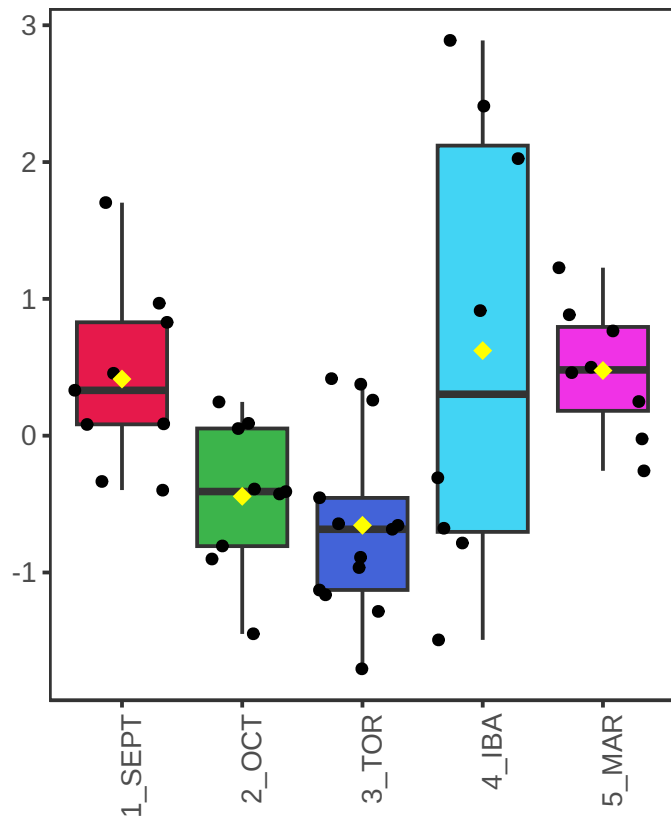



# Ethyl acetate

Original Conc.

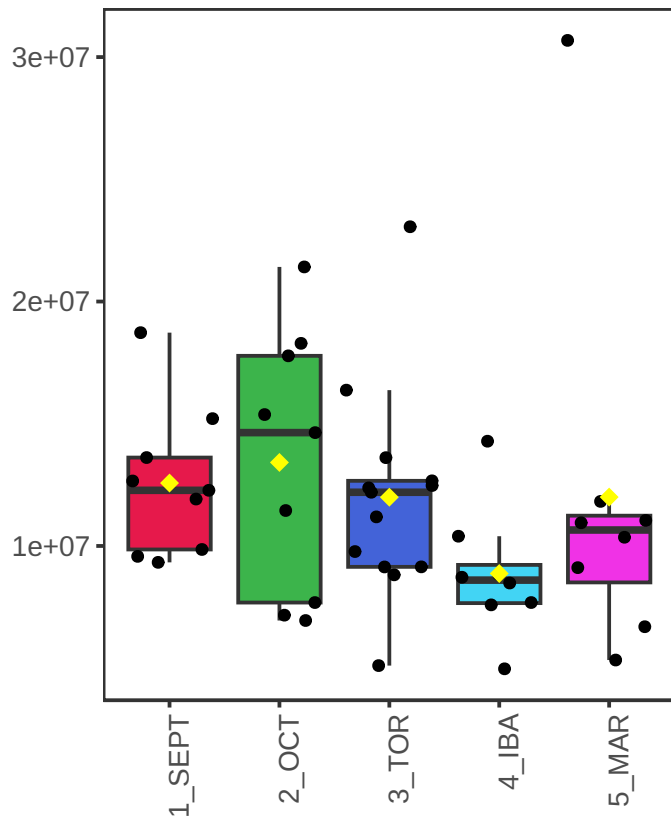

Normalized Conc.

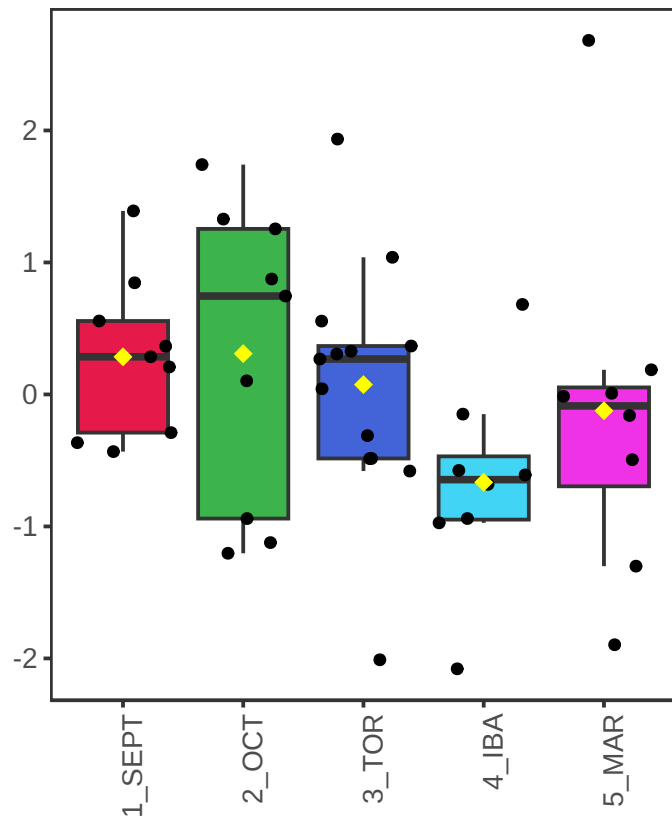

# Formiminoglutamic Acid

Original Conc.

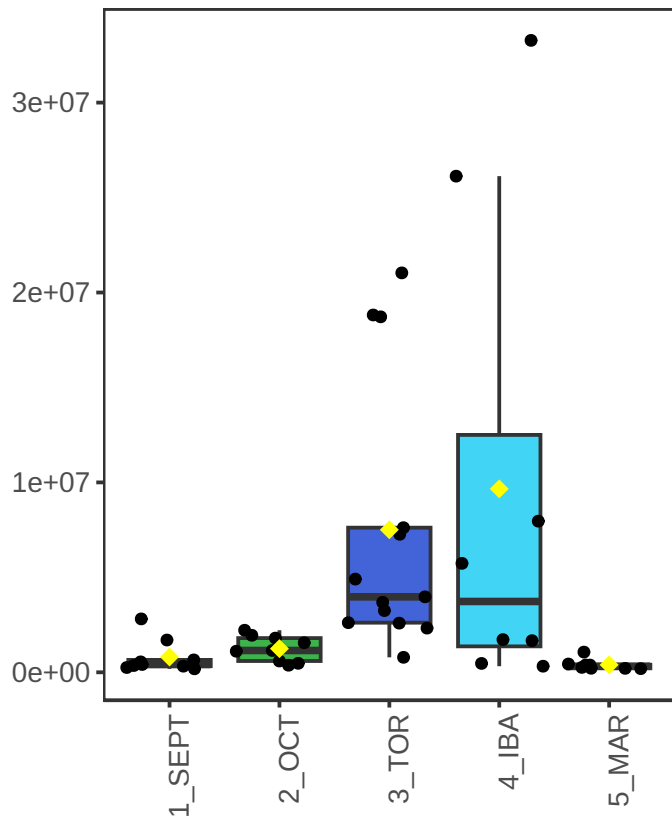

Normalized Conc.

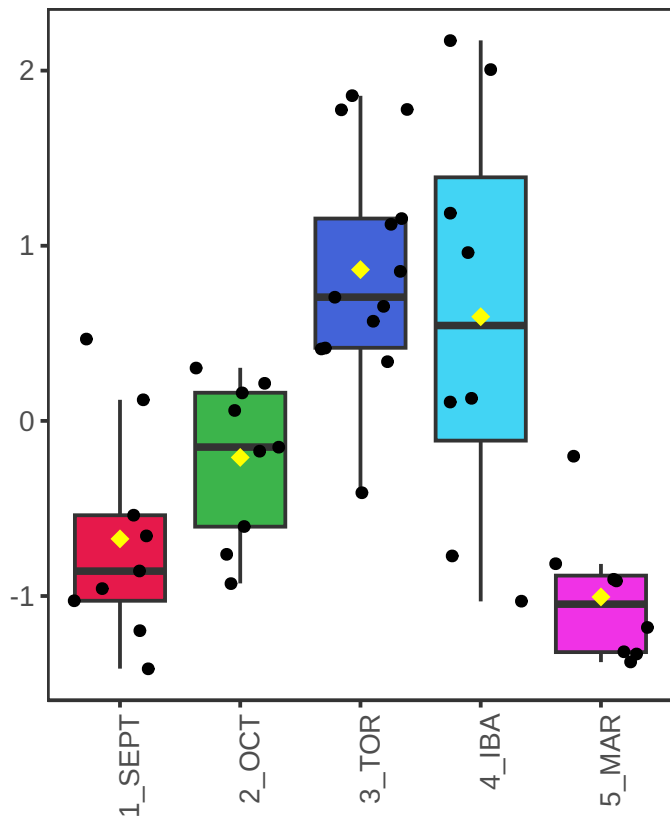

# gamma-Glutamylleucine

Original Conc.

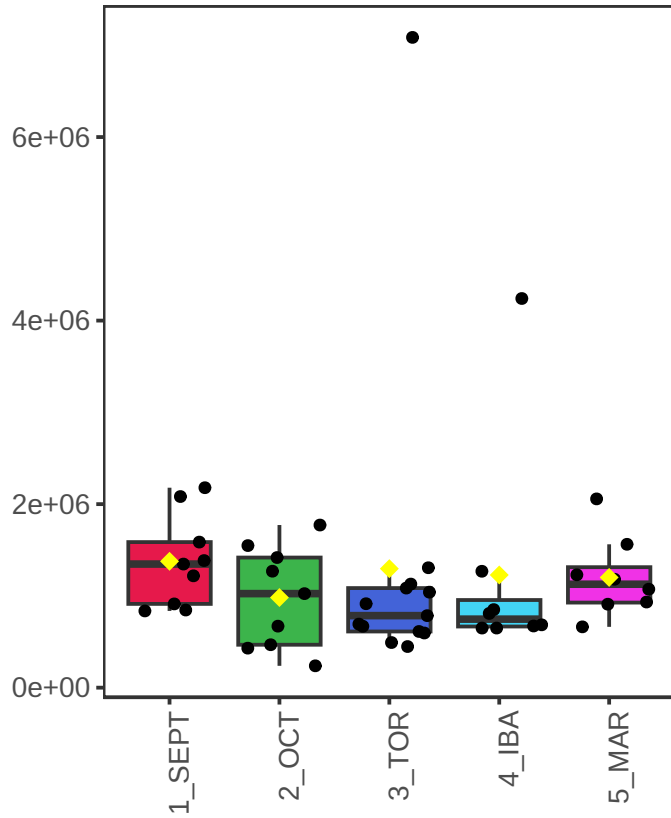

Normalized Conc.

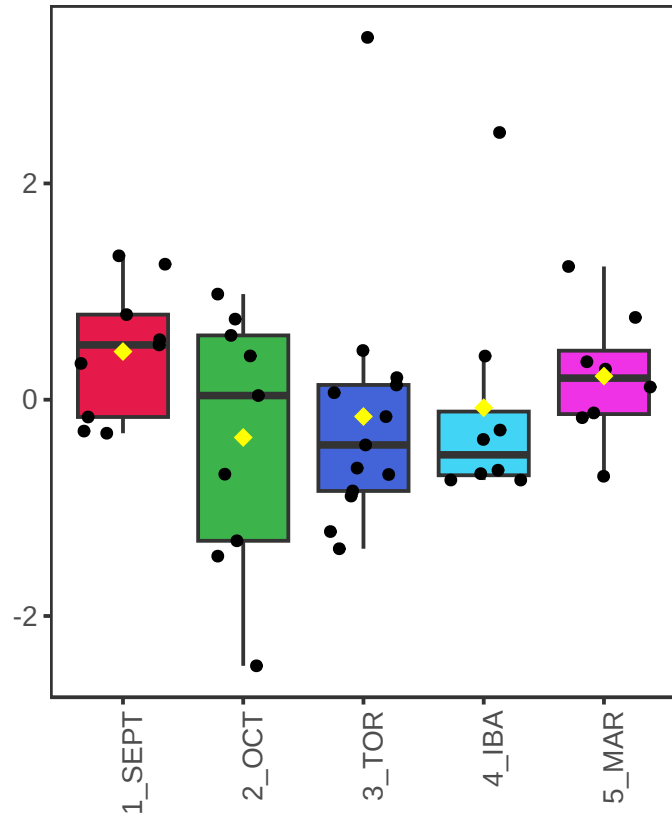

# Glutamic acid

Original Conc.

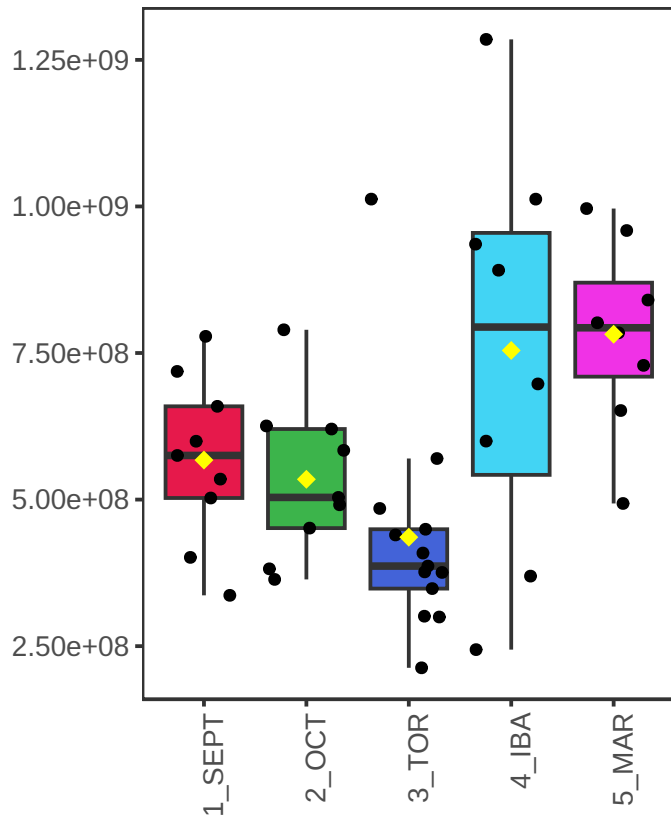

Normalized Conc.

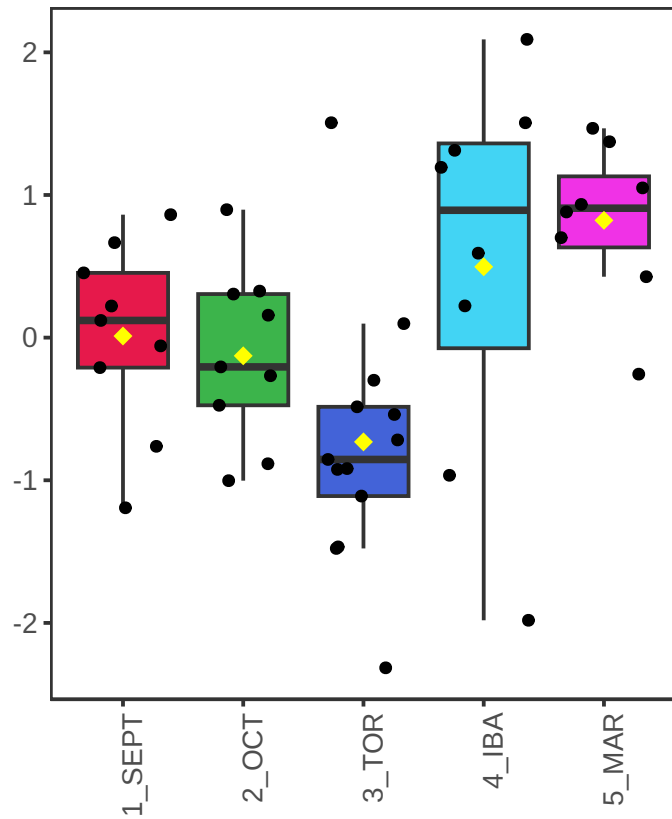

# Glutamine

Original Conc.

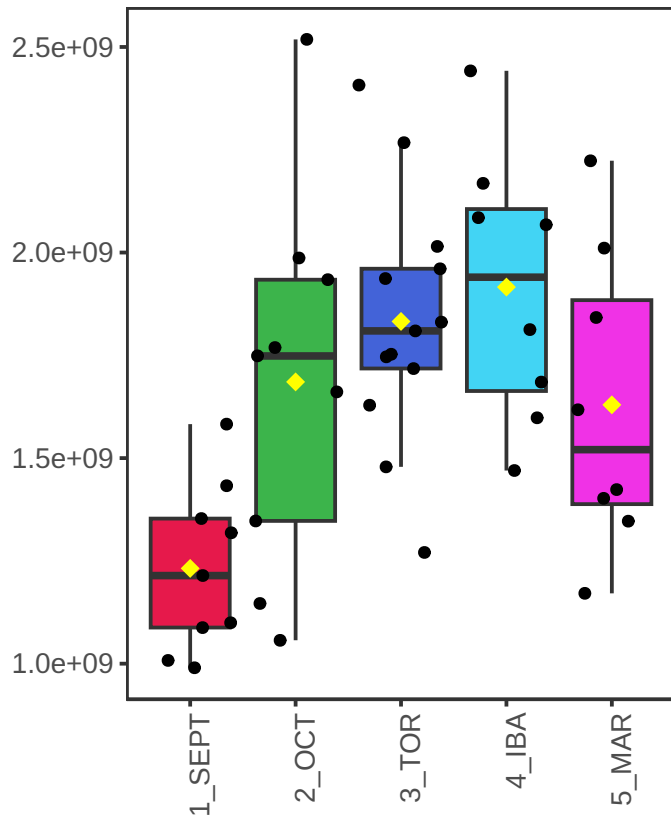

Normalized Conc.

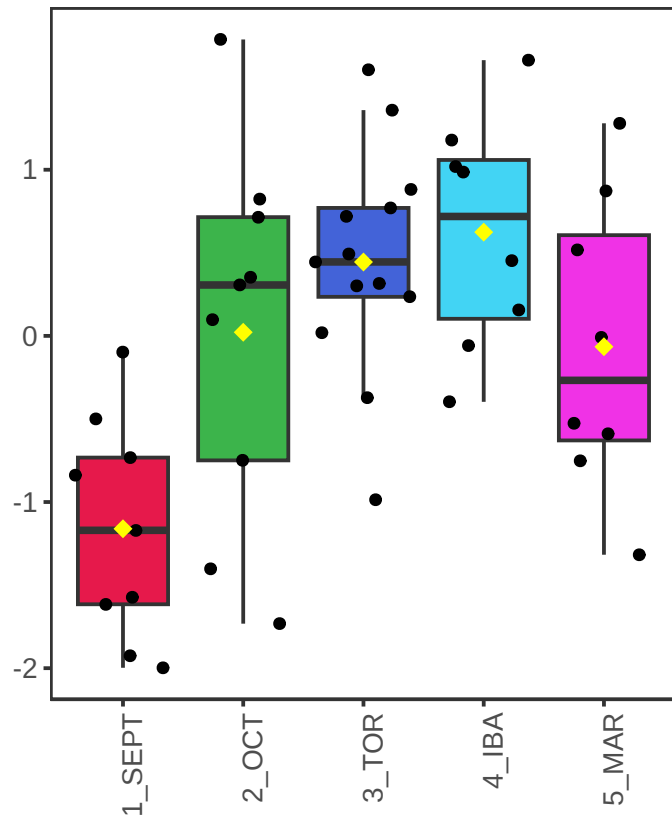

# Glutathione (reduced)

Original Conc.

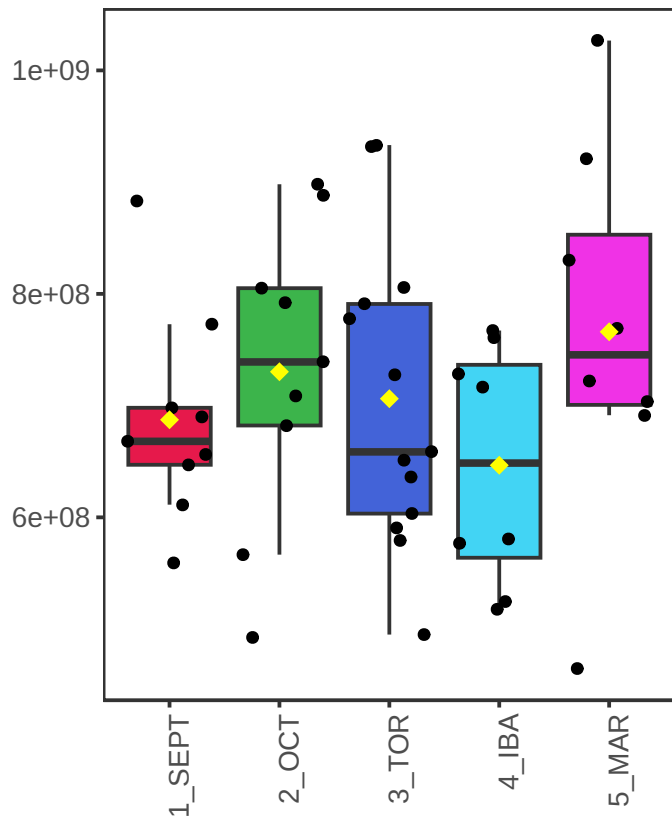

Normalized Conc.

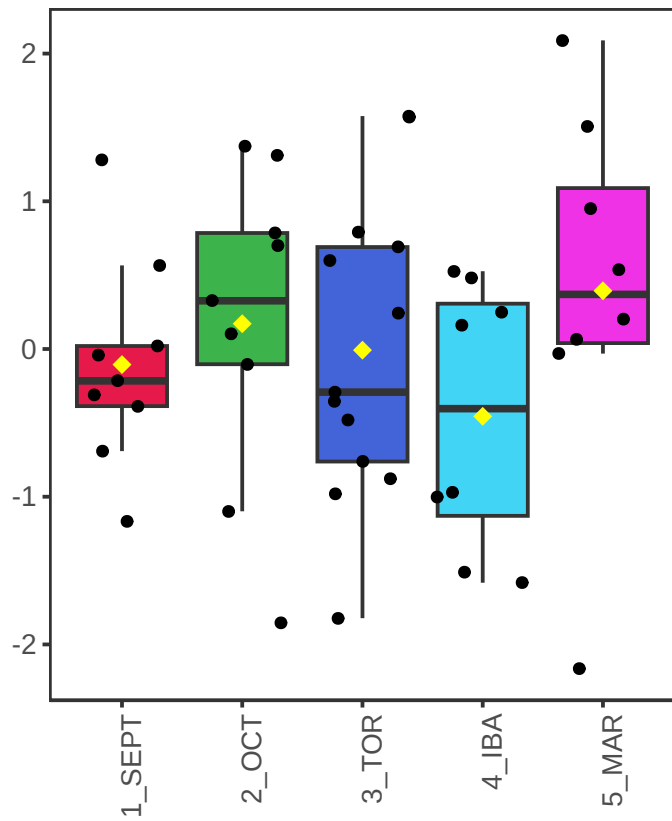

# Glycerol 3-phosphate

Original Conc.

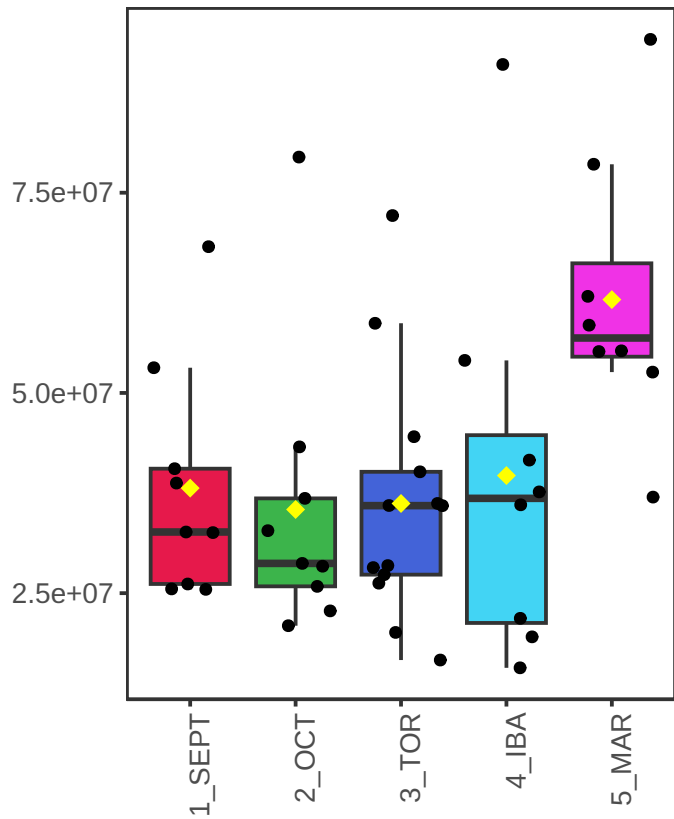

Normalized Conc.

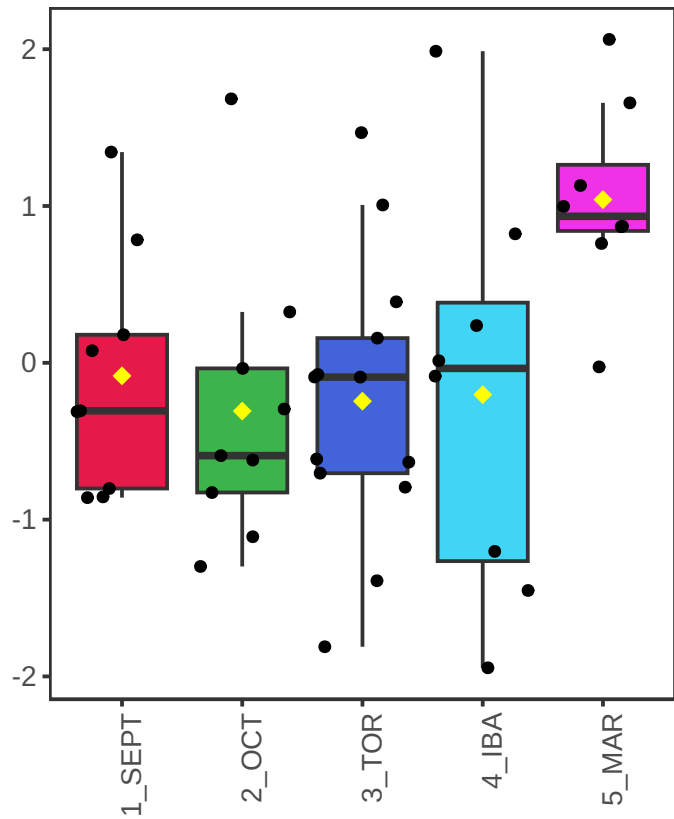

# Glycerophosphoinositol

Original Conc.

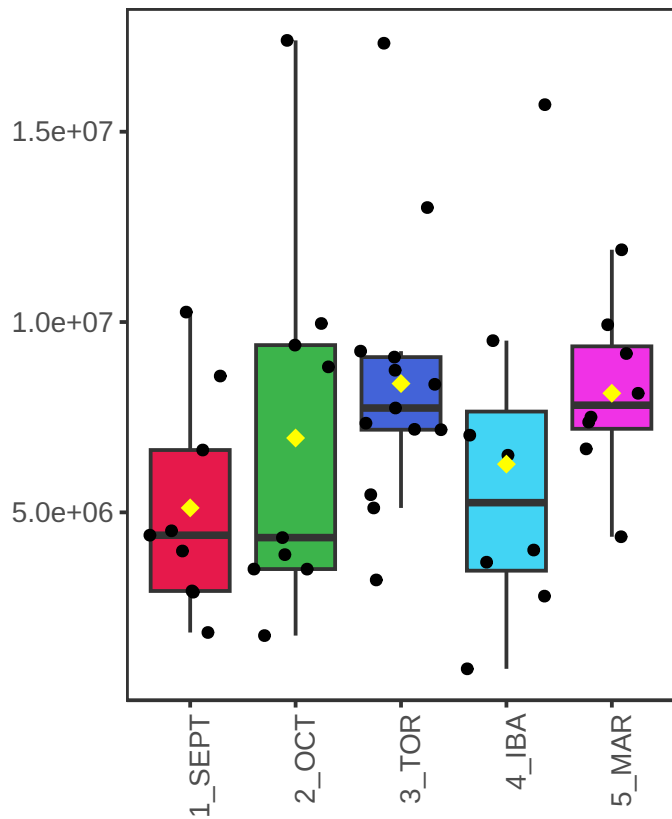

Normalized Conc.

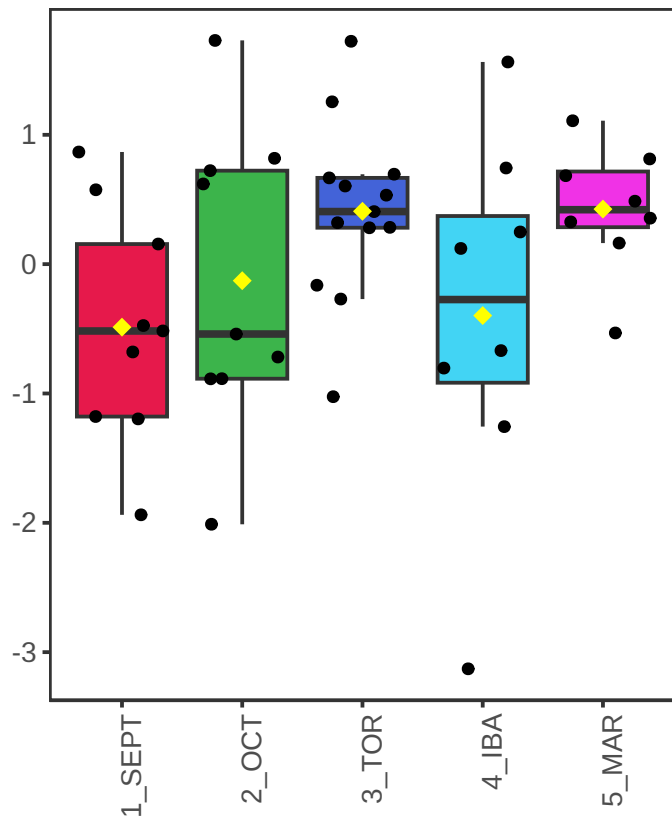



# Glycerolphosphorylethanolamine

Original Conc.

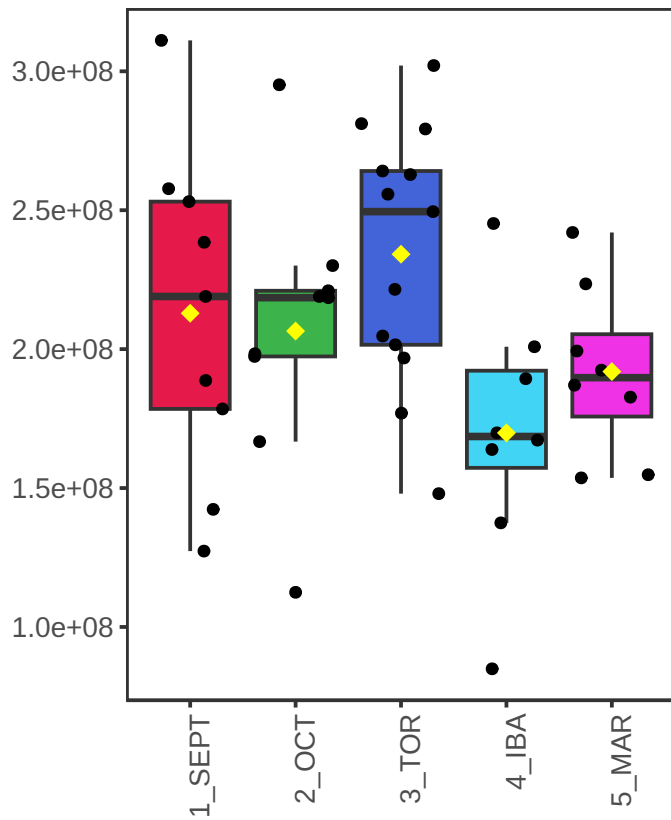

Normalized Conc.

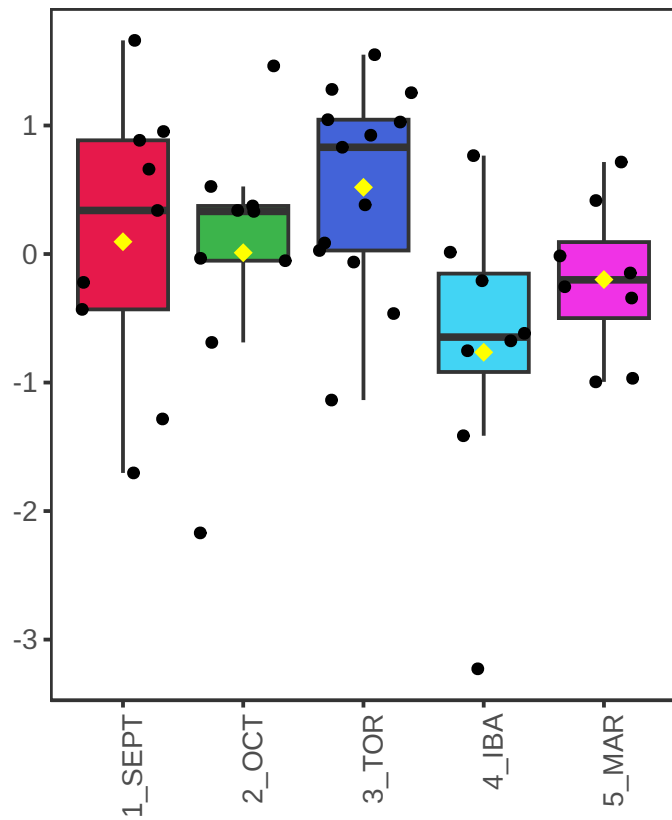

# Guanidineacetic acid

Original Conc.

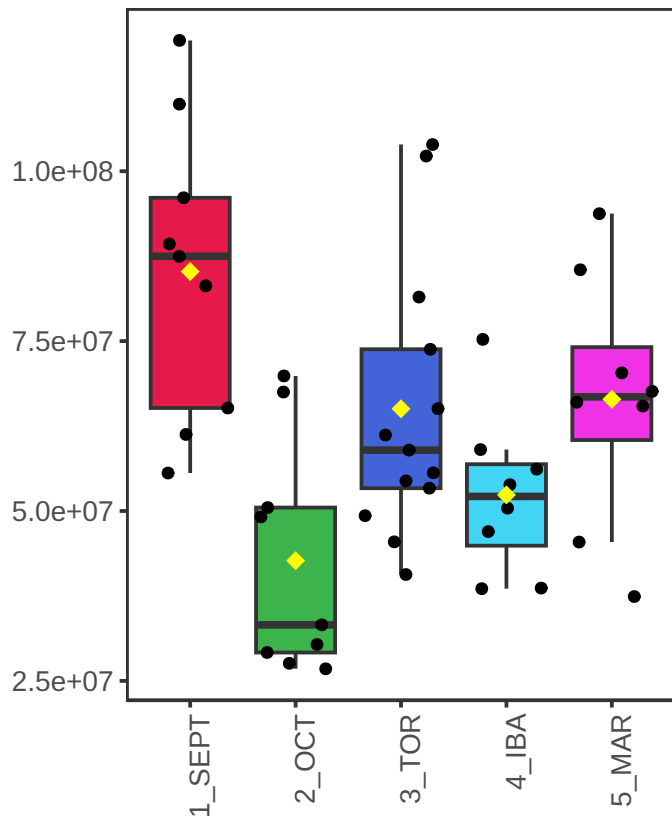

Normalized Conc.

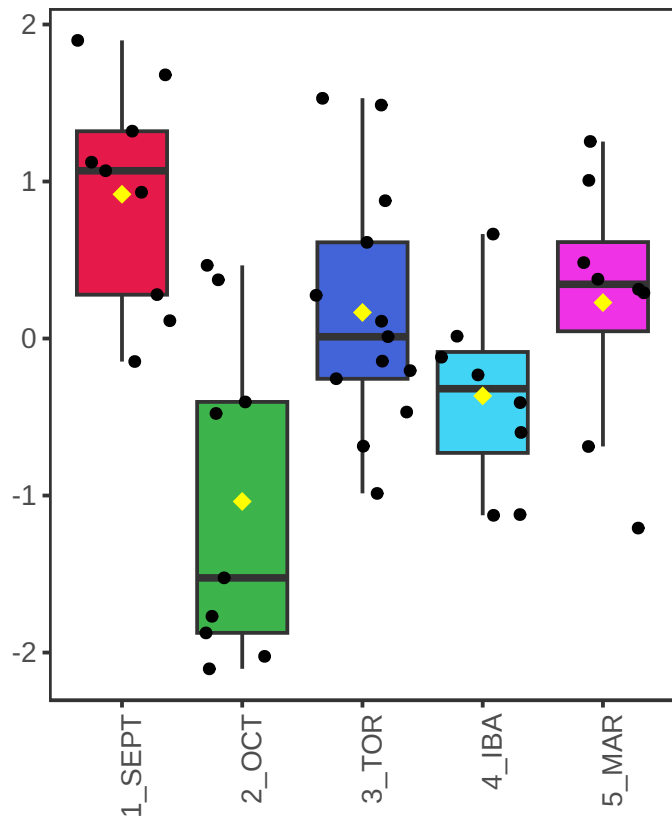

# Guanine

Original Conc.

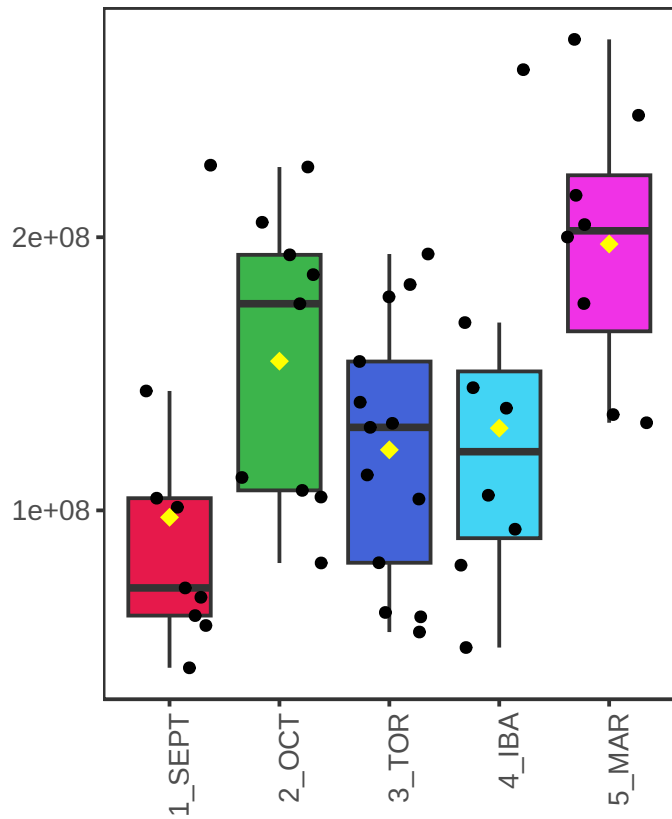

Normalized Conc.

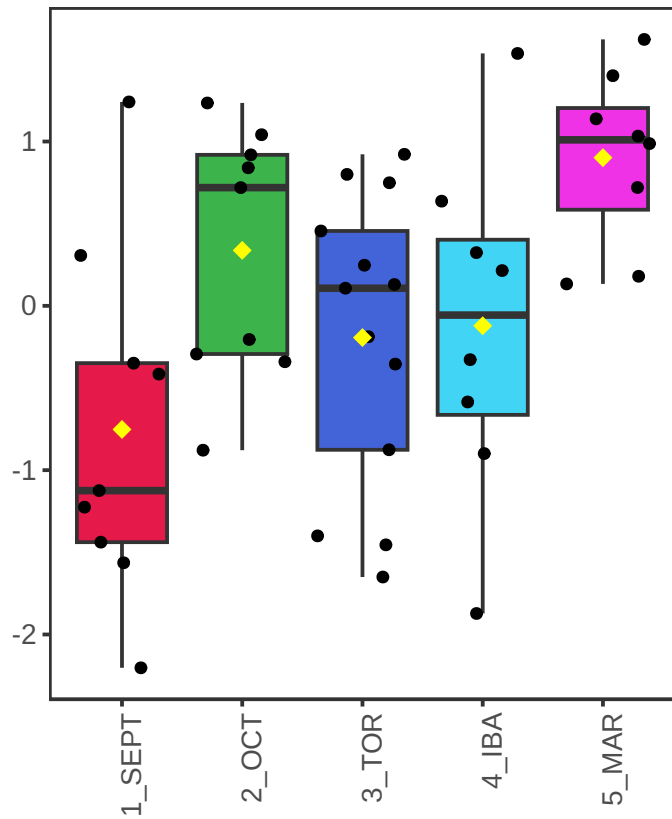

# Histamine

Original Conc.

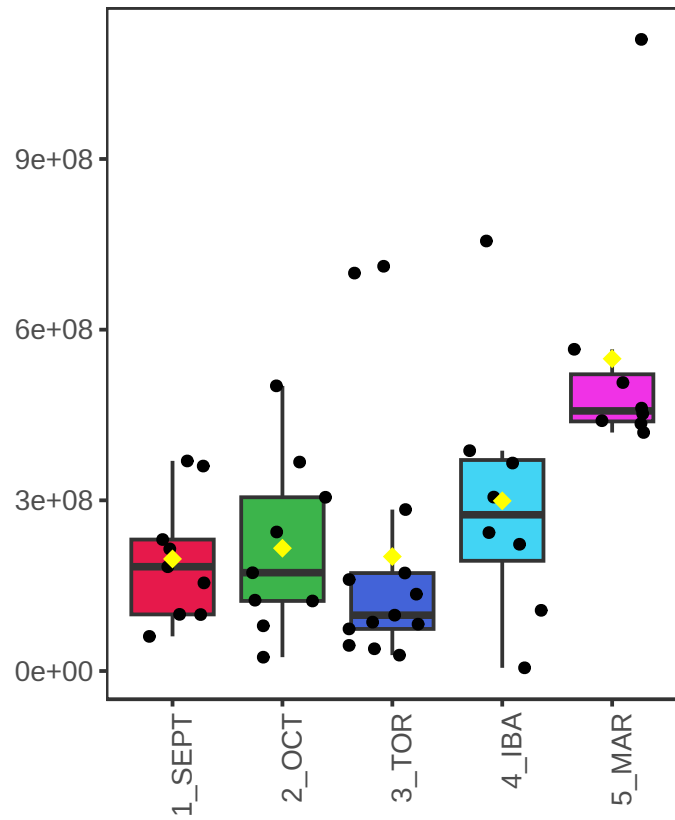

Normalized Conc.

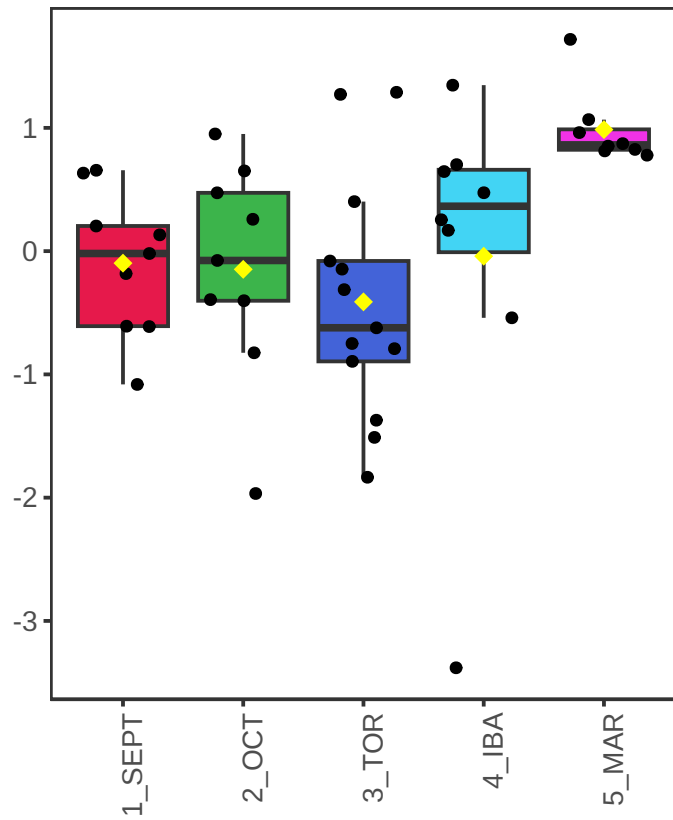

# Hydroxyhexanoylcarnitine

Original Conc.

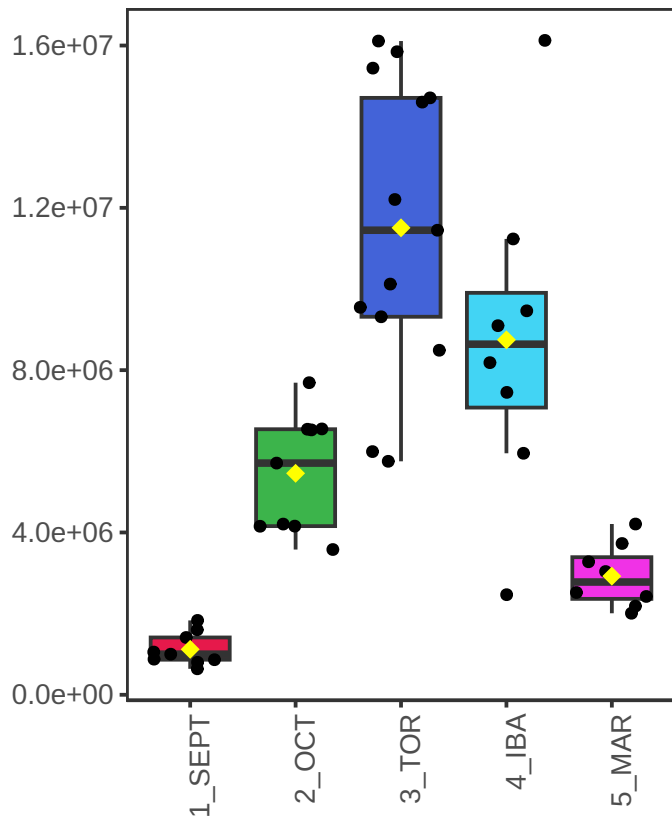

Normalized Conc.

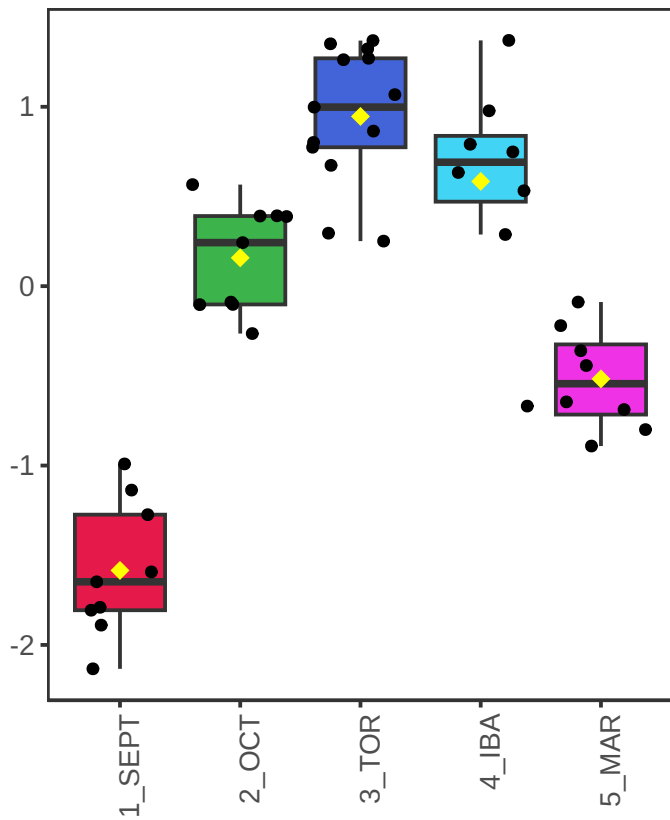

# Hypaphorine

Original Conc.

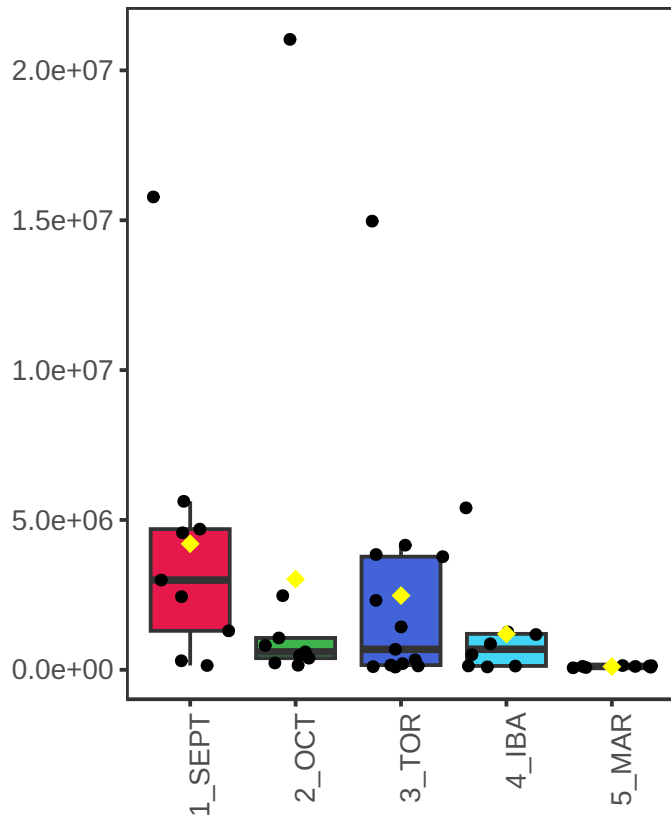

Normalized Conc.

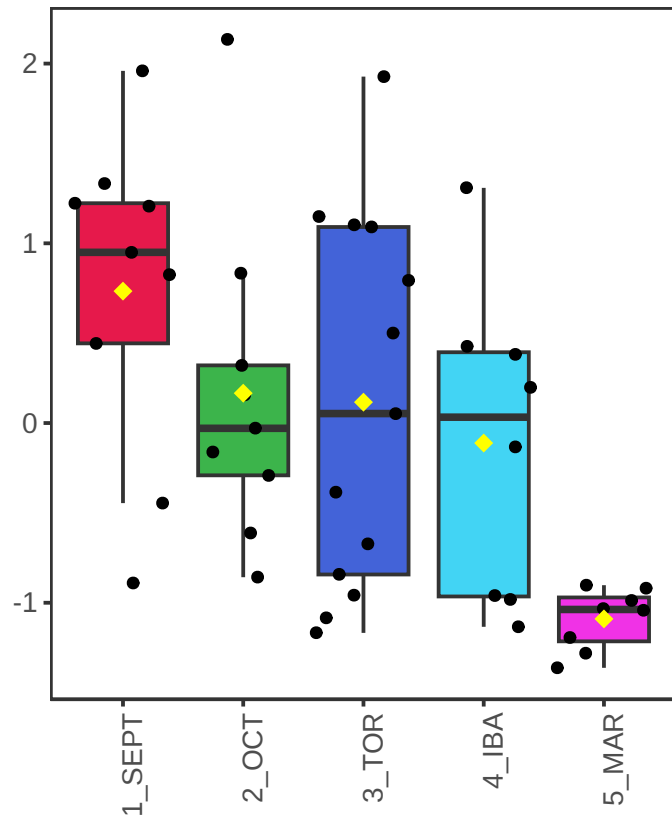

# Hypotaurine

Original Conc.

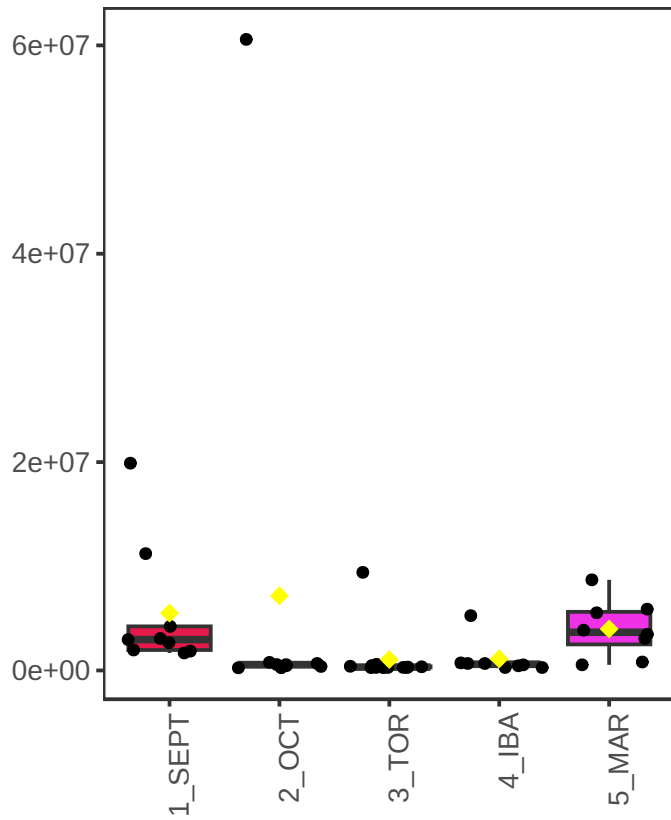

Normalized Conc.

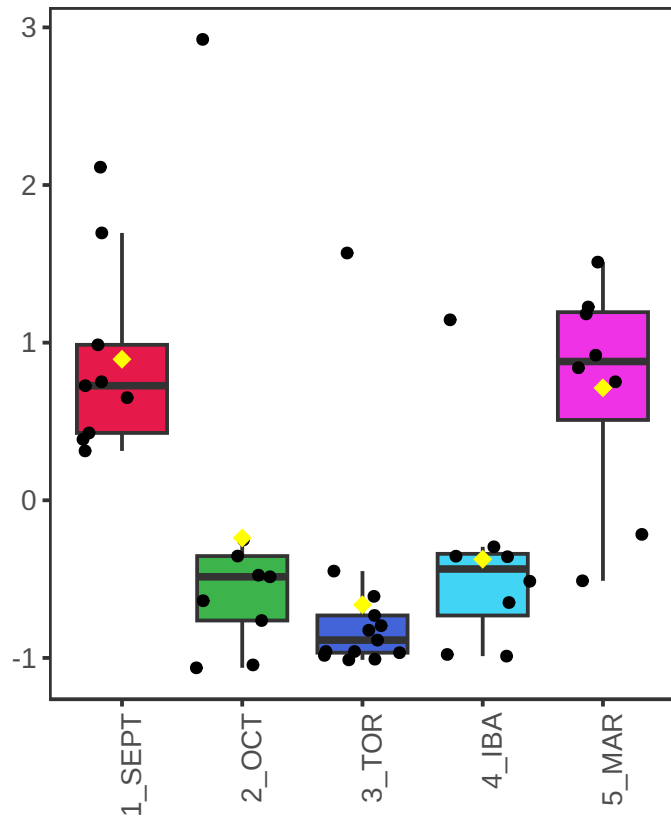

# Hypoxanthine

Original Conc.

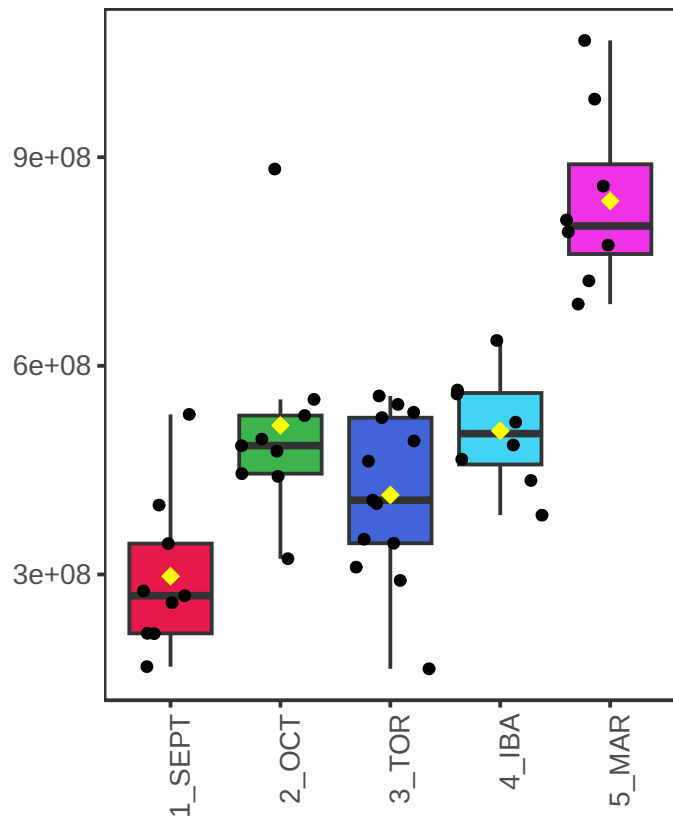

Normalized Conc.

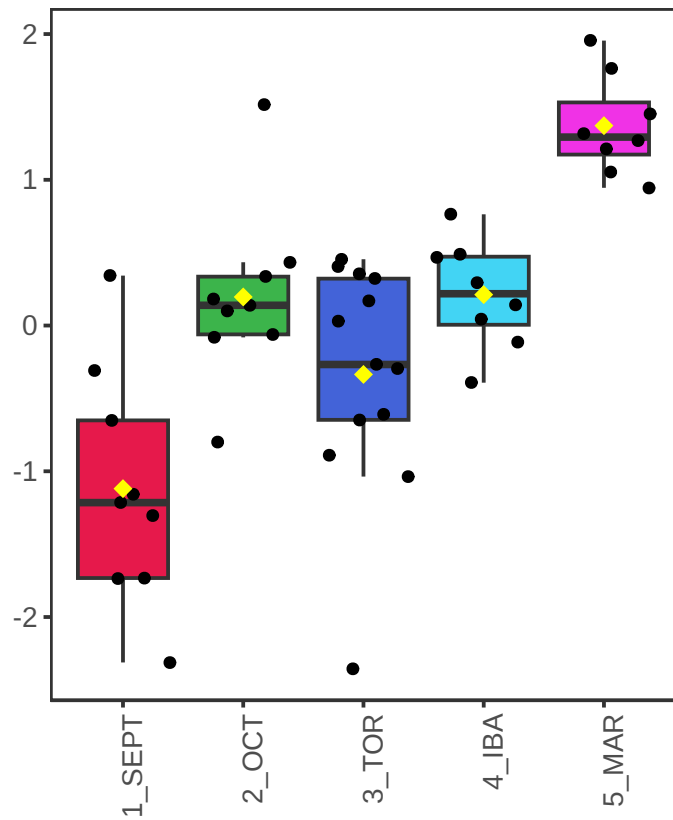



# Imidazoleacetic acid

Original Conc.

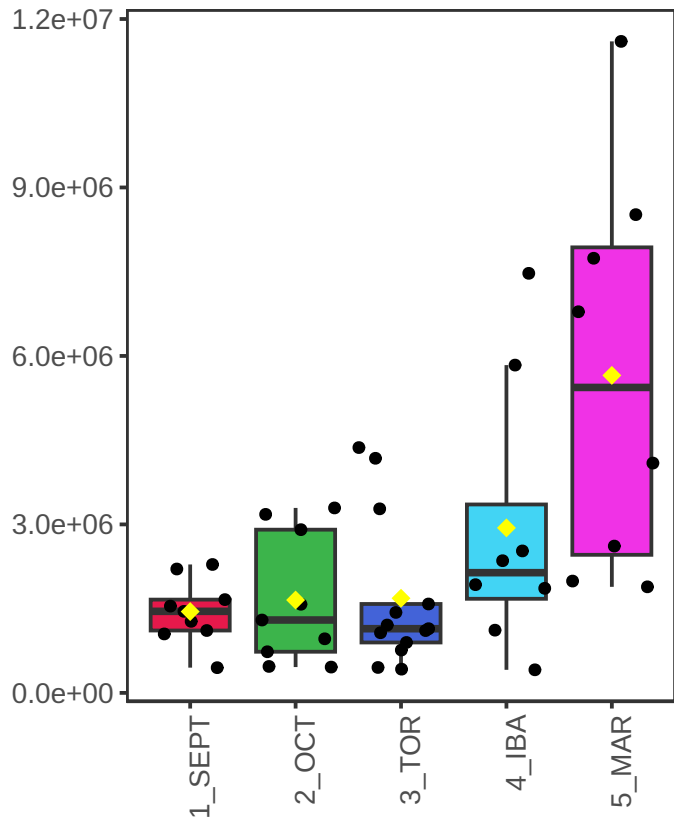

Normalized Conc.

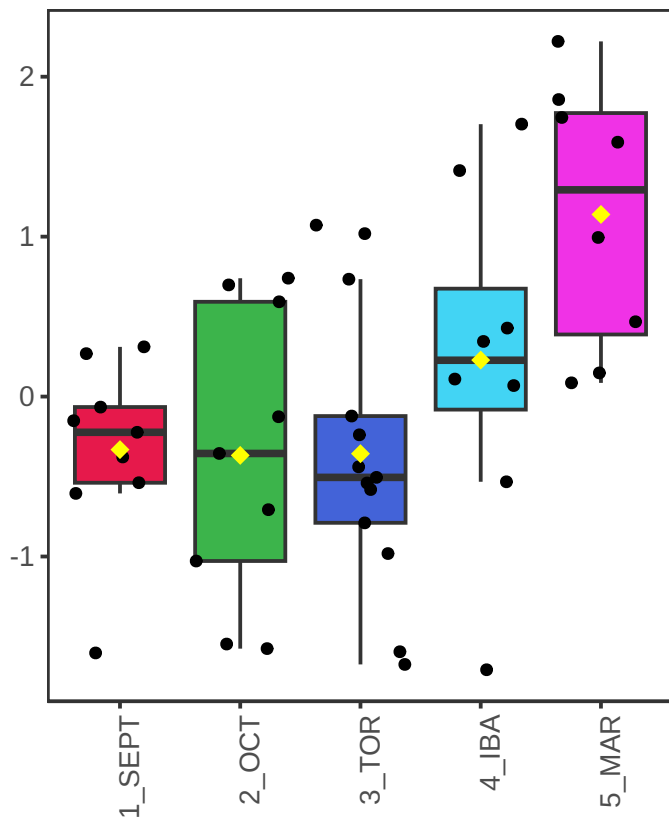

# Inosine

Original Conc.

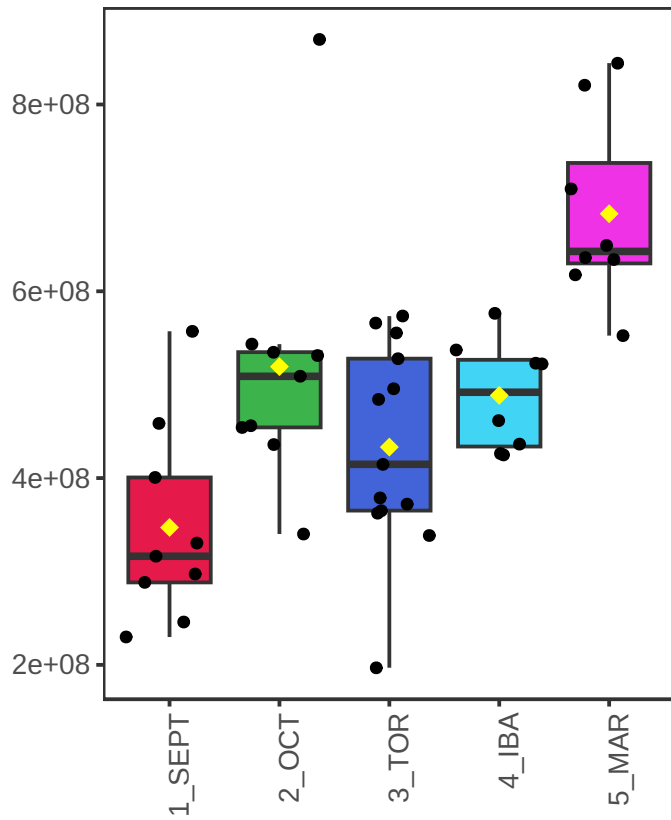

Normalized Conc.

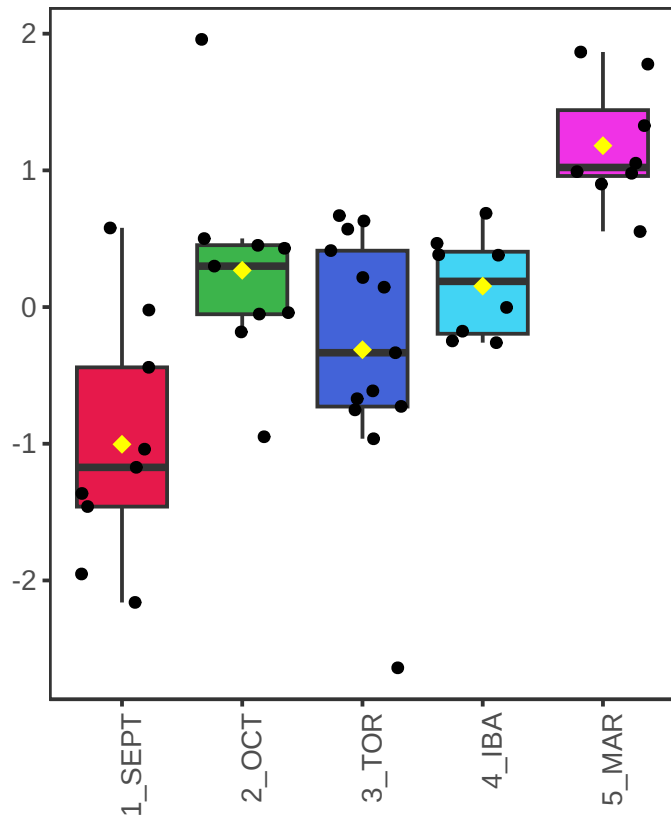

# Inosine-5'-monophosphate (IMP)

Original Conc.

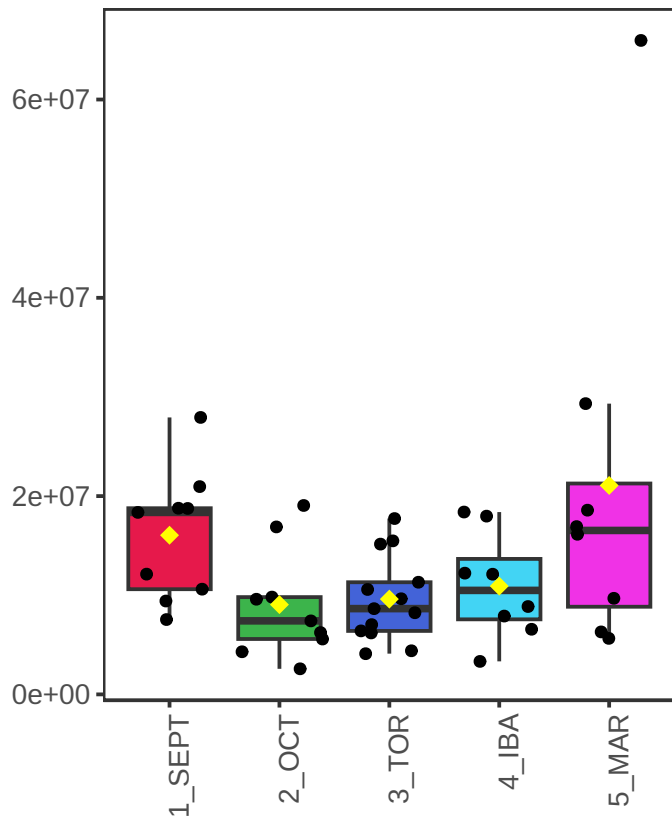

Normalized Conc.

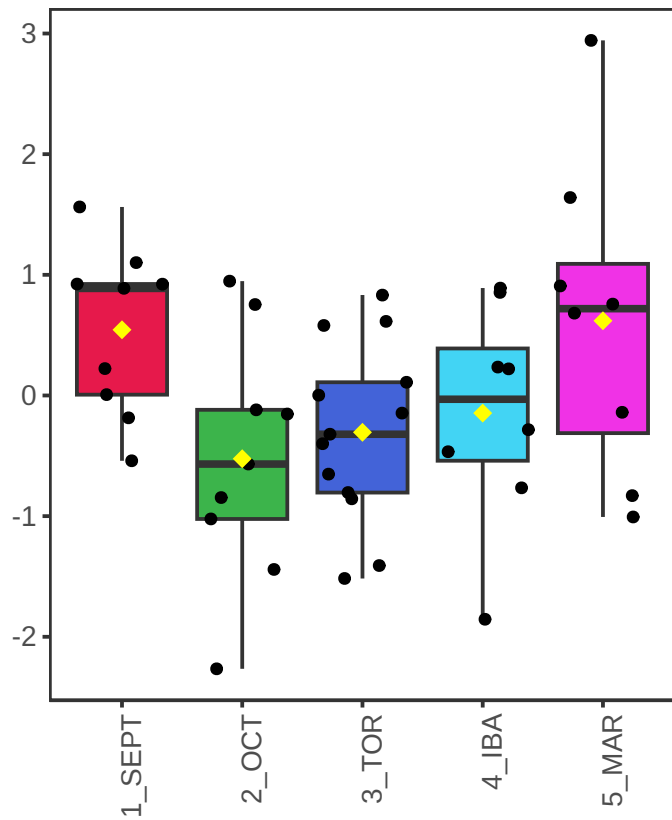

# Inositol cyclic phosphate

Original Conc.

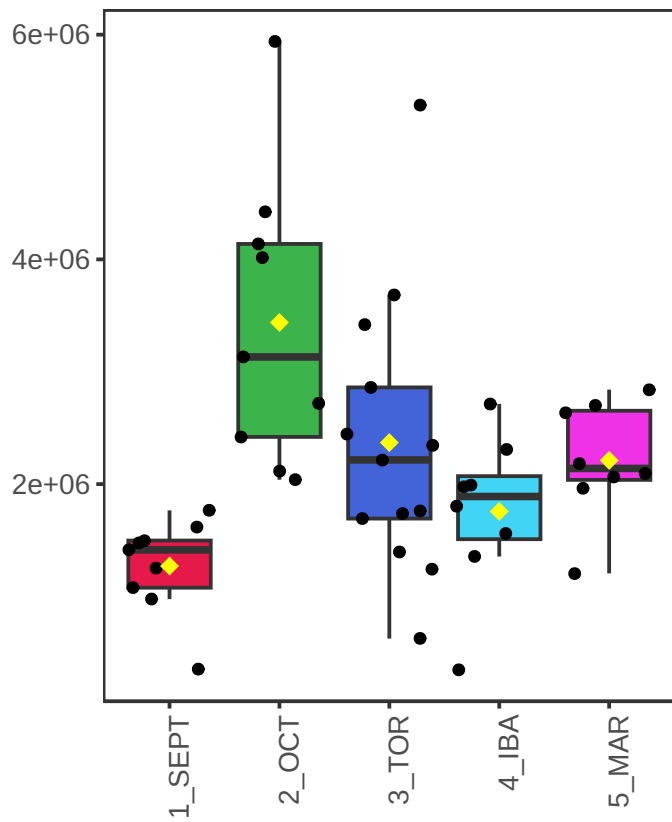

Normalized Conc.

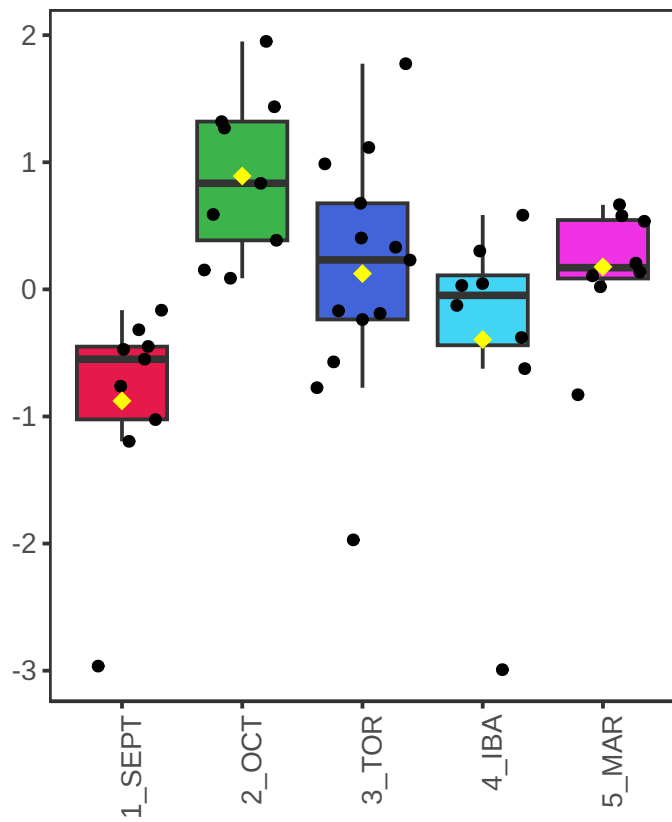

# Isoleucine

## Original Conc.

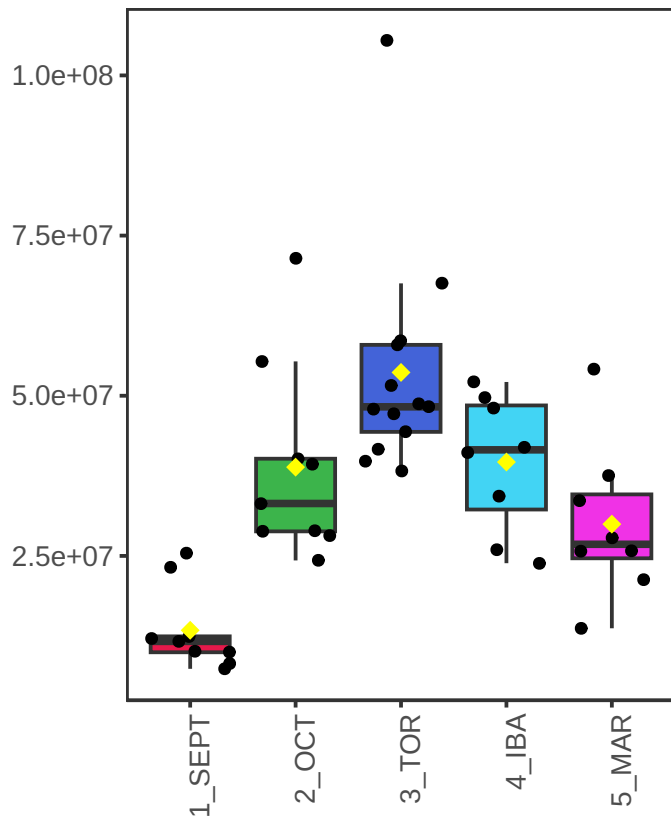

## Normalized Conc.

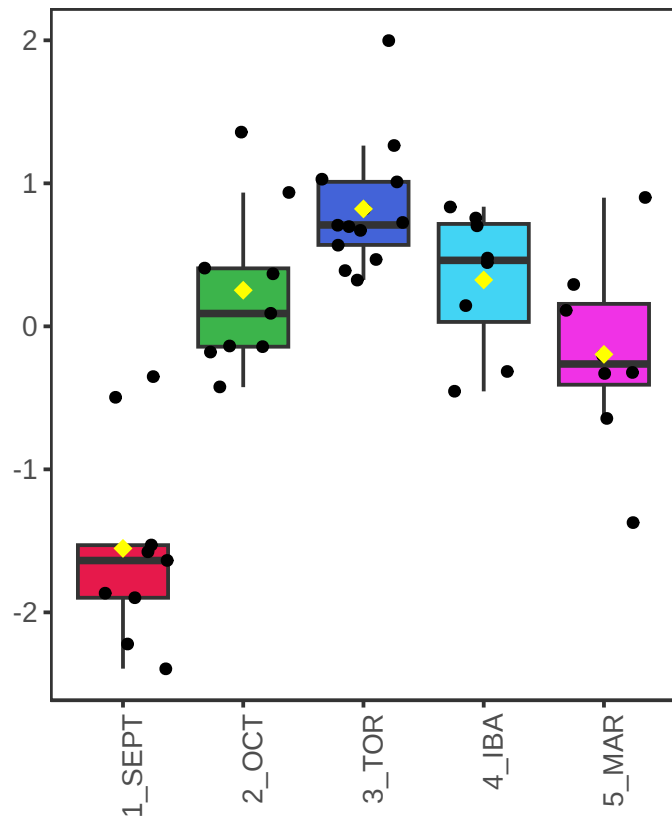

# Kynurenine

Original Conc.

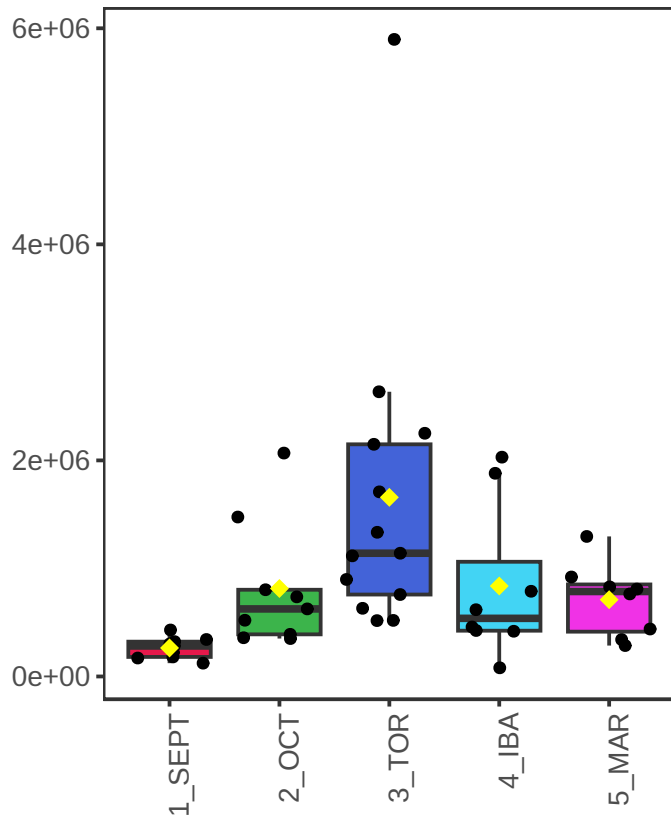

Normalized Conc.

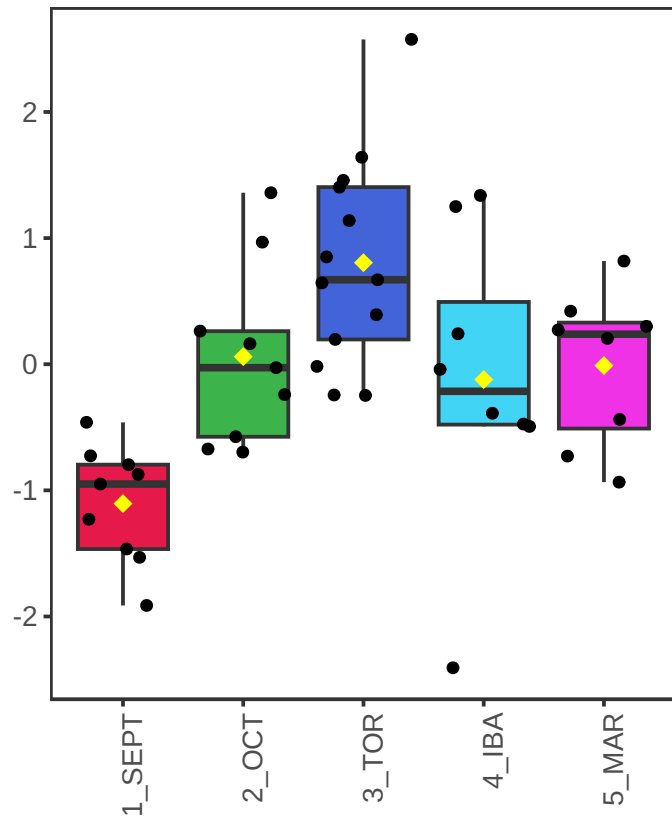

# Lactose

Original Conc.

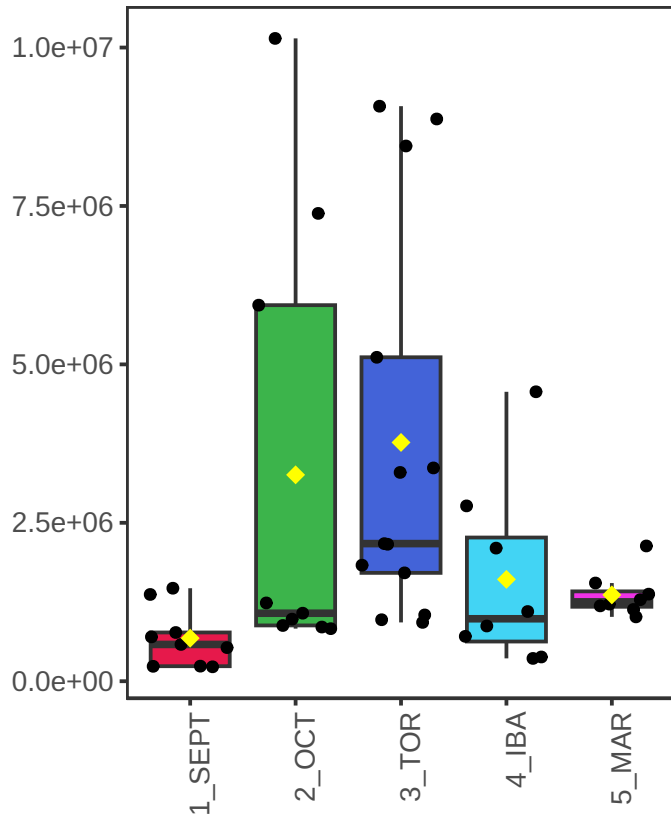

Normalized Conc.

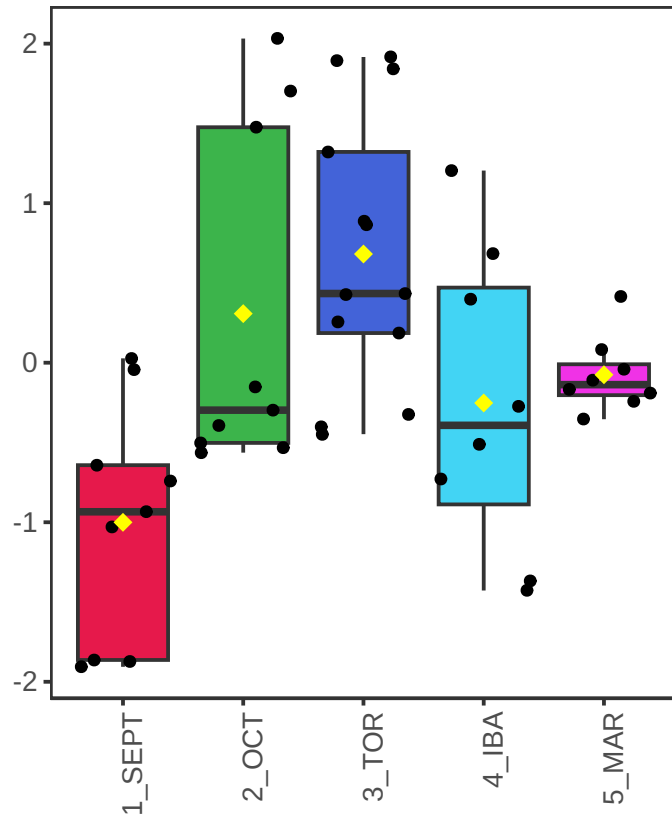

# Leucine

Original Conc.

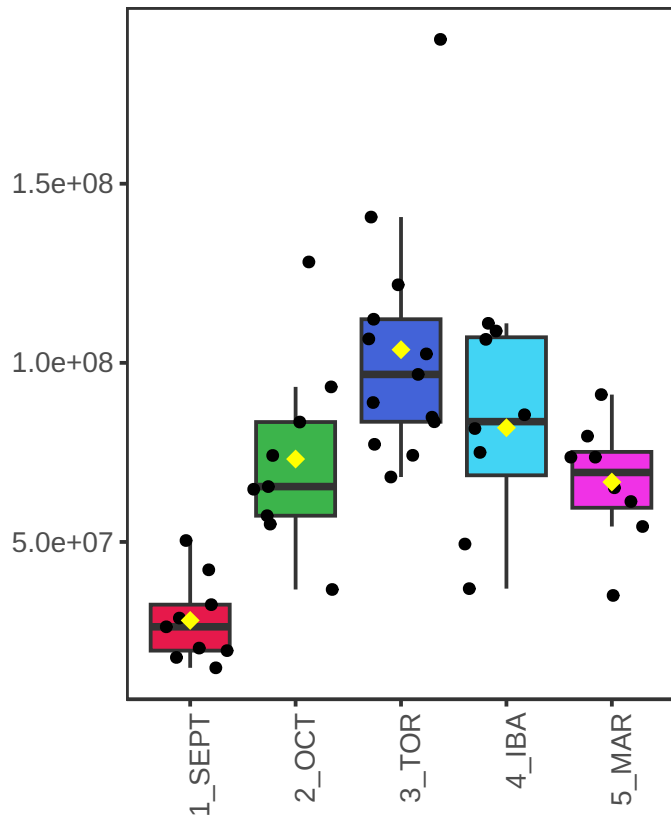

Normalized Conc.

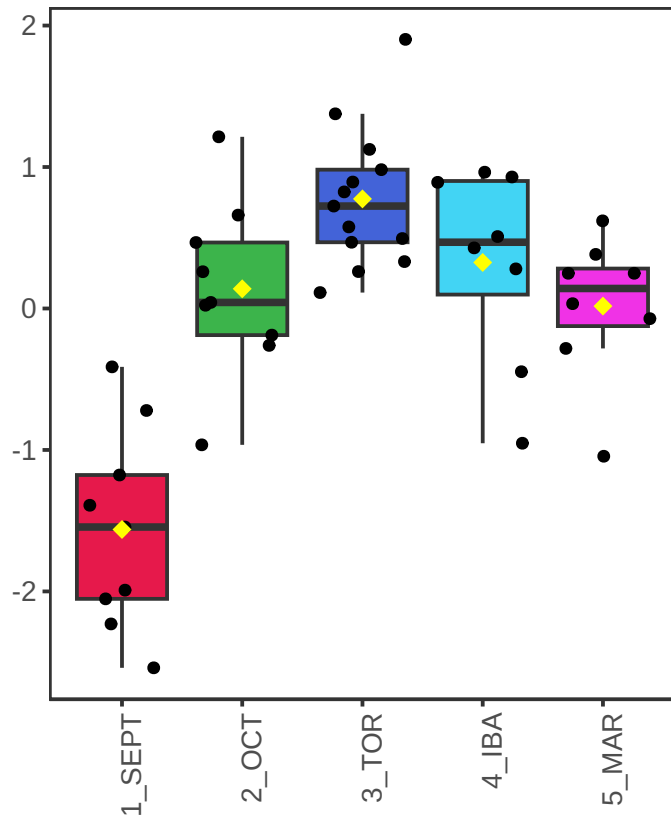



# Linoleyl carnitine

Original Conc.

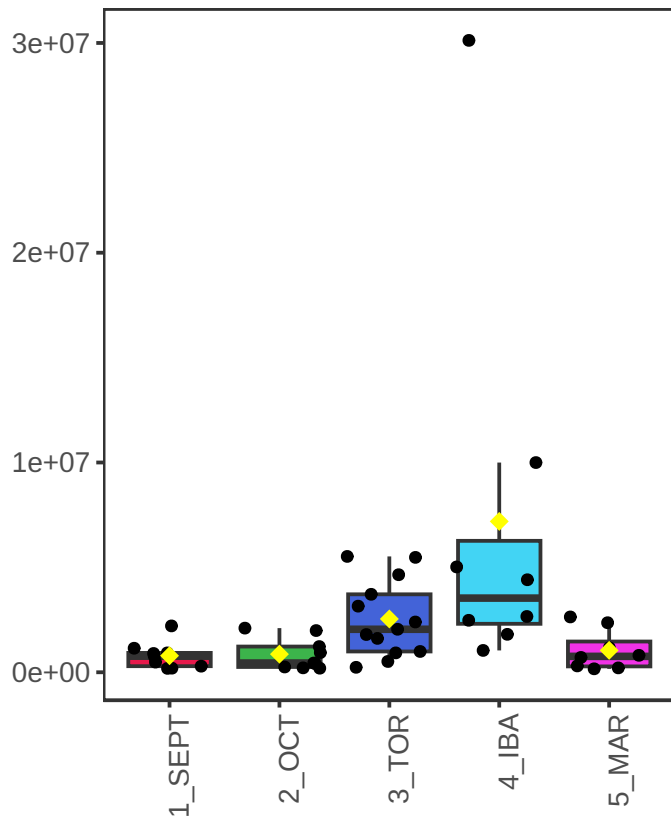

Normalized Conc.

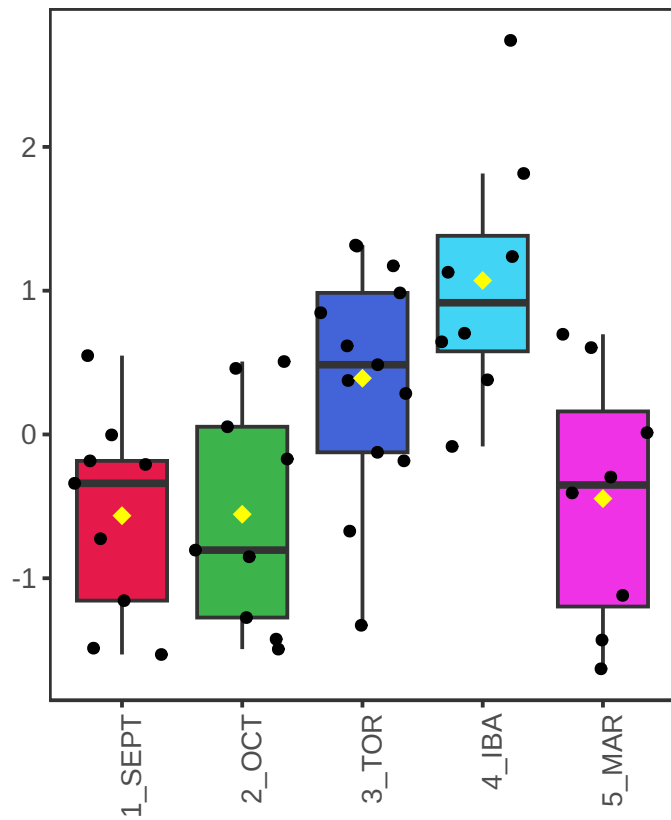

# Lysine

Original Conc.

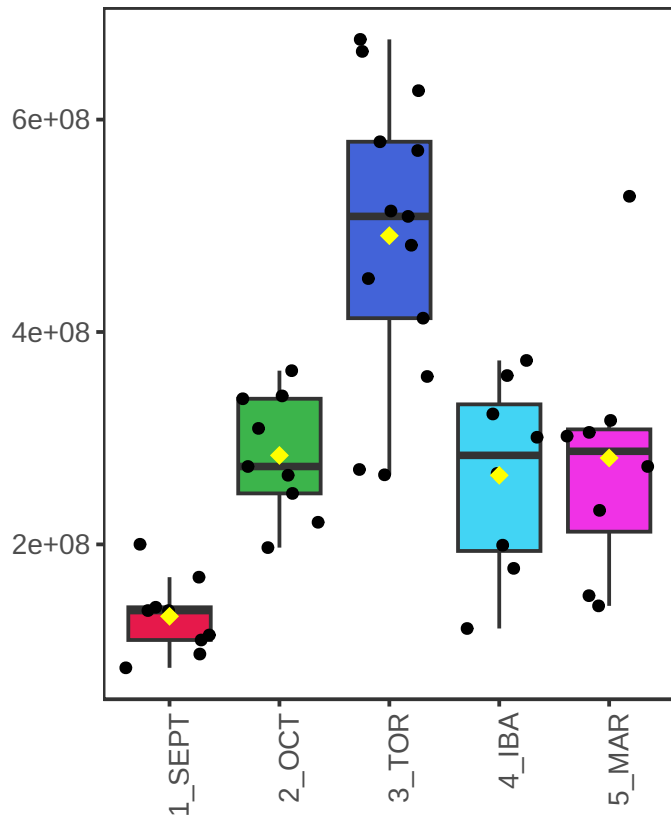

Normalized Conc.

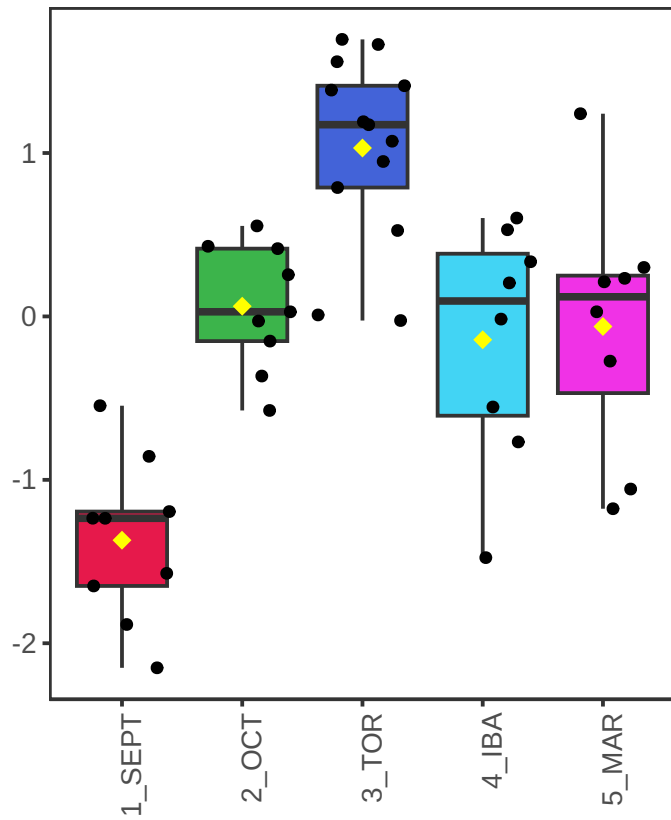

# Lys-leu

Original Conc.

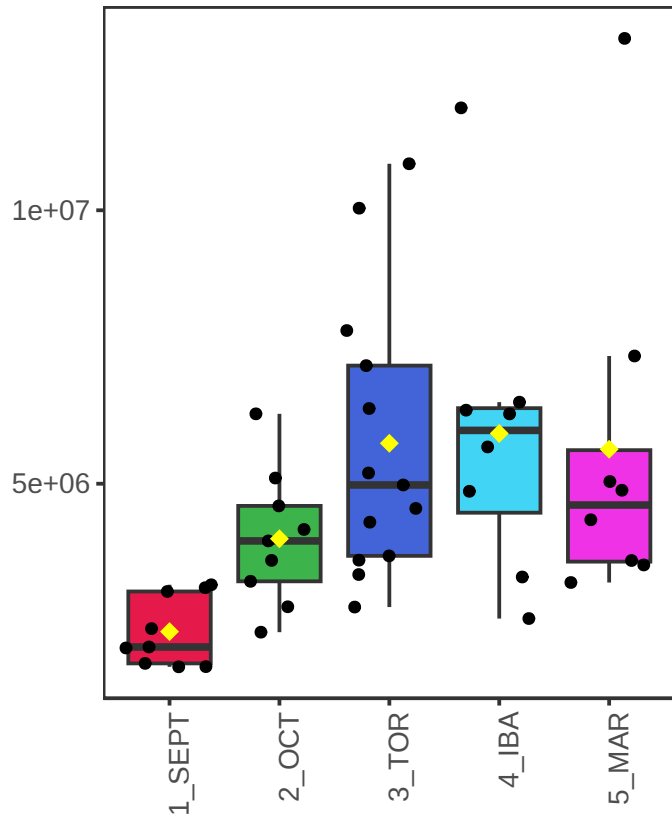

Normalized Conc.

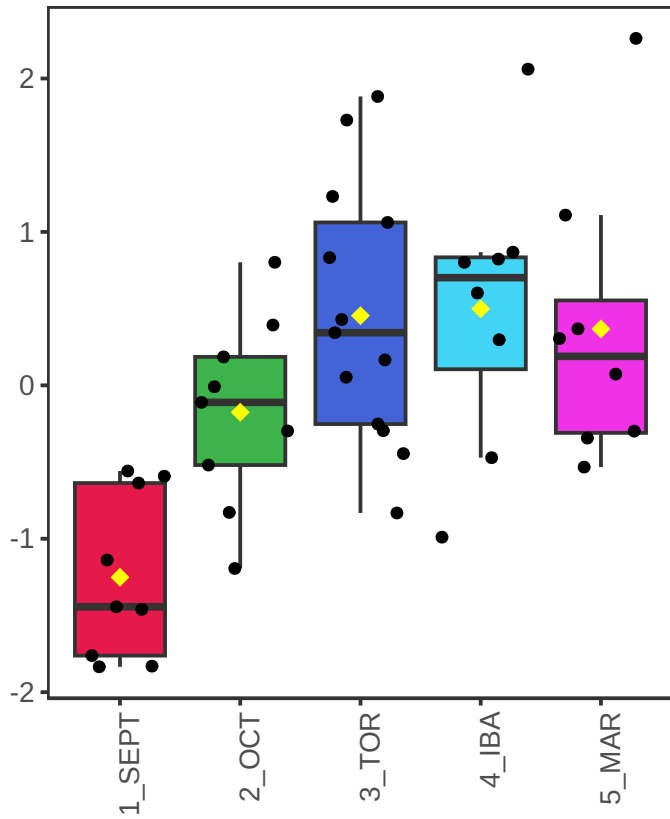

# Maltose

Original Conc.

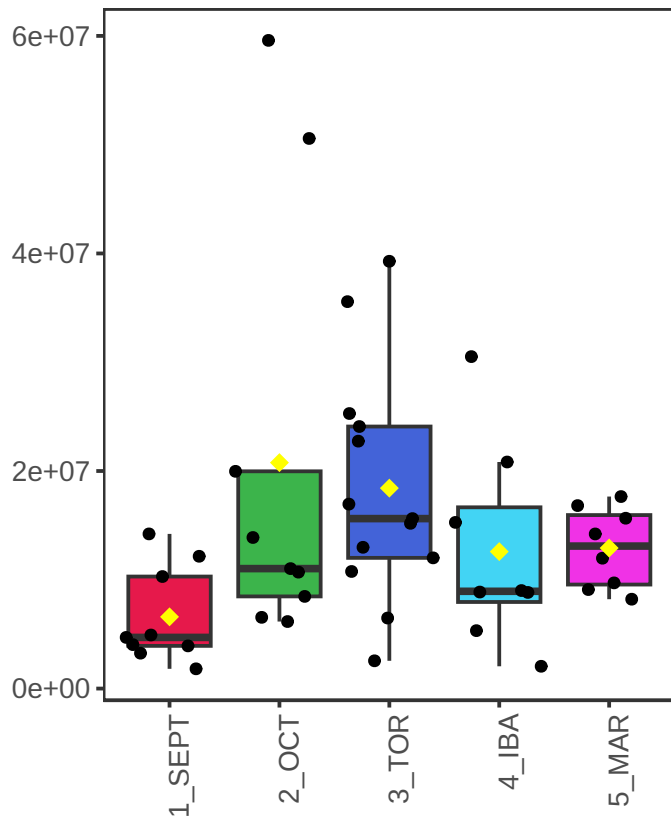

Normalized Conc.

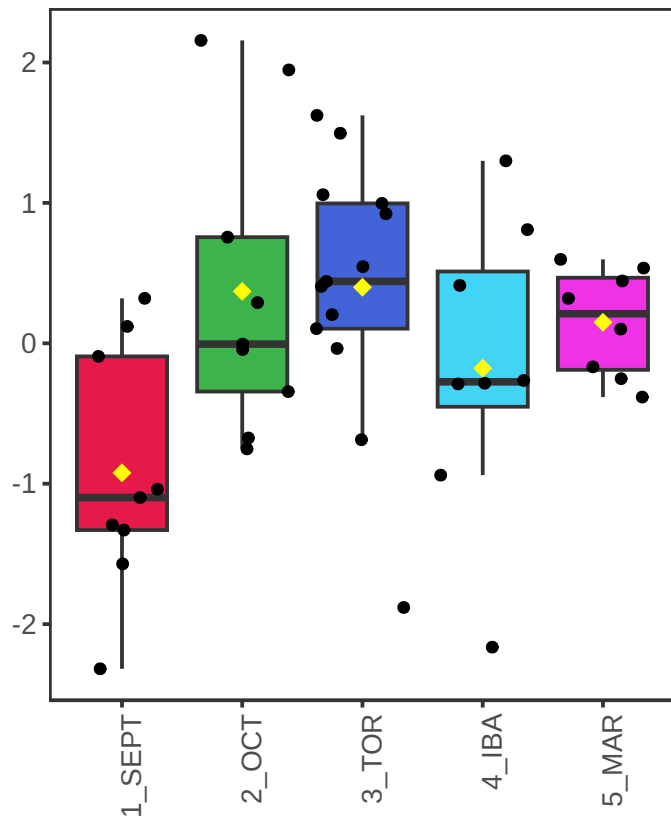

# Methionine

Original Conc.

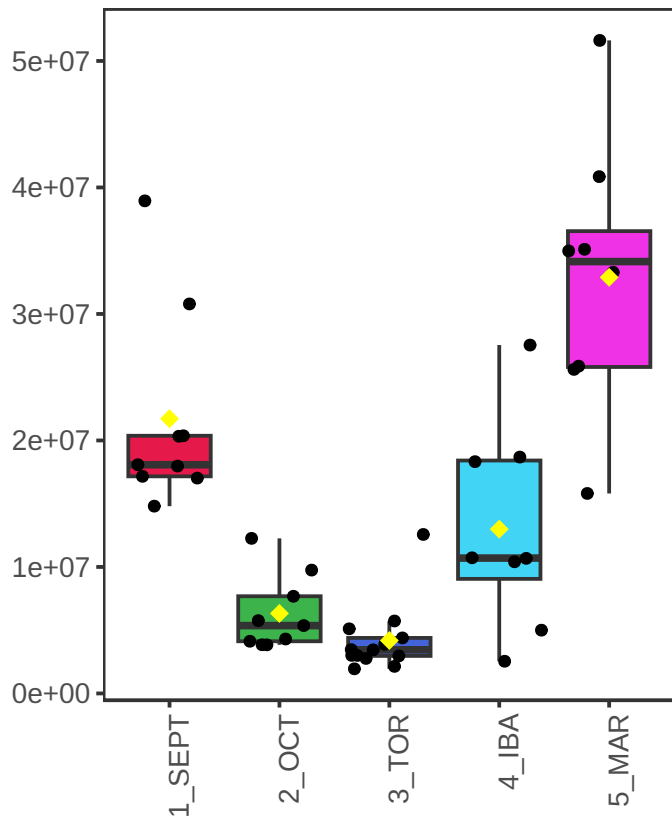

Normalized Conc.

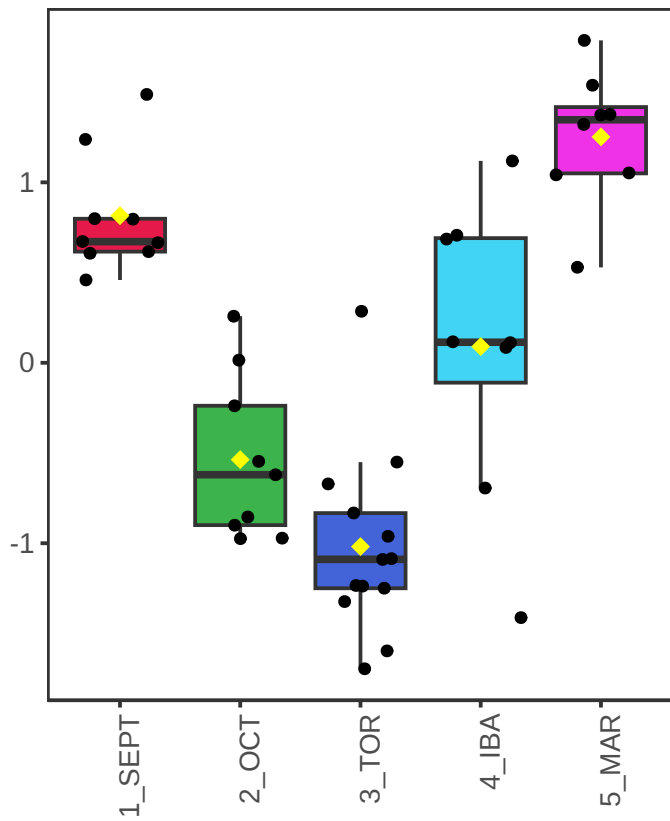

# Methionine sulfoxide

Original Conc.

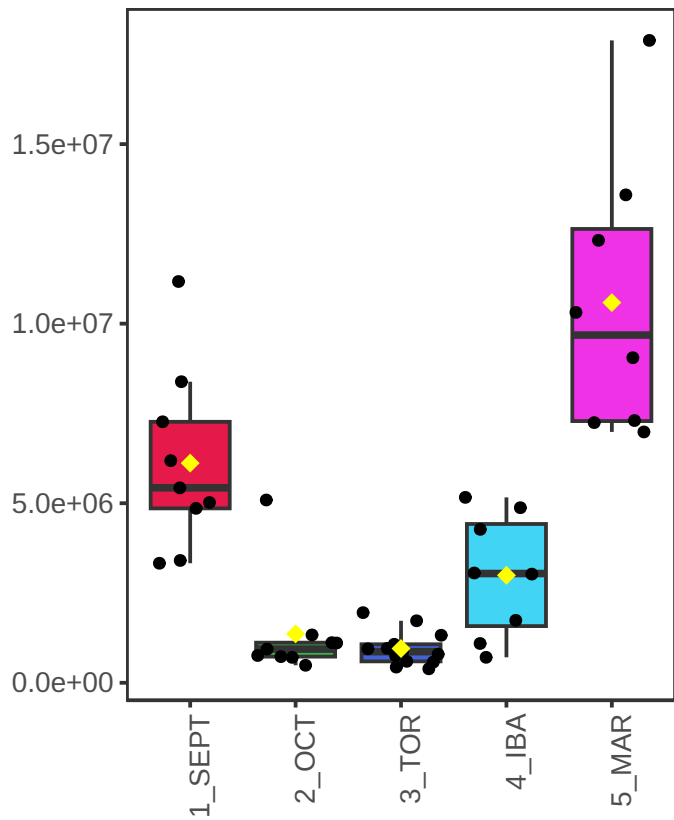

Normalized Conc.

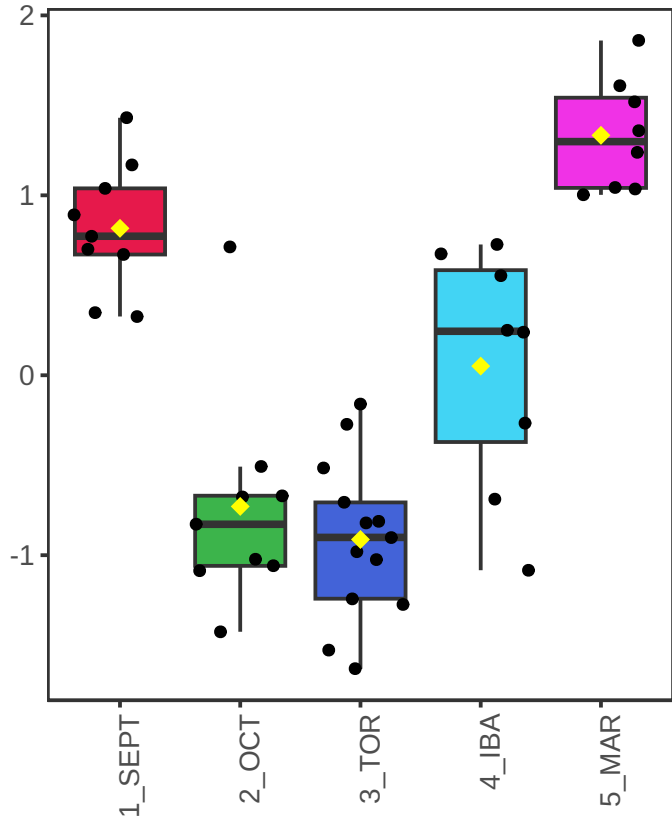

# Methylenediurea

Original Conc.

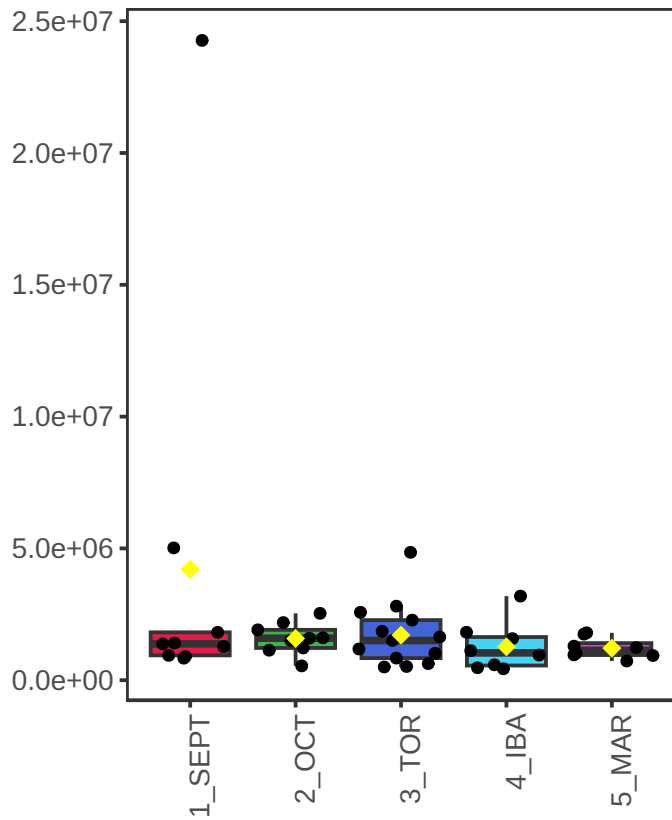

Normalized Conc.

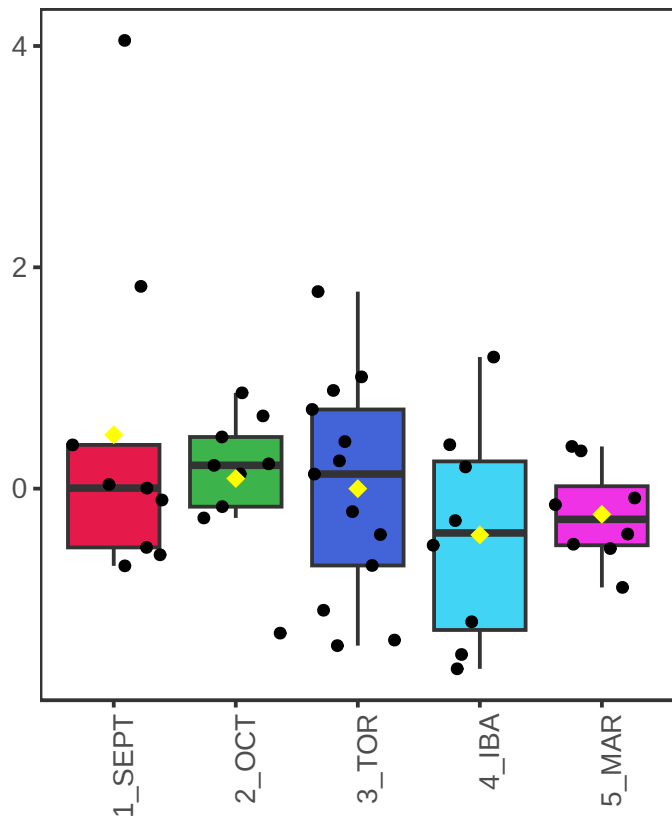

# Methylguanidine

Original Conc.

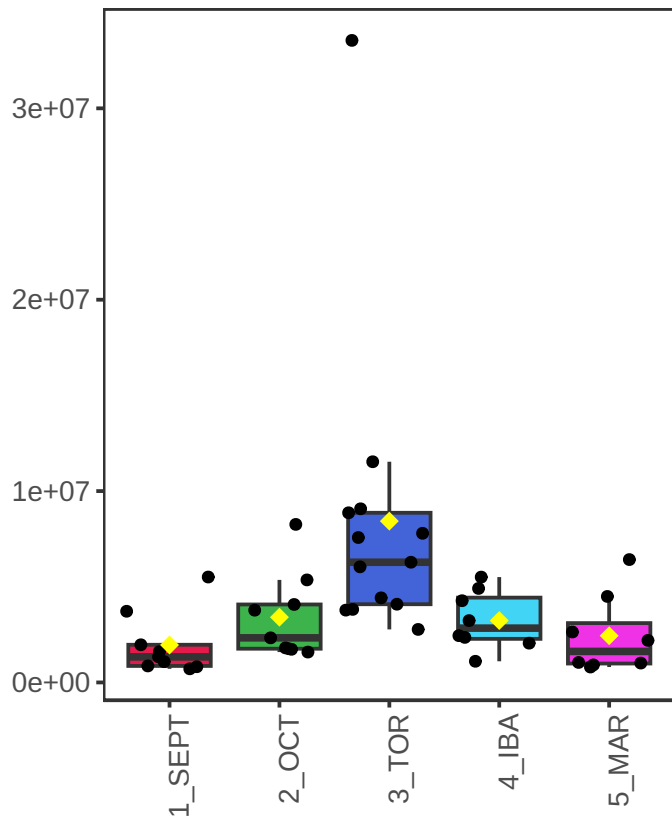

Normalized Conc.

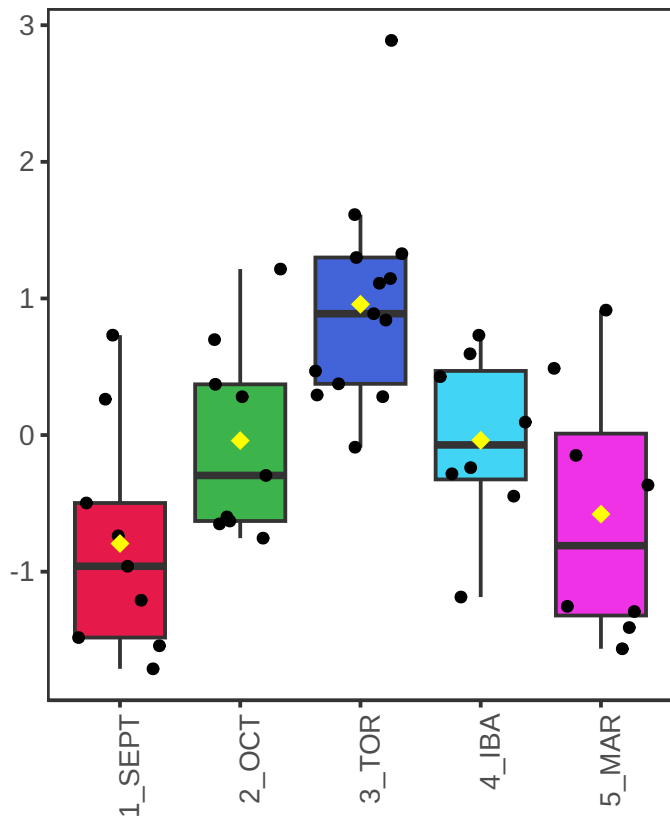



# Methylimidazoleacetic acid

Original Conc.

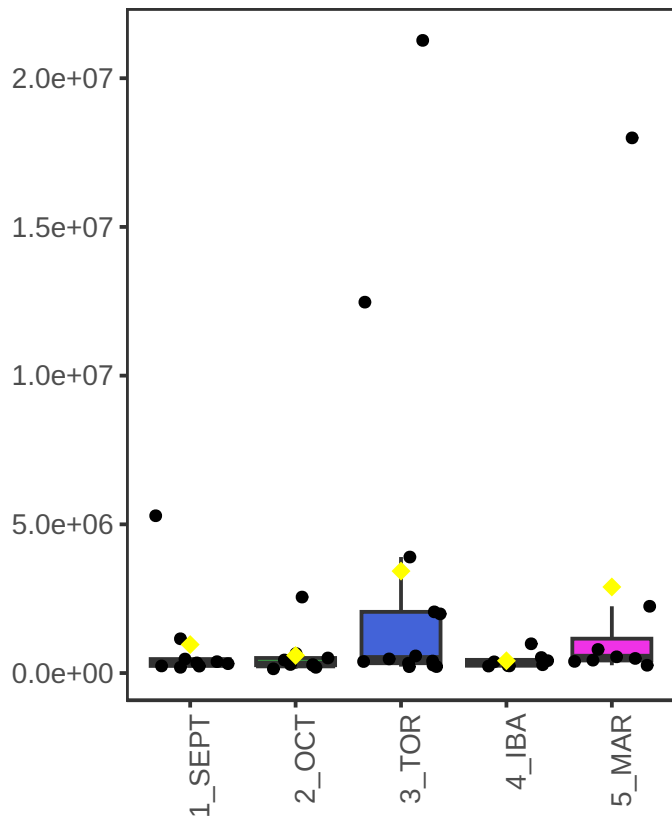

Normalized Conc.

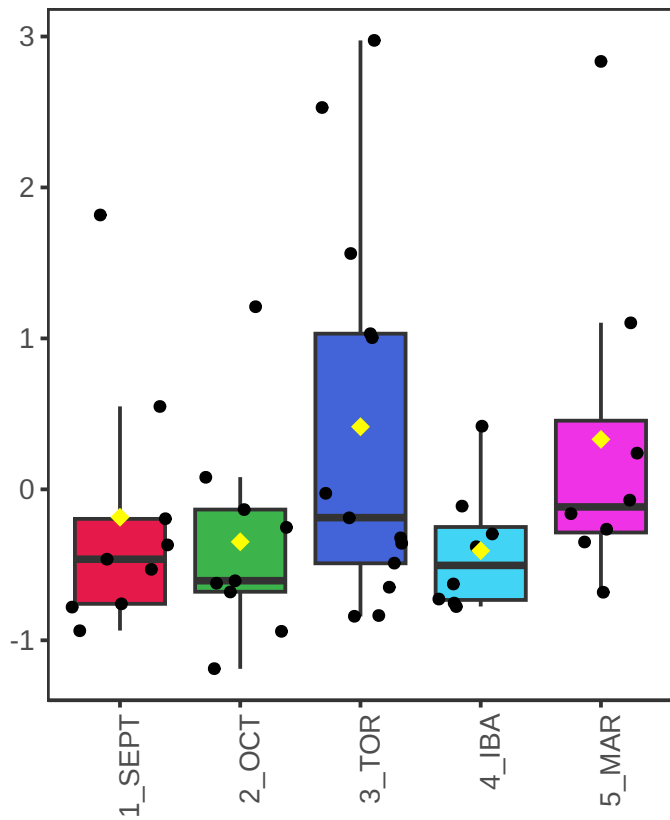

# N-(2-Hydroxyethyl)glutamine

Original Conc.

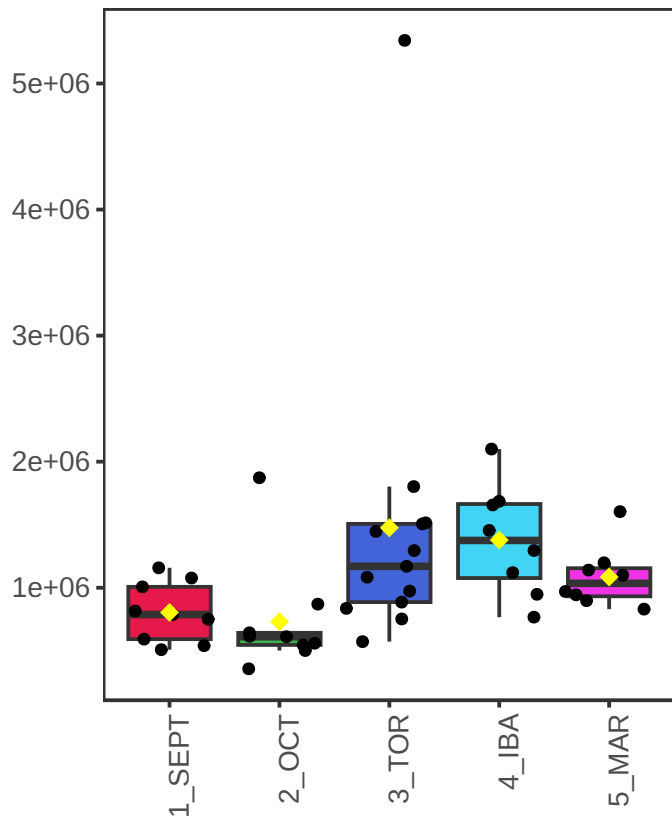

Normalized Conc.

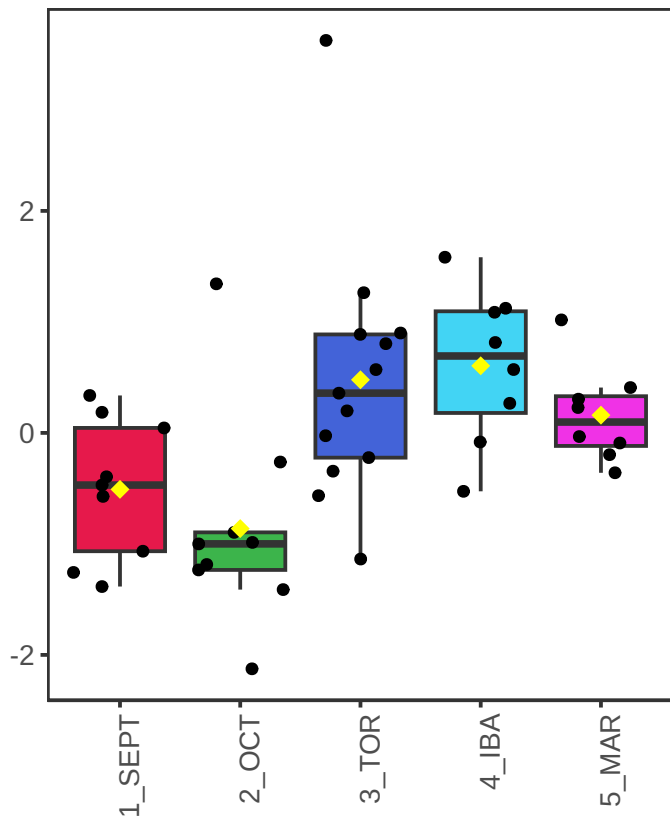

# N3,N4-Dimethylarginine

Original Conc.

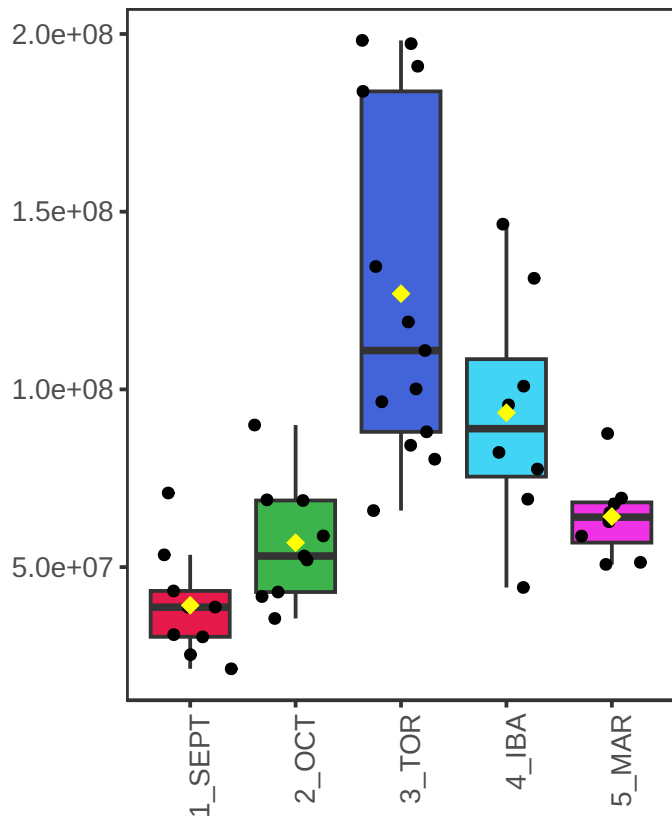

Normalized Conc.

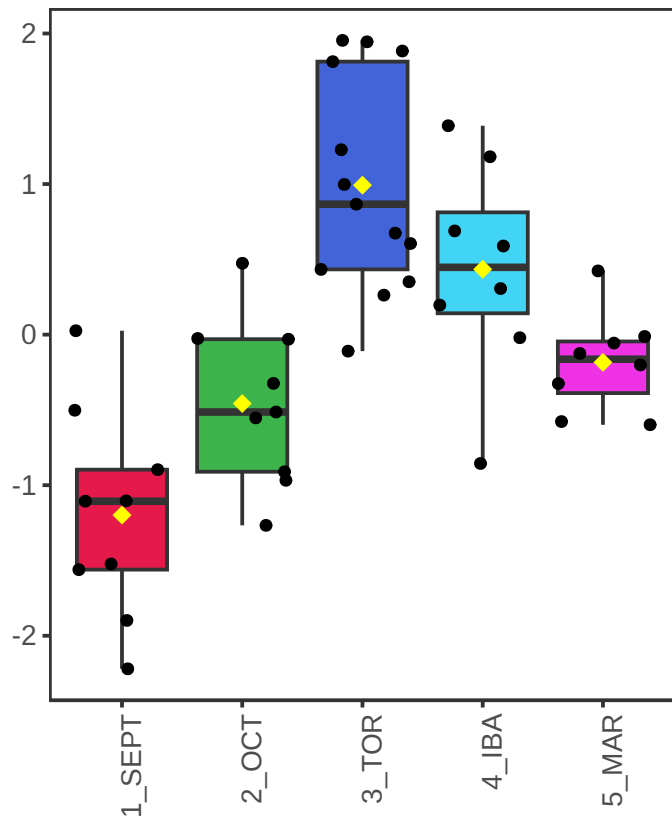

# N8-Acetylspemidine

Original Conc.

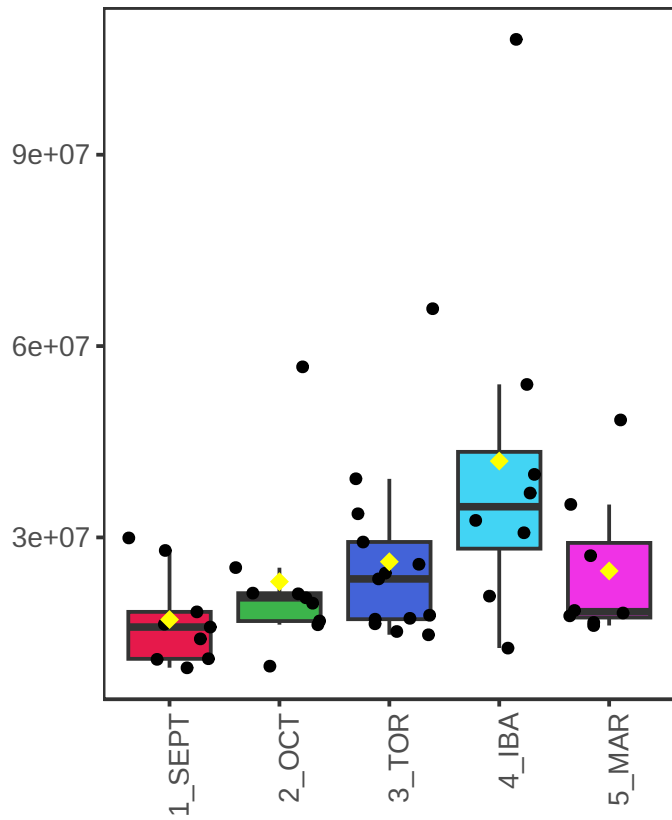

Normalized Conc.

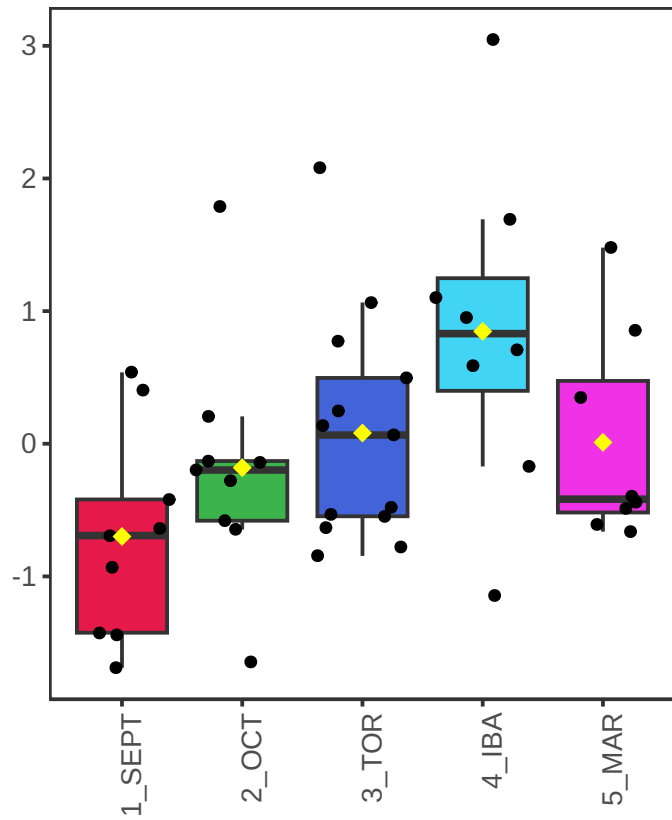

# N-(3,4-Dihydroxyphenyl)glutamine

Original Conc.

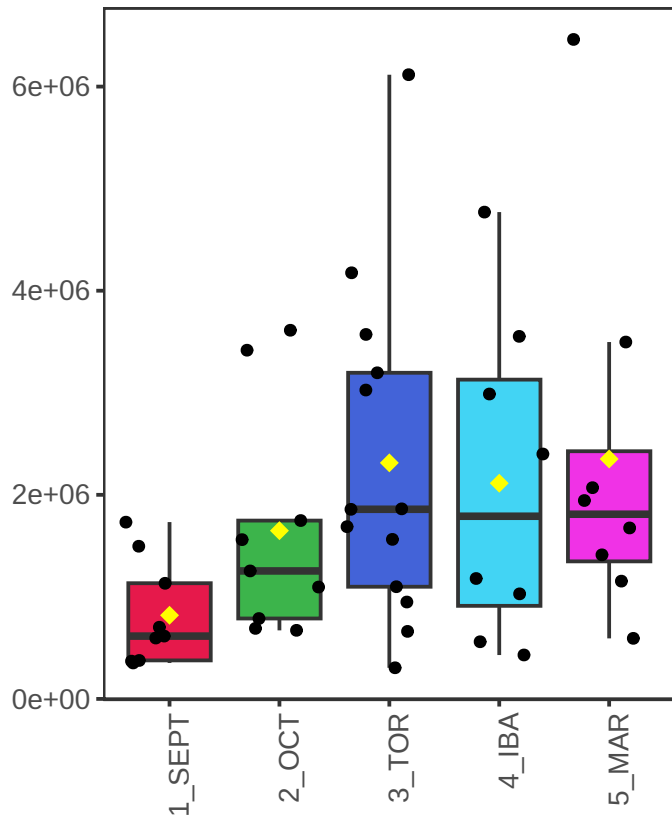

Normalized Conc.

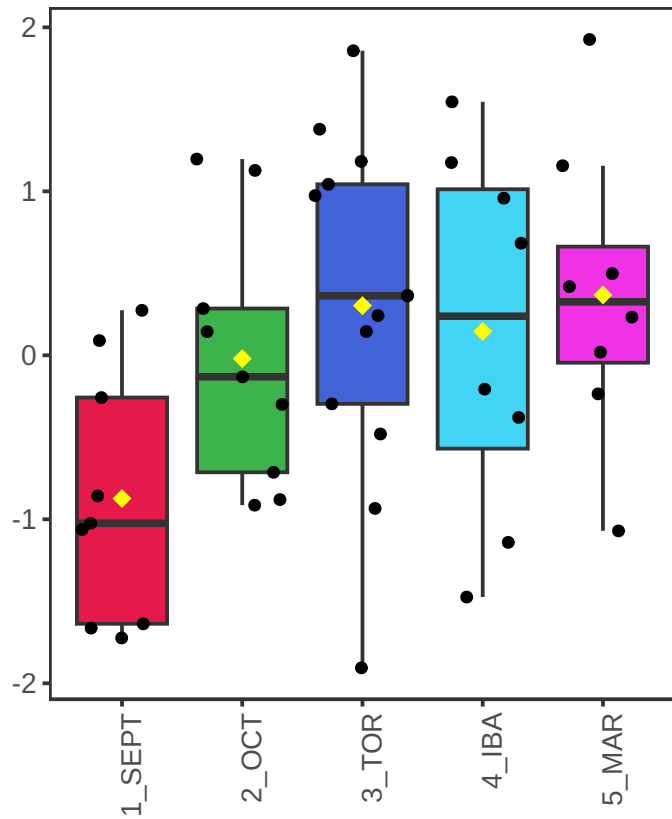

# N-Acetylputrescine

Original Conc.

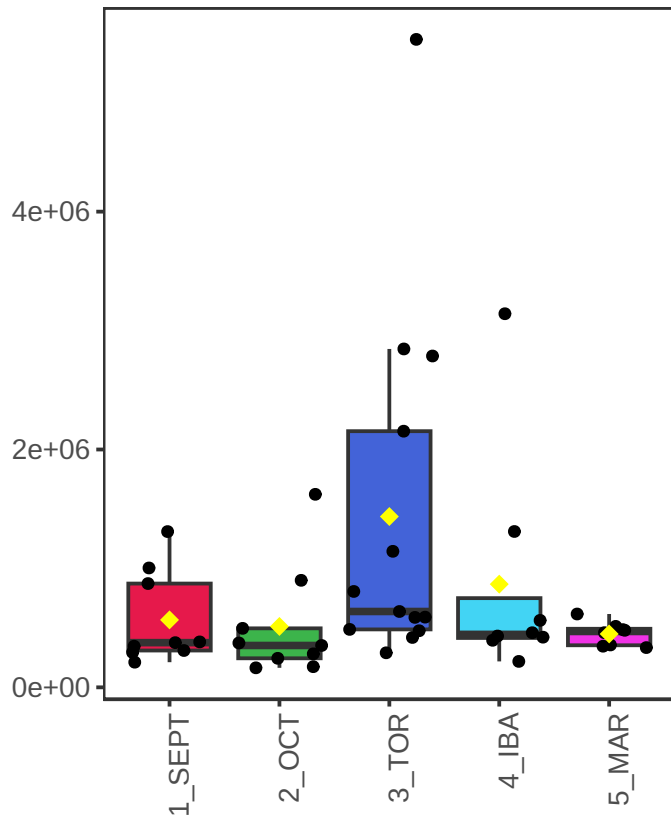

Normalized Conc.

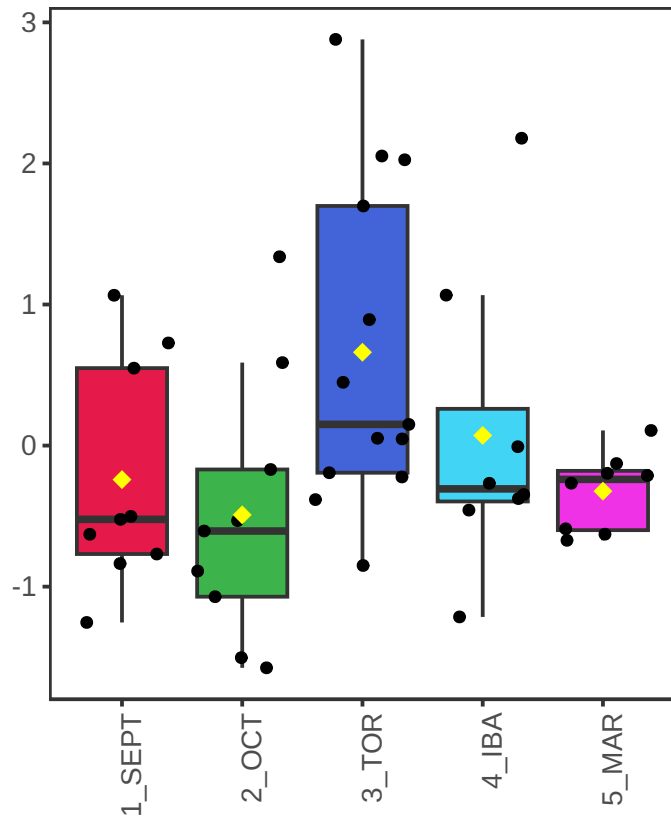

# N-Acetyserotonin

Original Conc.

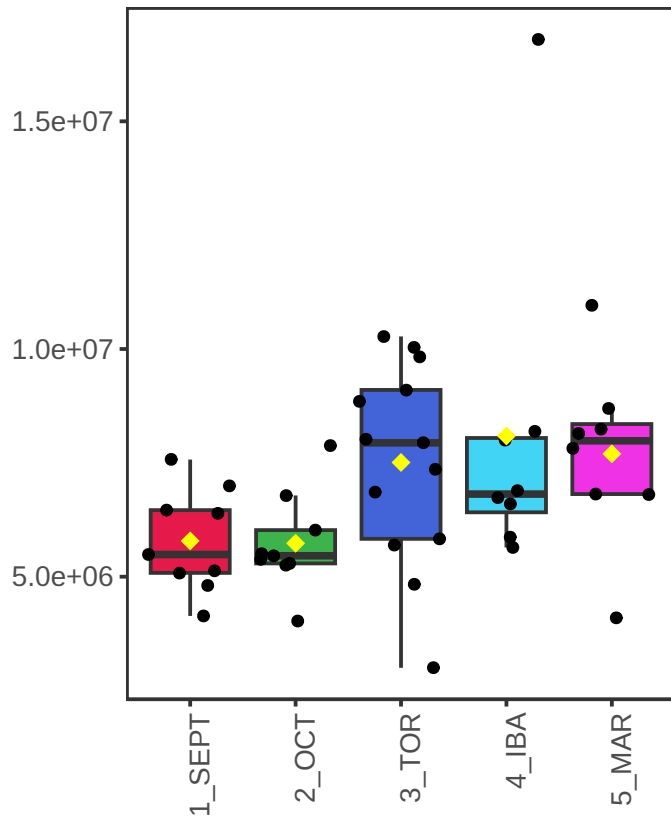

Normalized Conc.

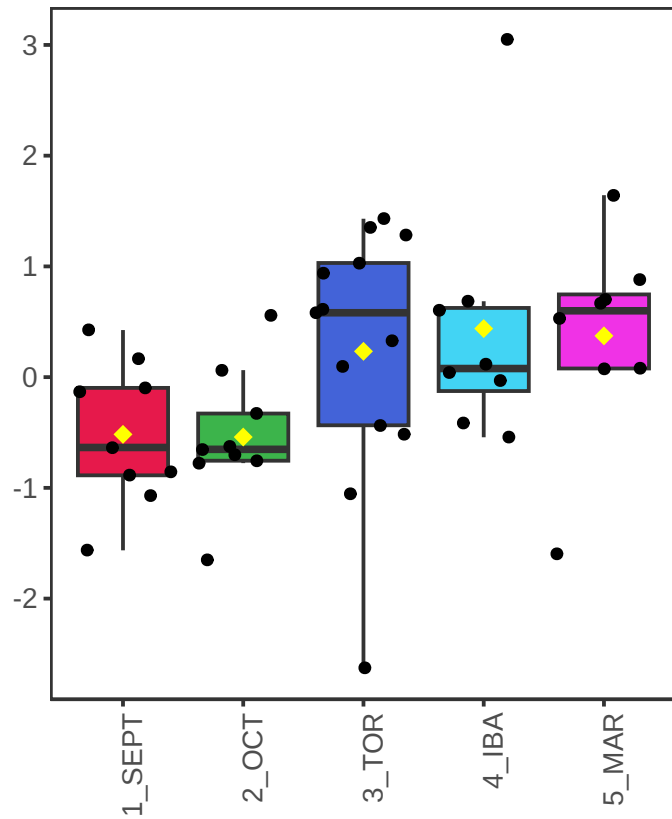

# N-Lactoyl ethanolamine

Original Conc.

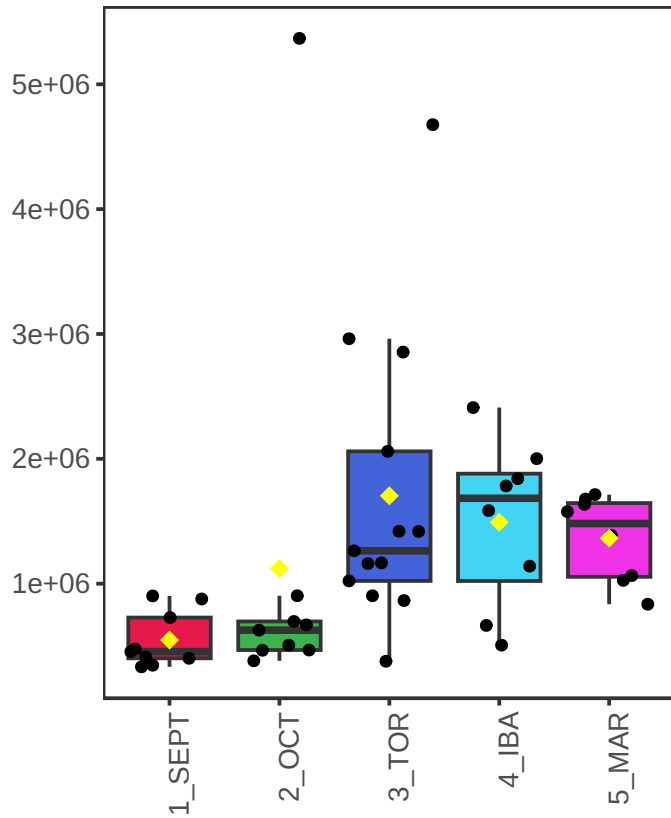

Normalized Conc.

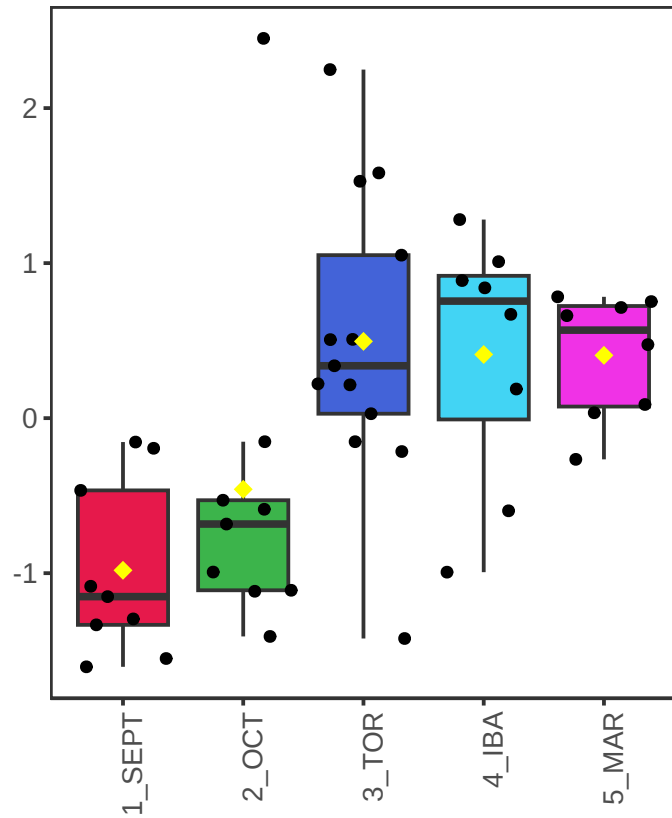



# Nicotinamide 1-oxide

Original Conc.

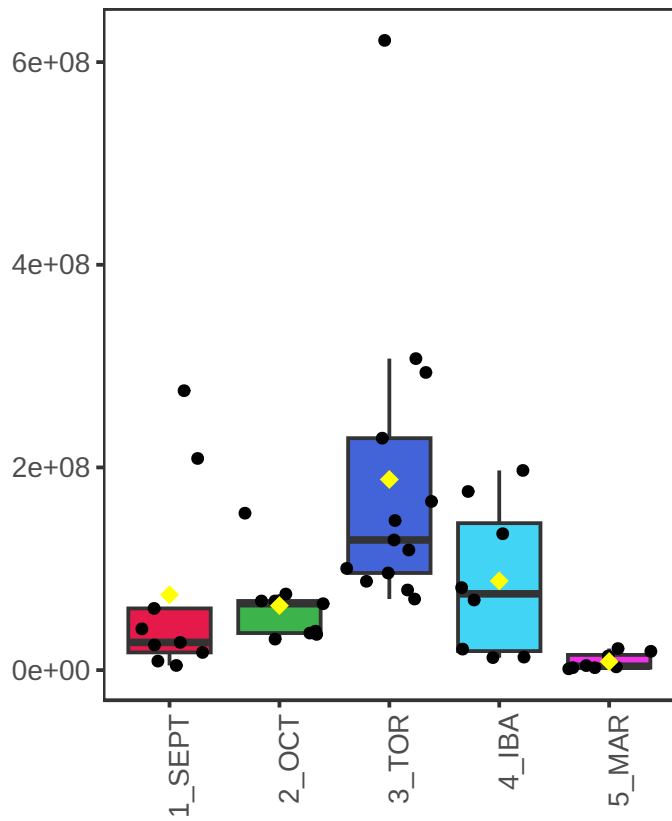

Normalized Conc.

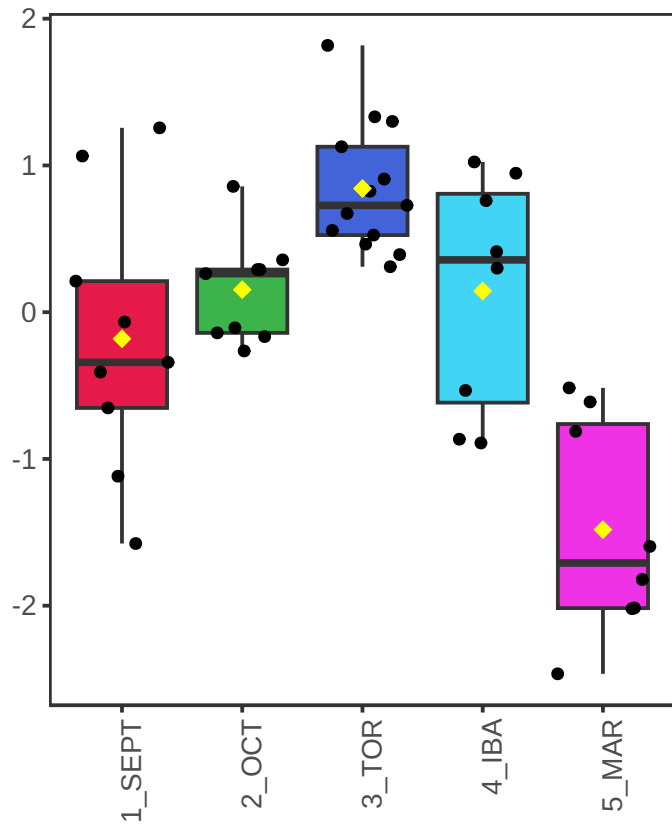

# Nicotinic acid

Original Conc.

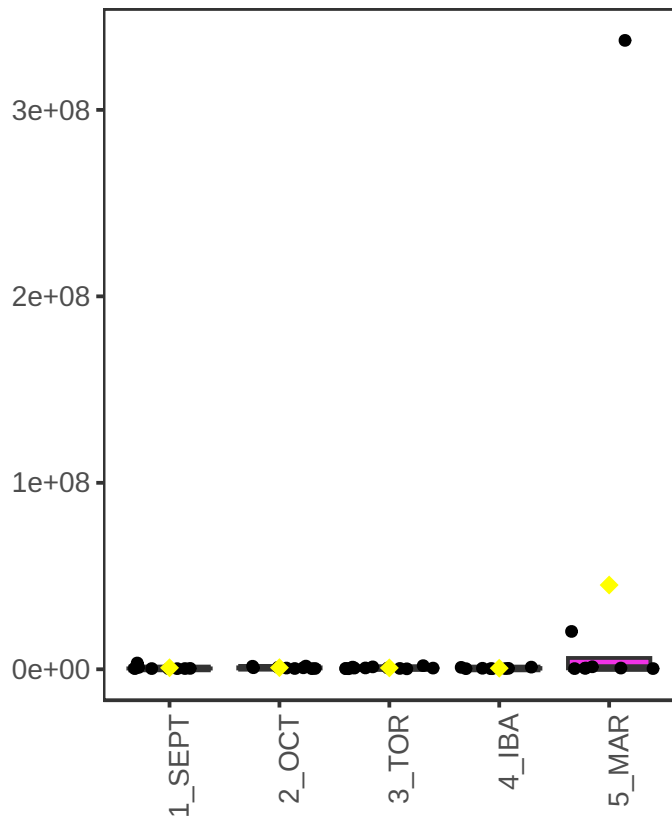

Normalized Conc.

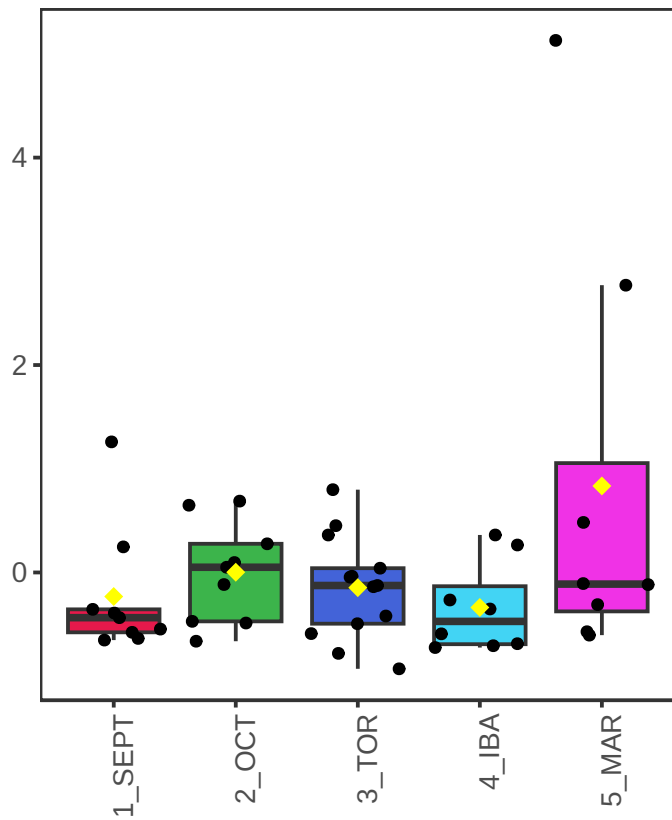

# N-Isobutyrylacetamide

Original Conc.

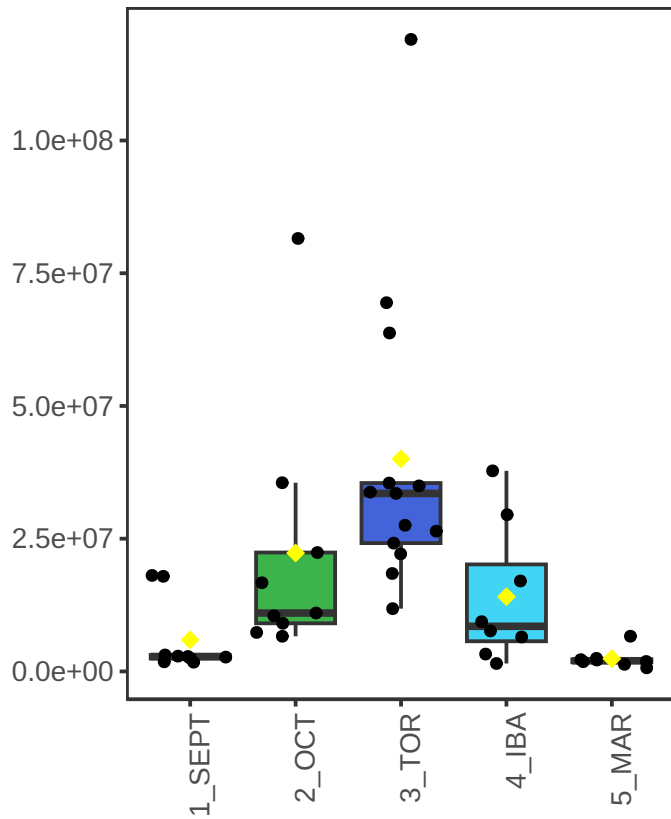

Normalized Conc.

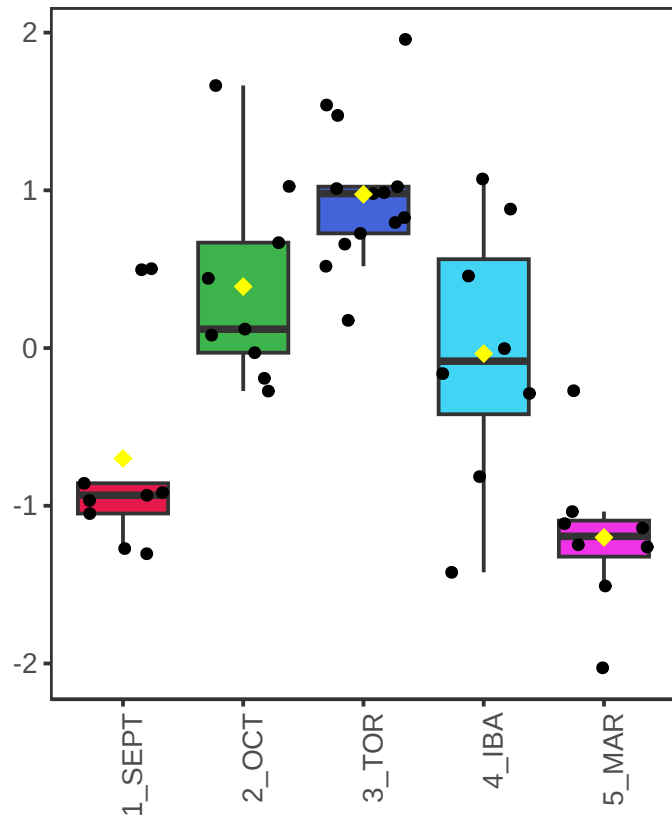

# N-Methylhistamine

Original Conc.

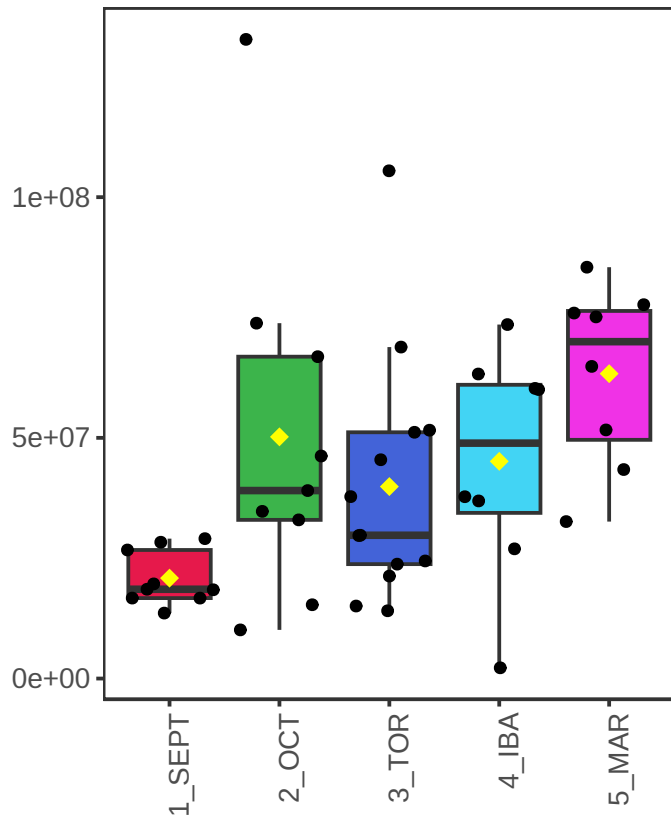

Normalized Conc.

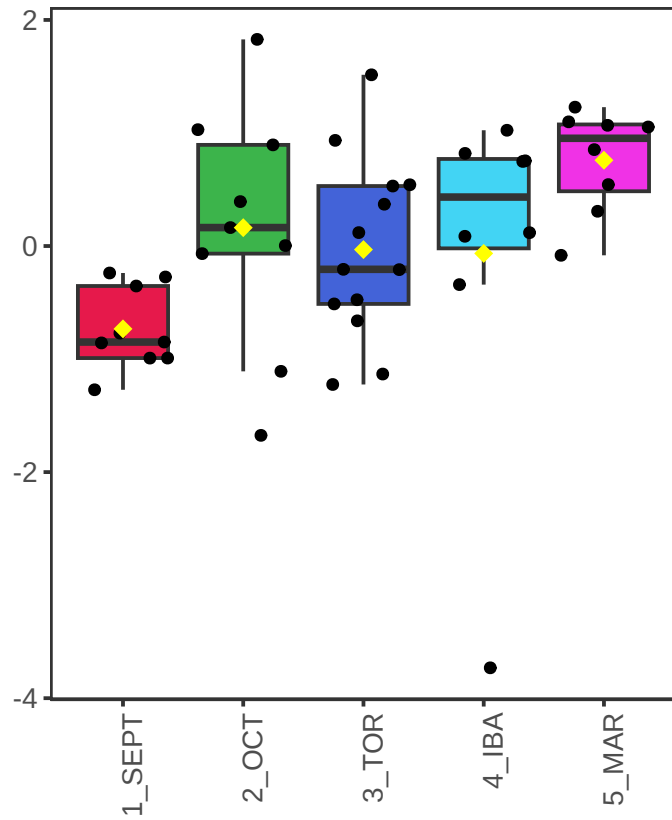

# N-Nonanoylglycine

Original Conc.

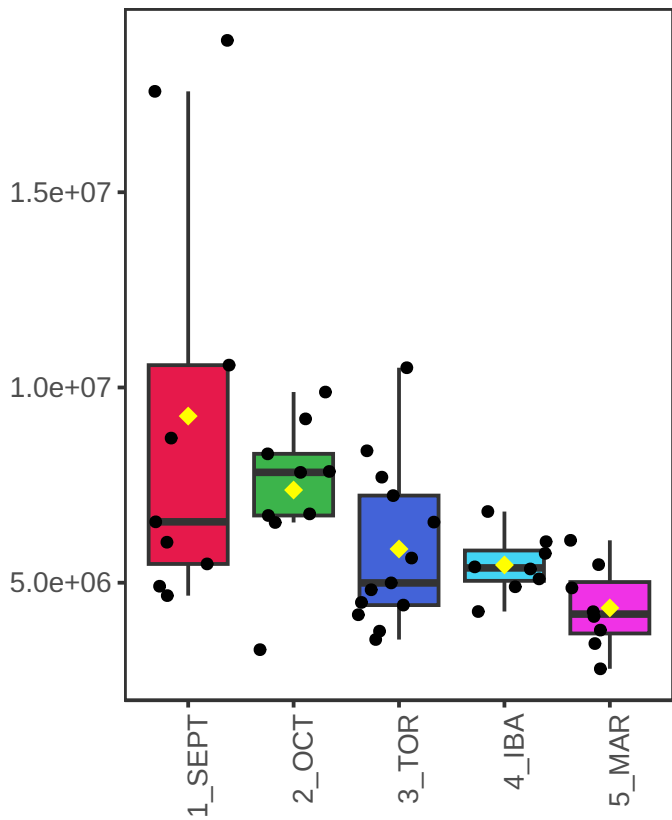

Normalized Conc.

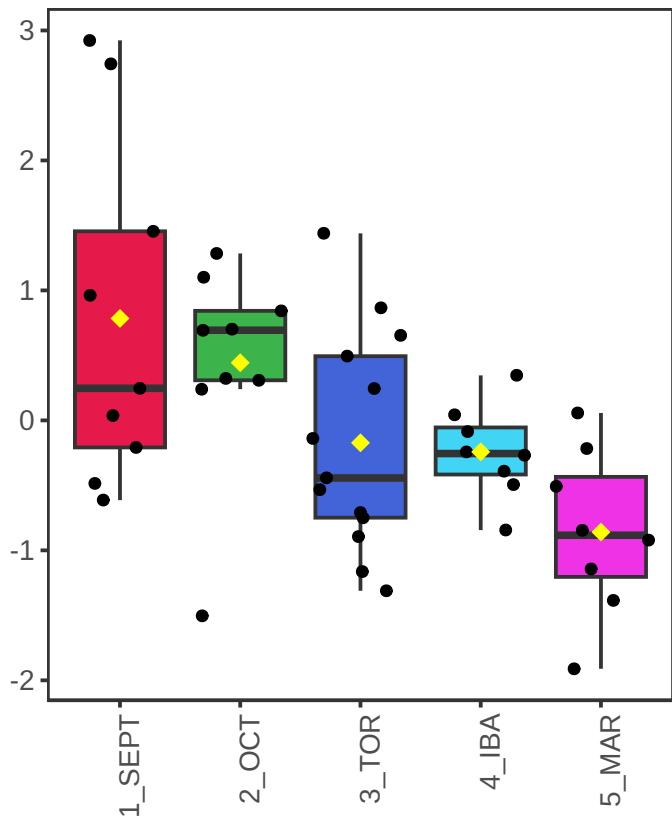

# N-Propionylmethionine

Original Conc.

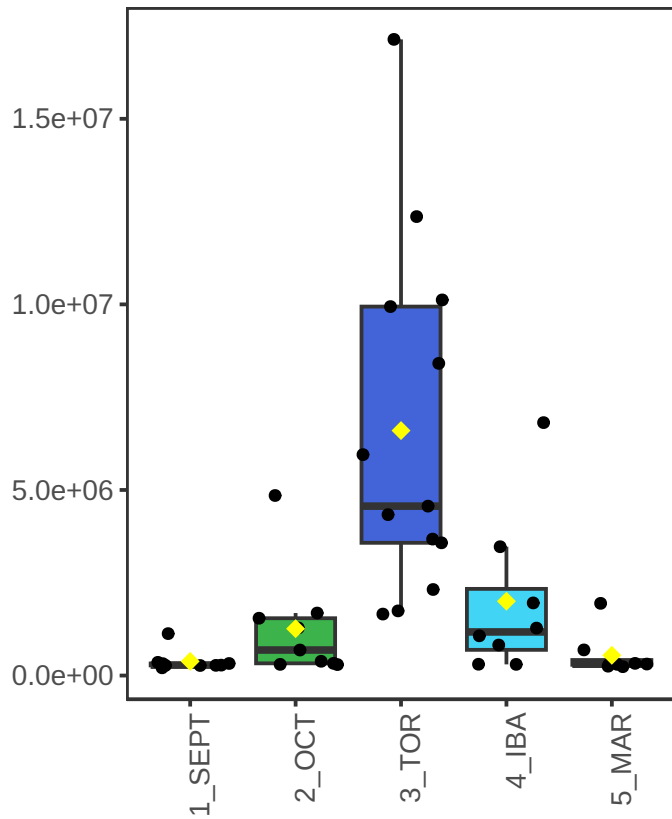

Normalized Conc.

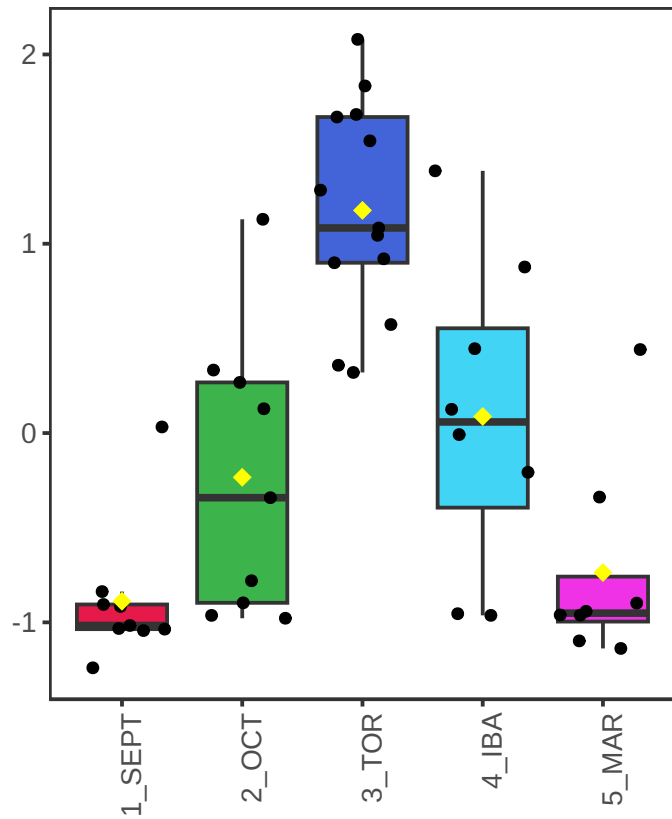

# N-Succinyl-L,L-2,6-diaminopimelate

Original Conc.

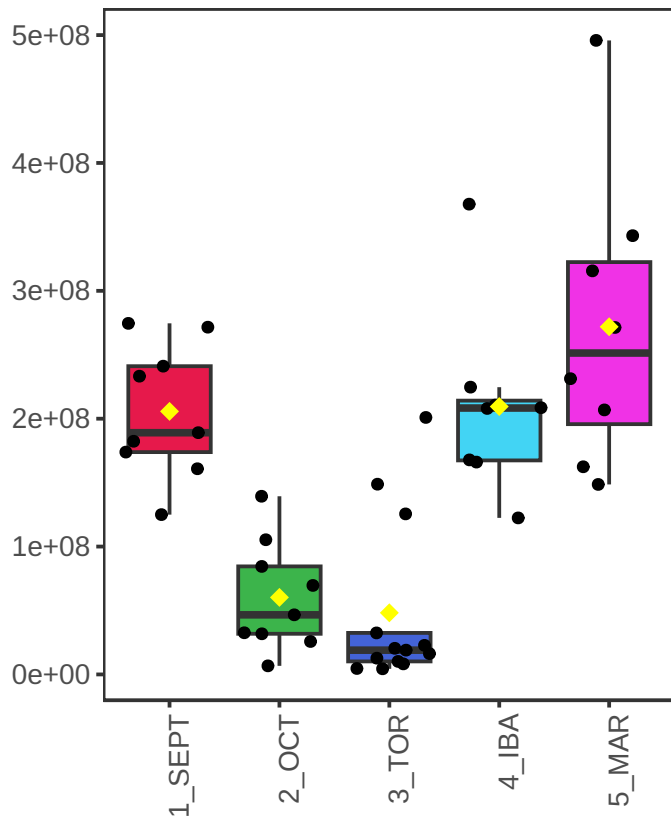

Normalized Conc.

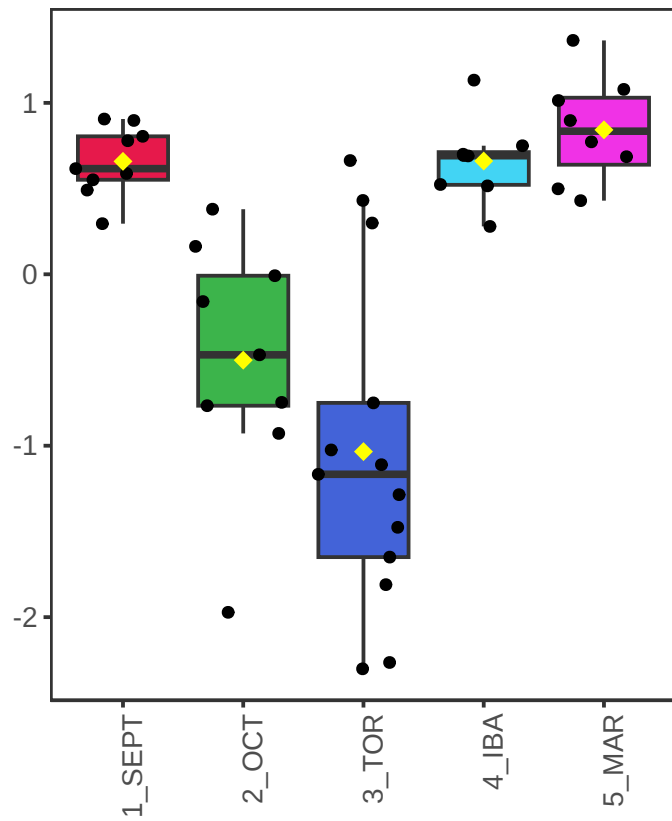

# N-(tert-Butoxycarbonyl)leucine

Original Conc.

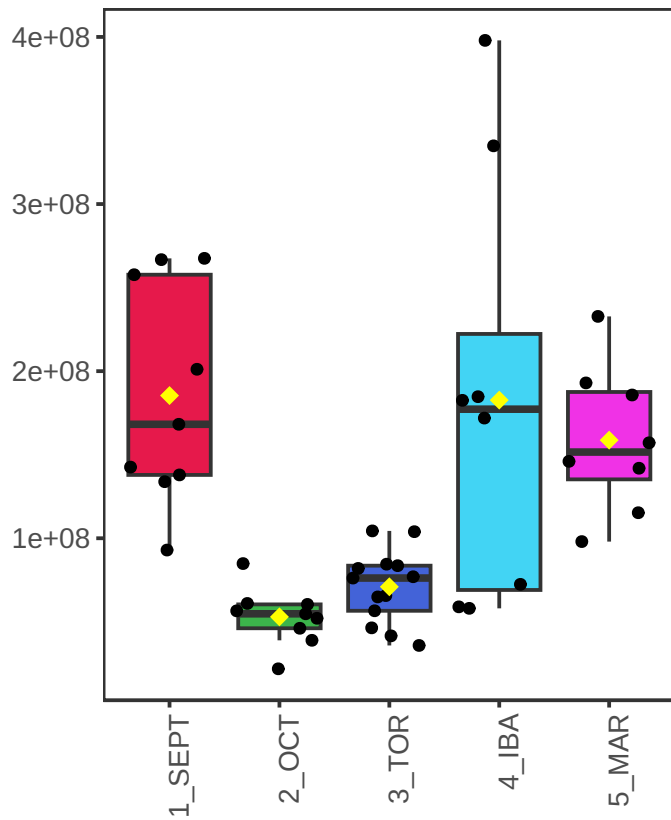

Normalized Conc.

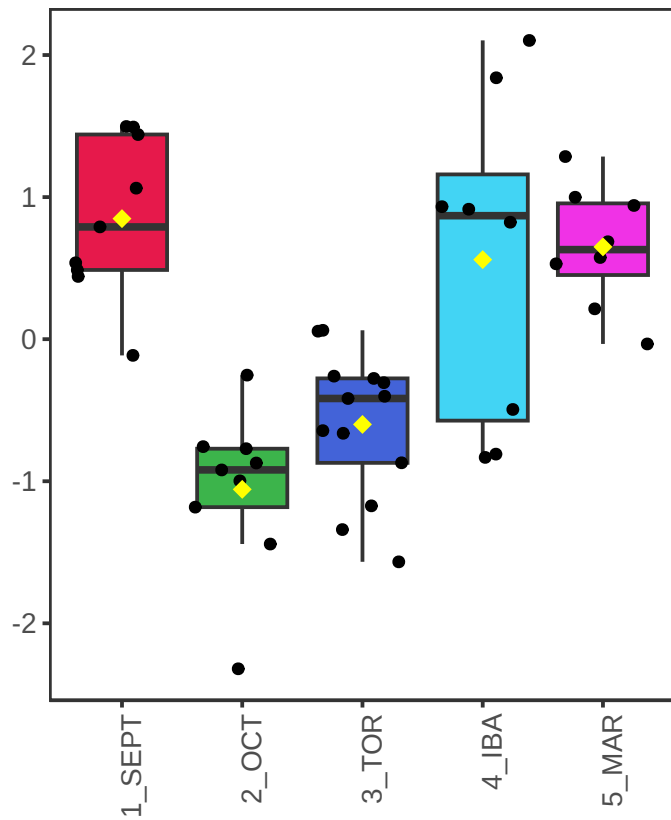



# N6,N6,N6-Trimethyllysine

Original Conc.

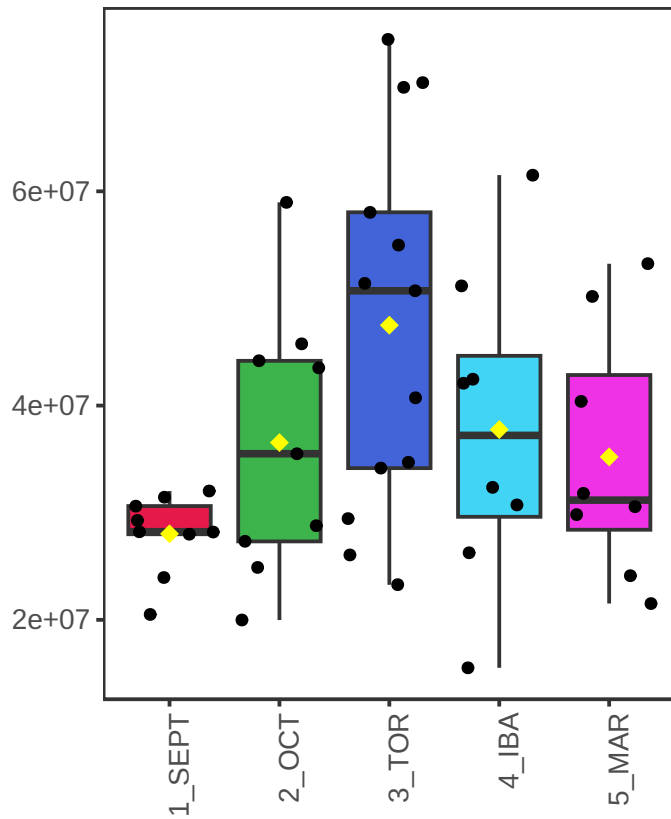

Normalized Conc.

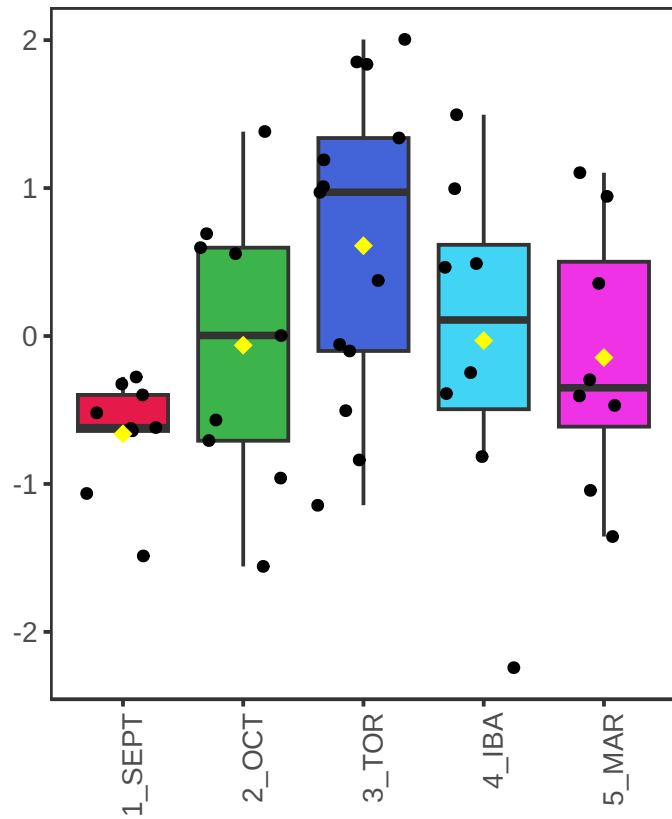

# N-Undecanoylglycine

Original Conc.

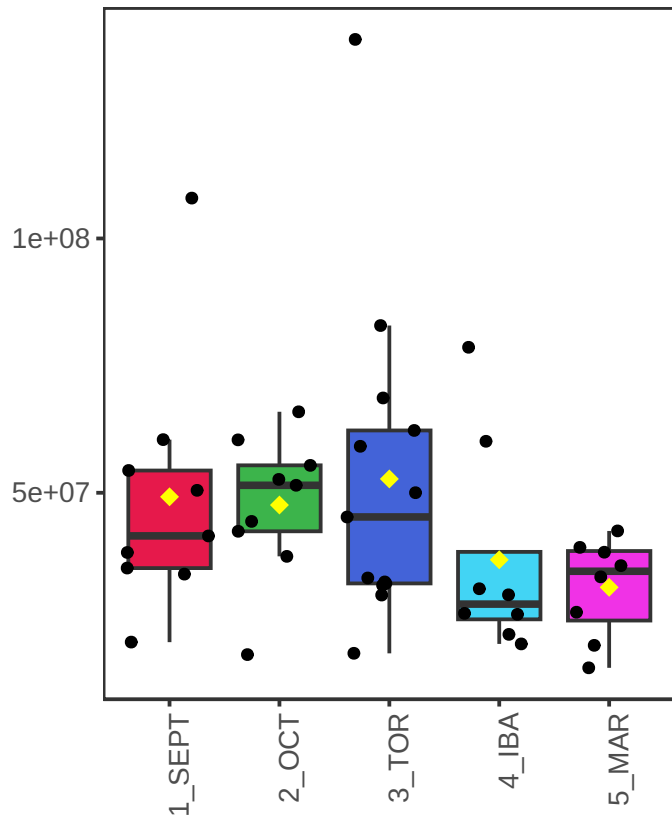

Normalized Conc.

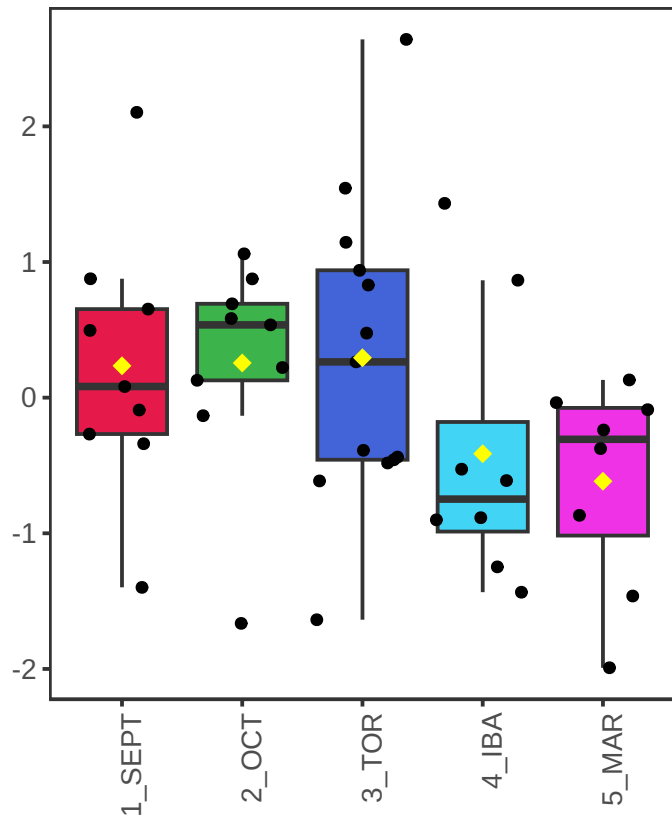

# Octanedioic acid

Original Conc.

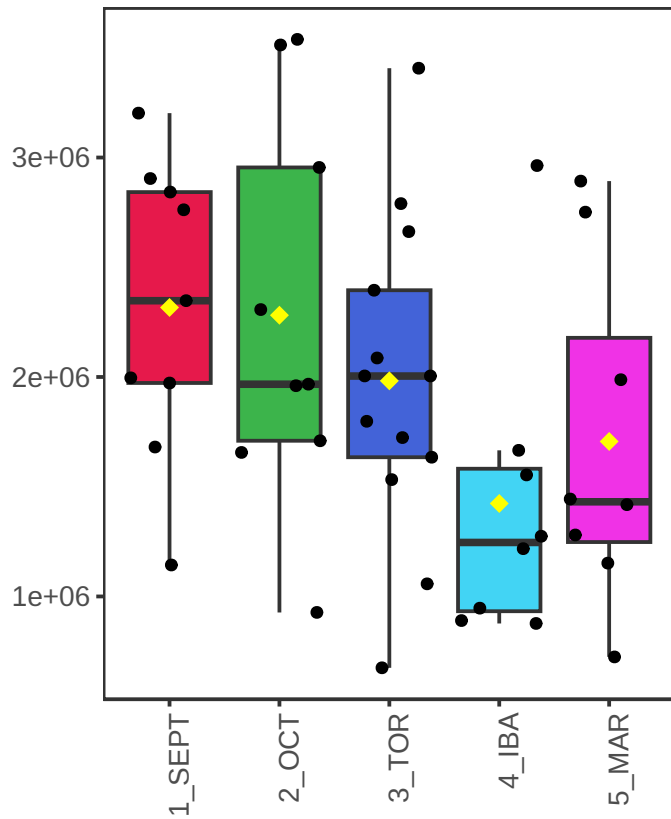

Normalized Conc.

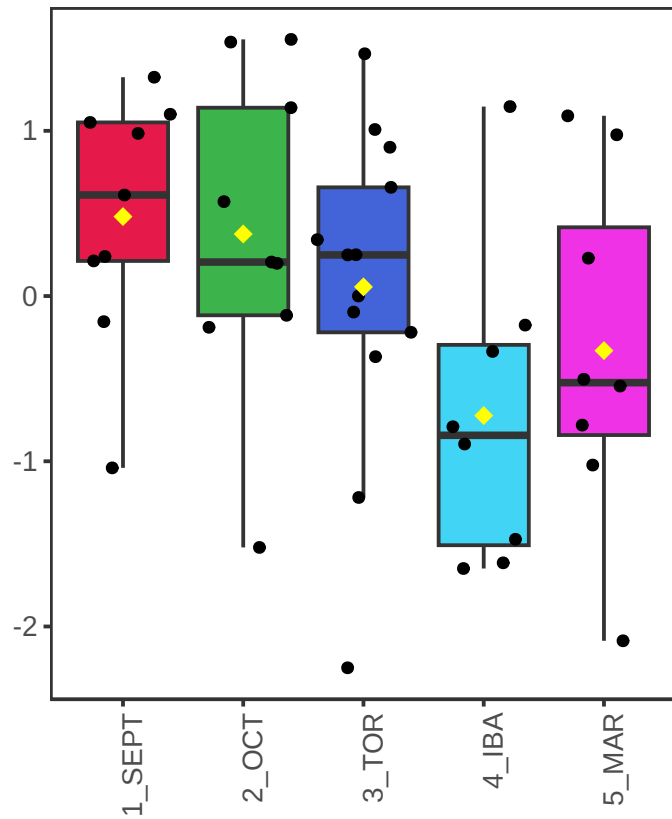

# O-ureido-(DL)-serine

Original Conc.

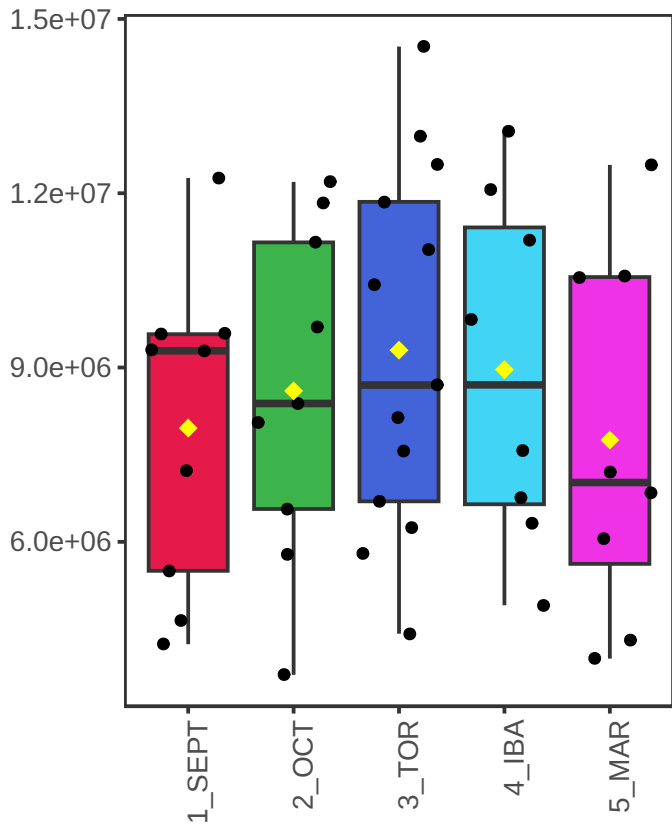

Normalized Conc.

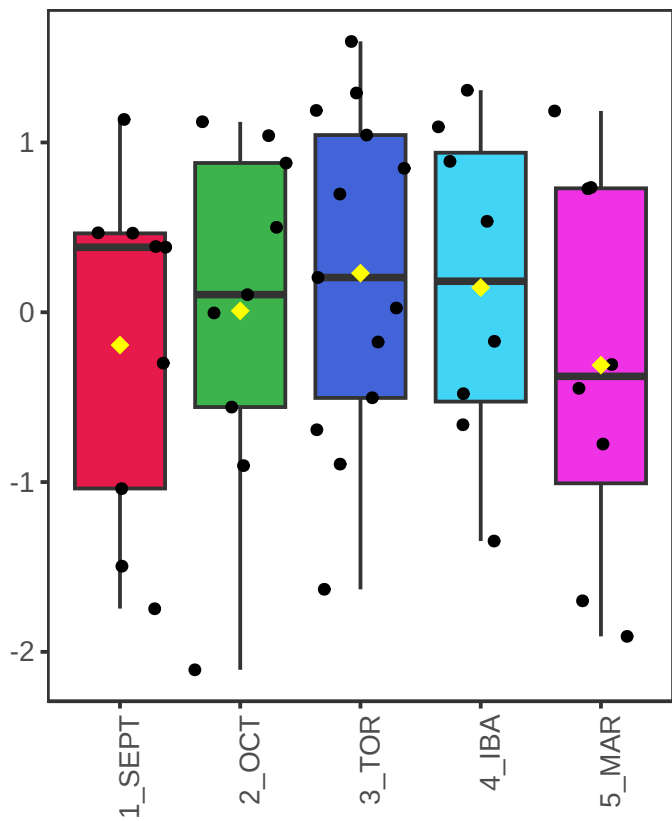

# Panthenol

Original Conc.

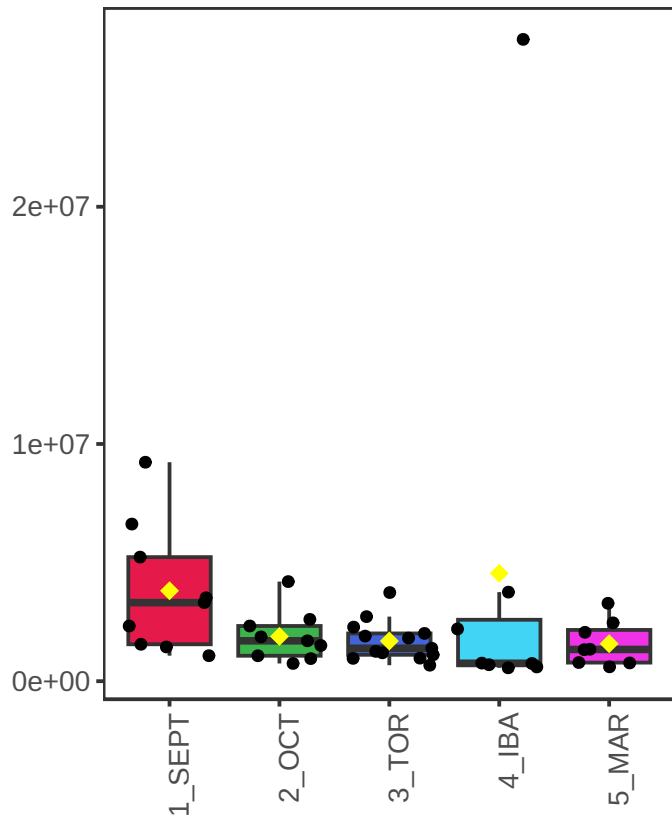

Normalized Conc.

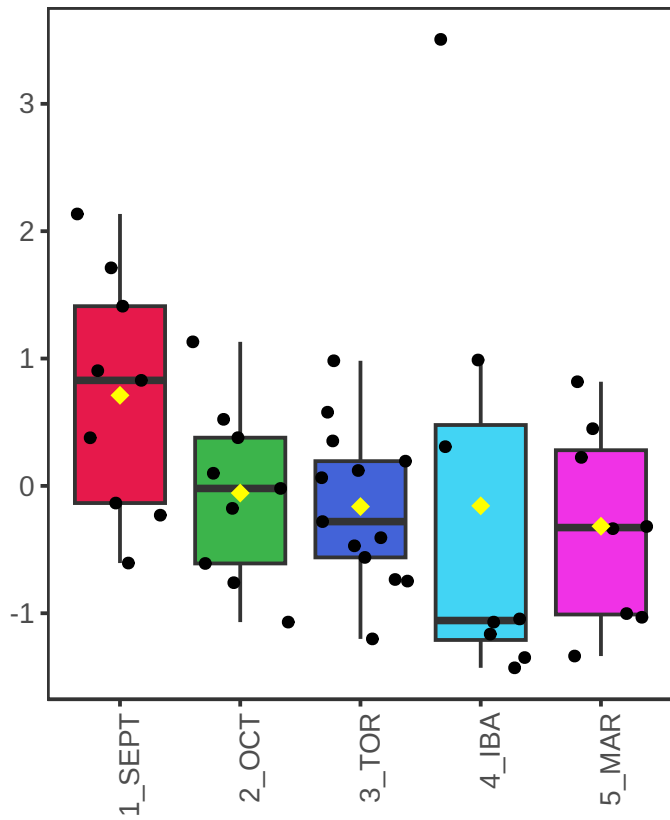

# Pantothenic acid

Original Conc.

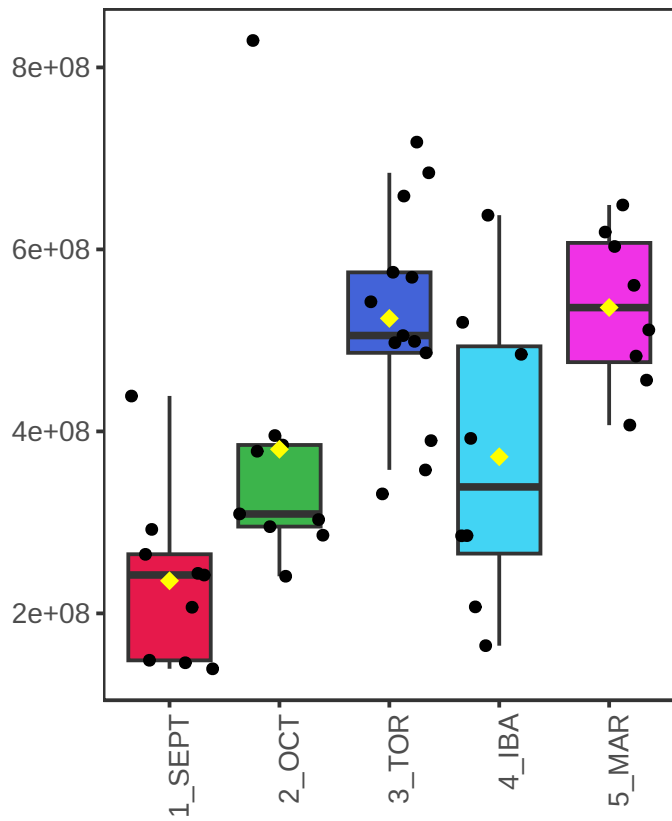

Normalized Conc.

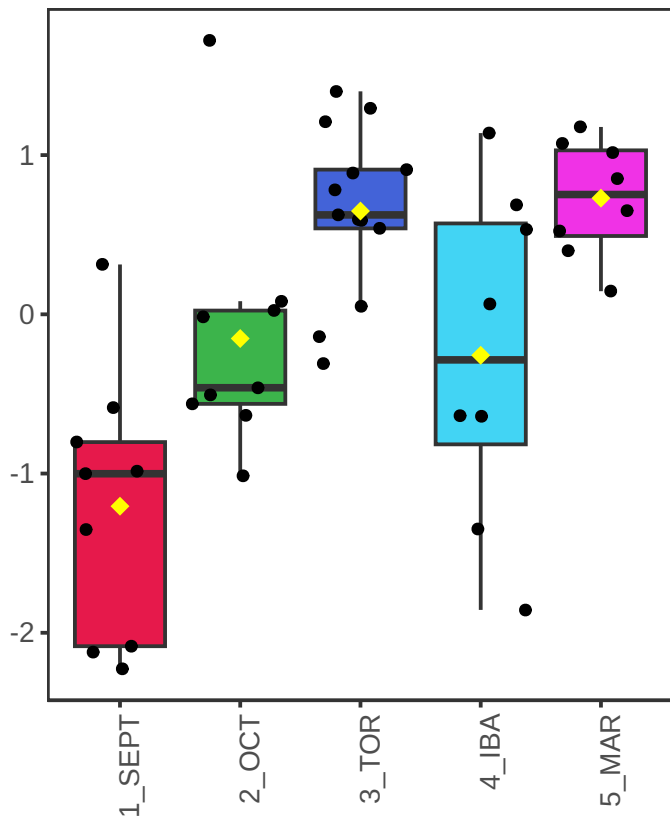

# Pentahomomethionine

Original Conc.

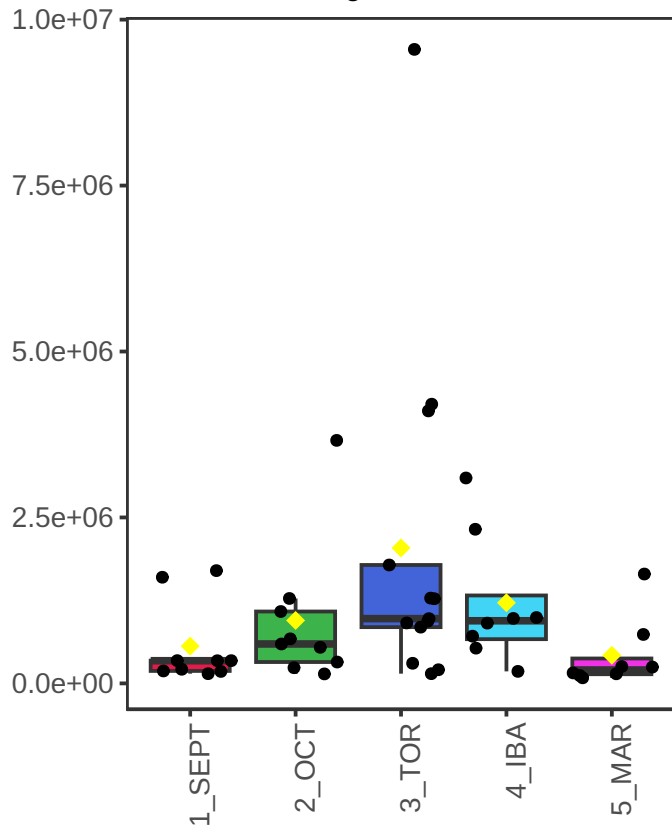

Normalized Conc.

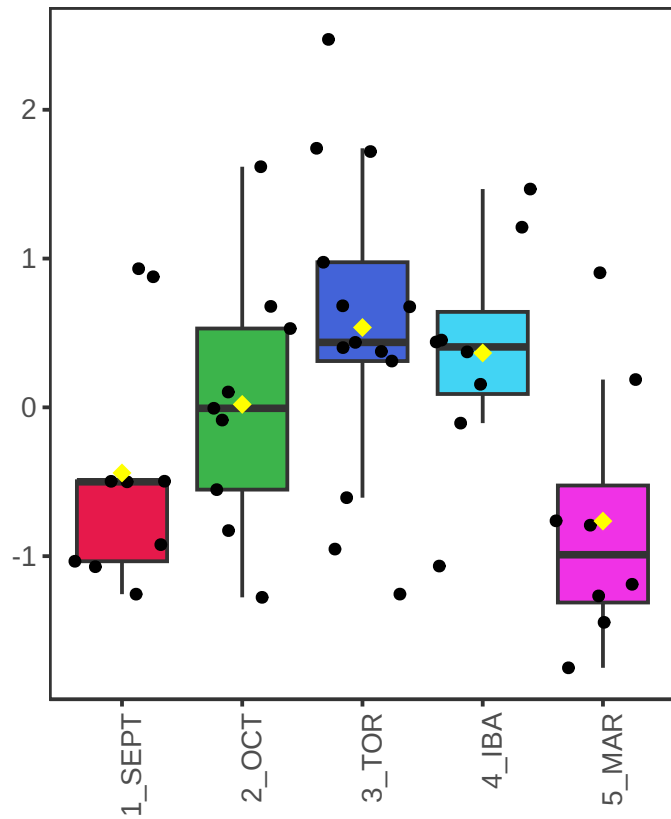

# Phenylalanine

Original Conc.

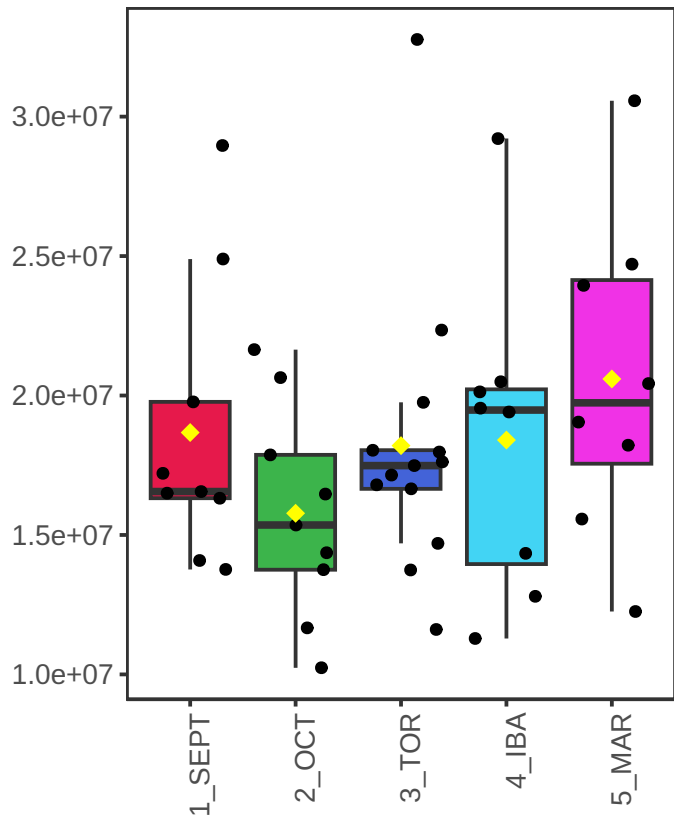

Normalized Conc.

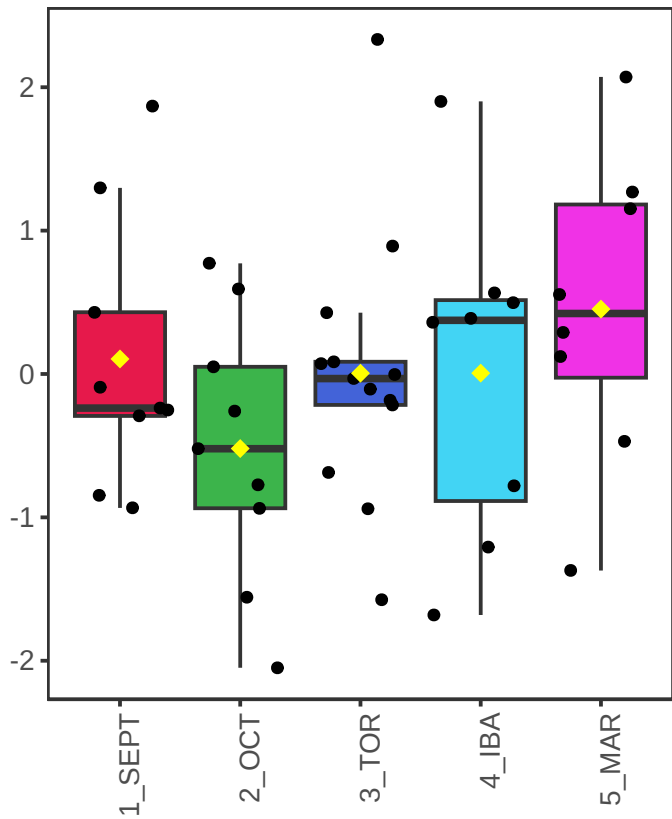



# Phosphoethanolamine

Original Conc.

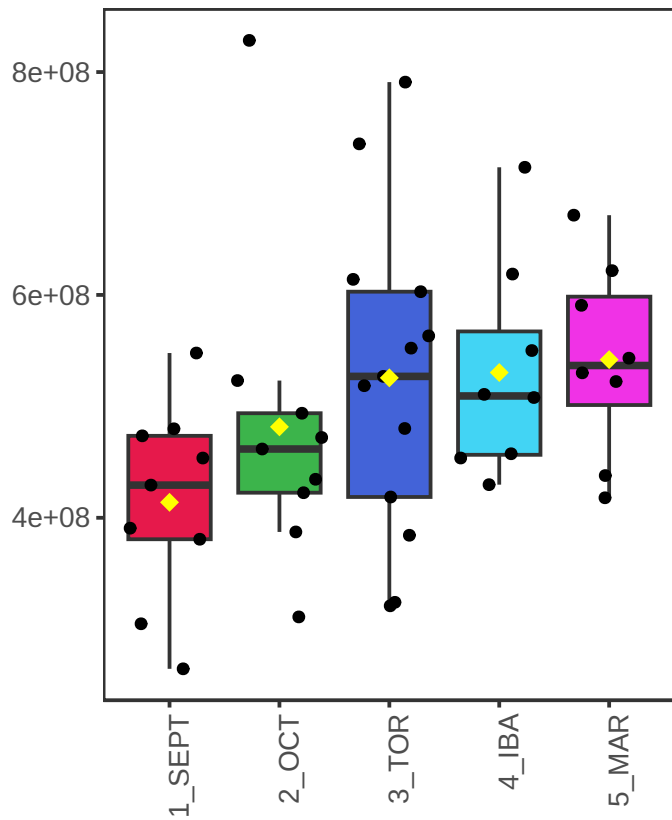

Normalized Conc.

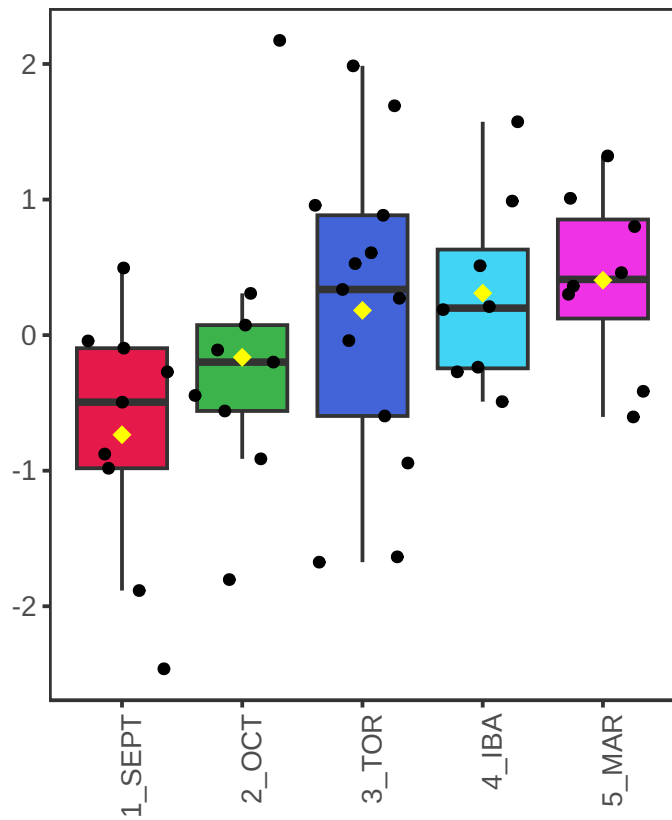

# Picolinic acid N-oxide

## Original Conc.

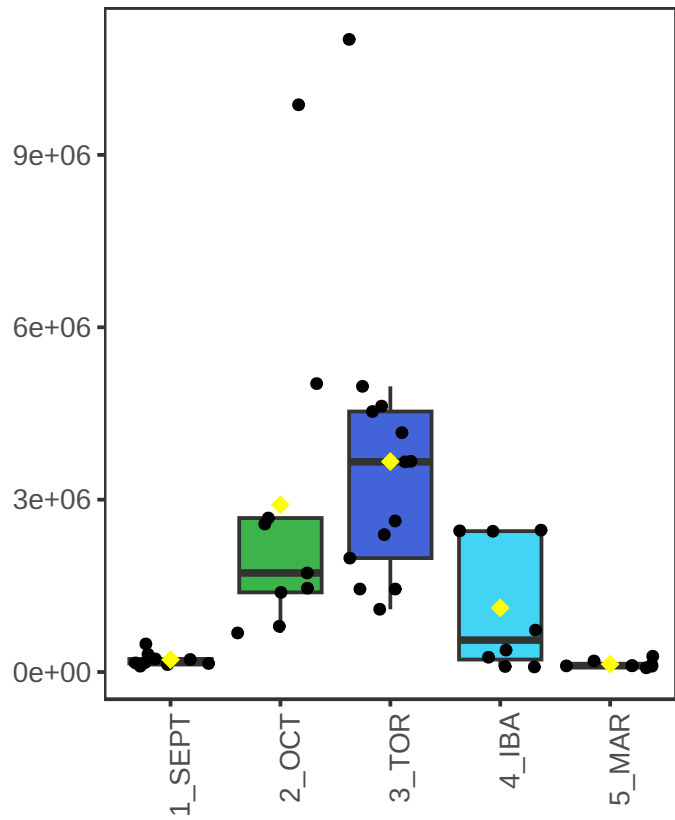

## Normalized Conc.

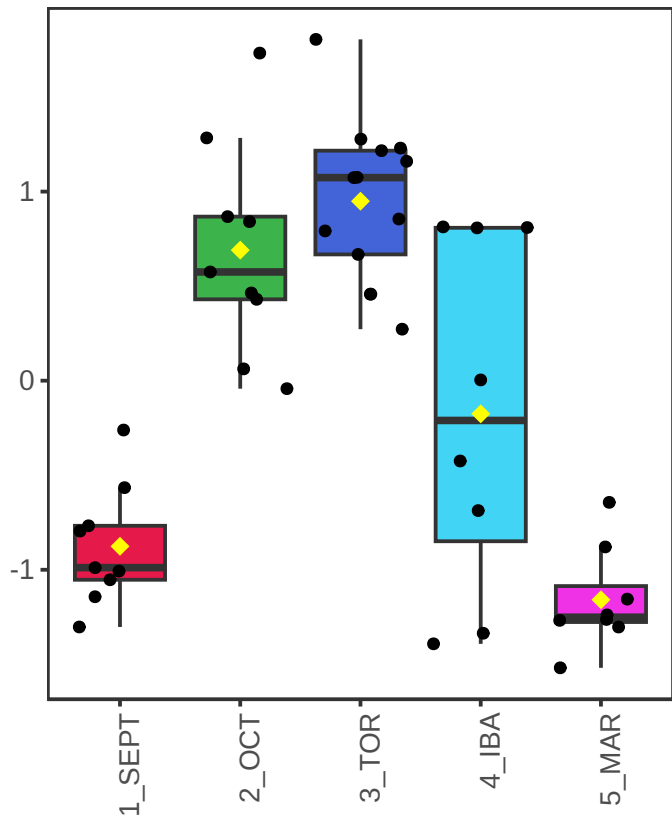

# Pipecolinic acid

Original Conc.

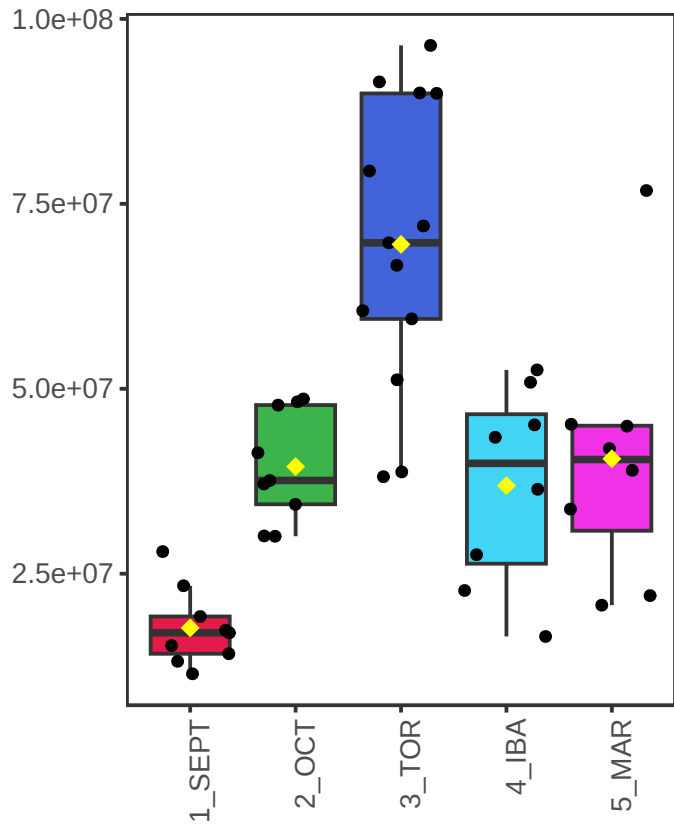

Normalized Conc.

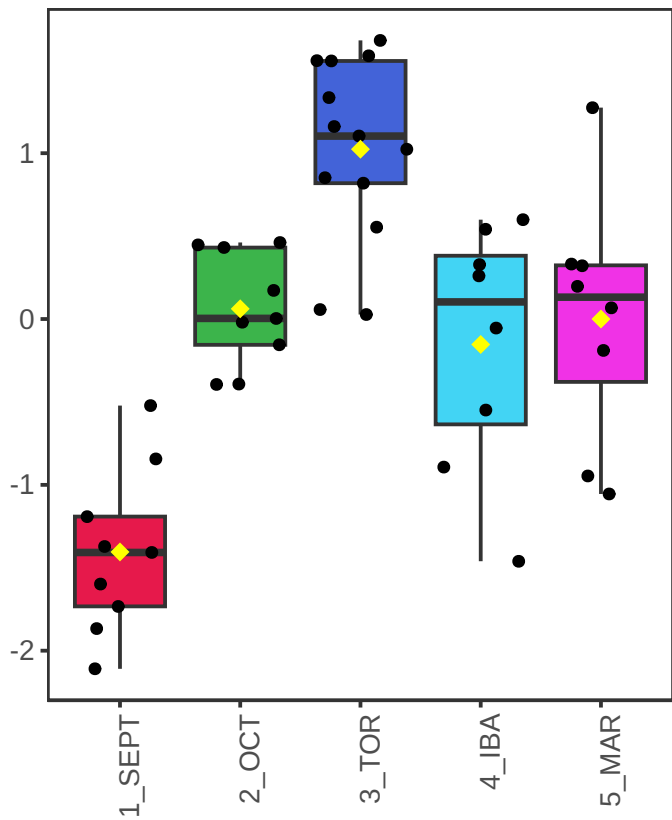

# Platelet-activating factor

Original Conc.

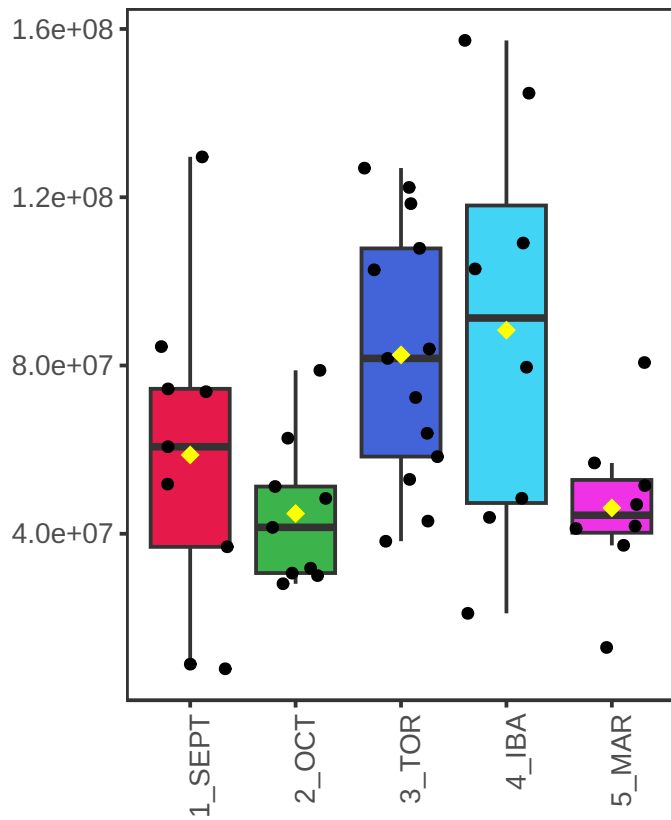

Normalized Conc.

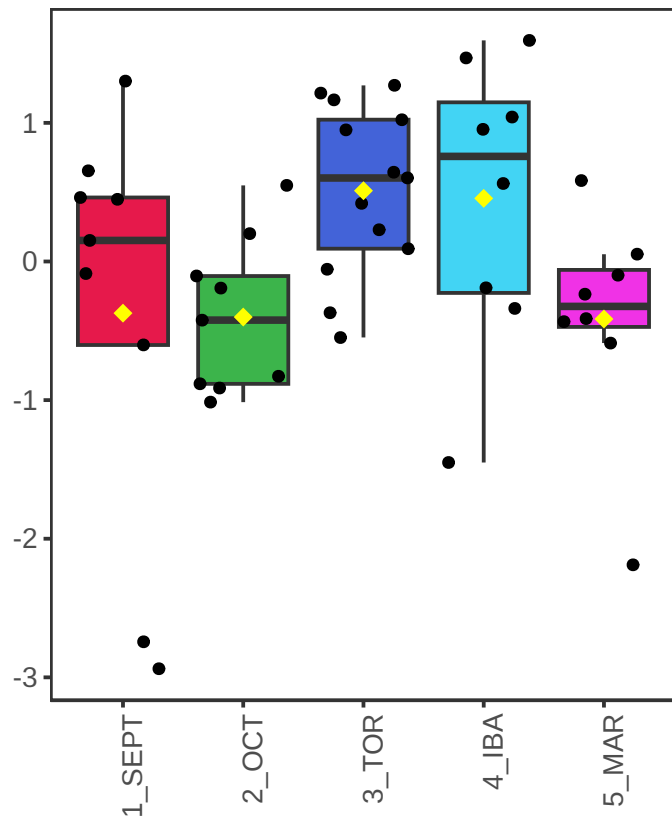

# Pro-Leu-Lys

Original Conc.

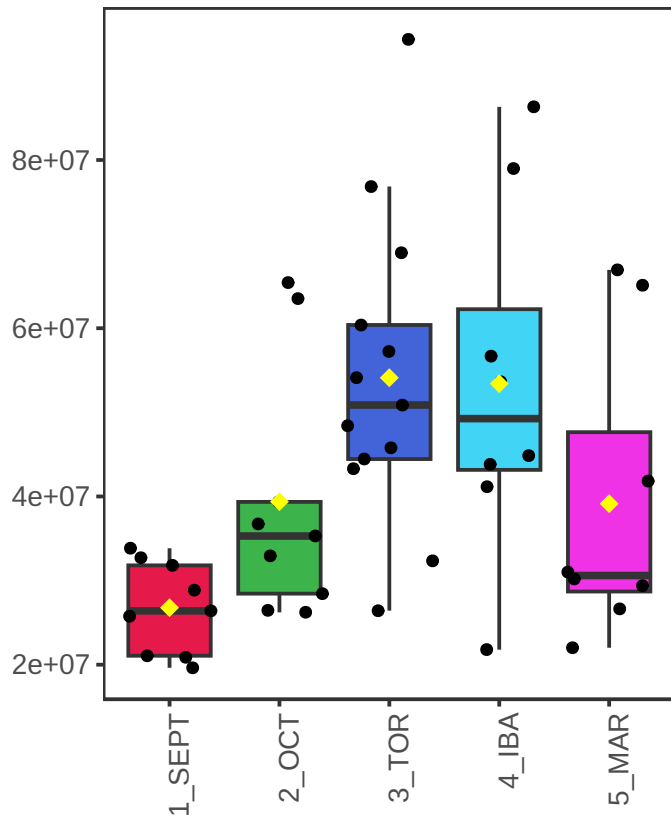

Normalized Conc.

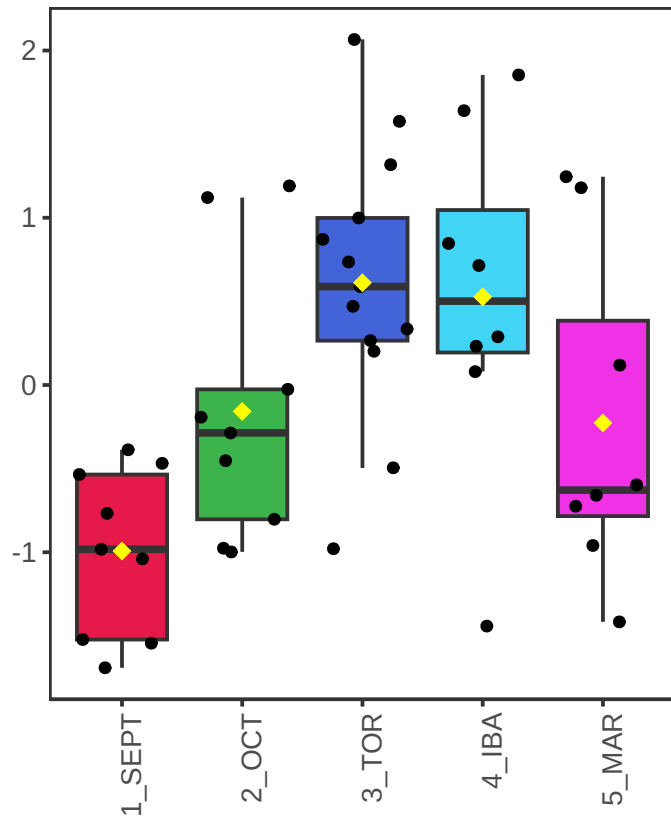

# Prolinamide

Original Conc.

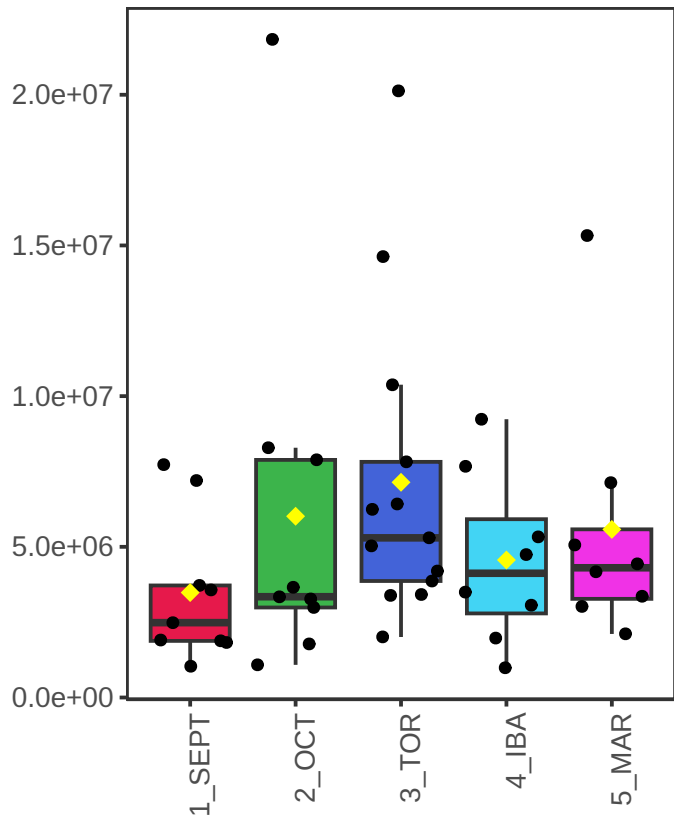

Normalized Conc.

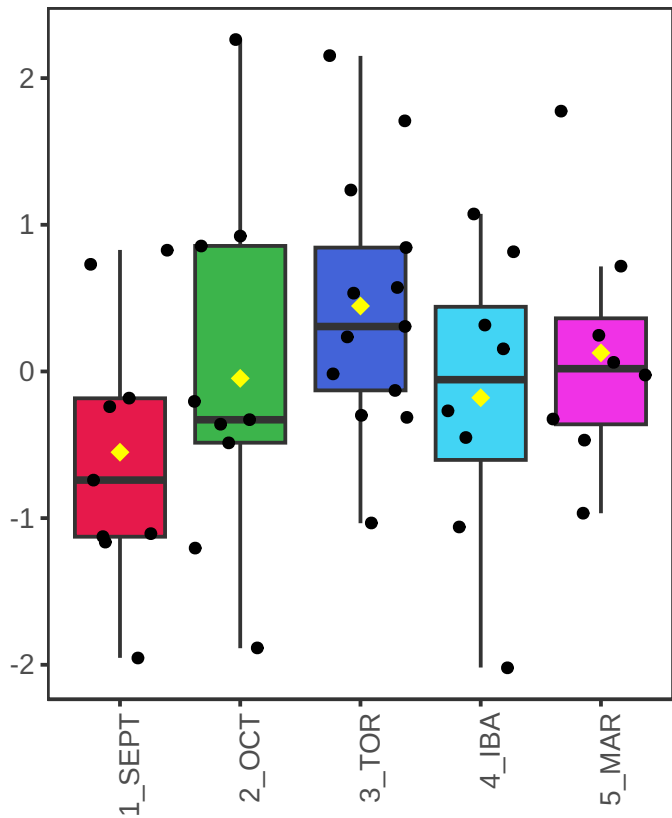

# Proline

## Original Conc.

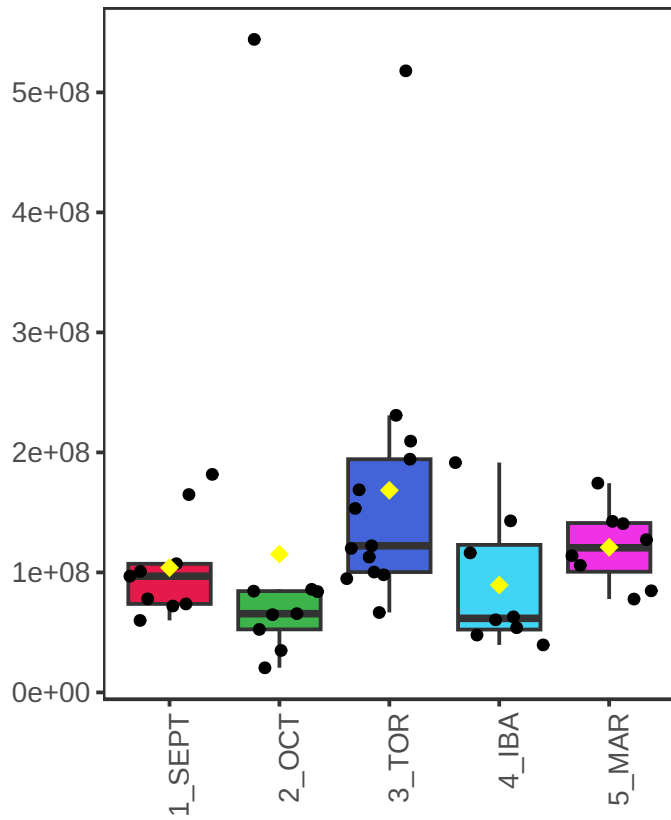

## Normalized Conc.

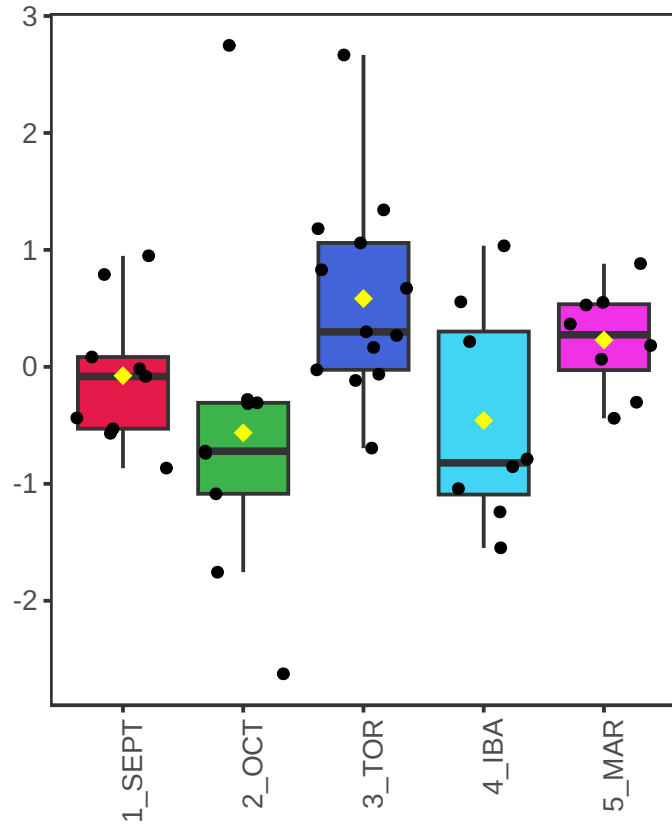

# Prolylleucine

Original Conc.

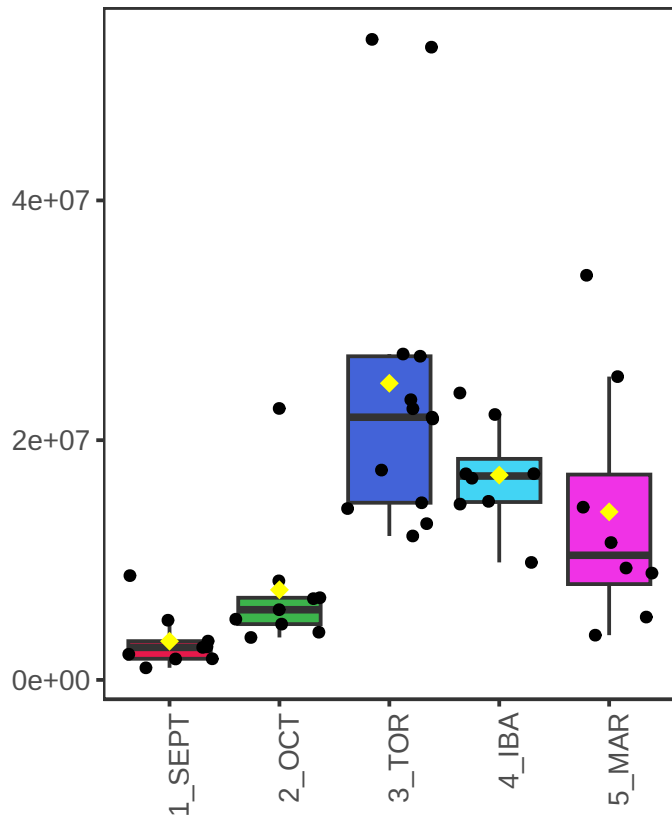

Normalized Conc.

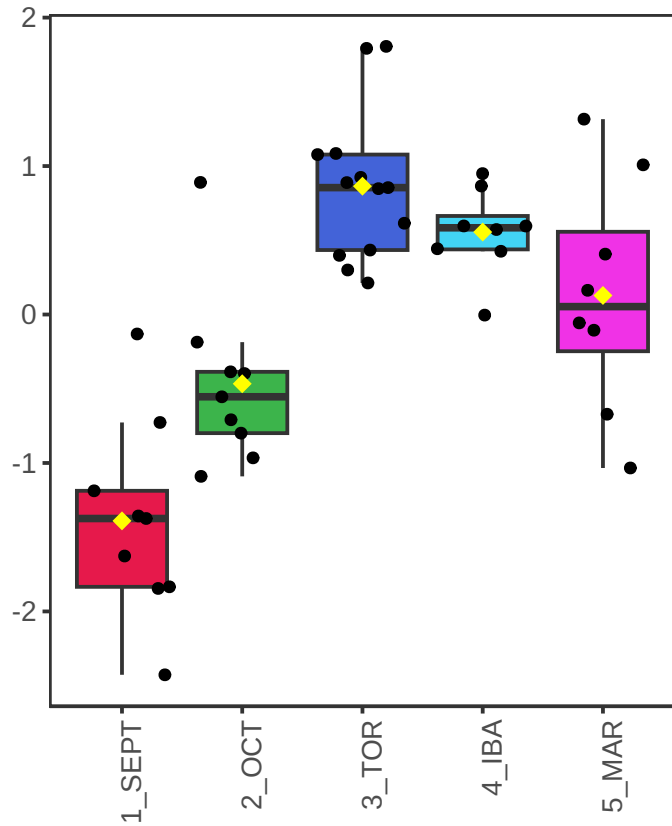



# Propionylcarnitine

Original Conc.

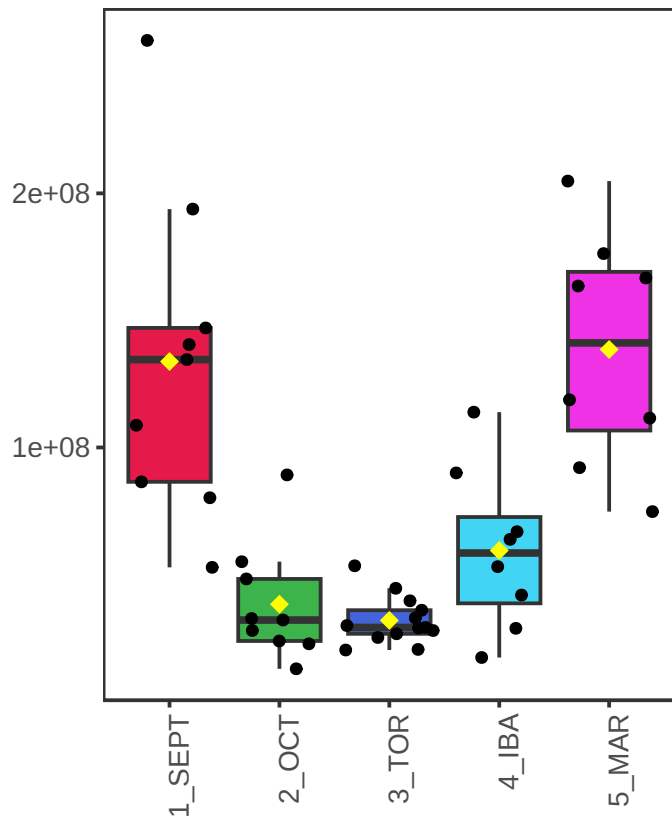

Normalized Conc.

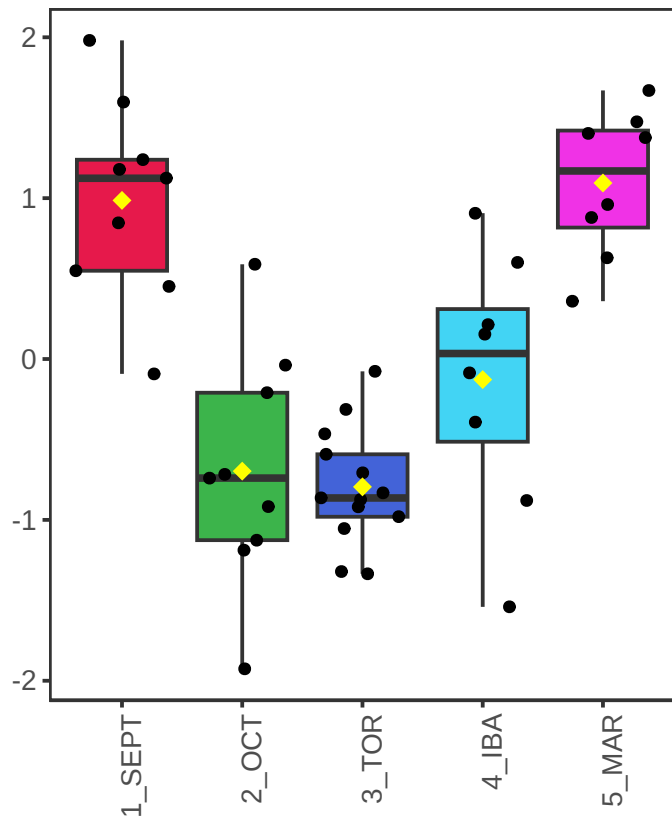

# Pyrogallol

Original Conc.

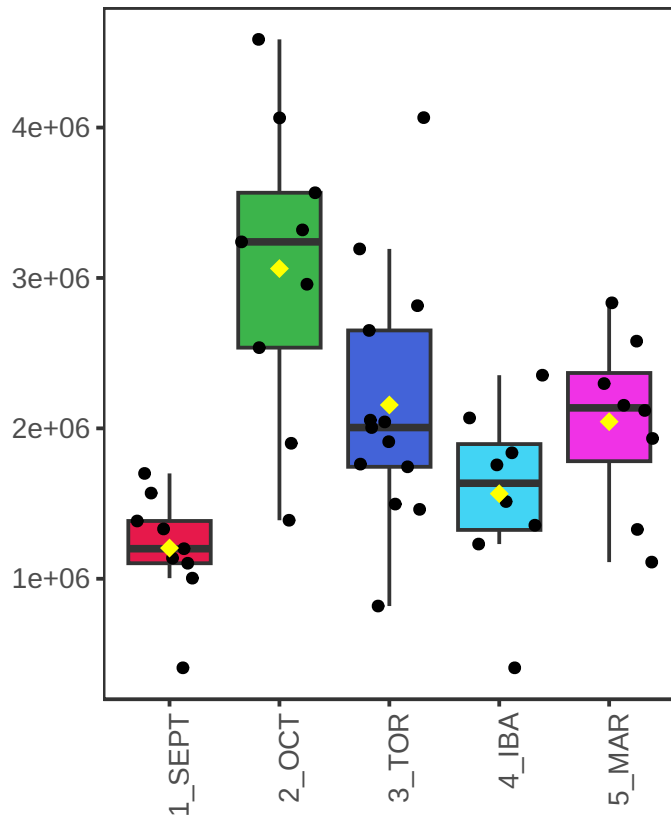

Normalized Conc.

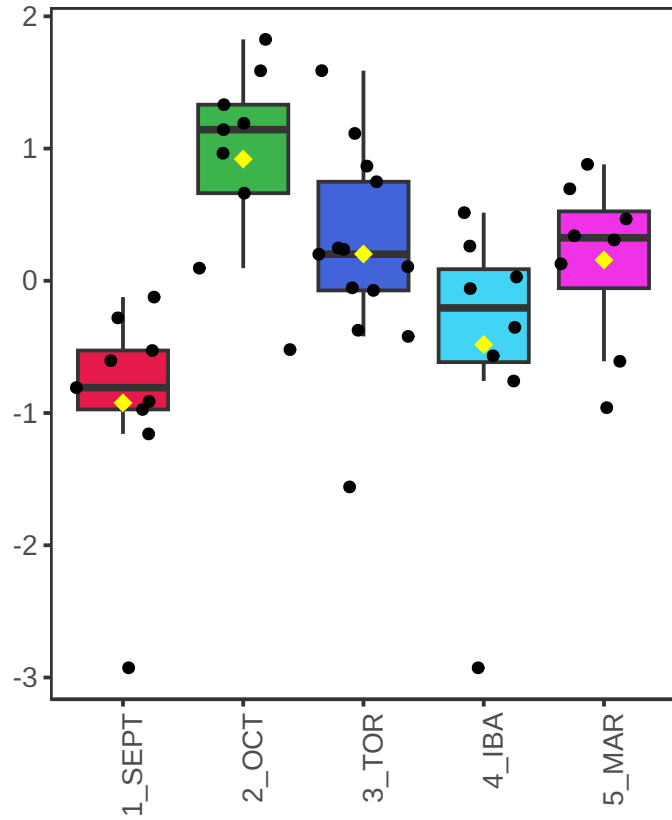

# Pyroglutamic acid

Original Conc.

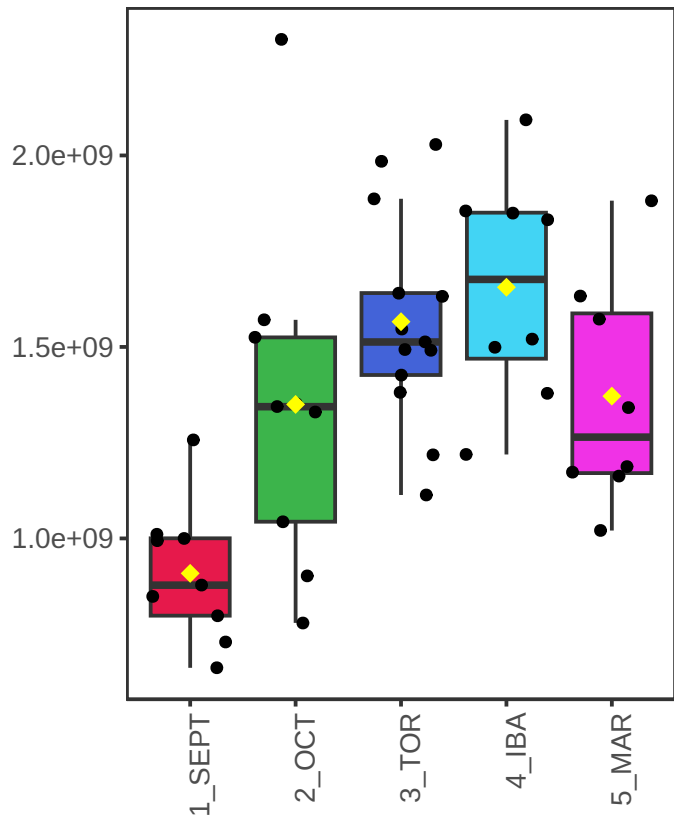

Normalized Conc.

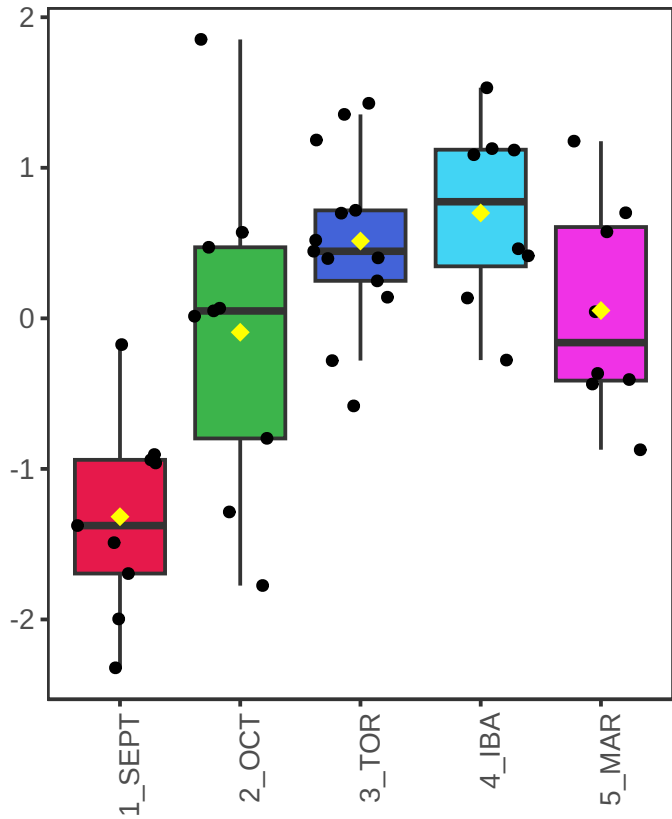

# Pyrrolidine

Original Conc.

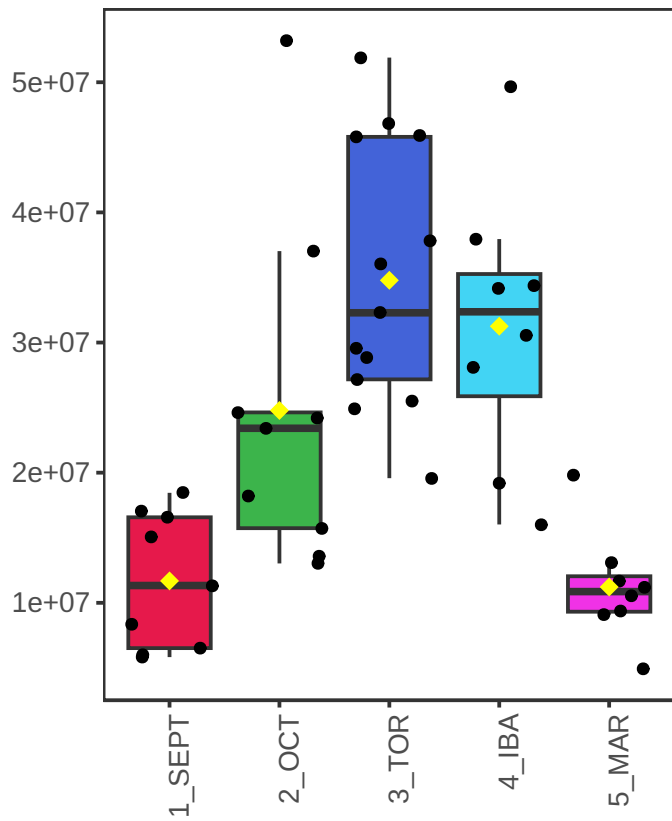

Normalized Conc.

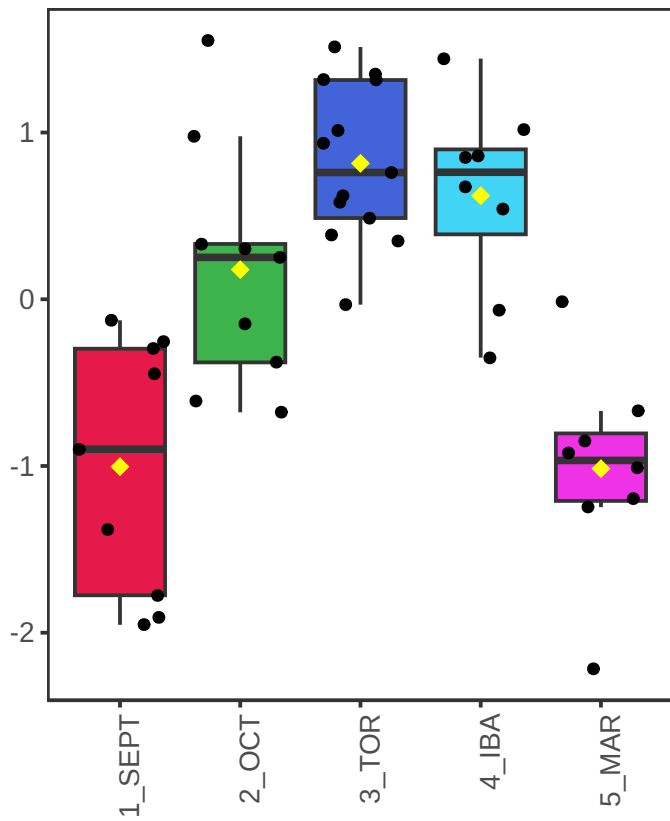

# S-Adenosylhomocysteine

Original Conc.

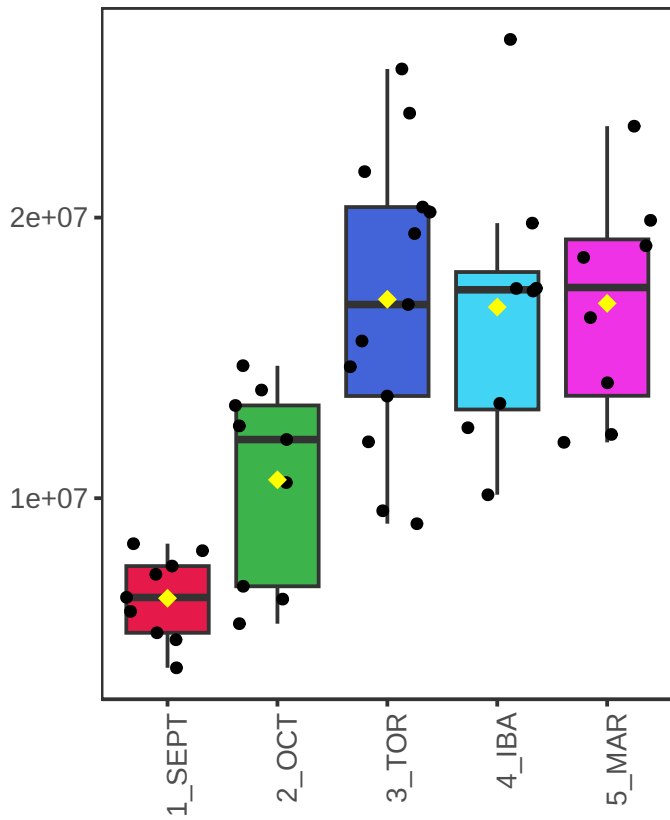

Normalized Conc.

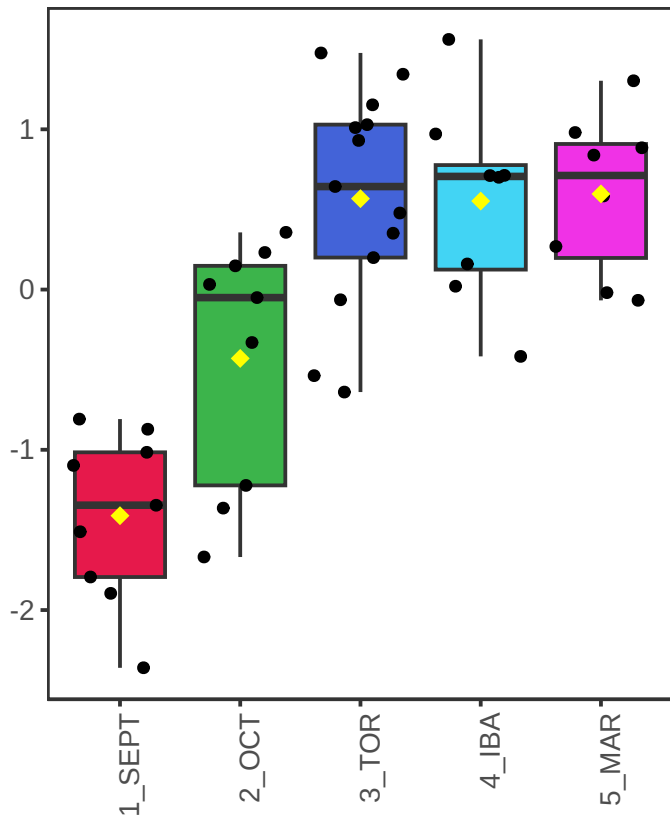

# Serine

## Original Conc.

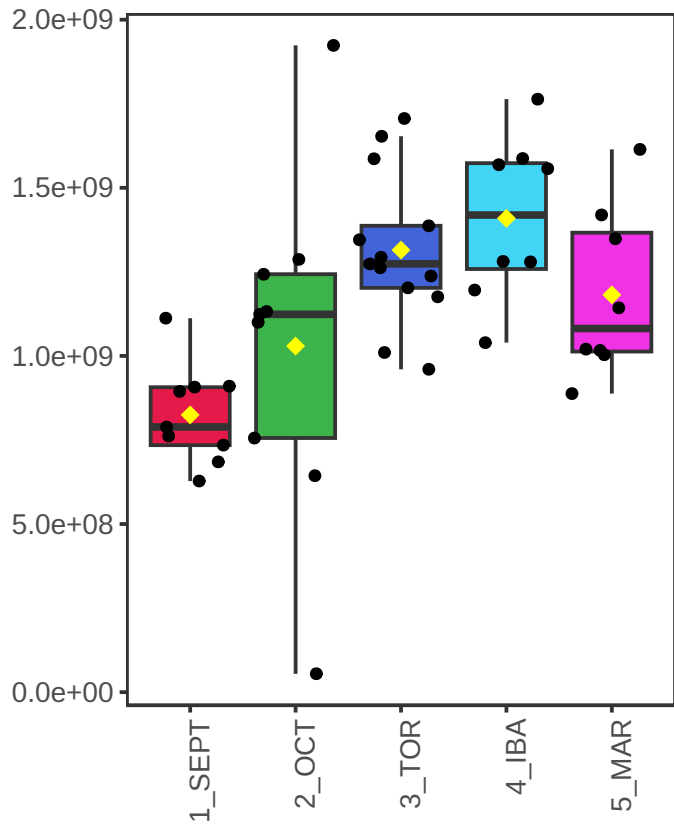

## Normalized Conc.

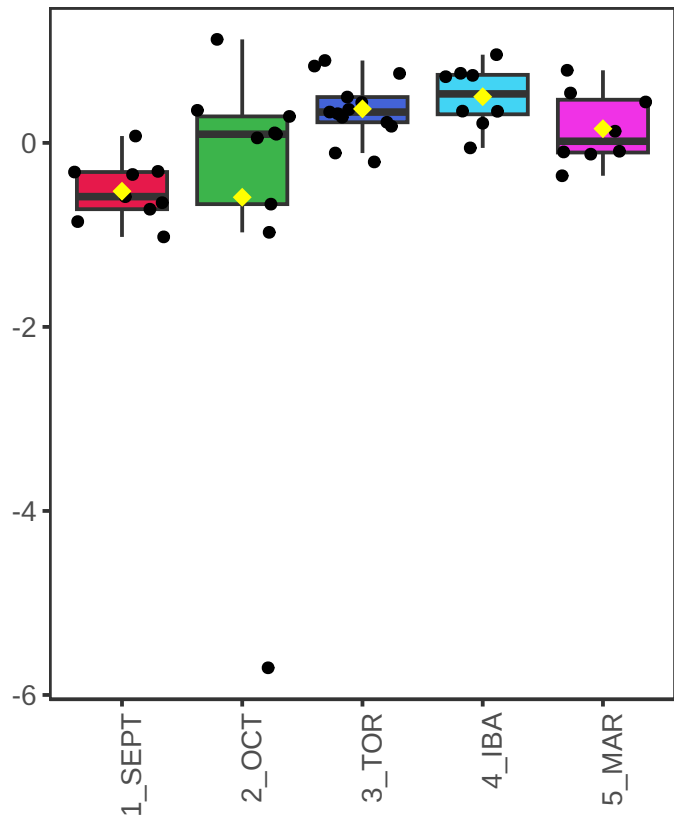

# Stachydrine

Original Conc.

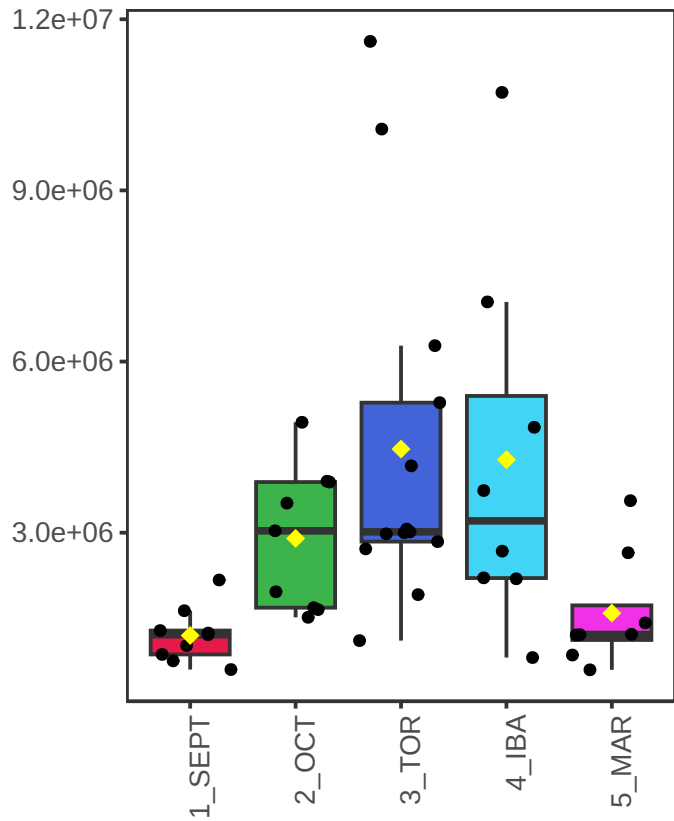

Normalized Conc.

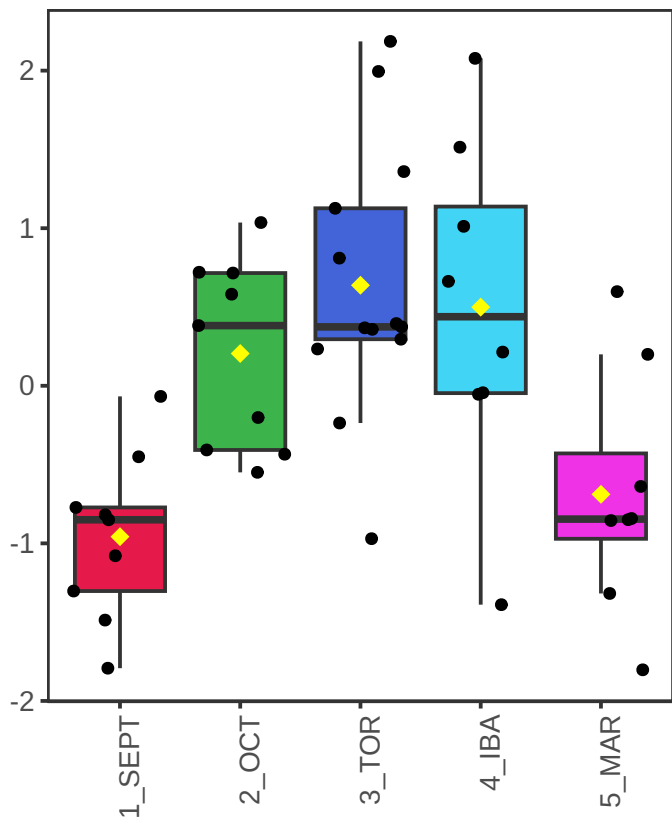

# Taurocholic acid

Original Conc.

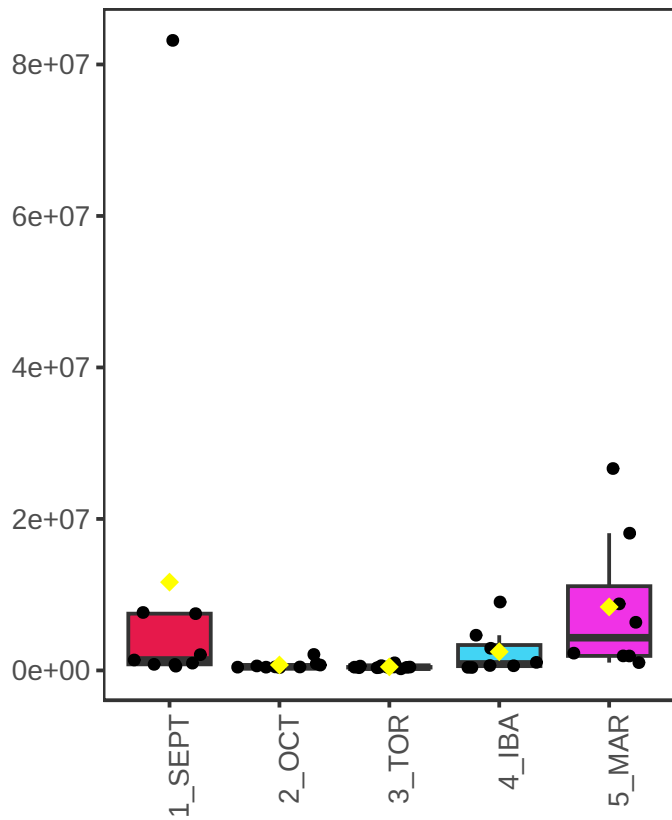

Normalized Conc.

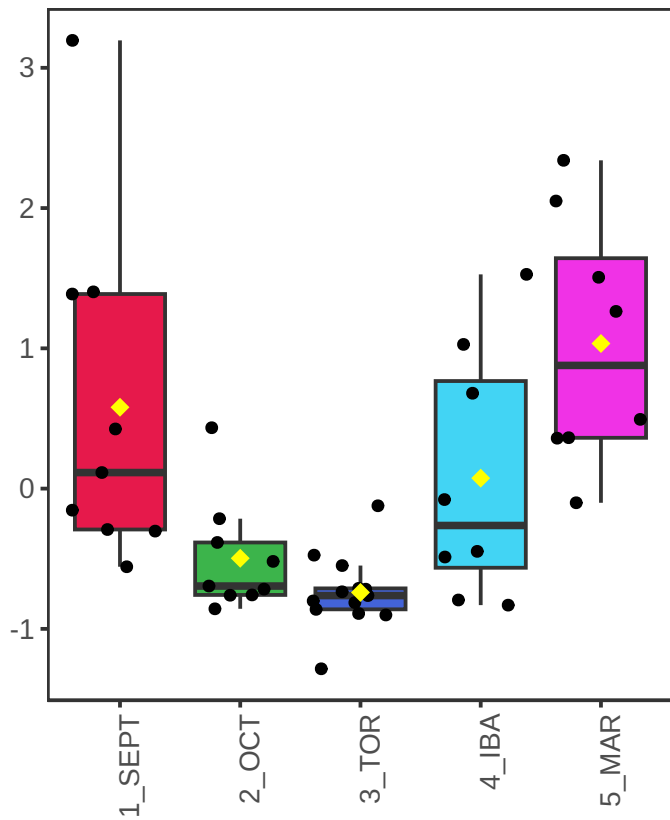



# Thiamine

Original Conc.

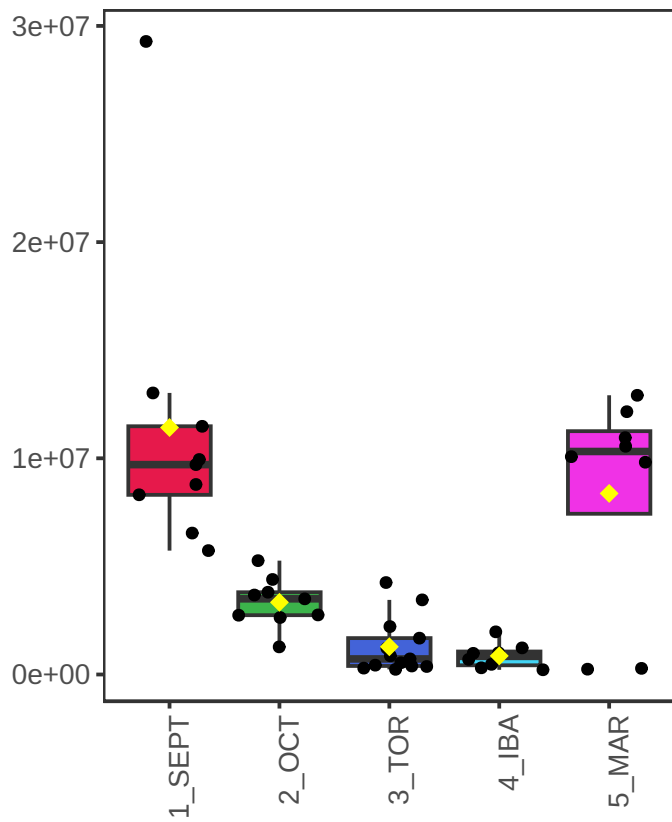

Normalized Conc.

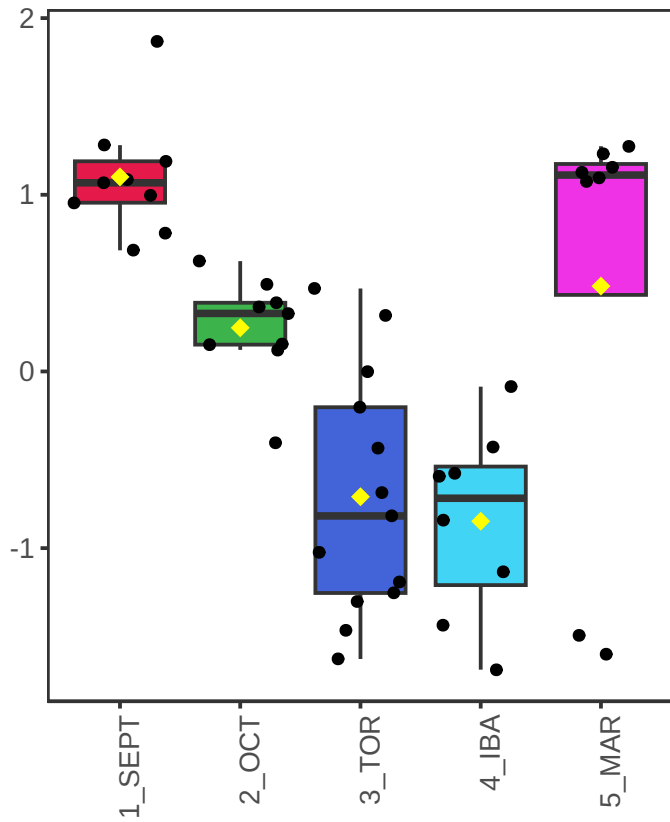

# Threonine

Original Conc.

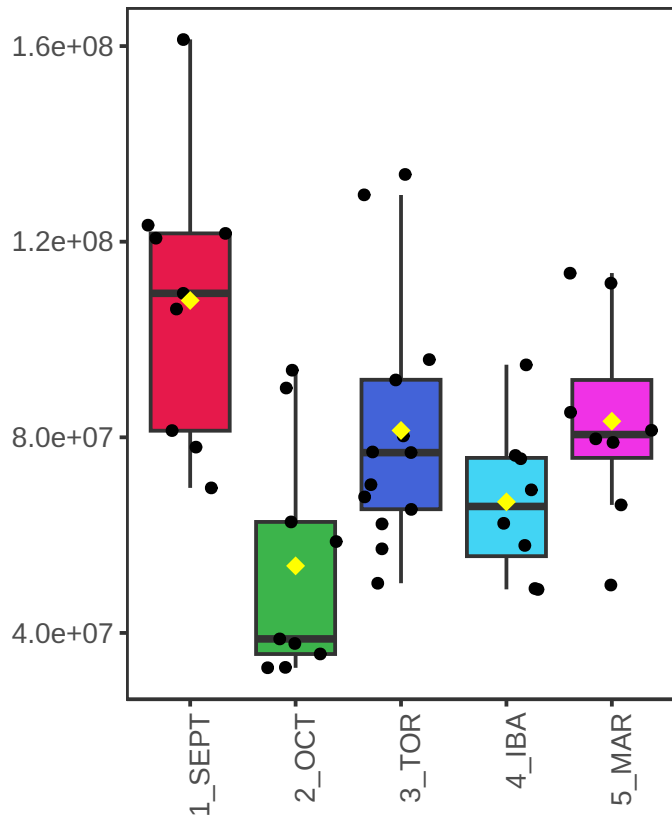

Normalized Conc.

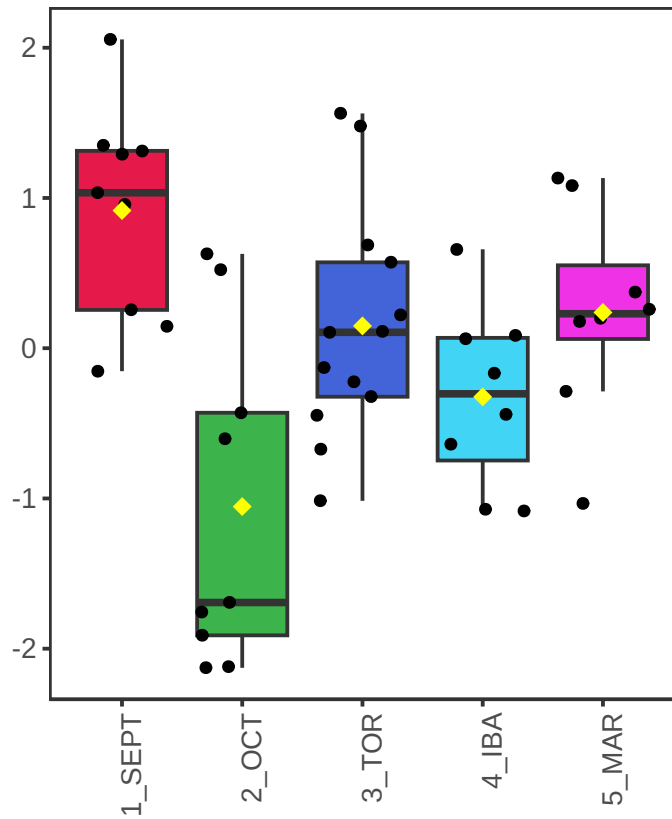

# THTA

## Original Conc.

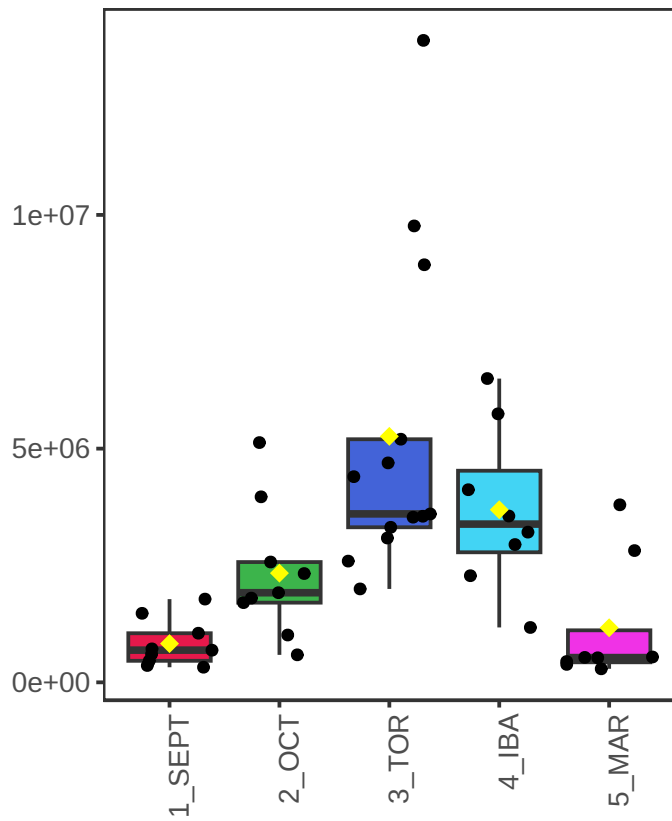

## Normalized Conc.

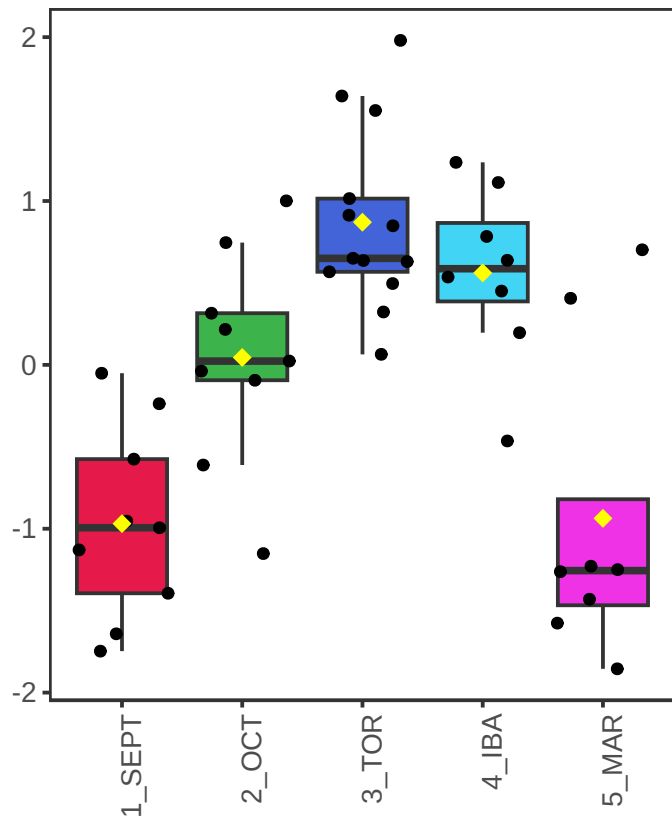

# Tilarginine

Original Conc.

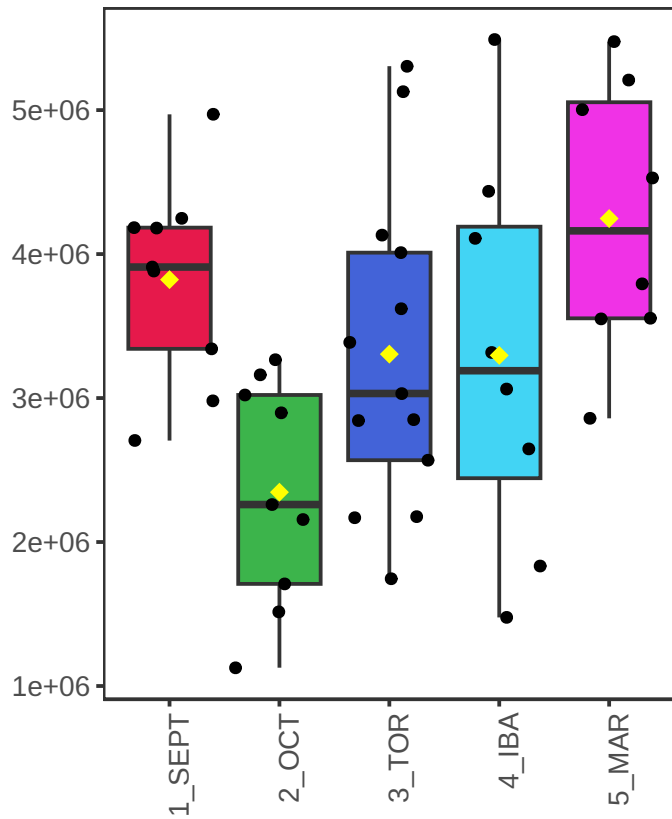

Normalized Conc.

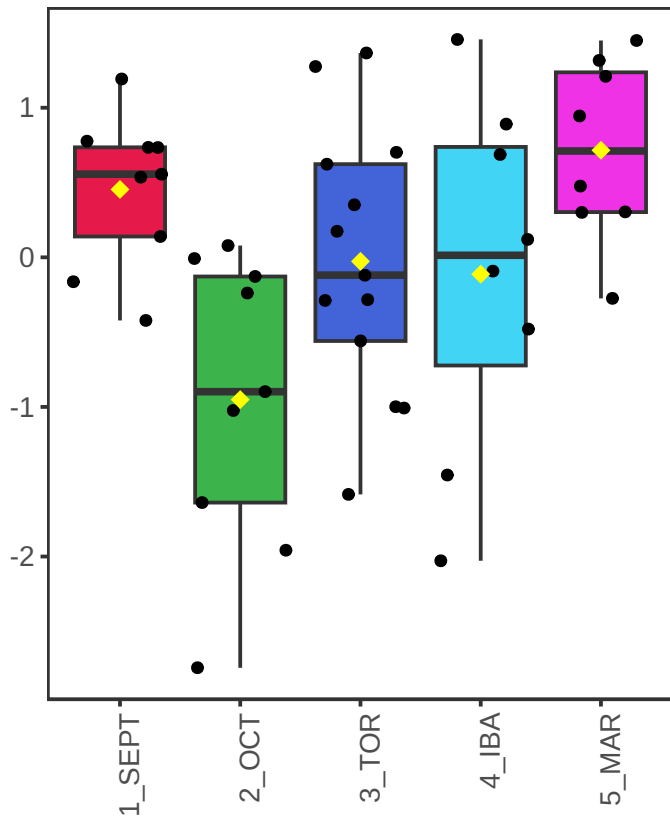

# Trans-3-Indoleacrylic acid

Original Conc.

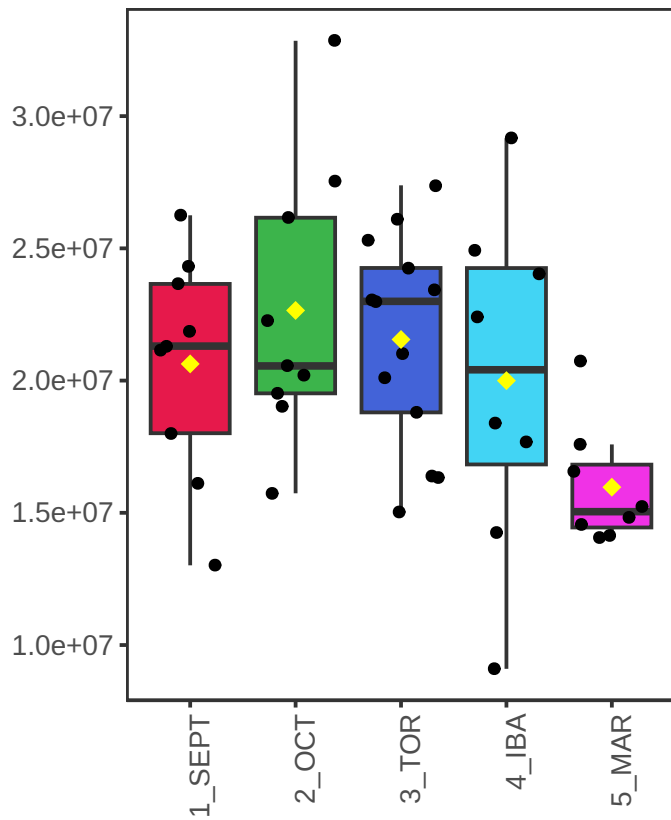

Normalized Conc.

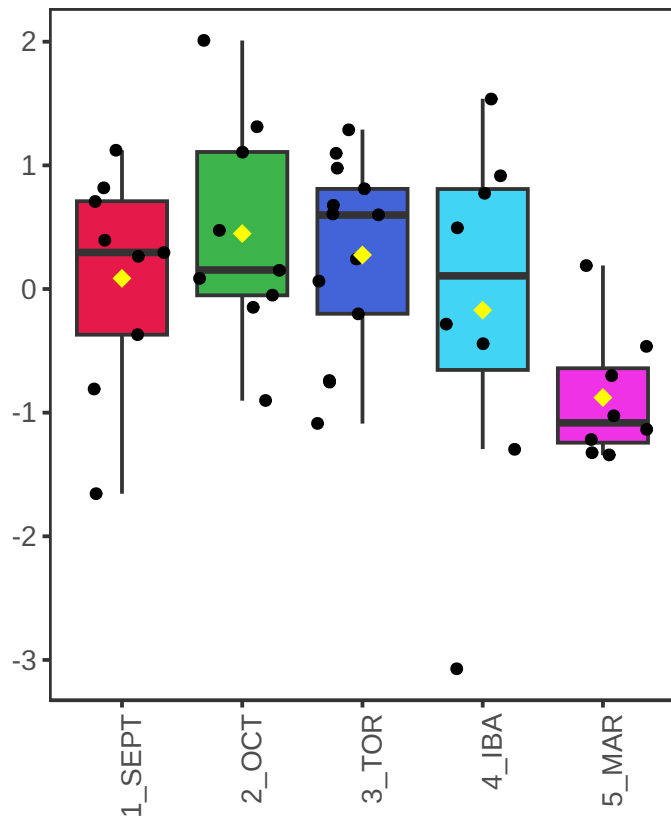

# Traumatin

Original Conc.

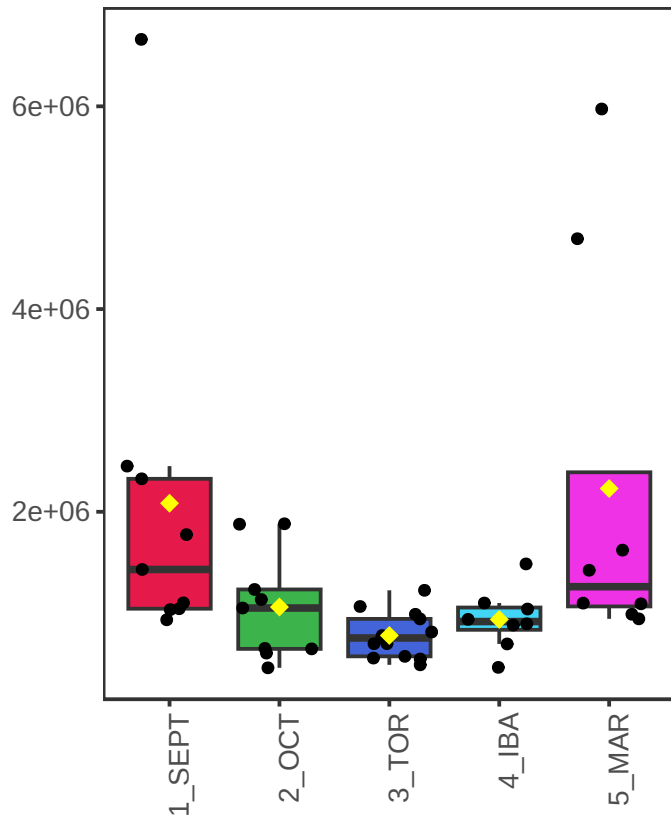

Normalized Conc.

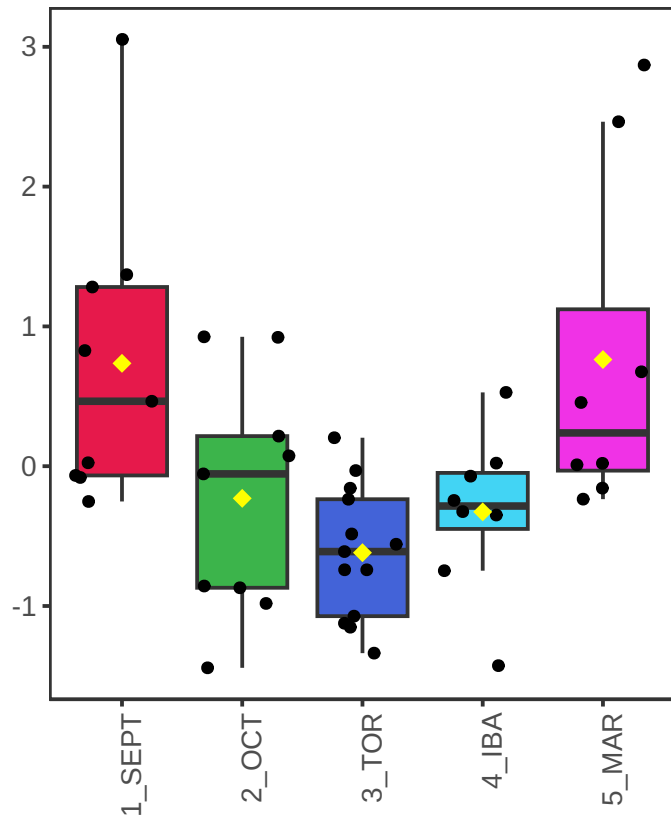

# Triethanolamine

Original Conc.

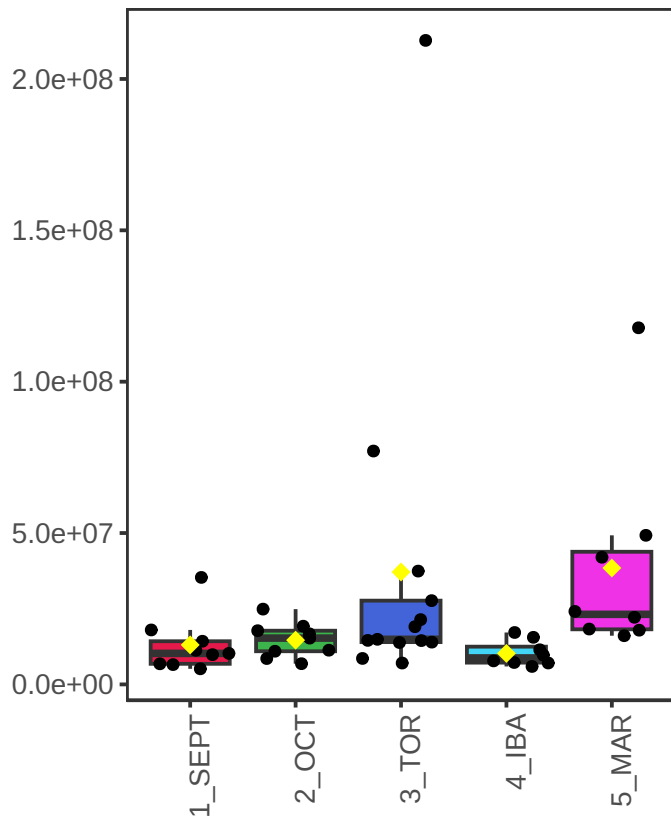

Normalized Conc.

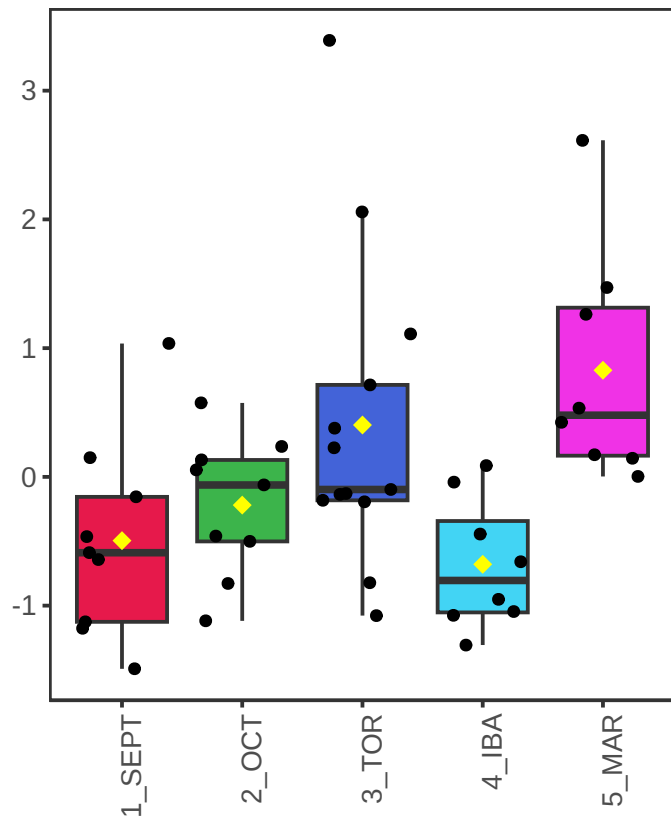

# Trimethylamine N-oxide

Original Conc.

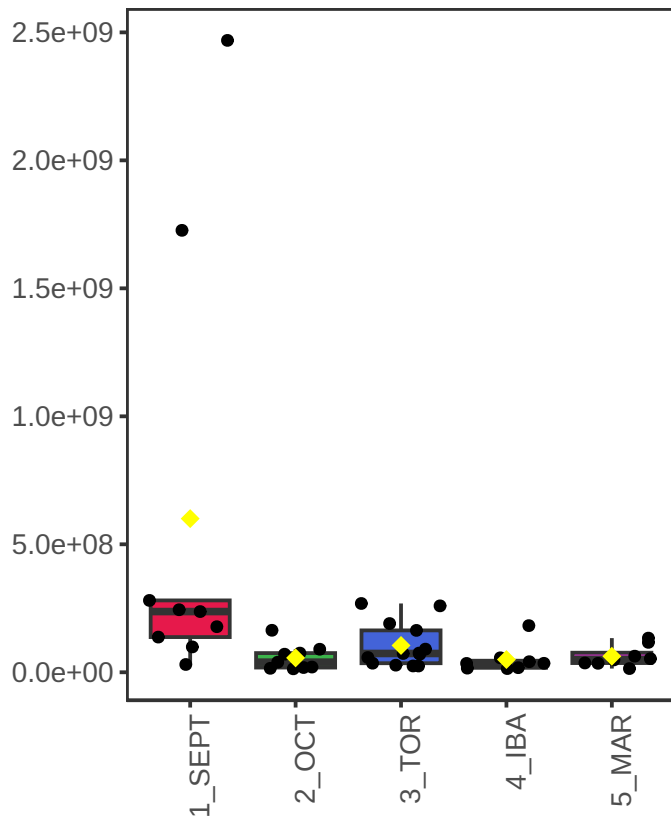

Normalized Conc.

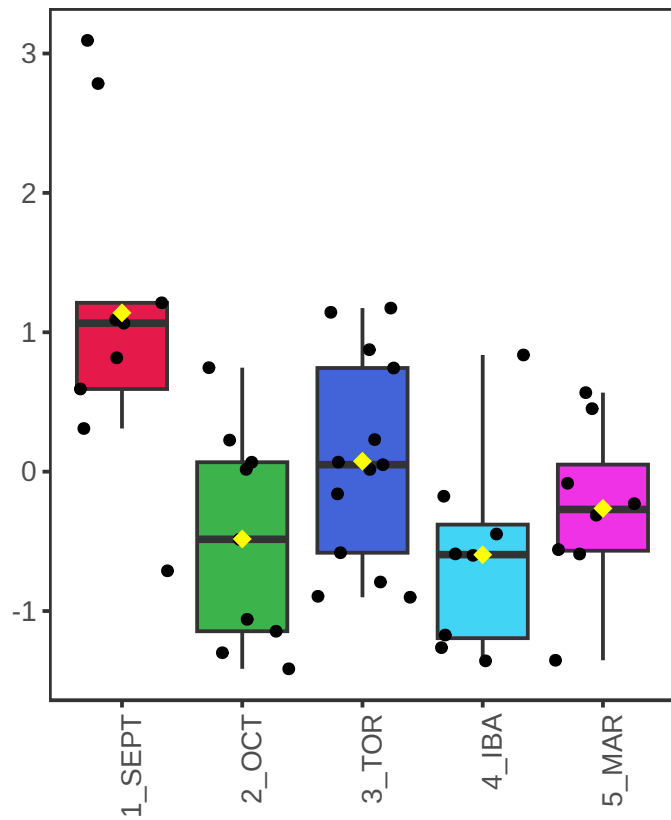



# Tris(2-butoxyethyl) phosphate

Original Conc.

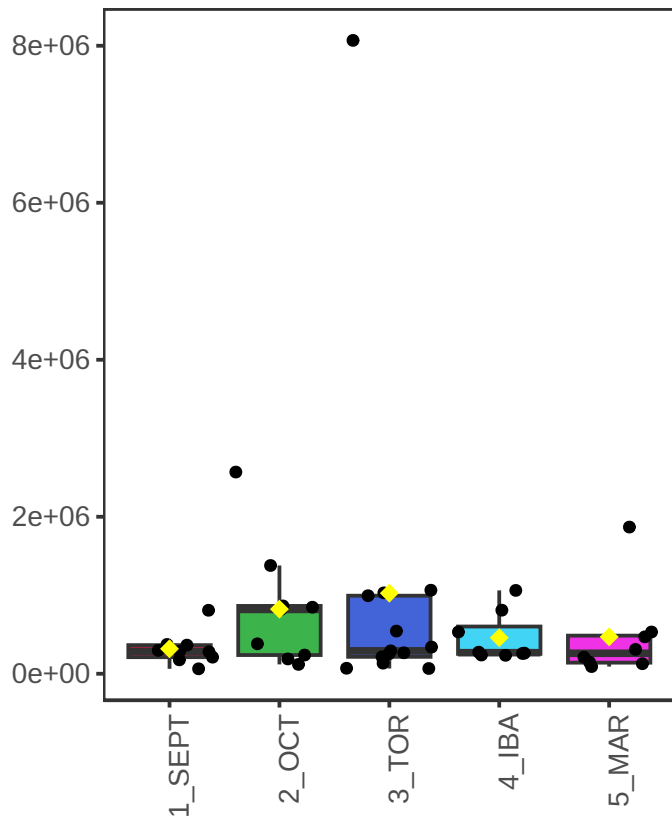

Normalized Conc.

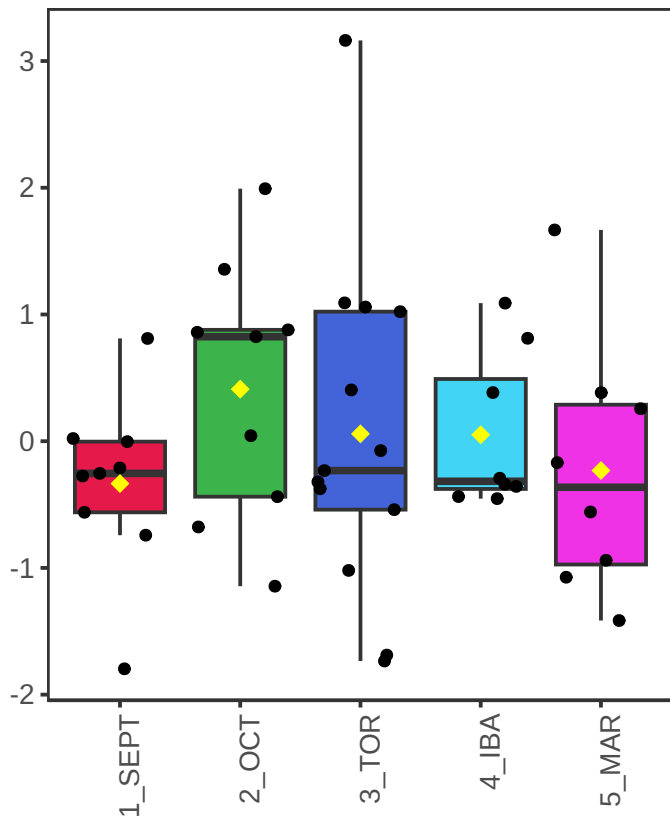

# Tris(hydroxymethyl)aminomethane

Original Conc.

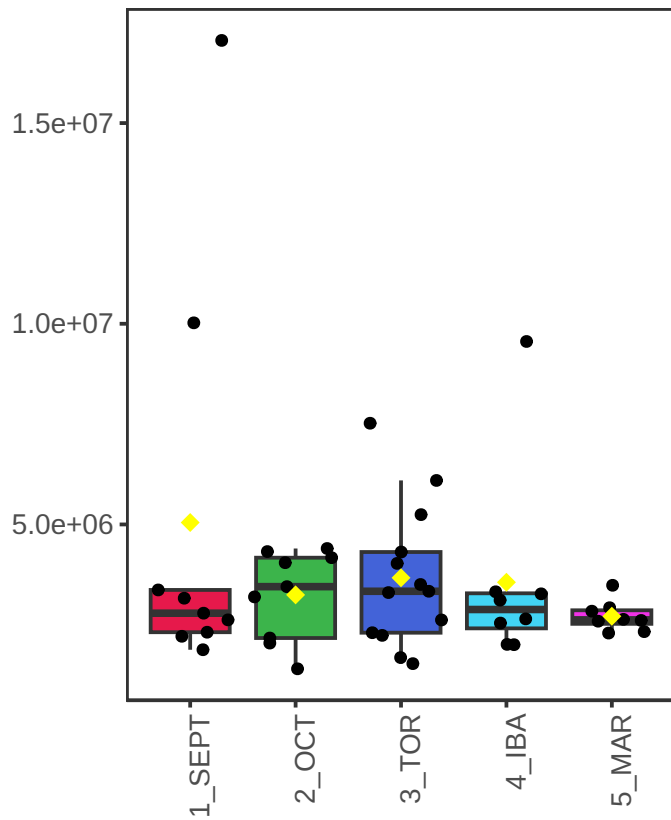

Normalized Conc.

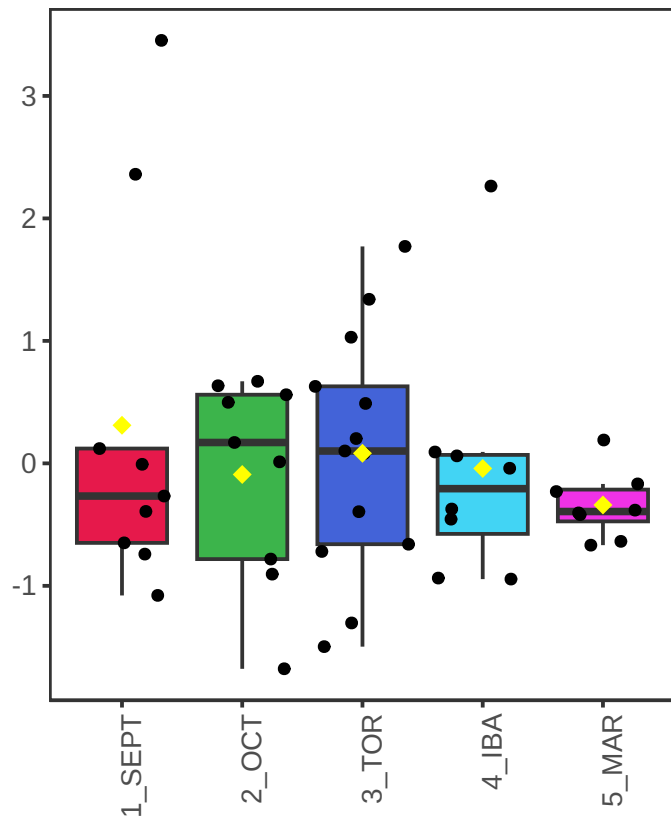

# Tryptophan

Original Conc.

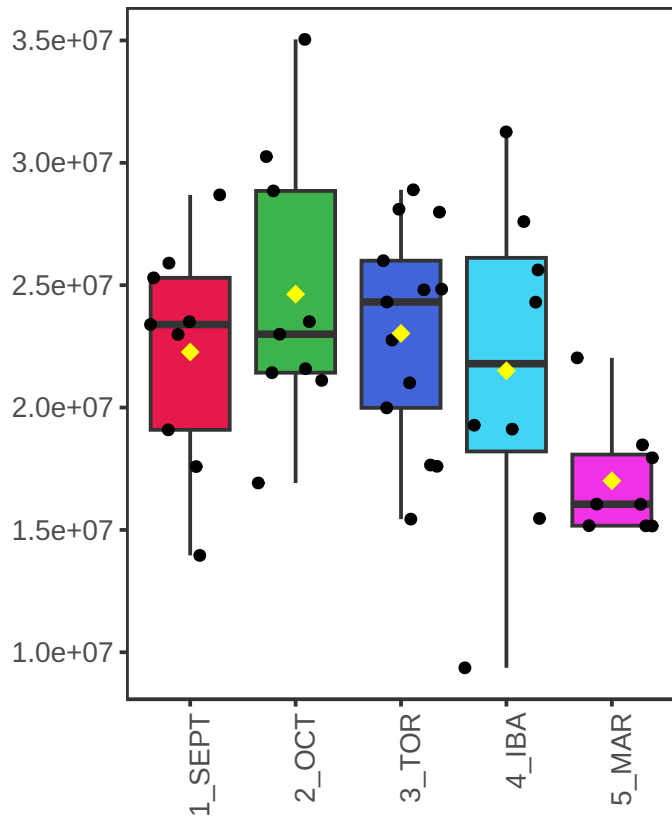

Normalized Conc.

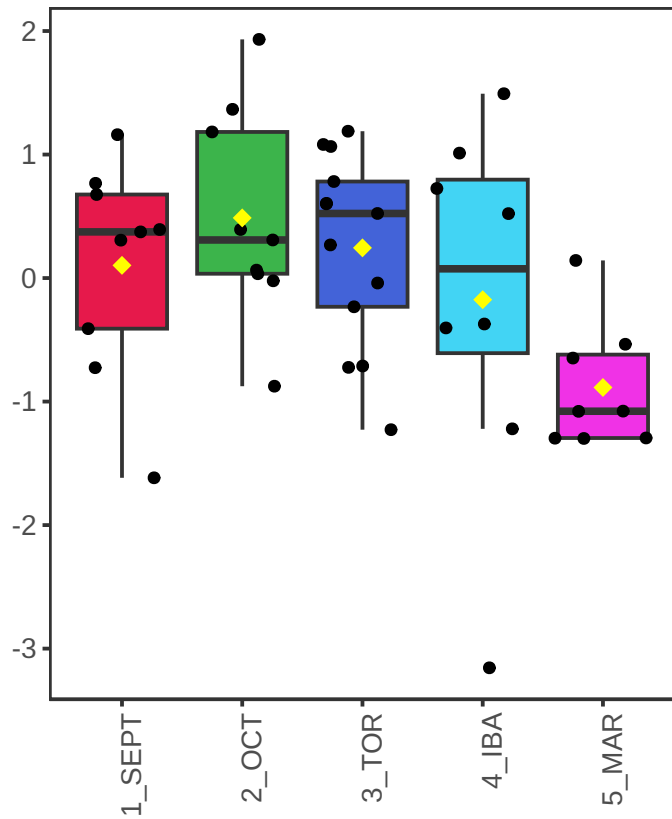

# Urea

Original Conc.

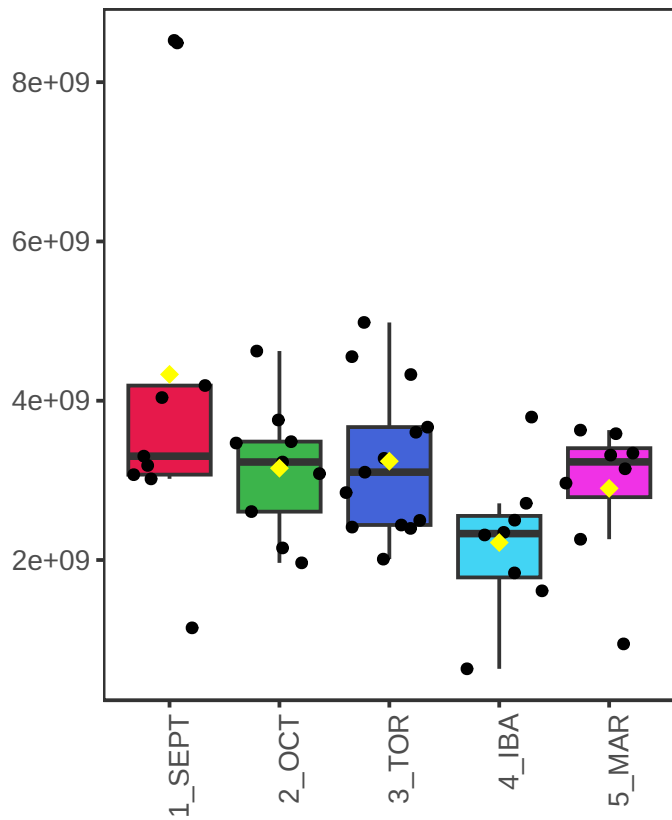

Normalized Conc.

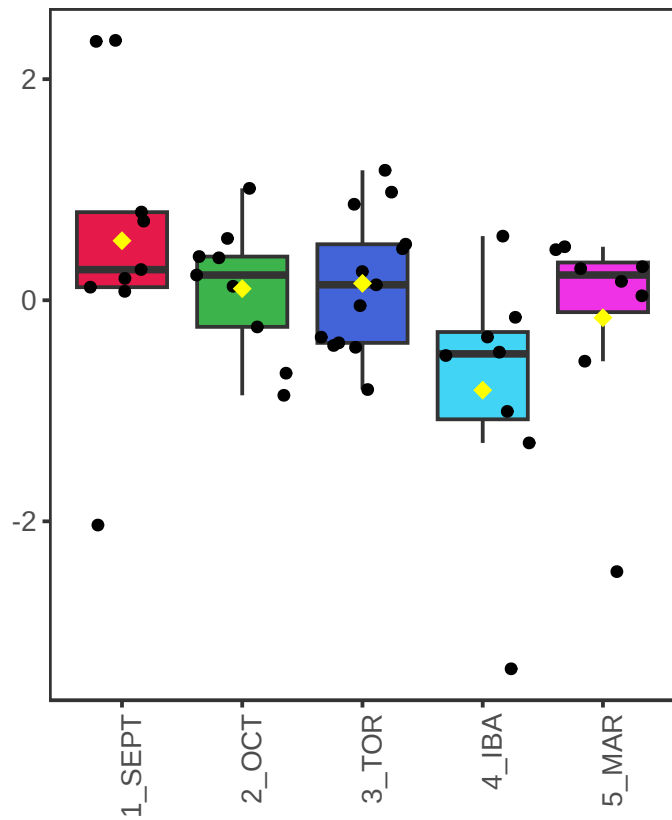

# Uridine monophosphate

Original Conc.

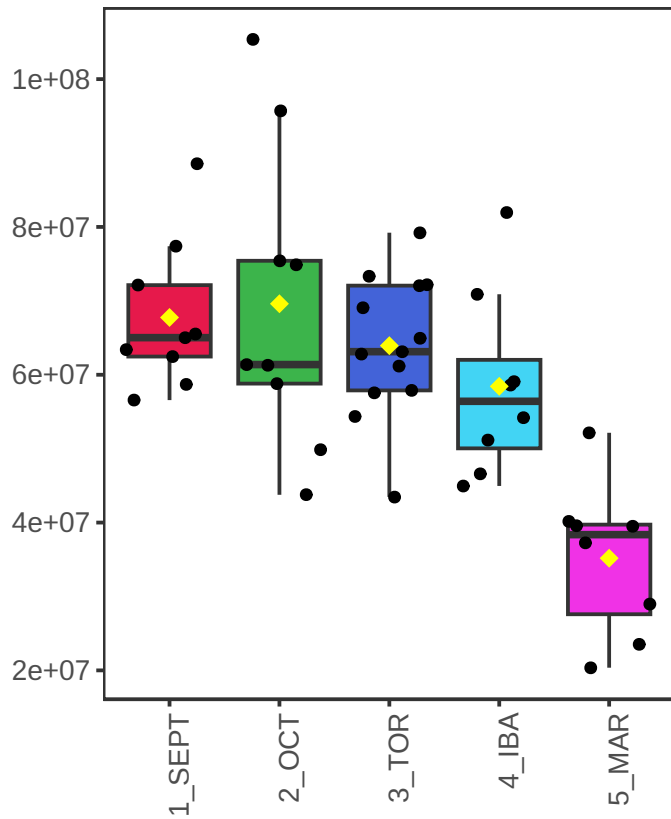

Normalized Conc.

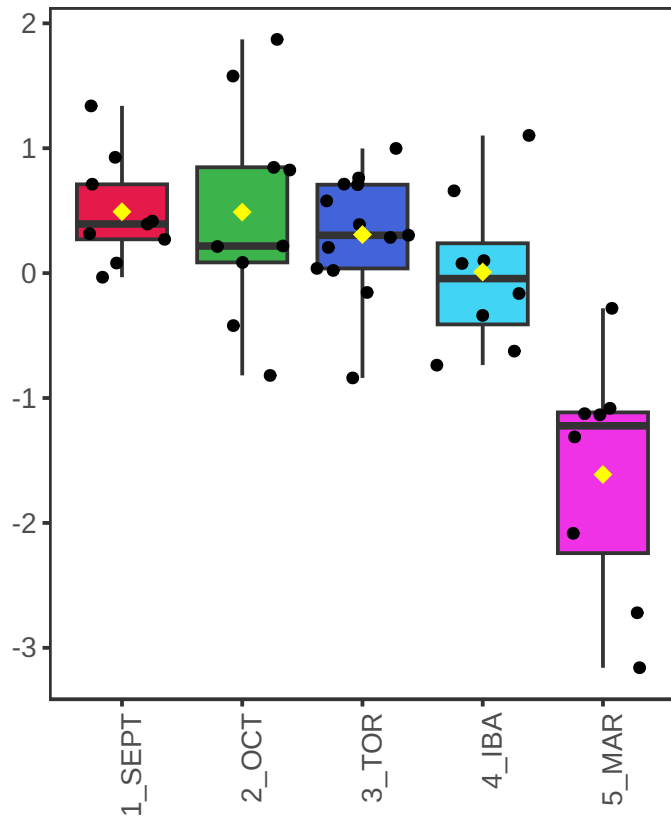

# Urocanic acid

Original Conc.

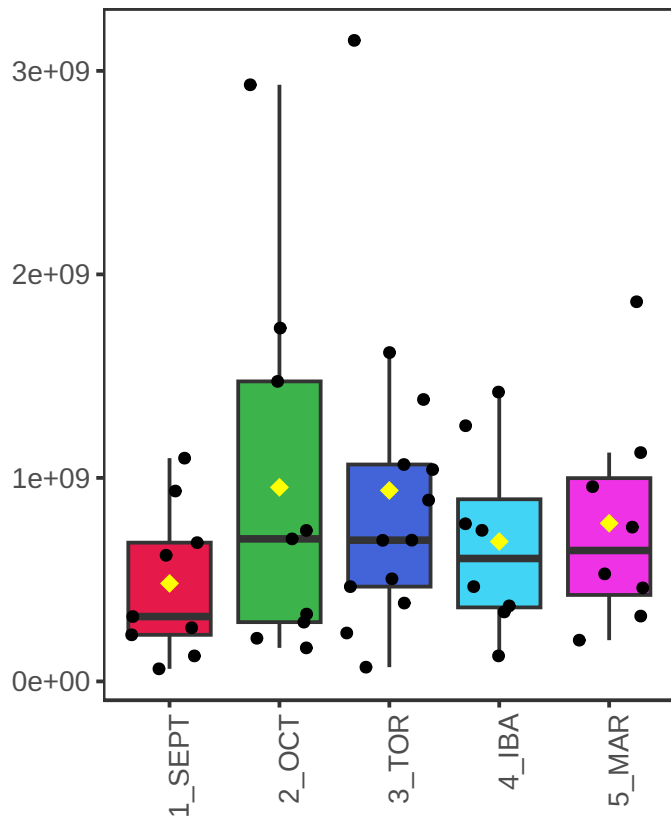

Normalized Conc.

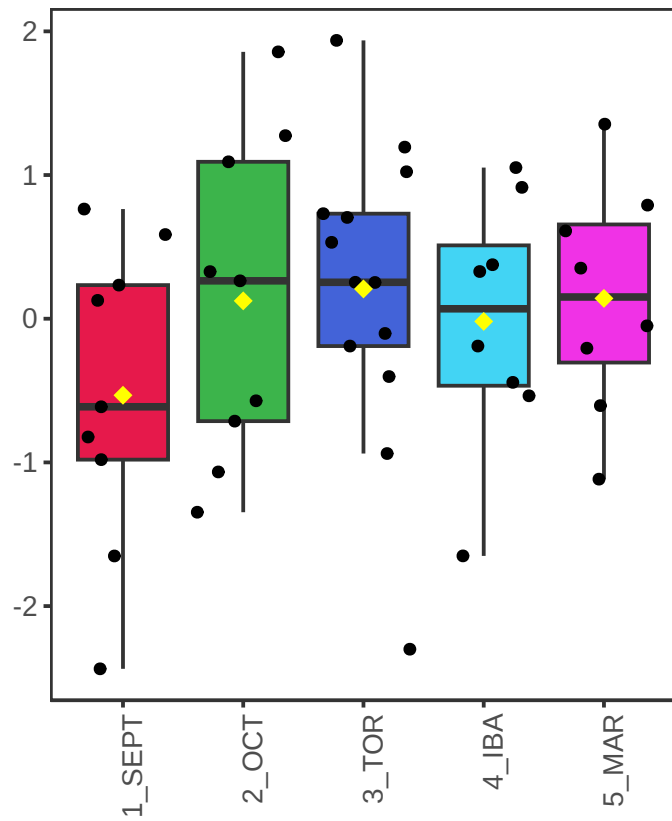

# Vinylglycine

Original Conc.

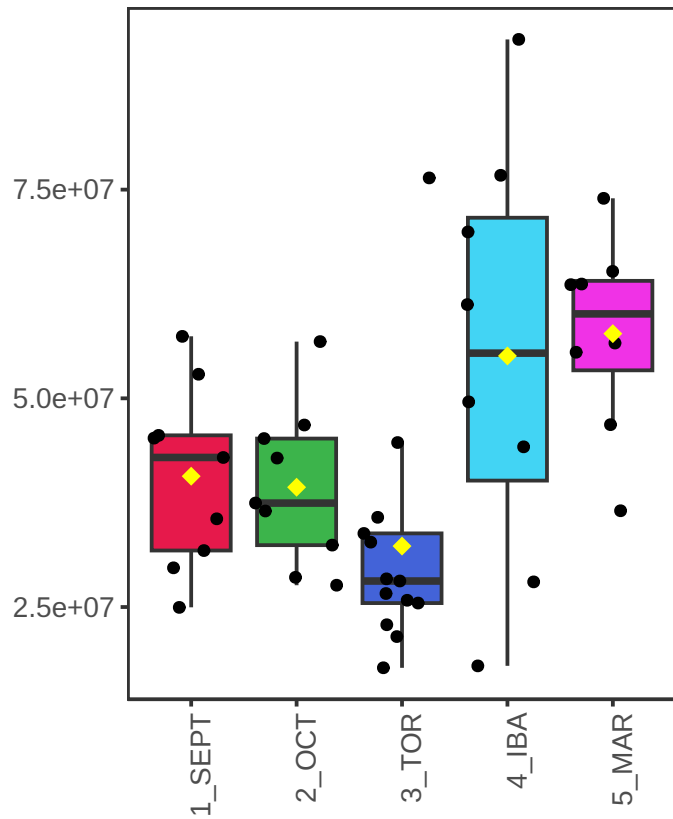

Normalized Conc.

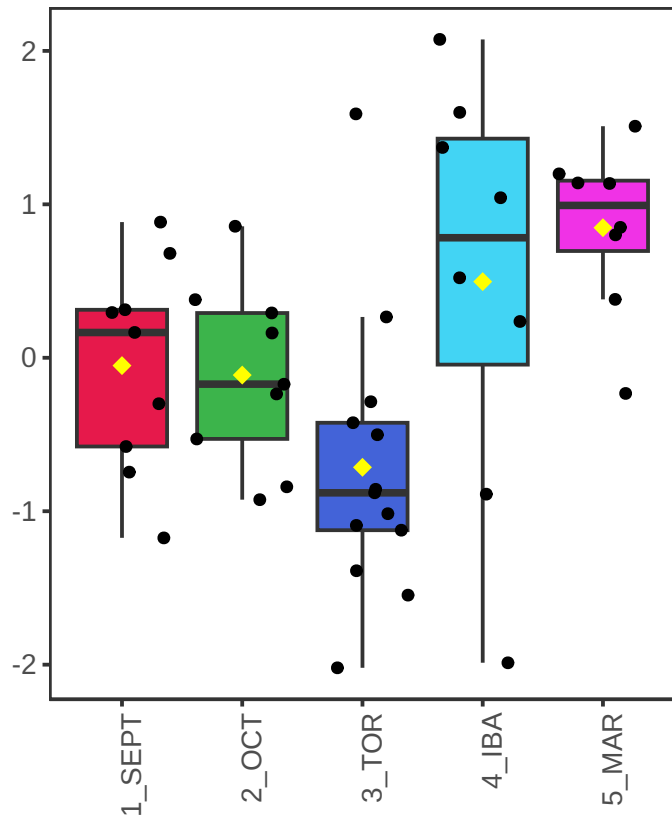

Supplement: Image2.pdf [file Image2.pdf]
