# Supplementary material for: Mass spectrometry of the white adipose metabolome in a hibernating mammal reveals seasonal changes in alternate fuels and carnitine derivatives
Source: PubMed Central journal article supplement (PMC10337995; doi:10.3389/fphys.2023.1214087), 2023-06-28

## Figure S3

### Supplementary Figure 3: Boxplot Representations of all Annotated Features from the Negative Ion Mode

Collated feature intensity box plots for all annotated features in the negative ion mode. Left panel: original feature intensities from peak intensity table (Supplemental Table S2, tab 2). Right panel: feature intensities after  $\log_{10}$  transformation and auto scaling (values mean-centered and divided by the standard deviation).

# 2-Aminonicotinic acid

Original Conc.

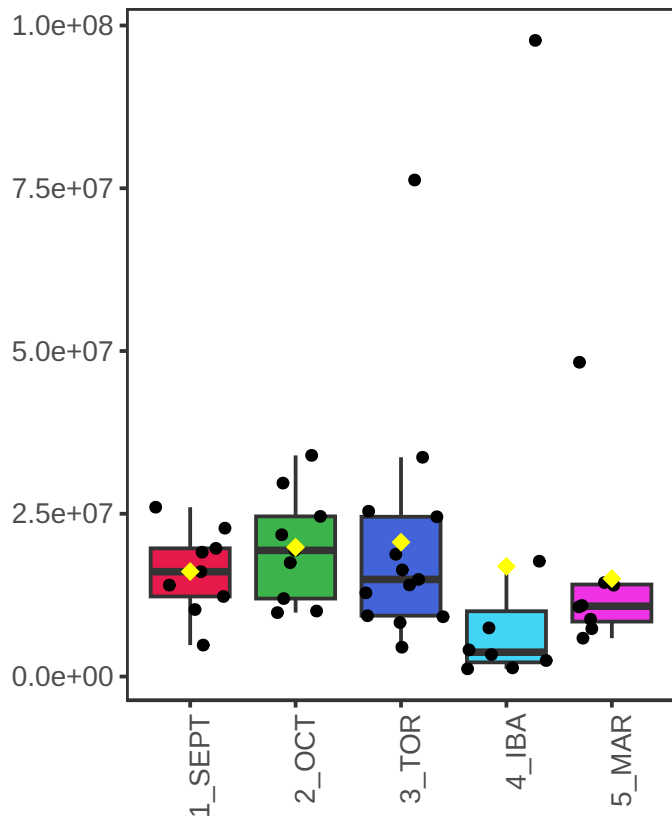

Normalized Conc.

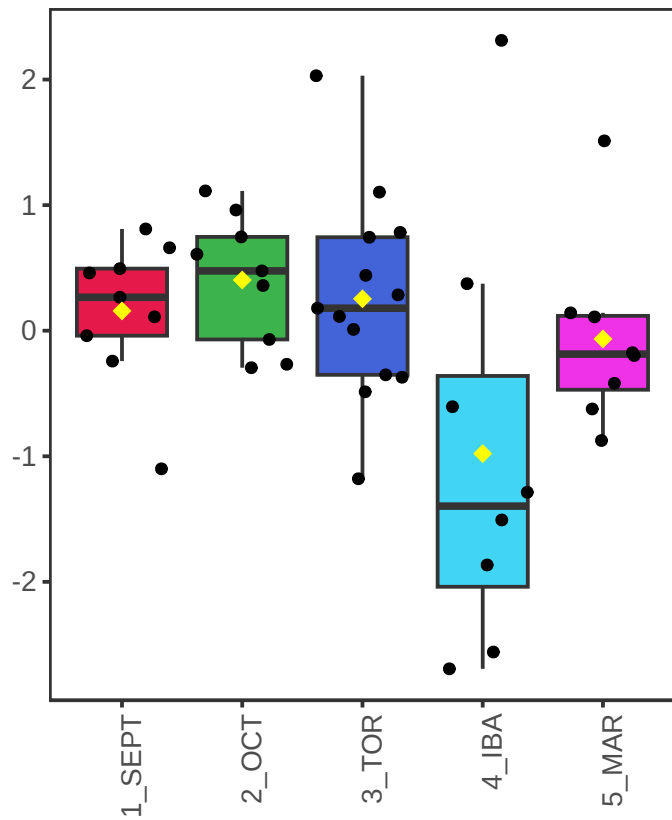

# 2-Hydroxyhippuric acid

Original Conc.

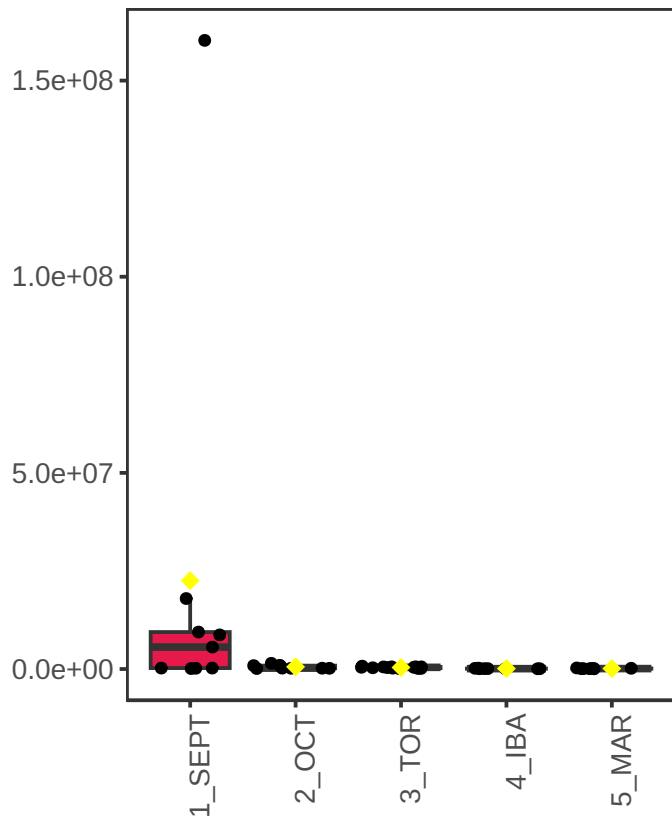

Normalized Conc.

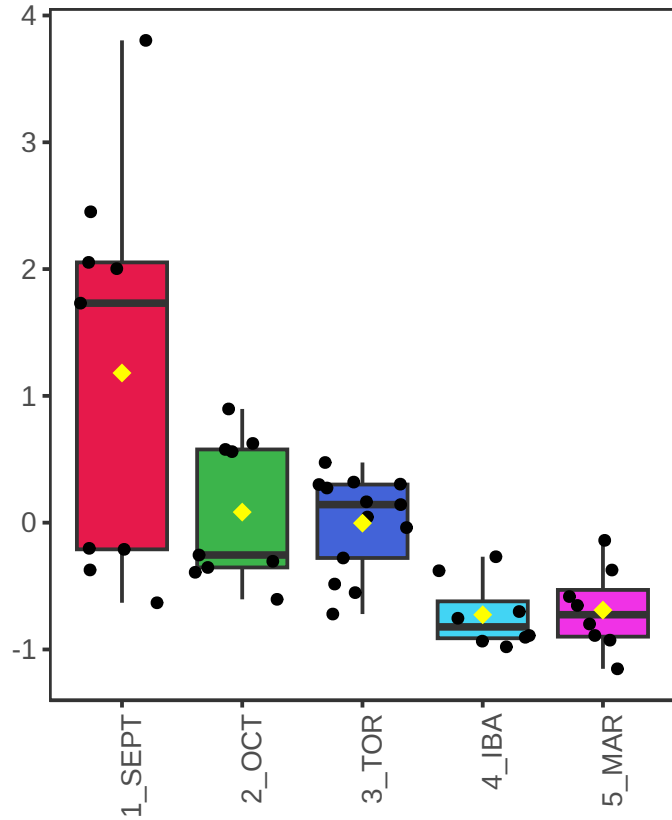

# 2-Oxobutyric acid

Original Conc.

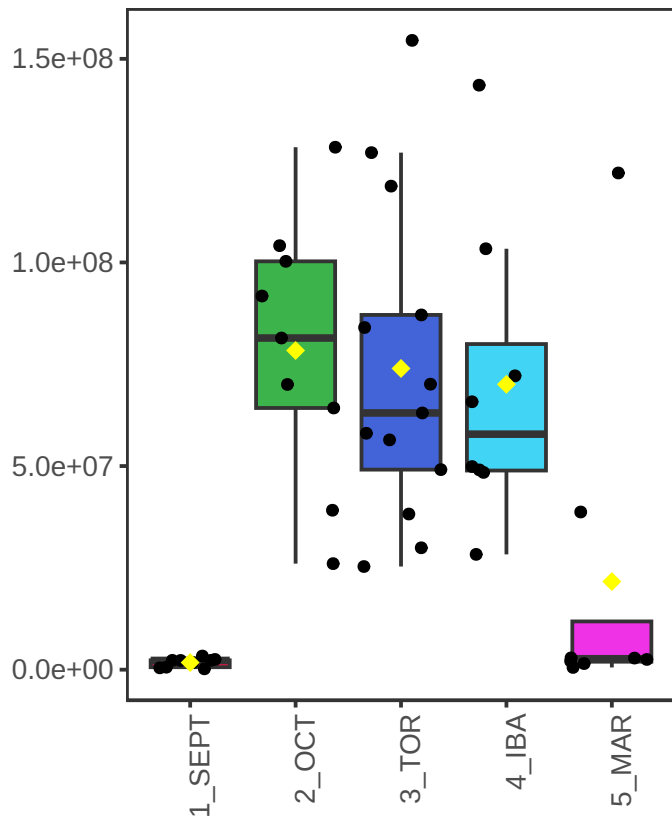

Normalized Conc.

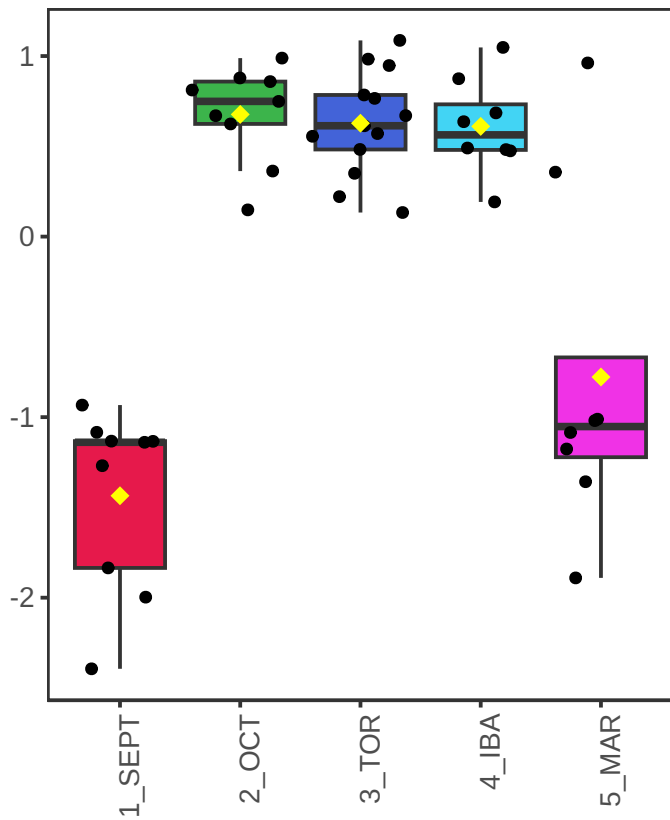

# 3-Hydroxyvaleric acid

Original Conc.

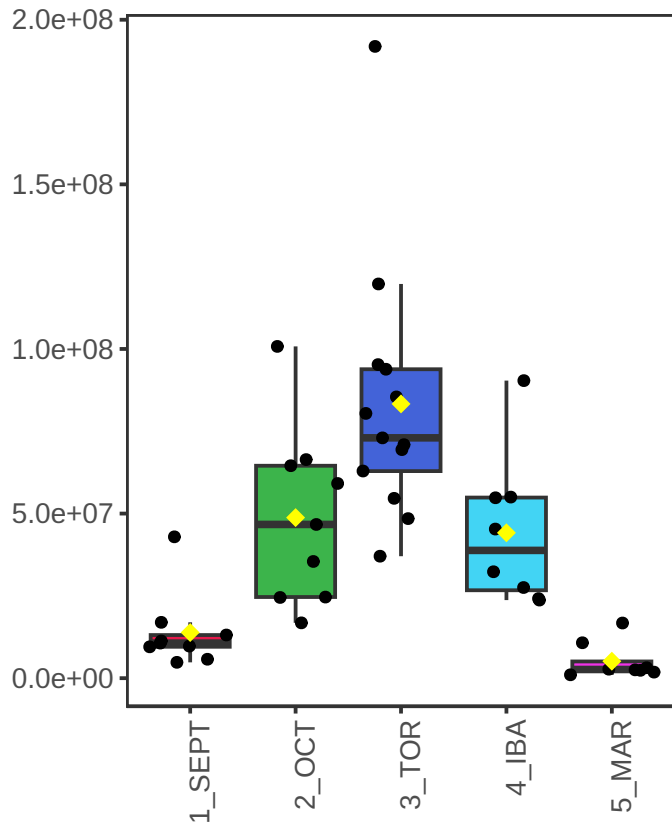

Normalized Conc.

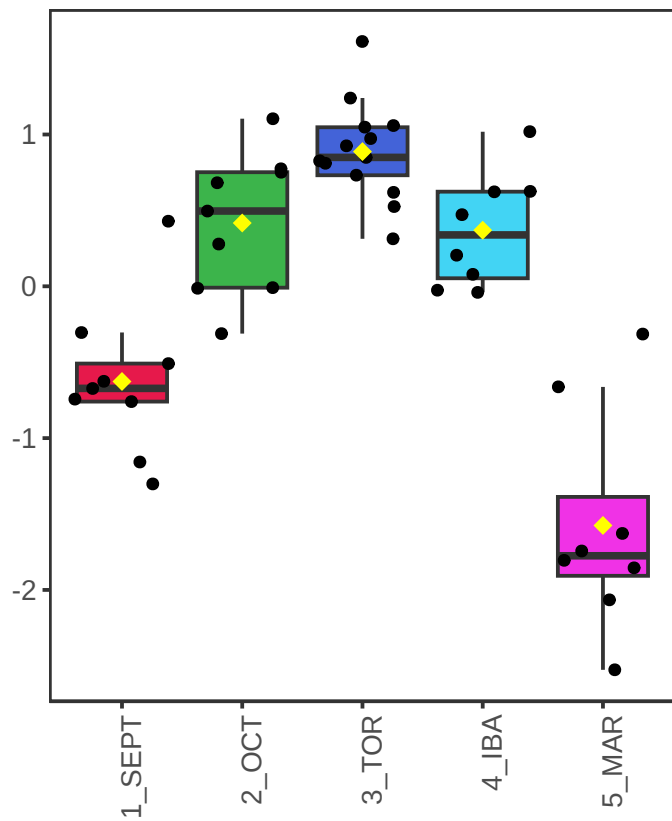

# 3-Methoxyphenylacetic acid

Original Conc.

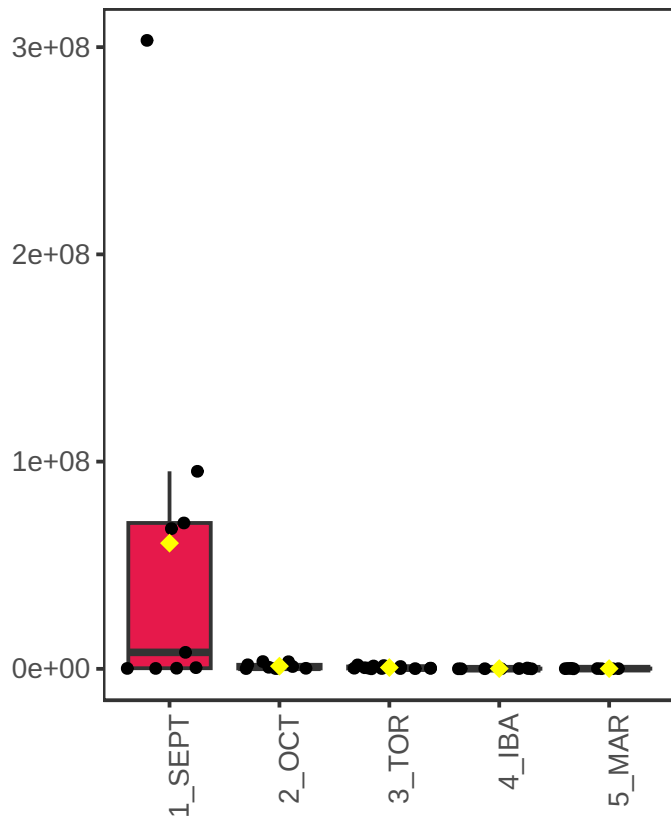

Normalized Conc.

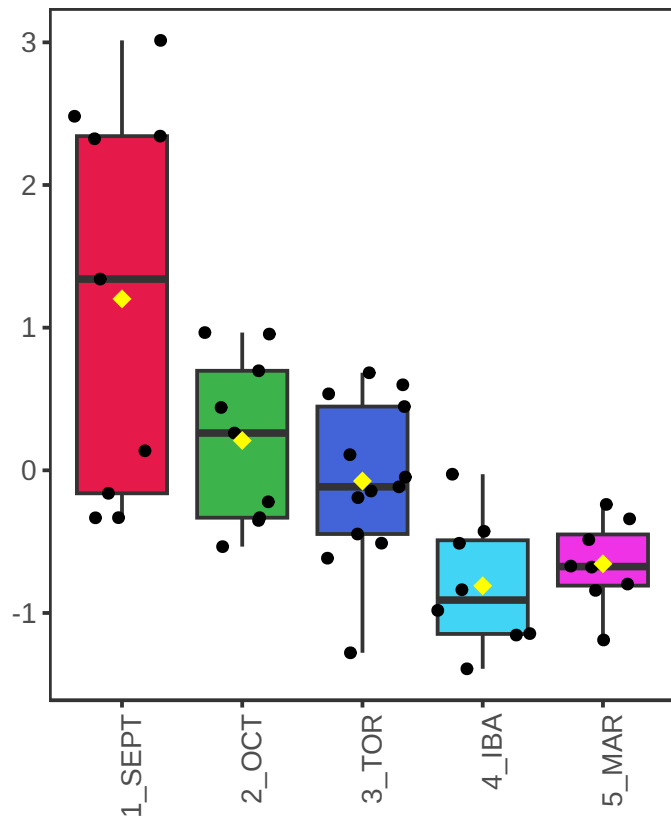

# 3-Octenedioic acid

Original Conc.

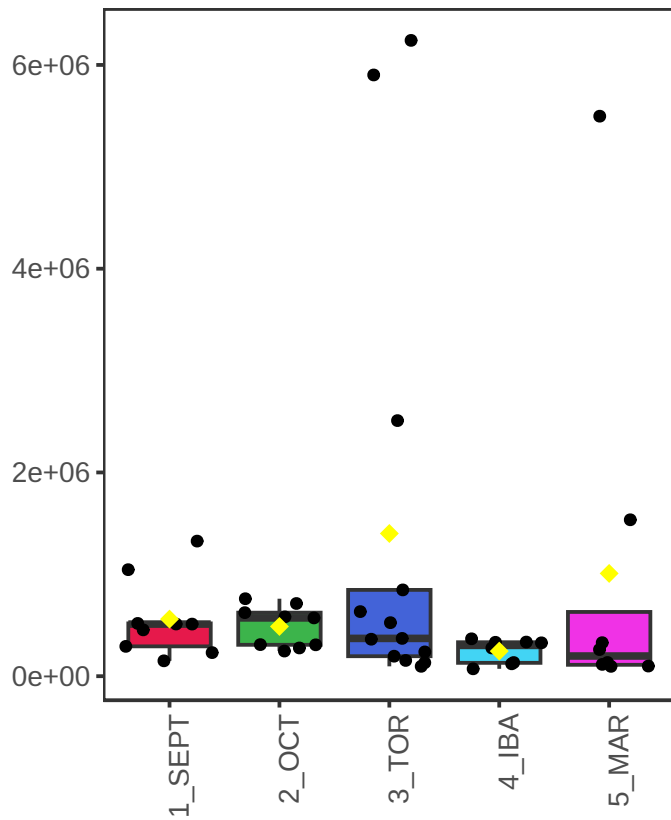

Normalized Conc.

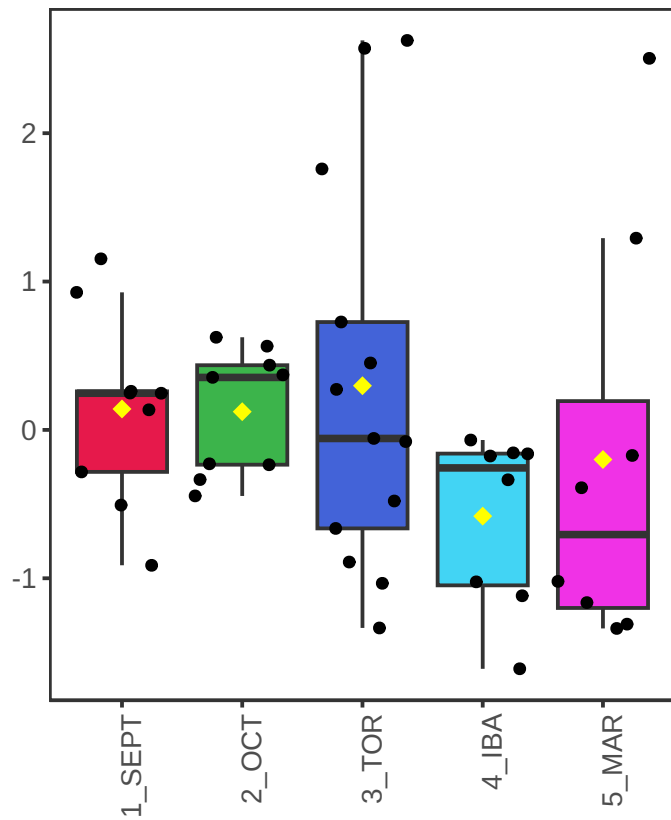

# 3-tert-Butyladipic acid

Original Conc.

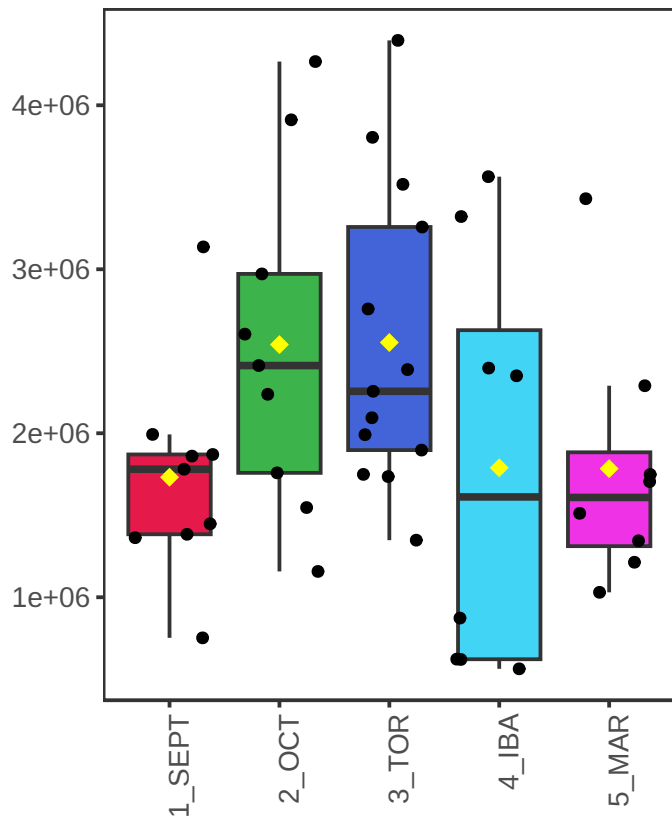

Normalized Conc.

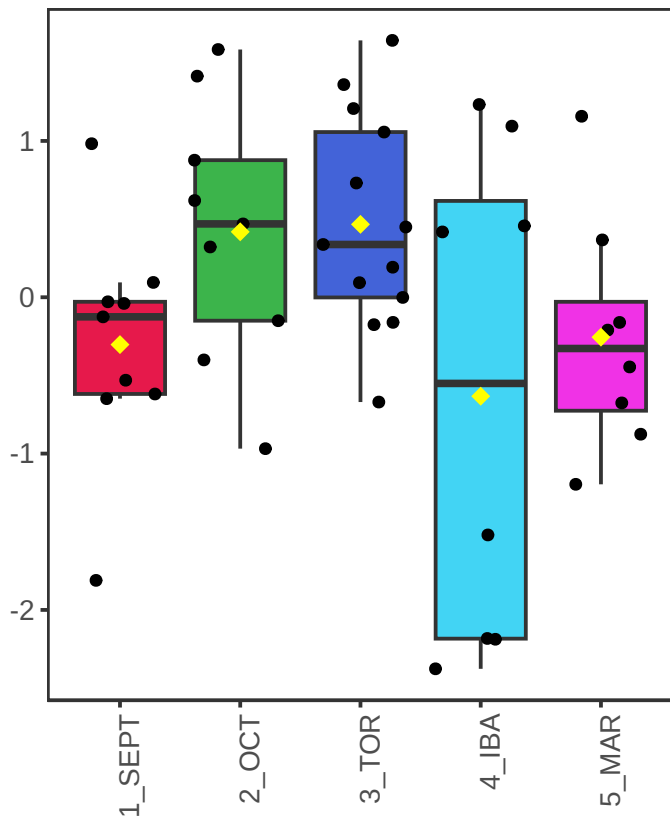



# 4-Acetamidobenzoic acid

Original Conc.

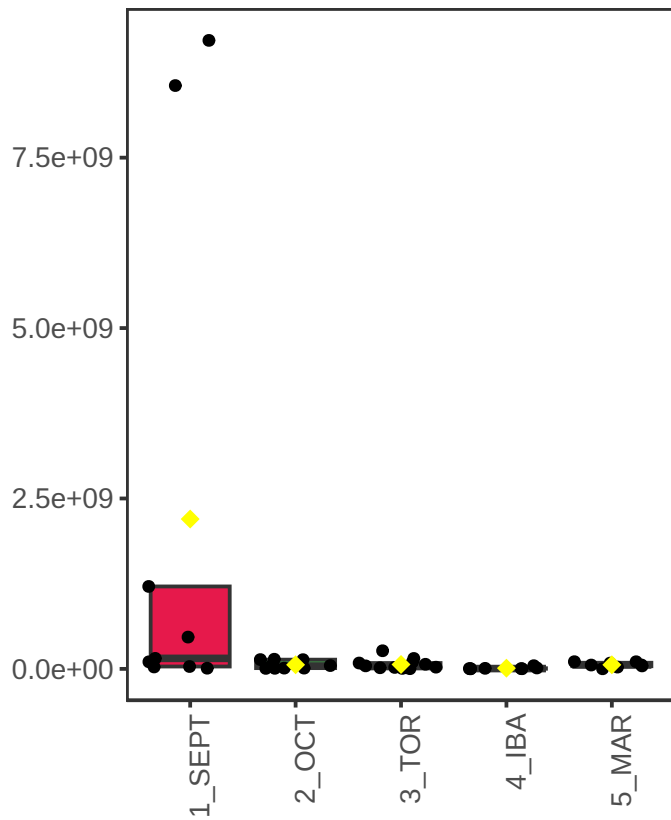

Normalized Conc.

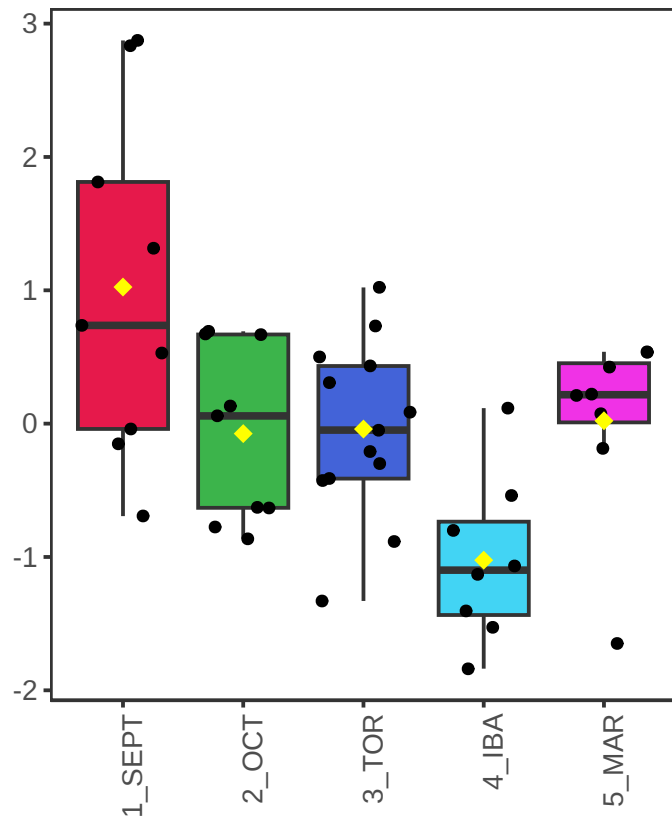

# 4-Acetamidobutanoic acid

Original Conc.

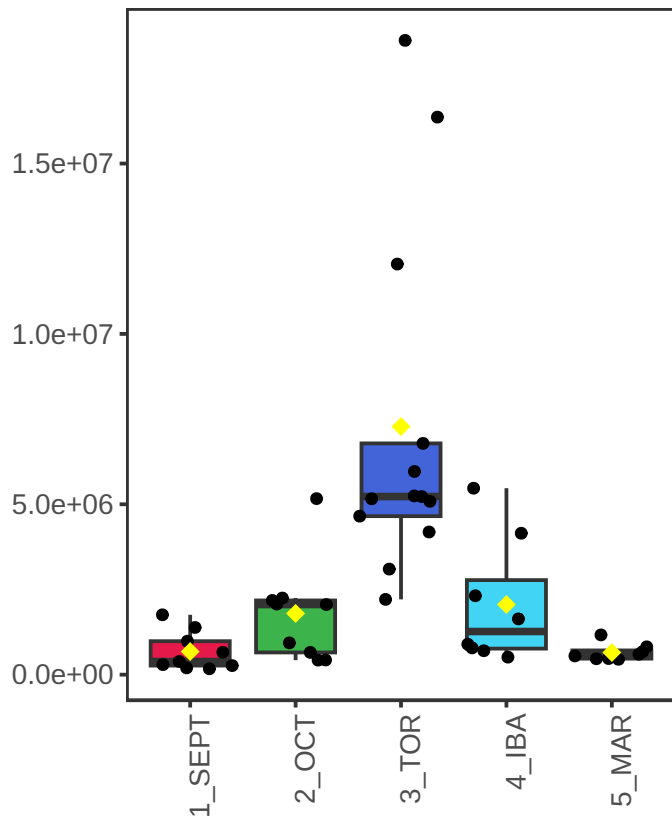

Normalized Conc.

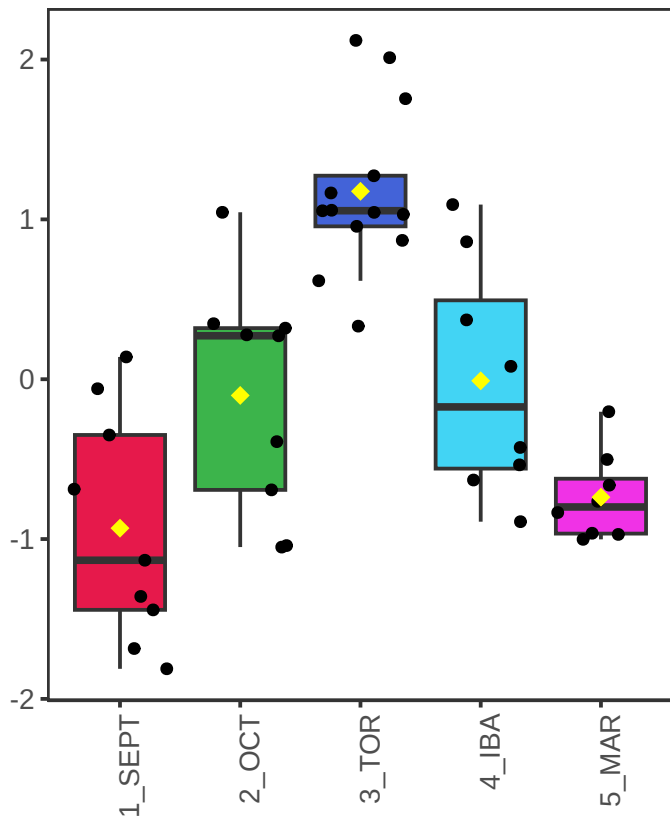

# 5-Decenedioic acid

Original Conc.

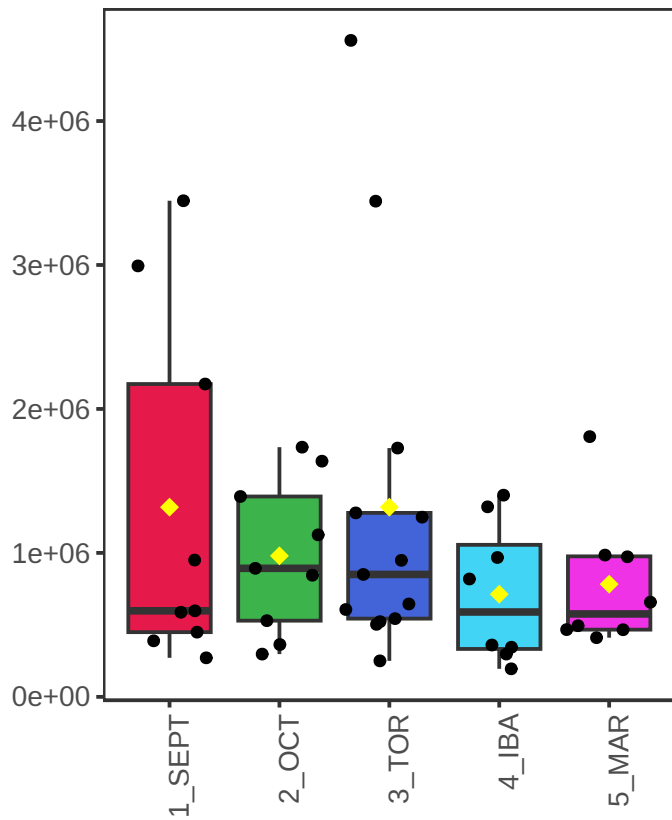

Normalized Conc.

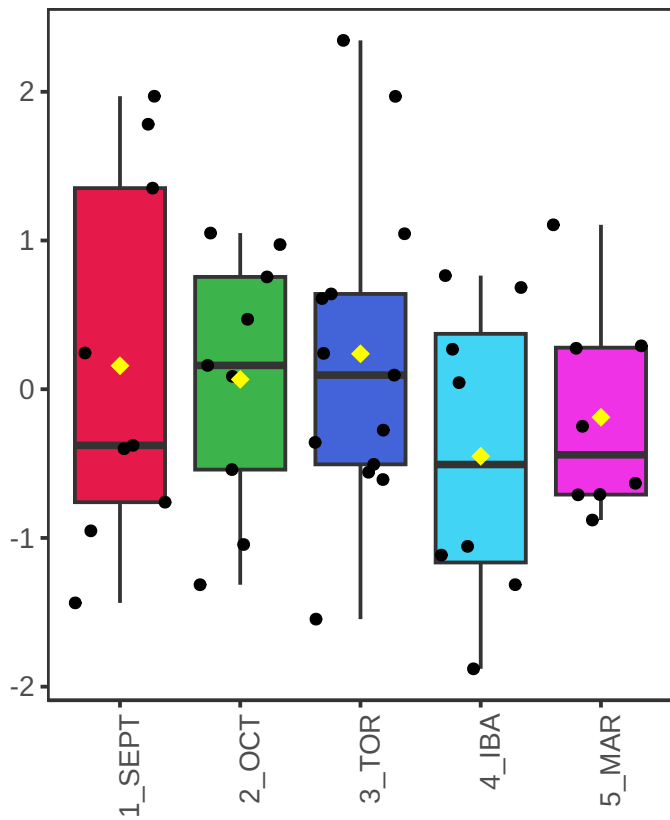

# 5-Hydroxycaproic acid

Original Conc.

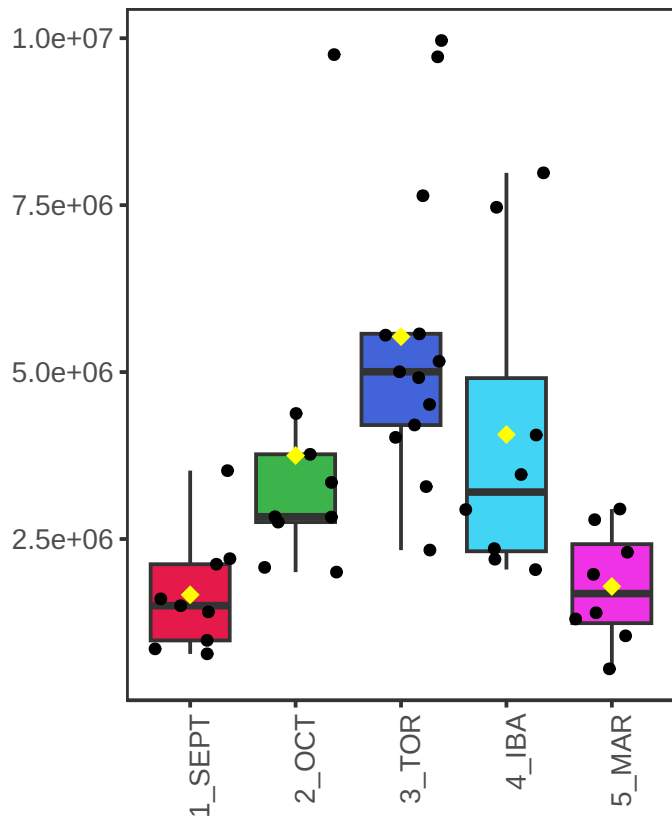

Normalized Conc.

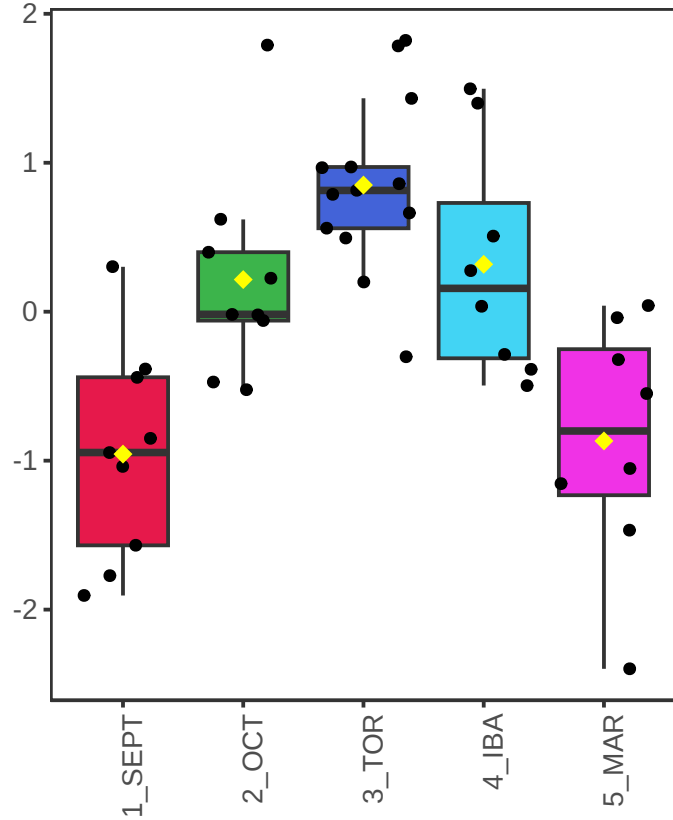

# 5-Hydroxytryptophan

Original Conc.

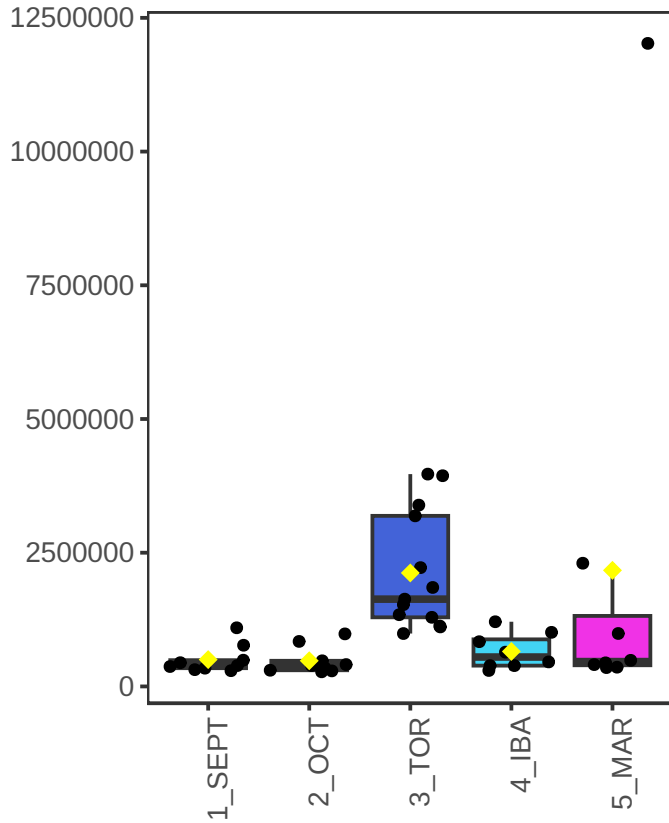

Normalized Conc.

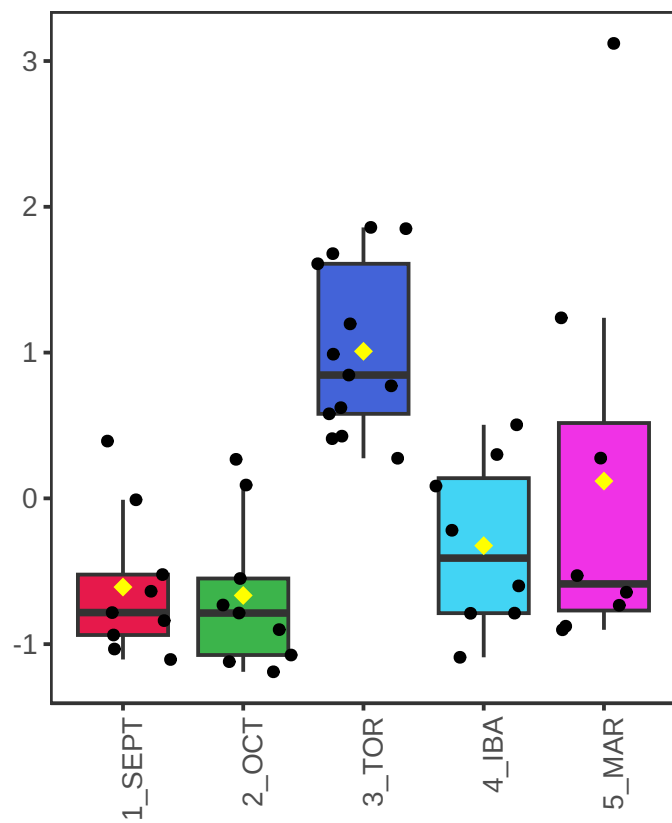

# 9,12,13-Trihydroxy-15-octadecenoic acid

Original Conc.

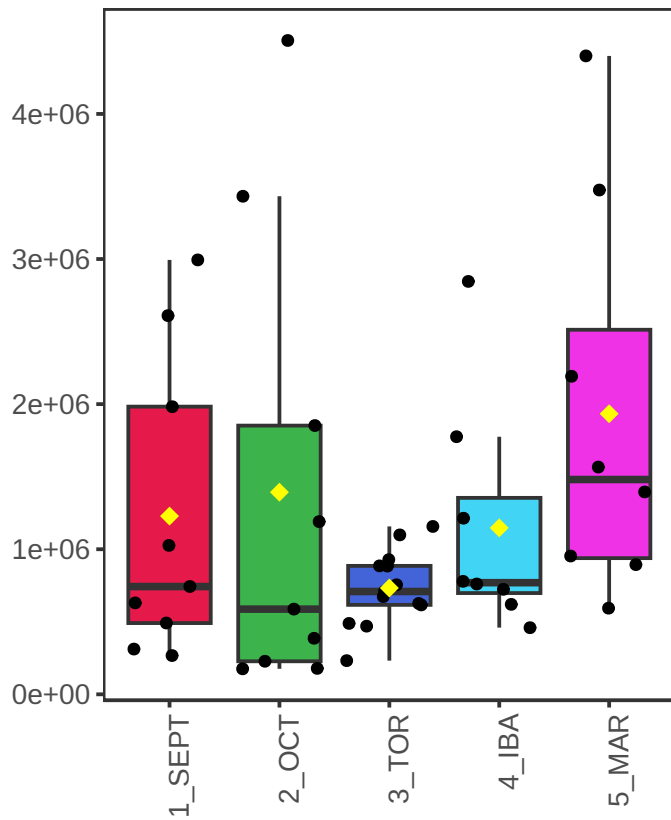

Normalized Conc.

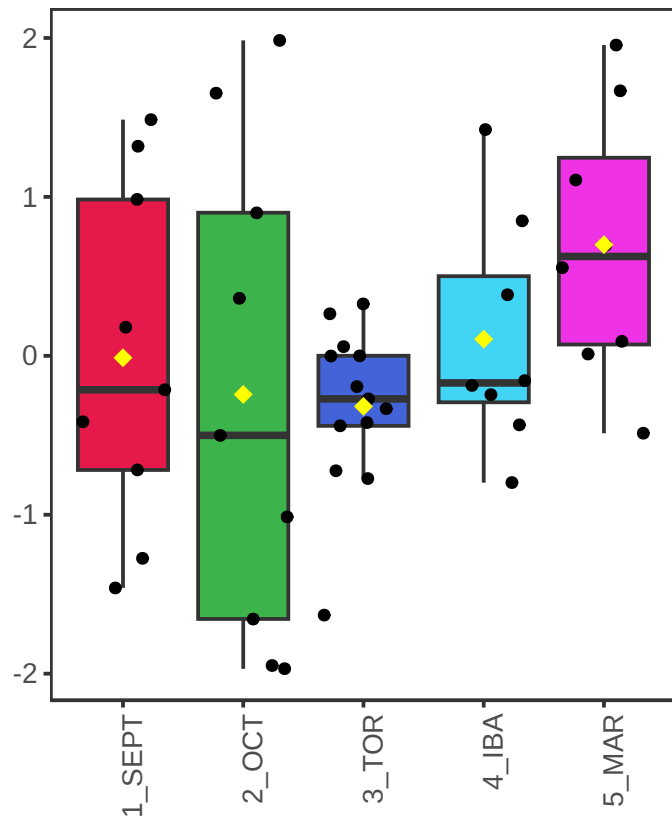

# Adenosine

## Original Conc.

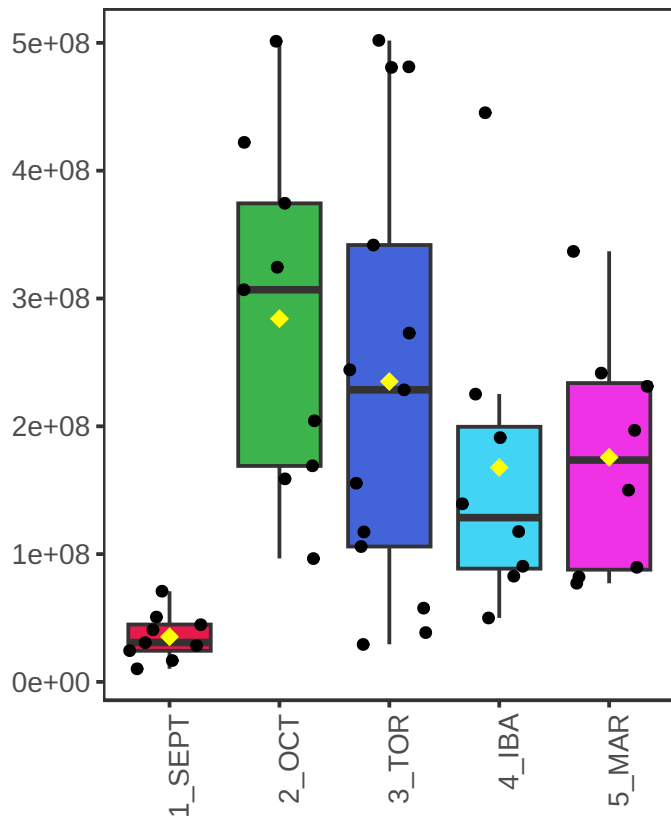

## Normalized Conc.

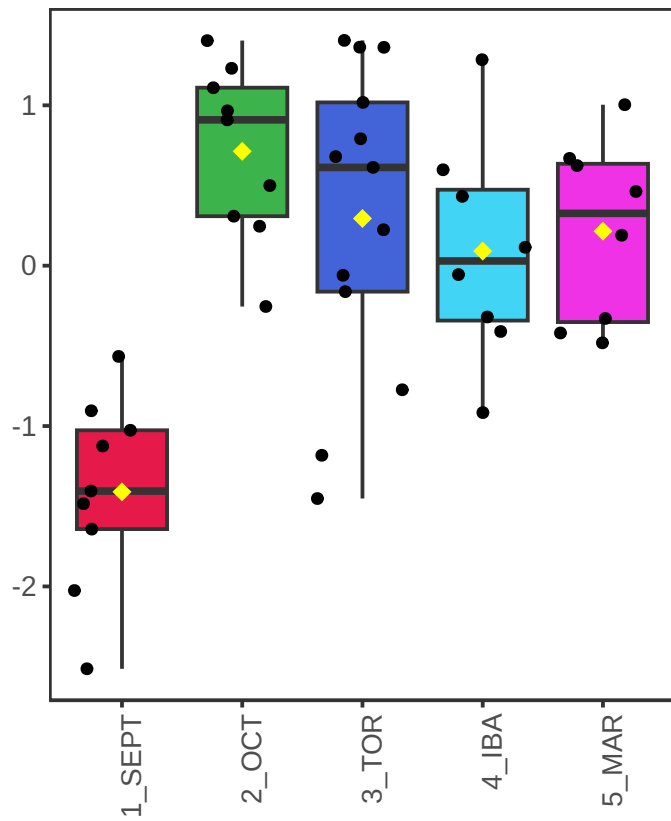

# Adipic acid

Original Conc.

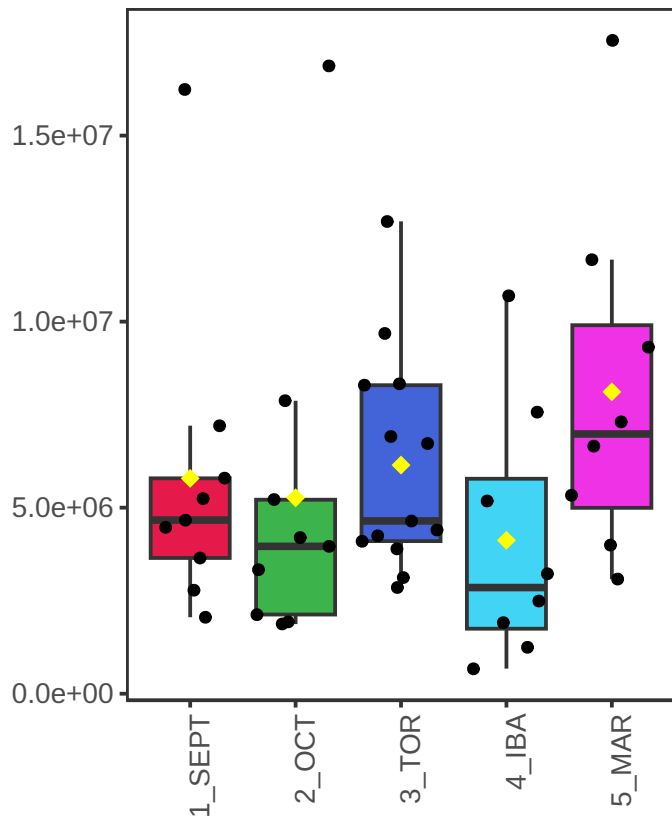

Normalized Conc.

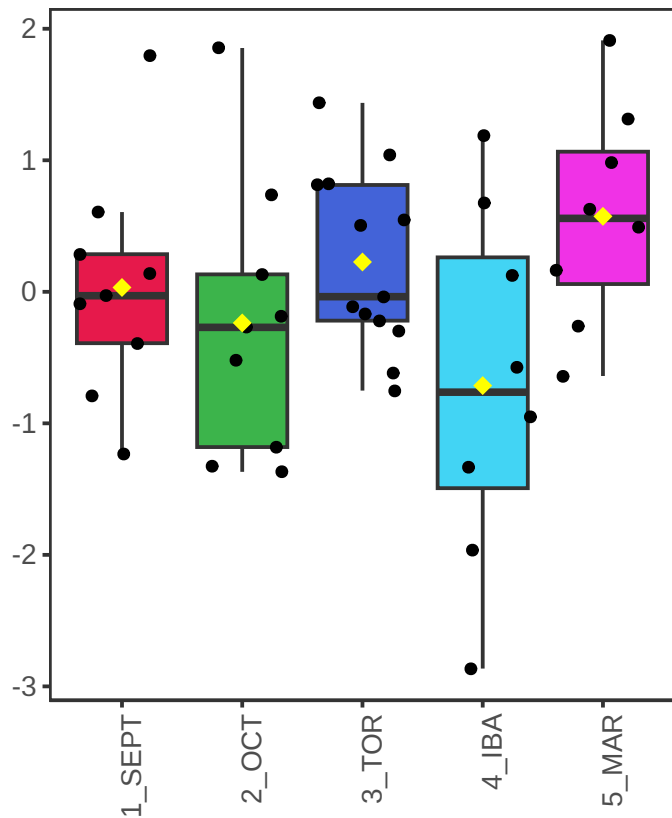



# Alanine

Original Conc.

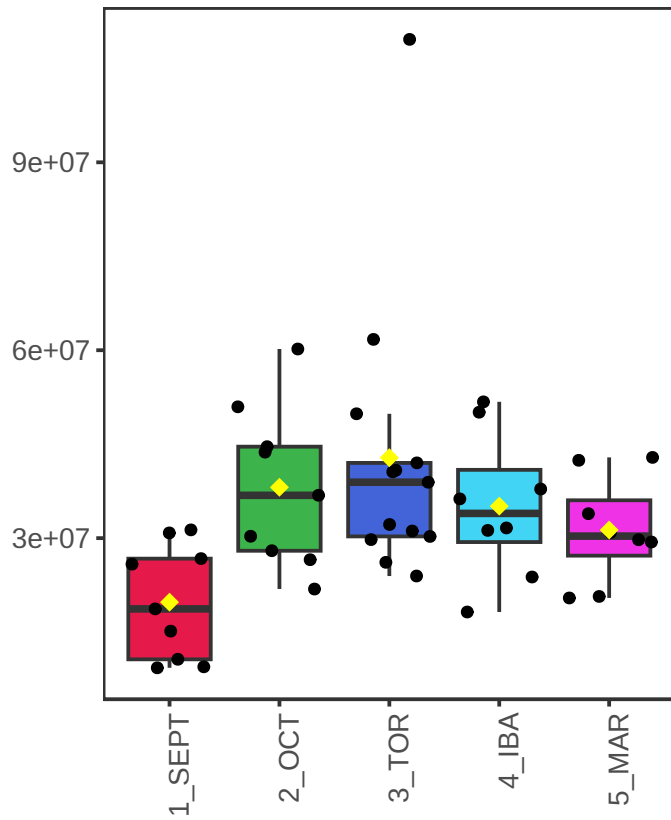

Normalized Conc.

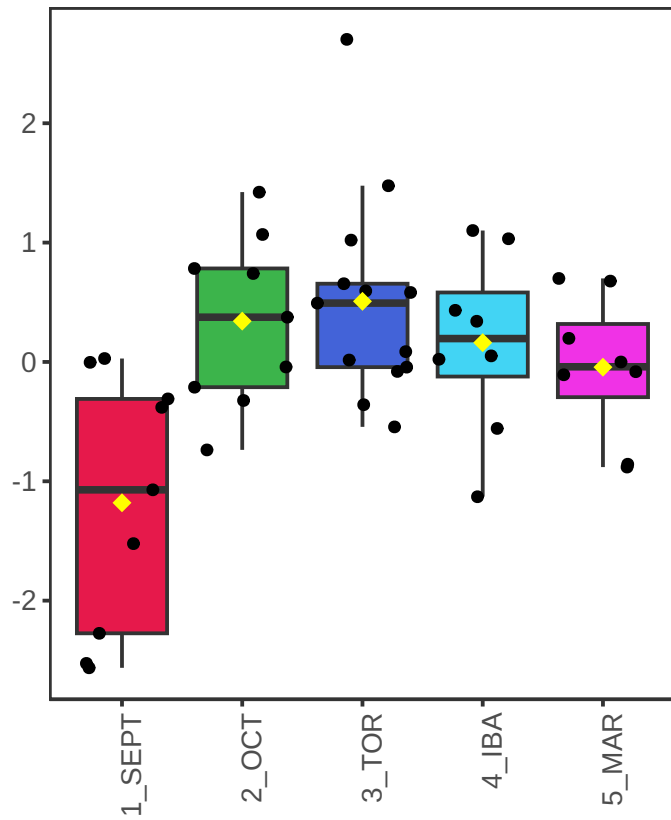

# Allantoin

Original Conc.

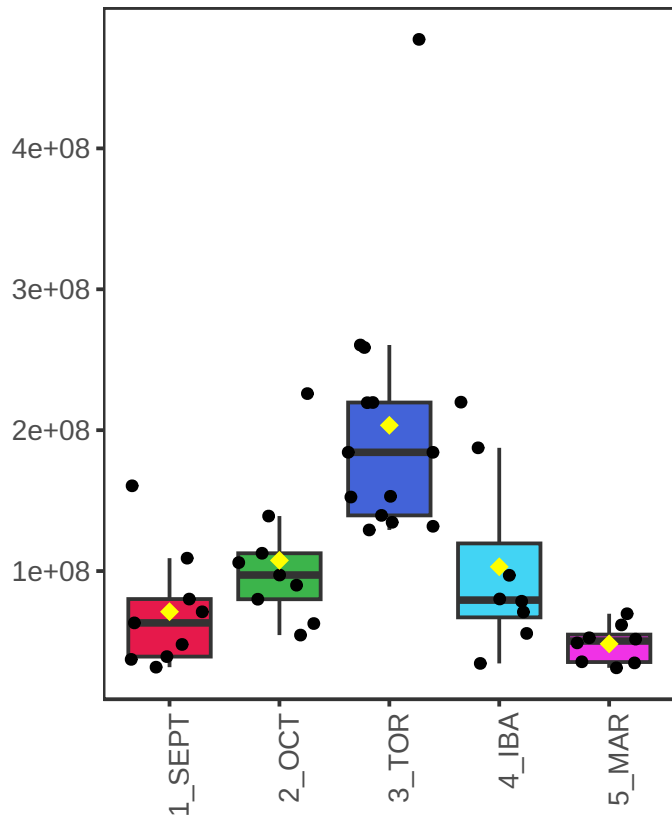

Normalized Conc.

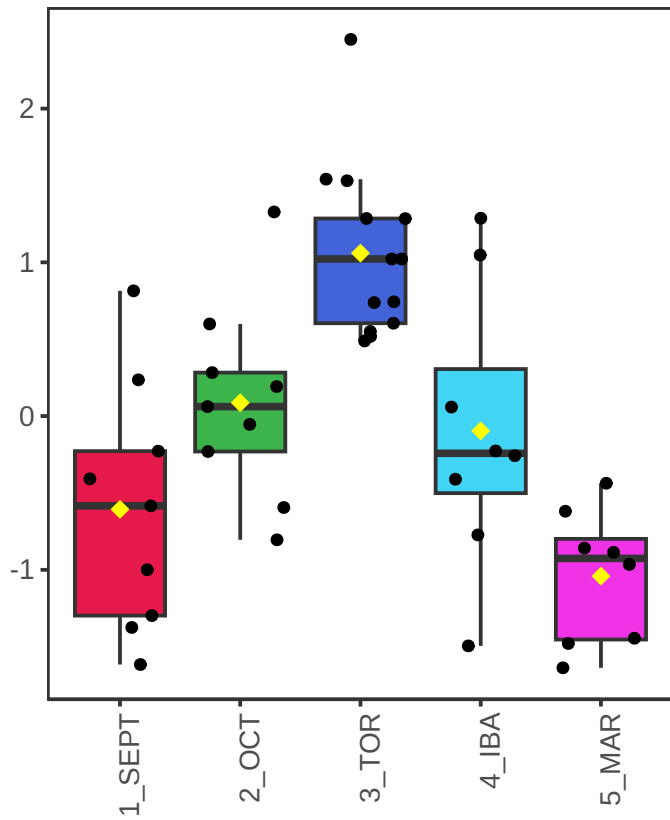

# alpha-Aminoacidic acid

Original Conc.

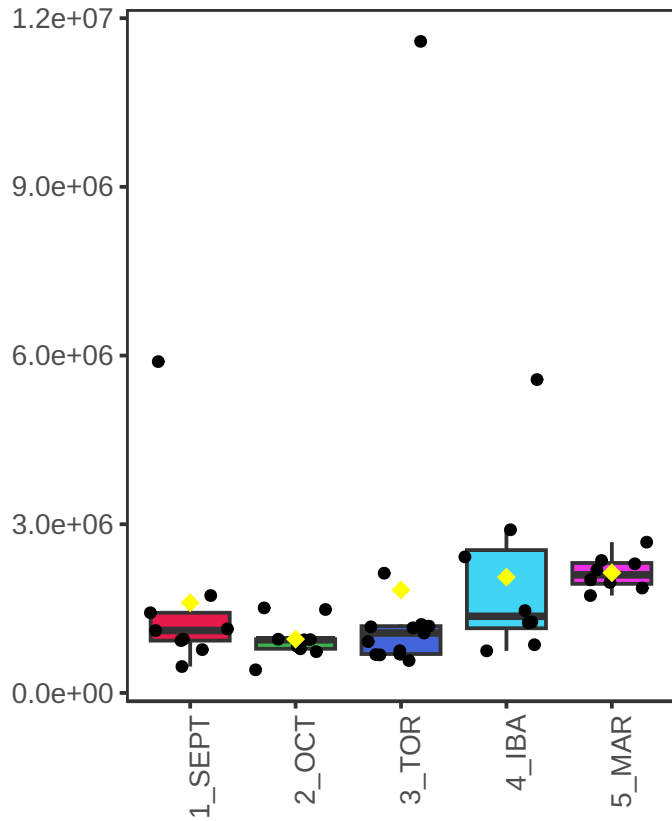

Normalized Conc.

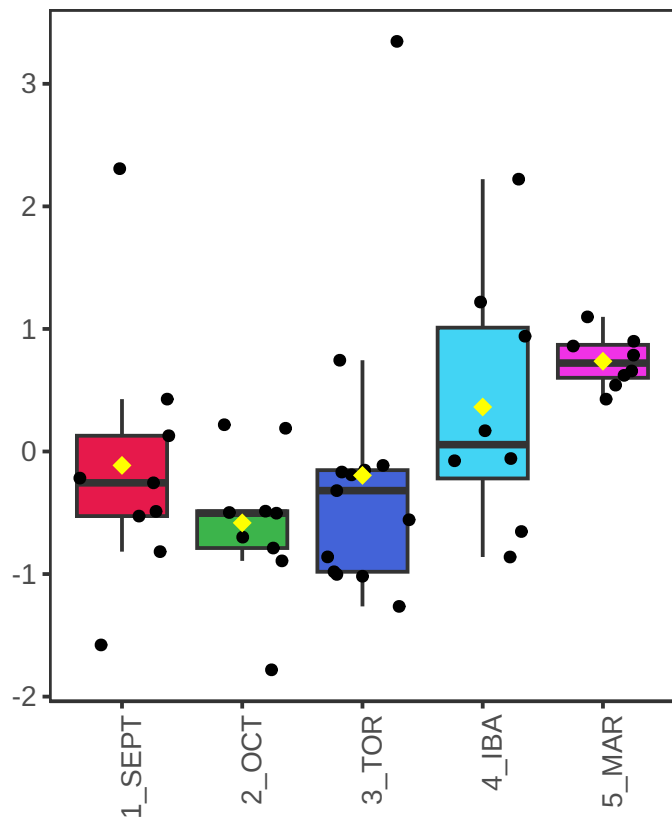

# Aminolevulinic acid

Original Conc.

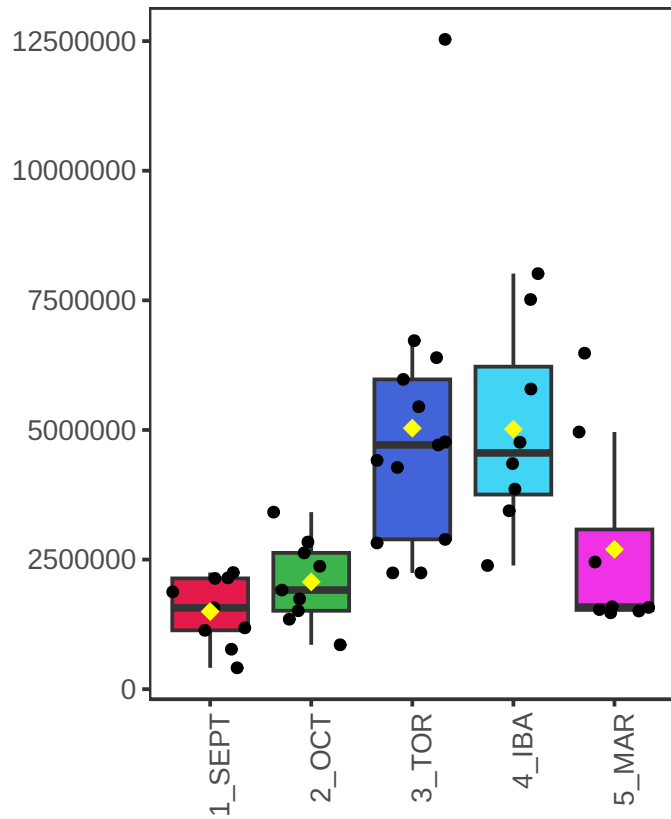

Normalized Conc.

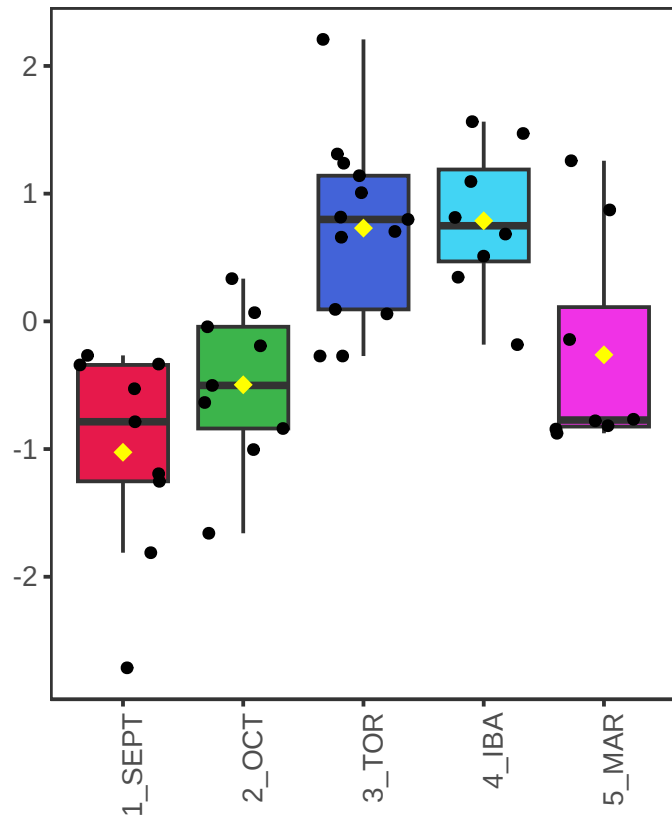

# Arabinosylhypoxanthine

Original Conc.

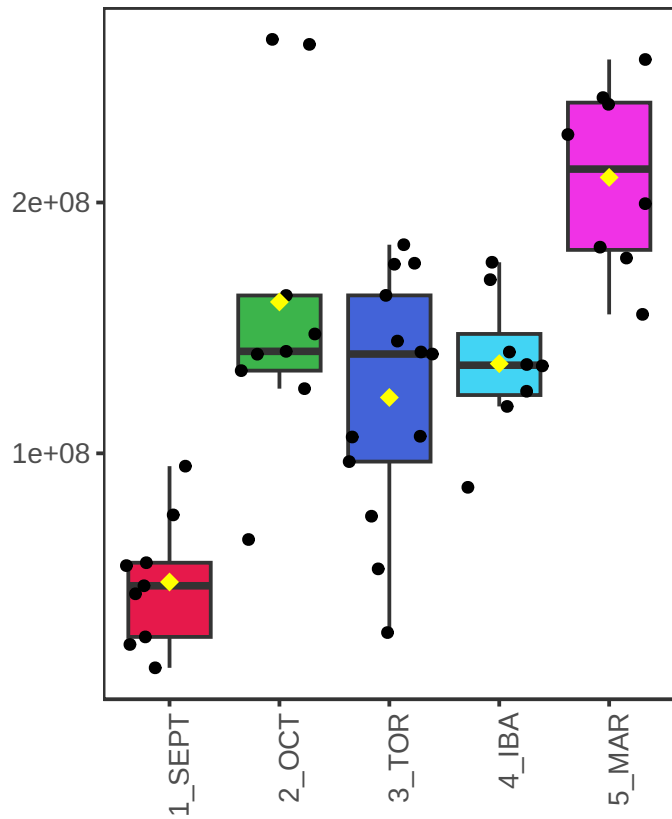

Normalized Conc.

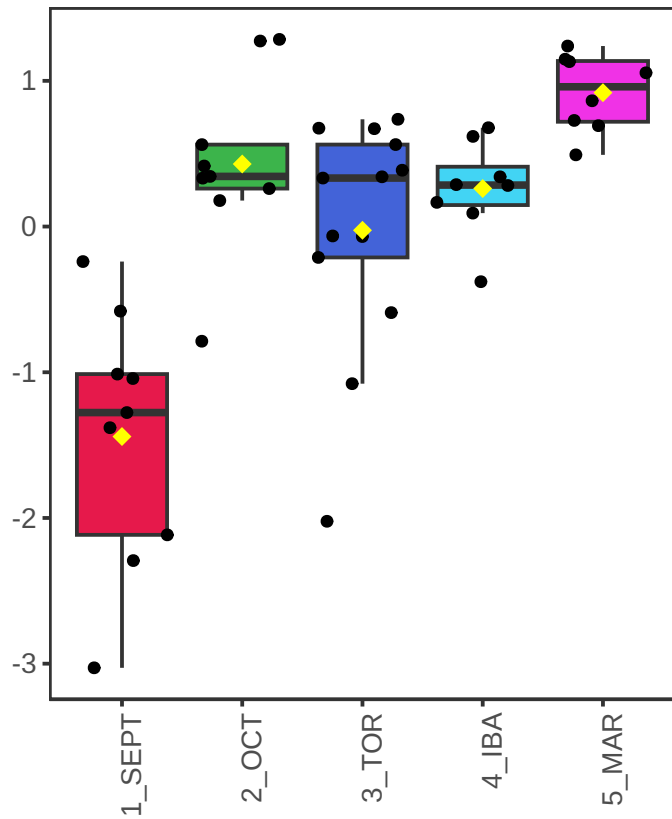

# Asparagine

Original Conc.

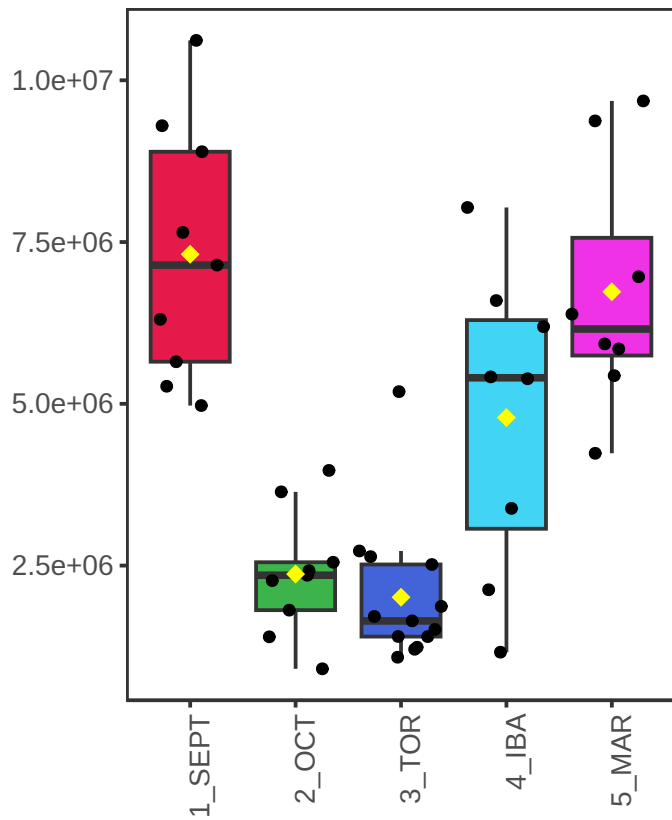

Normalized Conc.

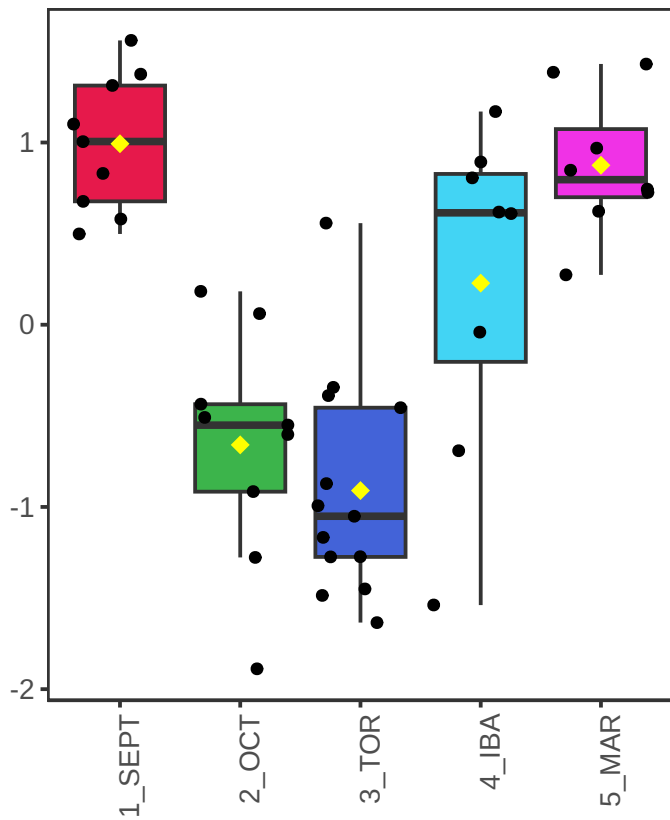

# Aspartic acid

Original Conc.

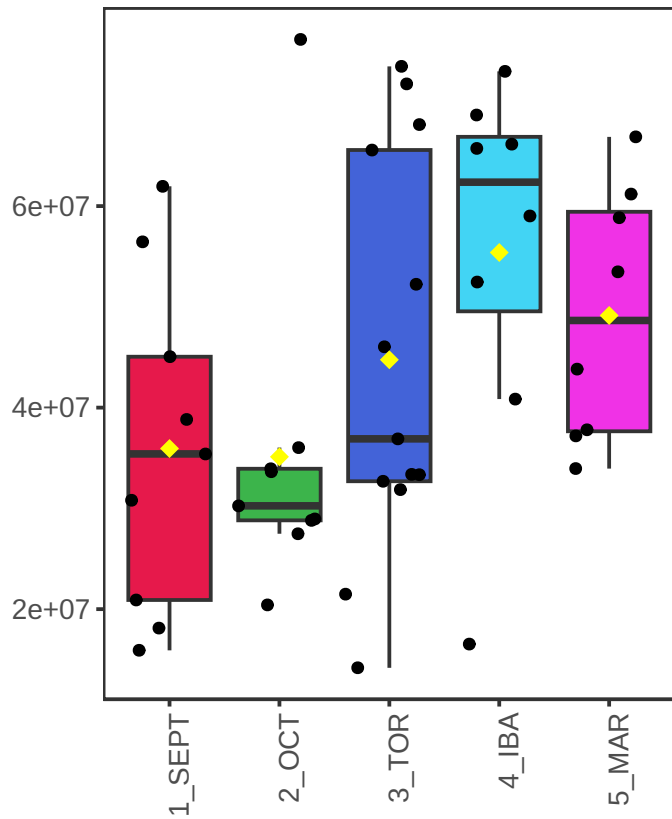

Normalized Conc.

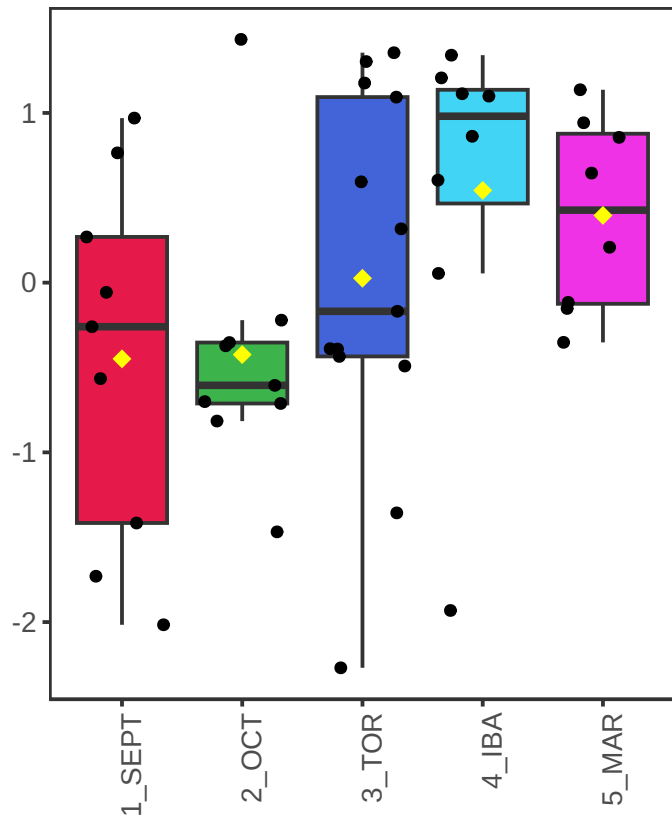

# Azelaic acid

Original Conc.

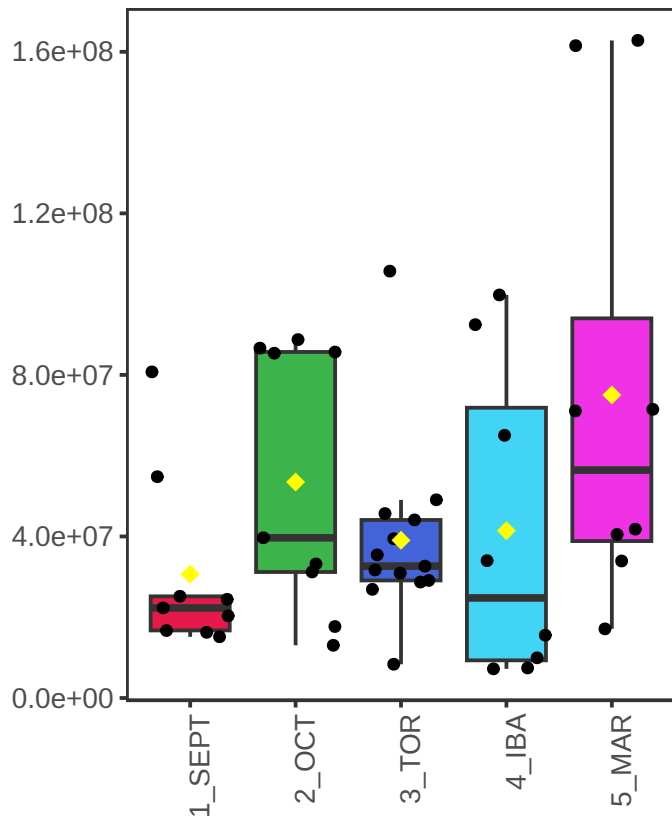

Normalized Conc.

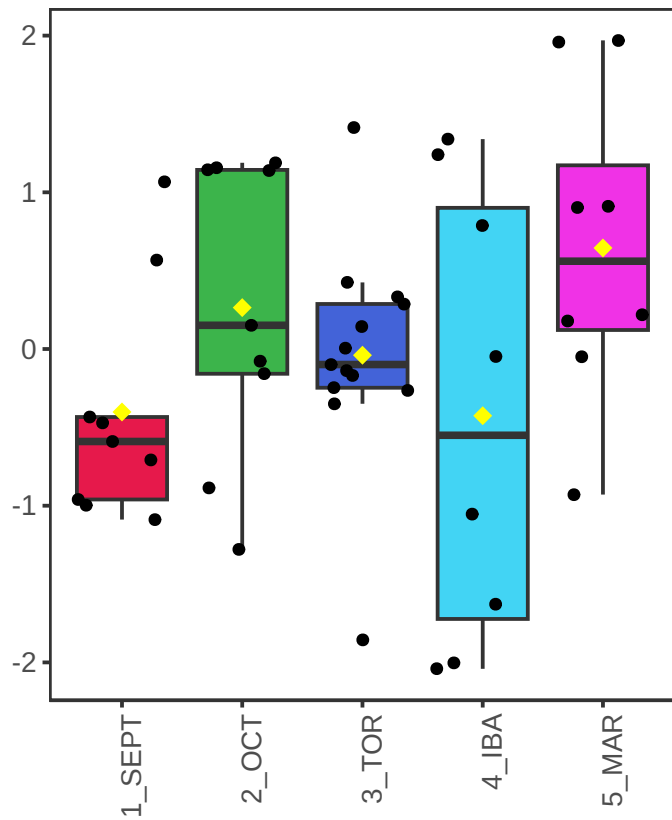



# beta-Hydroxybutyric acid

Original Conc.

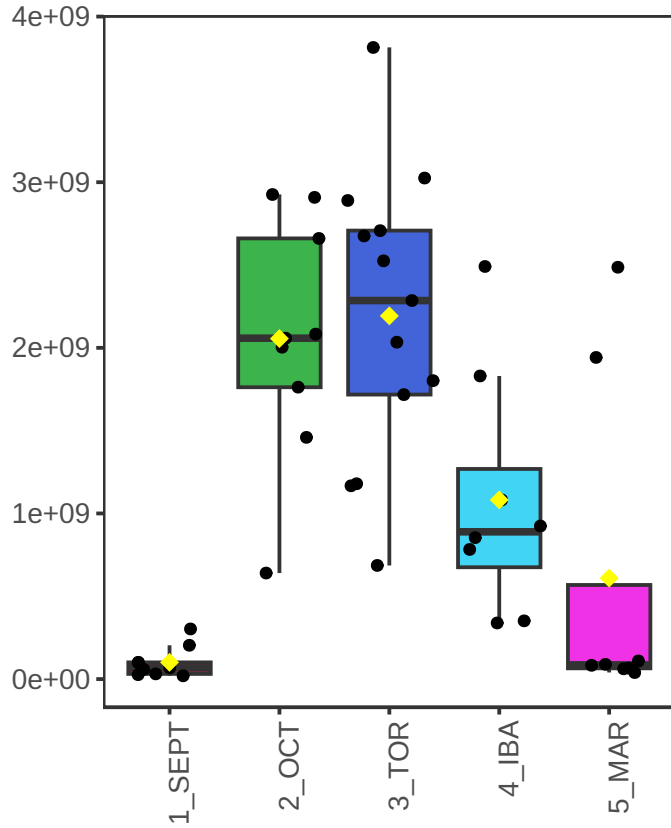

Normalized Conc.

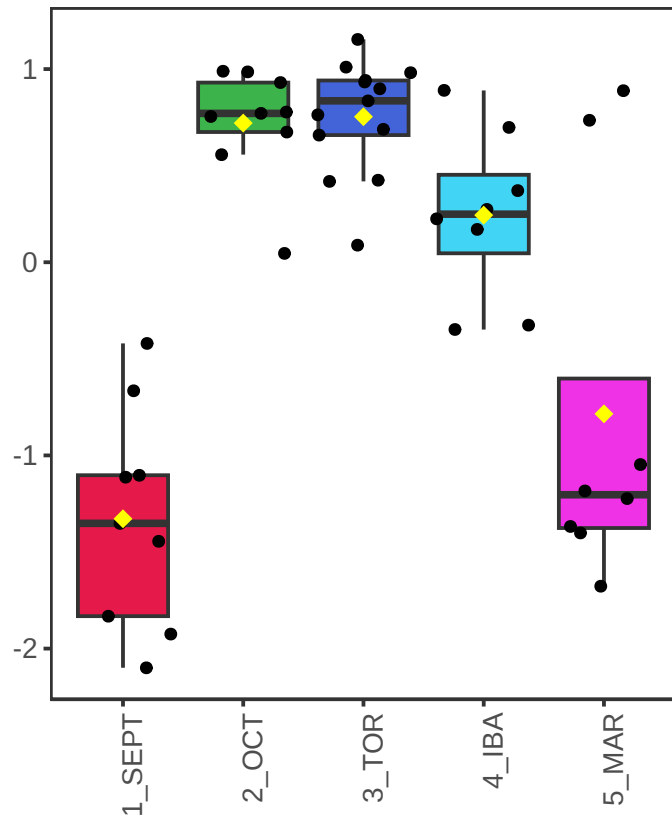

# Benzoic acid

Original Conc.

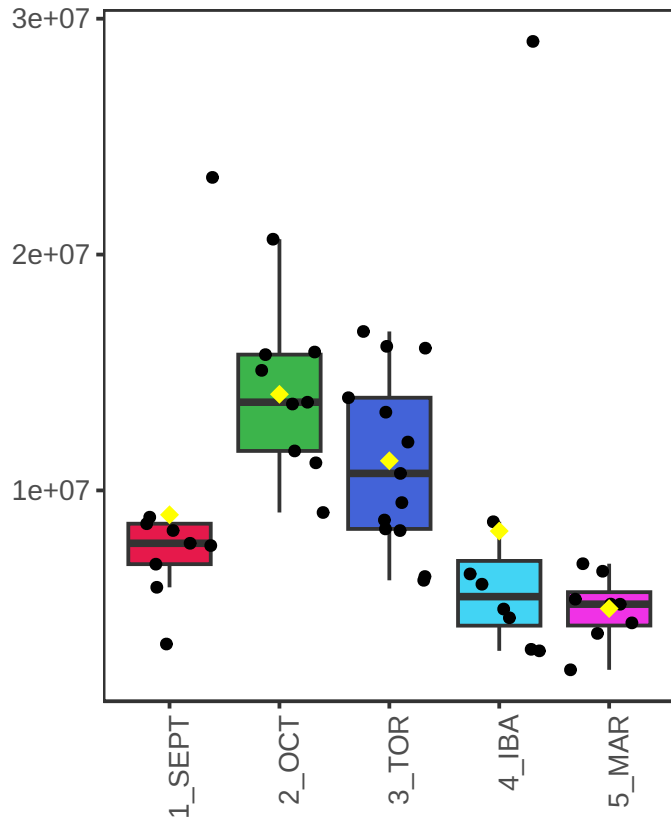

Normalized Conc.

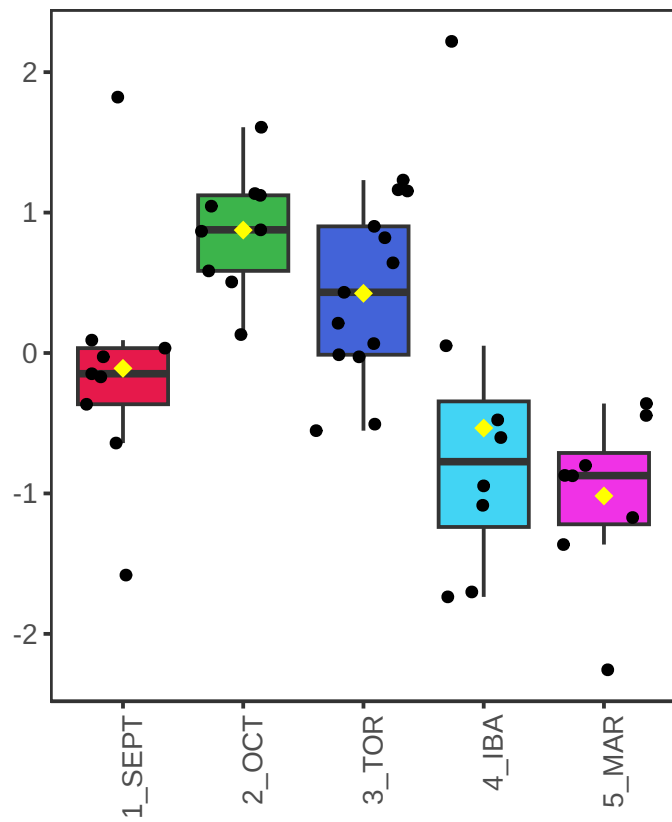

# Caffeic acid

Original Conc.

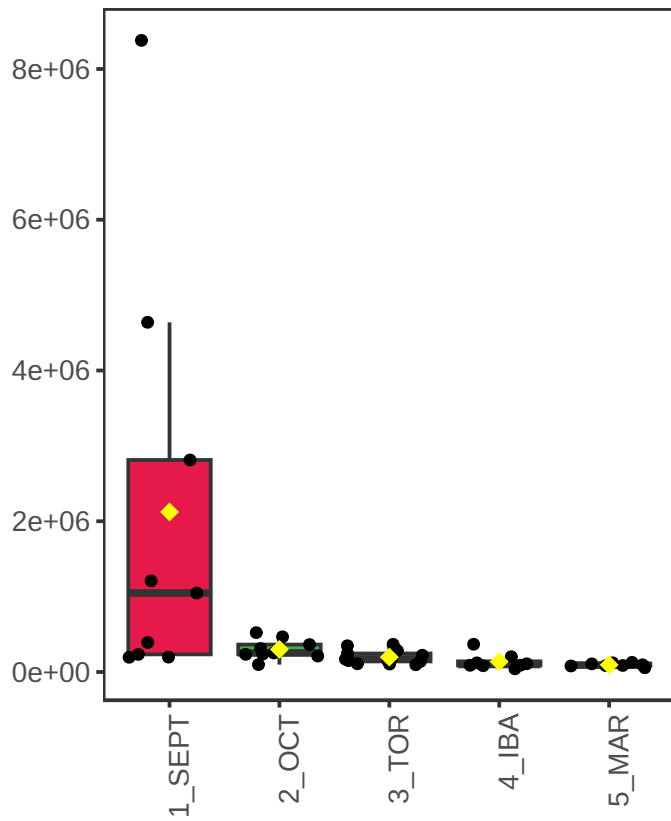

Normalized Conc.

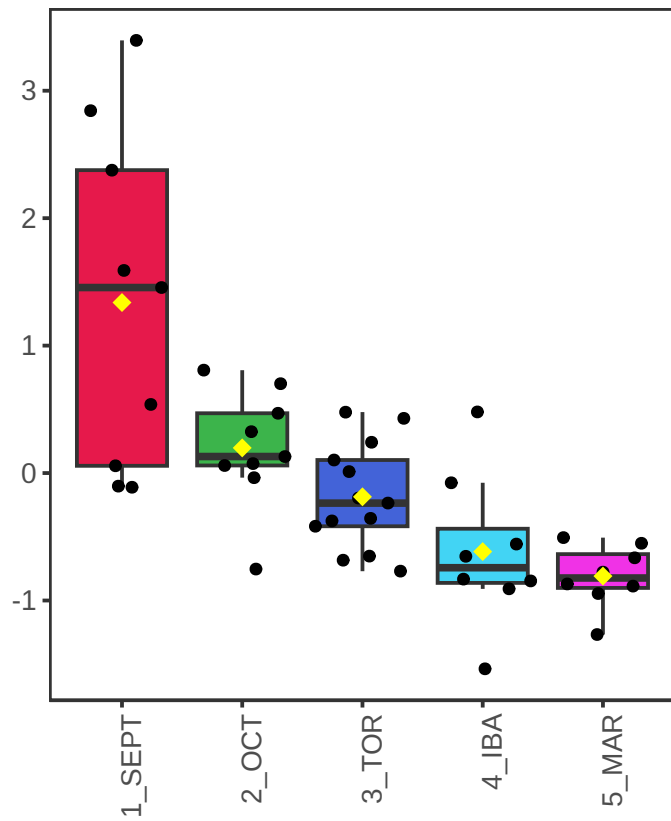

# cis-Acetylacrylic acid

Original Conc.

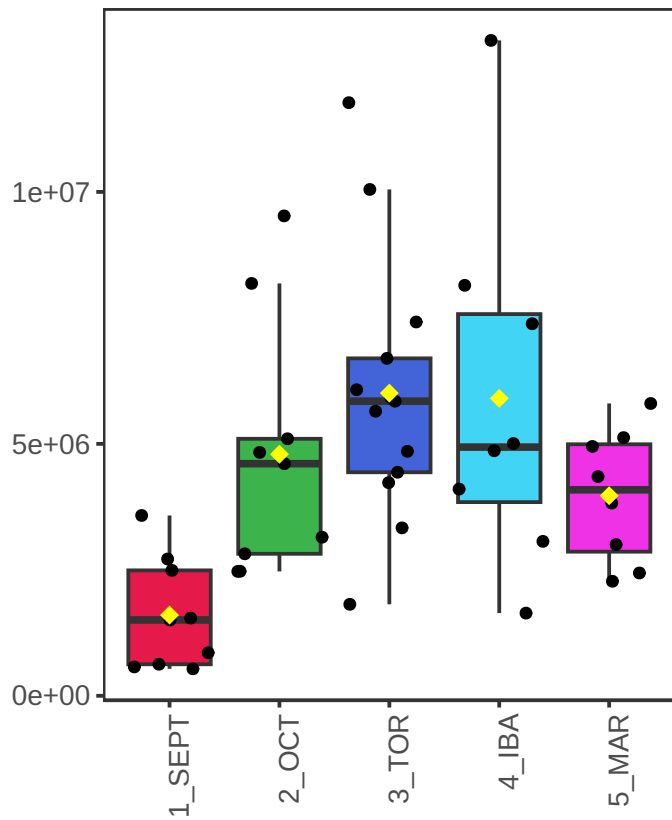

Normalized Conc.

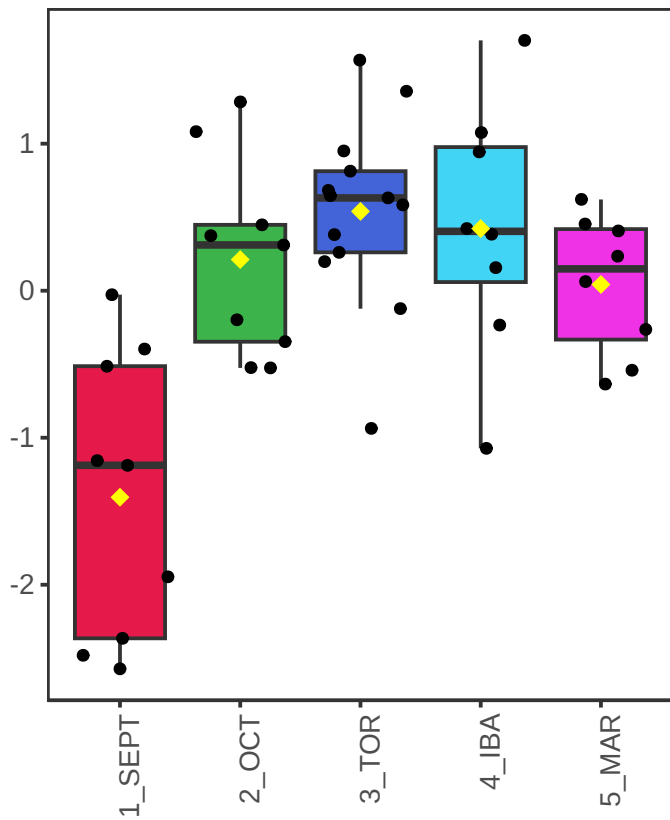

# Creatine

## Original Conc.

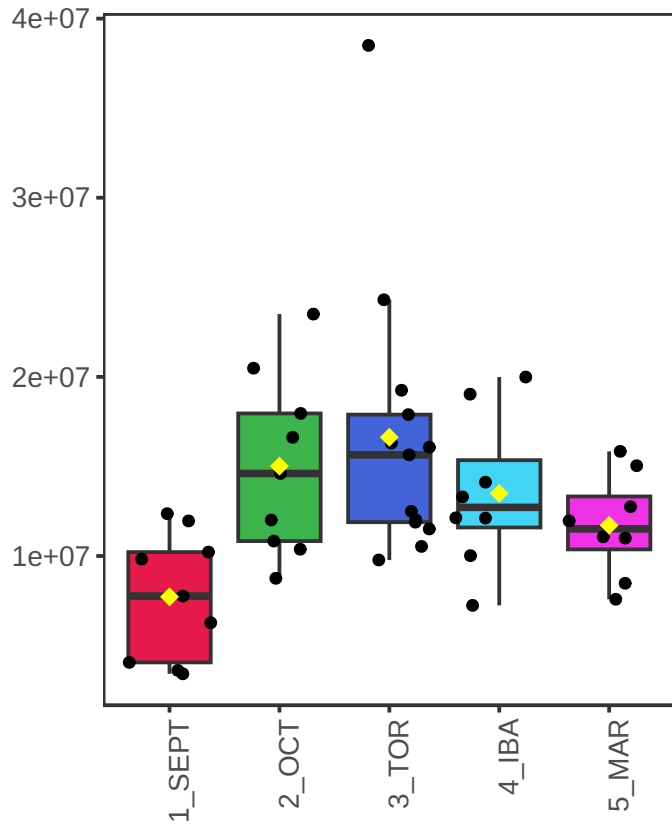

## Normalized Conc.

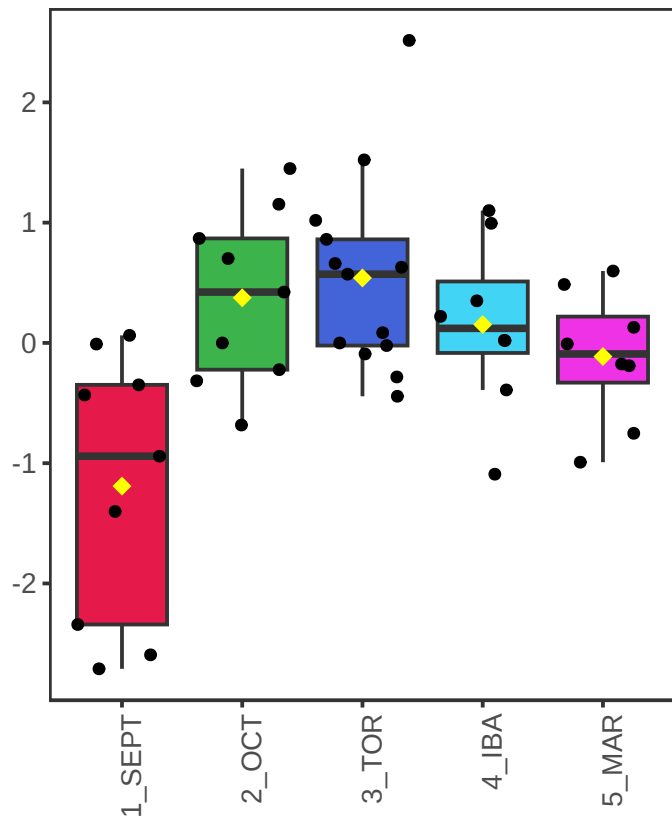

# Cyclo(Seryltyrosyl)

Original Conc.

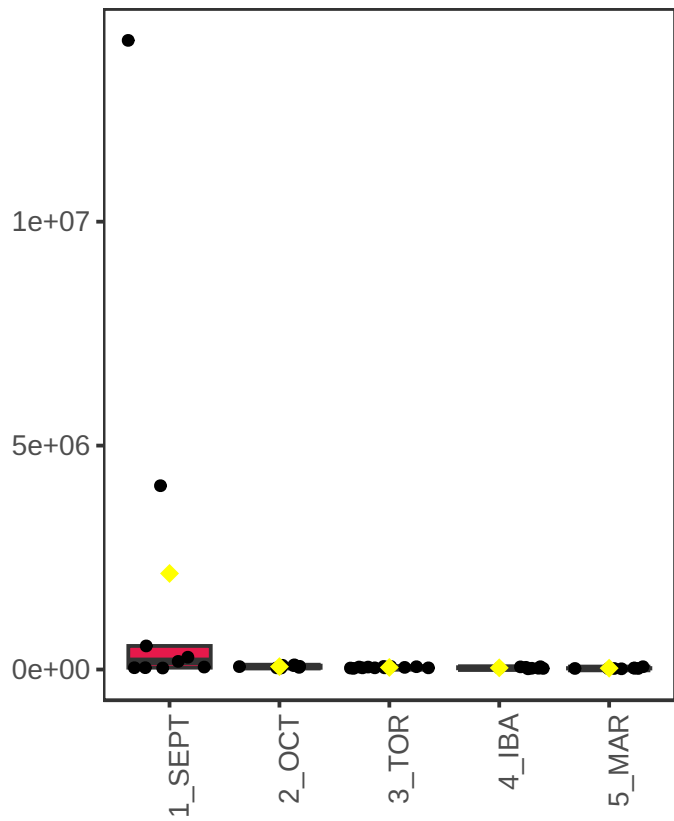

Normalized Conc.

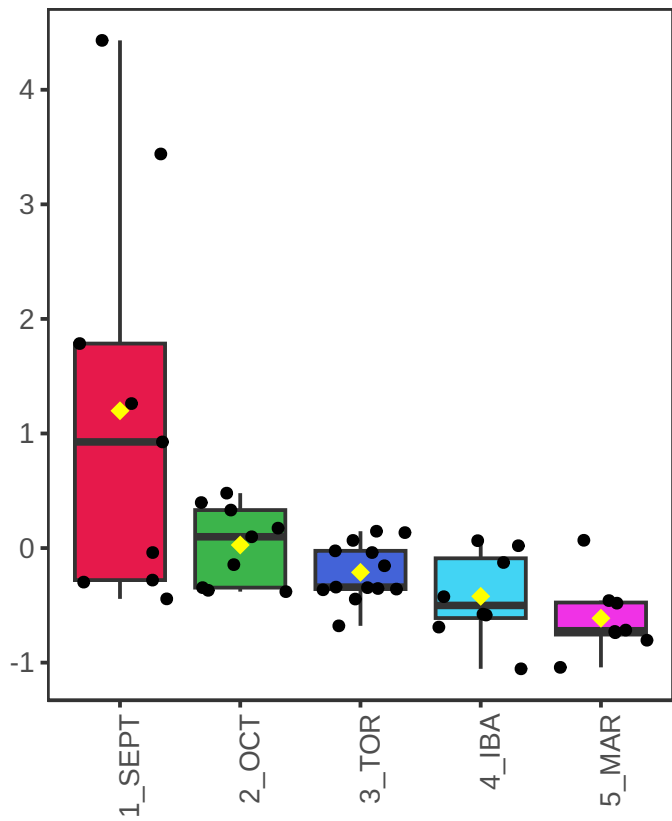

# Dehydroascorbic acid

Original Conc.

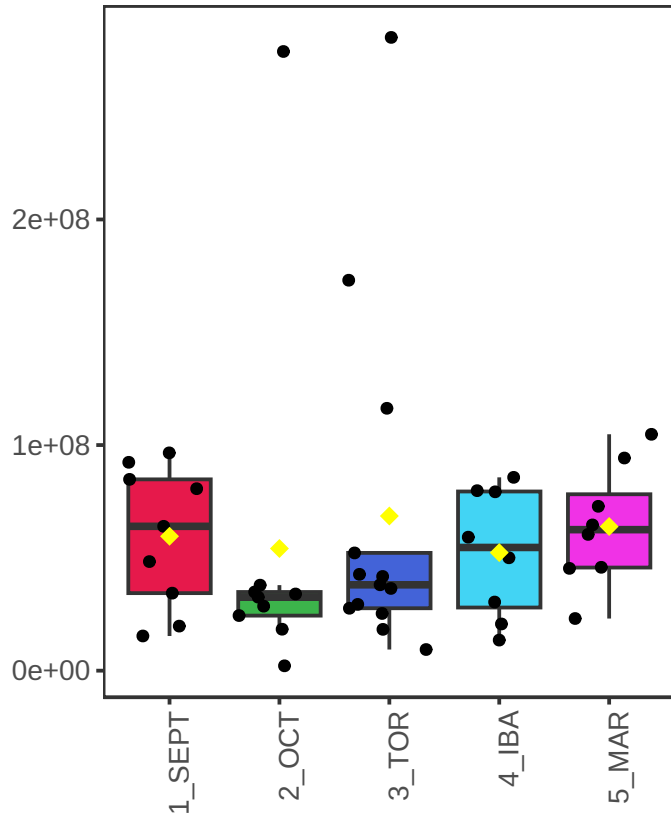

Normalized Conc.

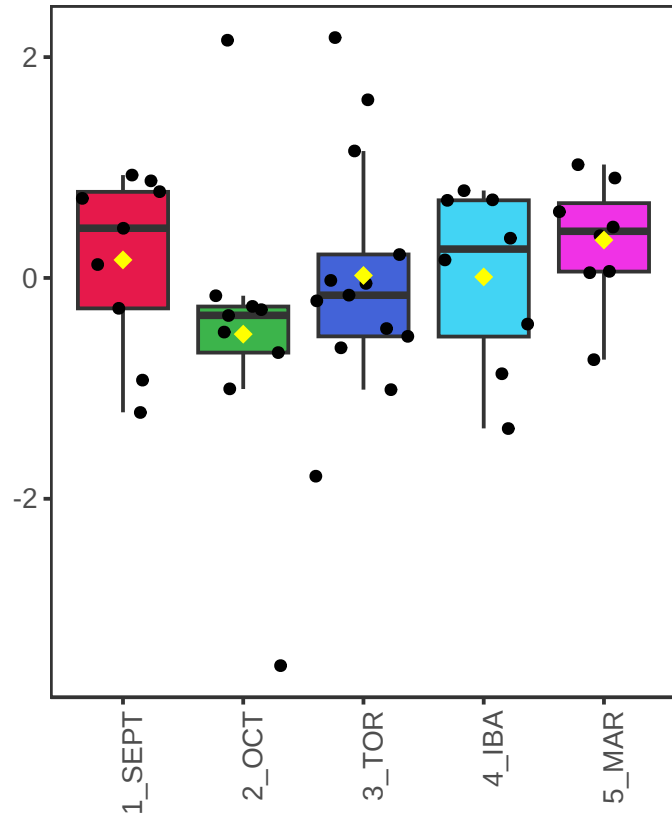

# Ethyl lactate

Original Conc.

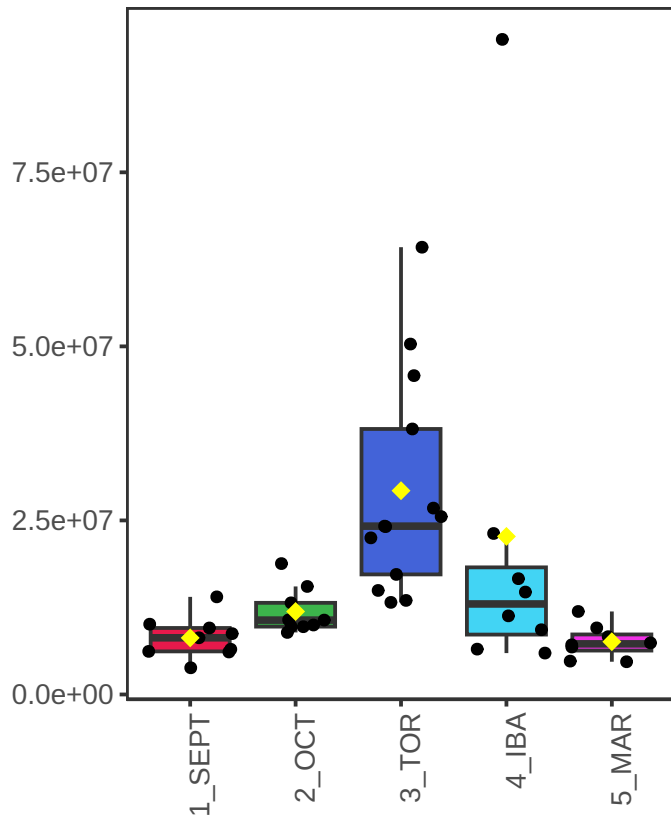

Normalized Conc.

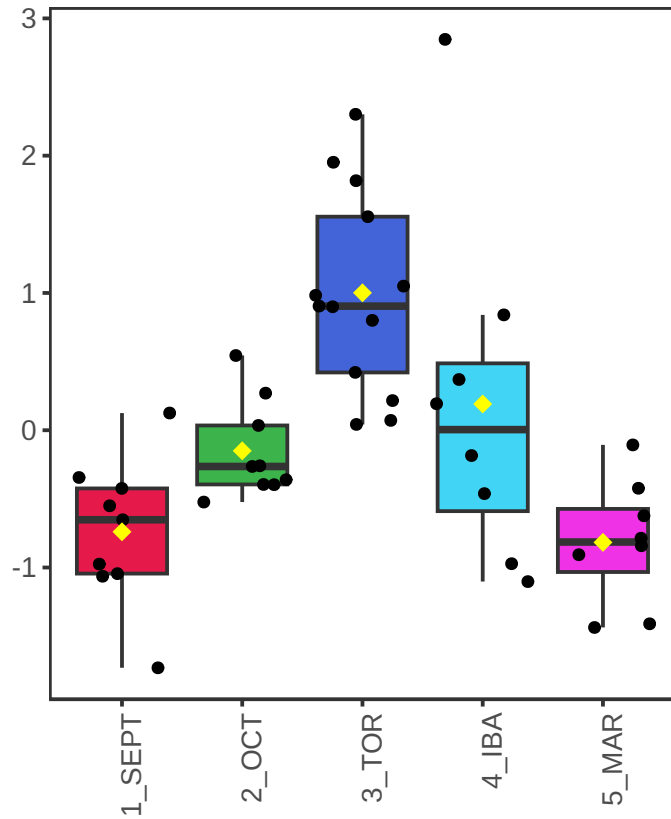



# Gentisic acid

Original Conc.

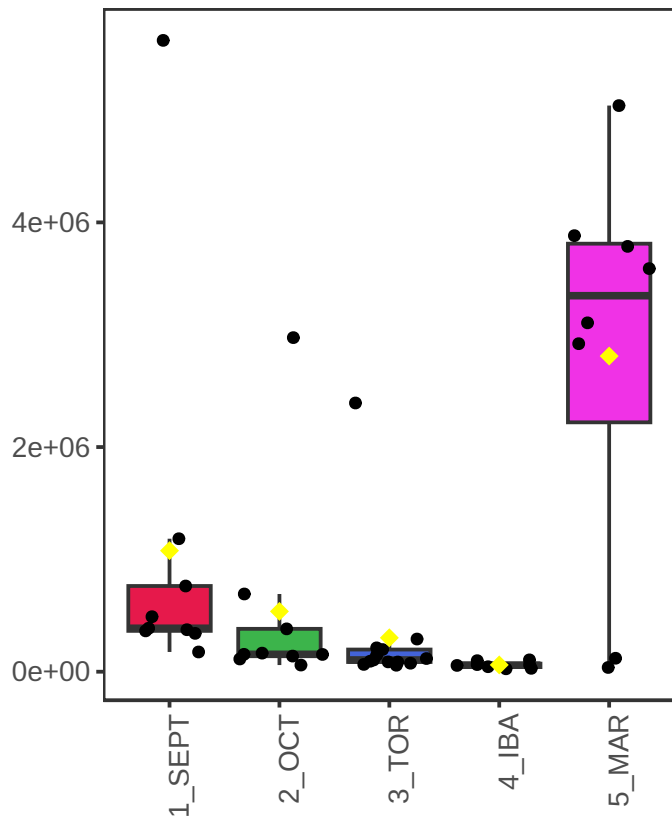

Normalized Conc.

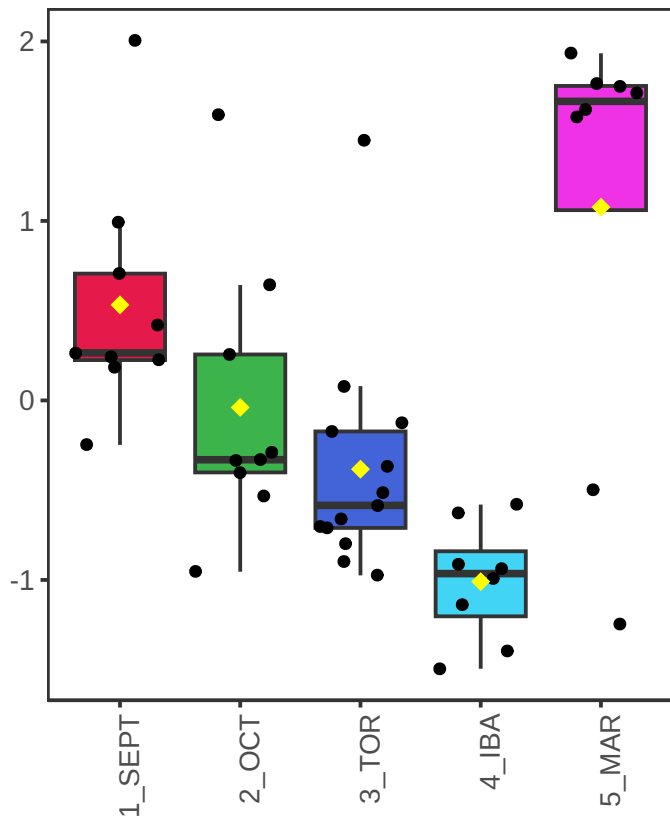

# Gluconic acid

Original Conc.

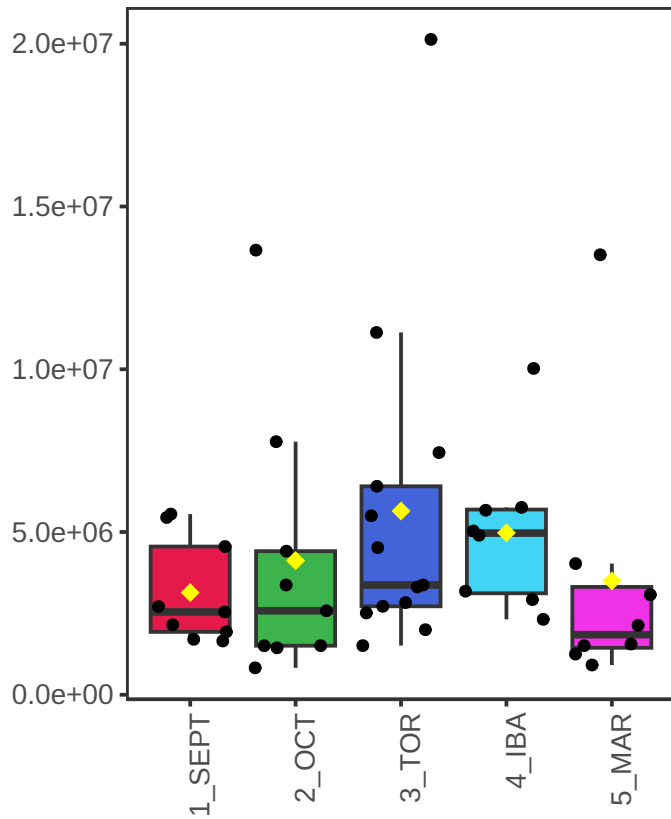

Normalized Conc.

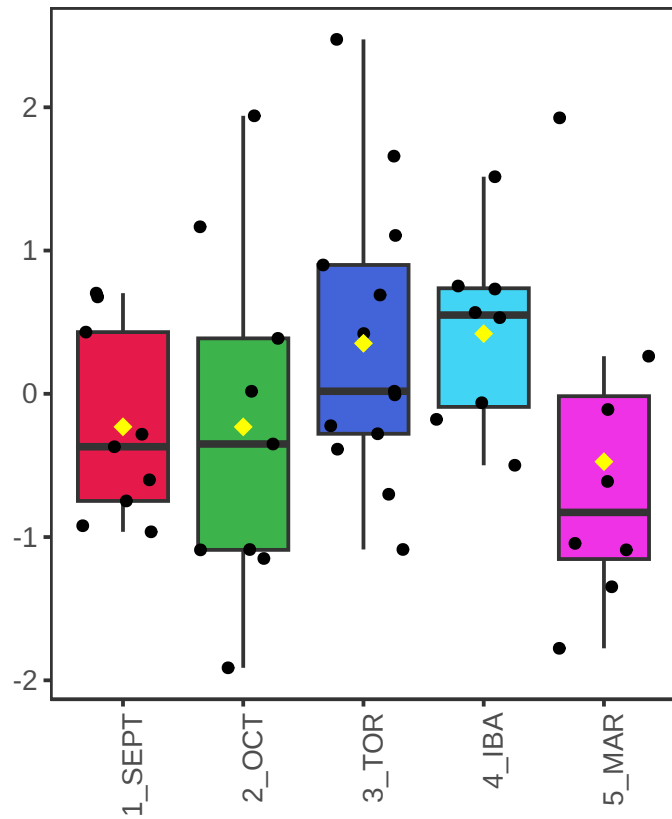

# Glucose

## Original Conc.

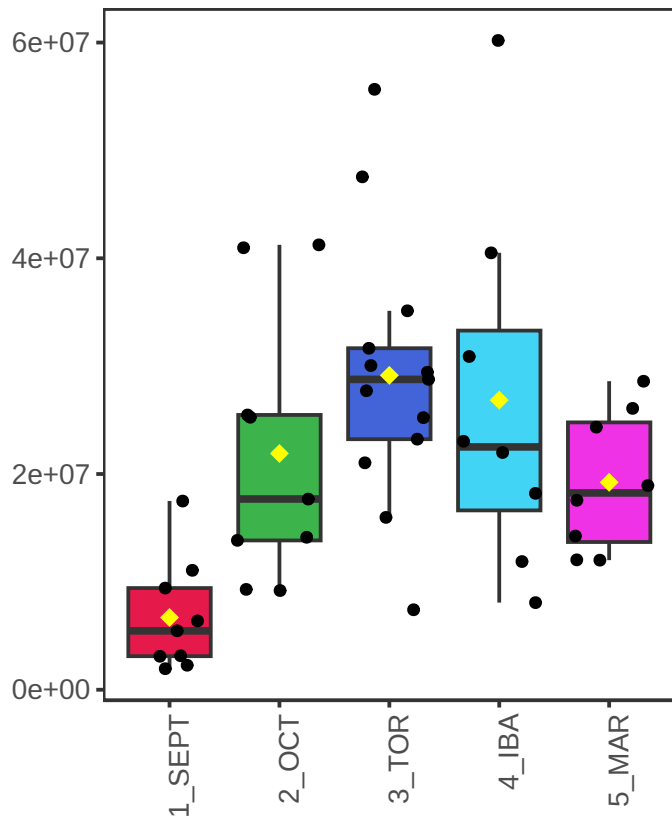

## Normalized Conc.

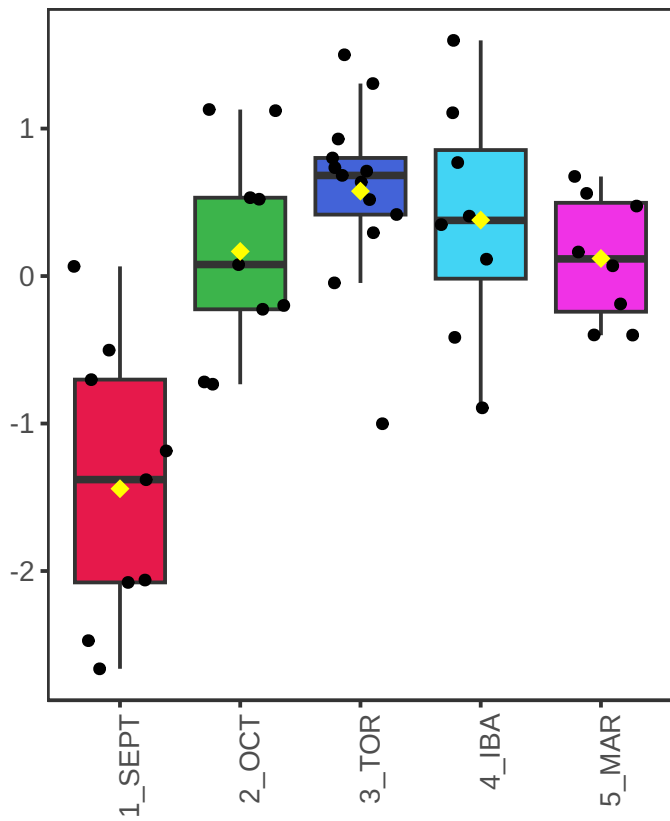

# Glutamic acid

Original Conc.

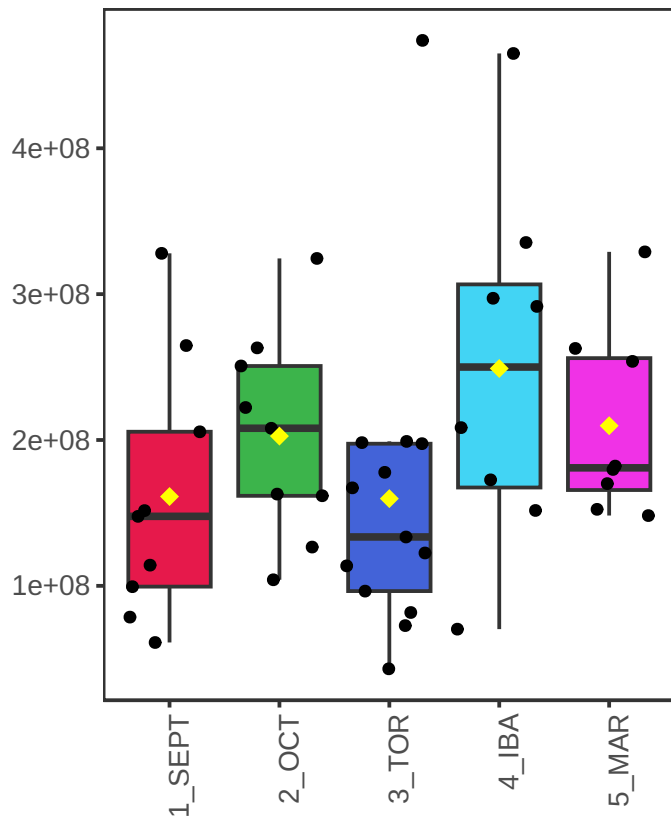

Normalized Conc.

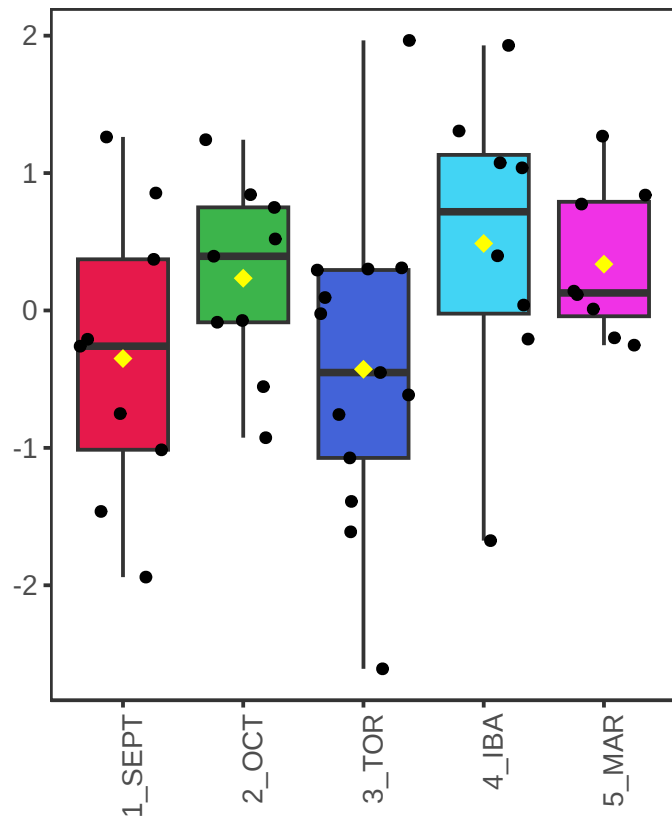

# Glutamine

Original Conc.

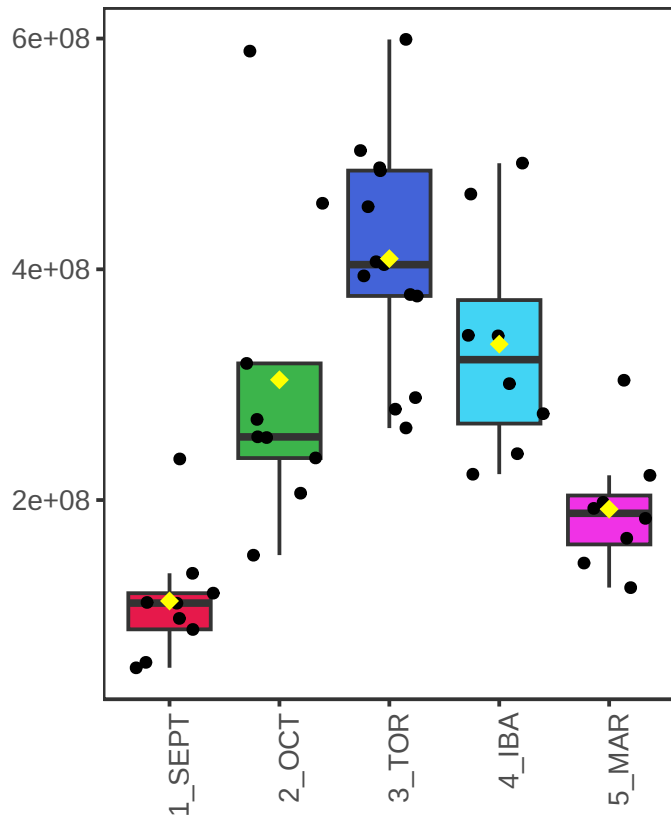

Normalized Conc.

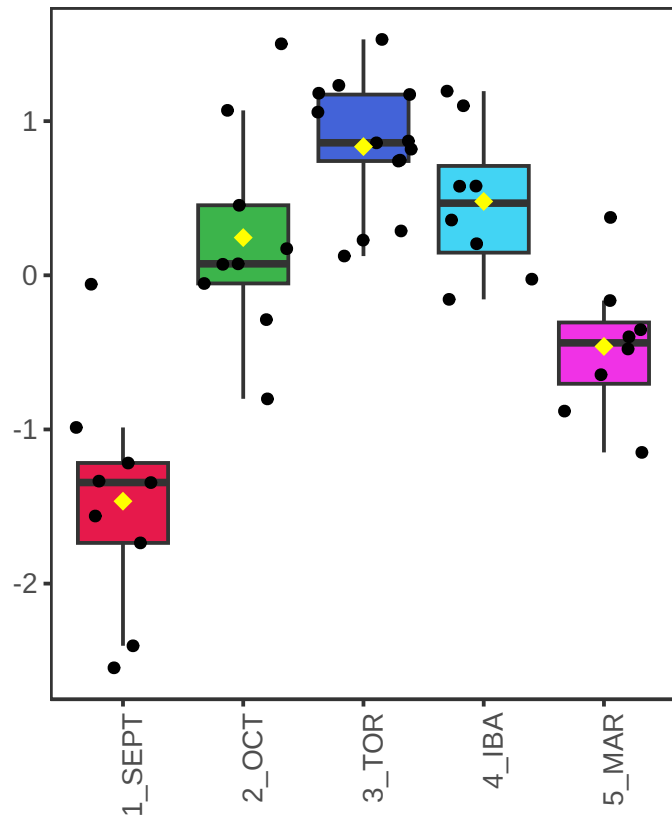

# Glutaric acid

Original Conc.

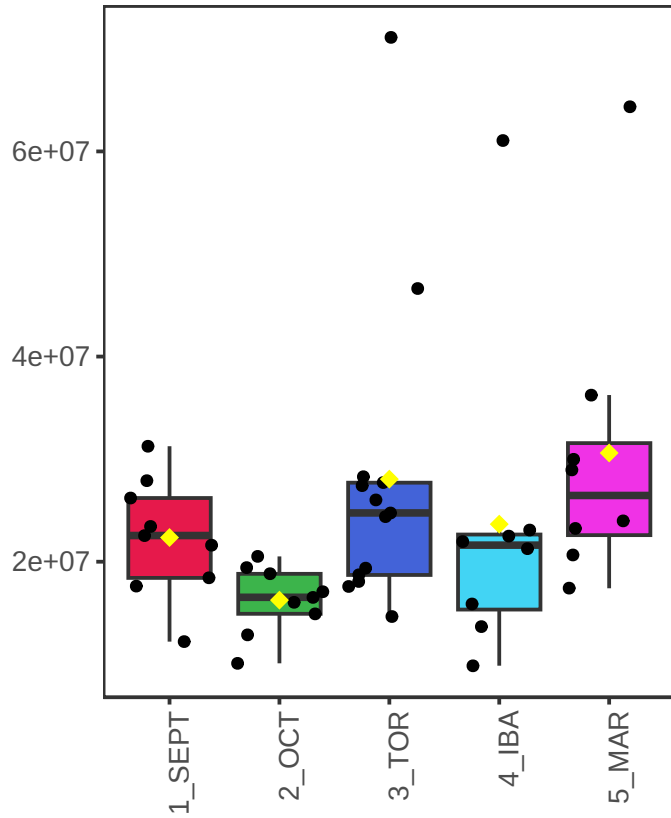

Normalized Conc.

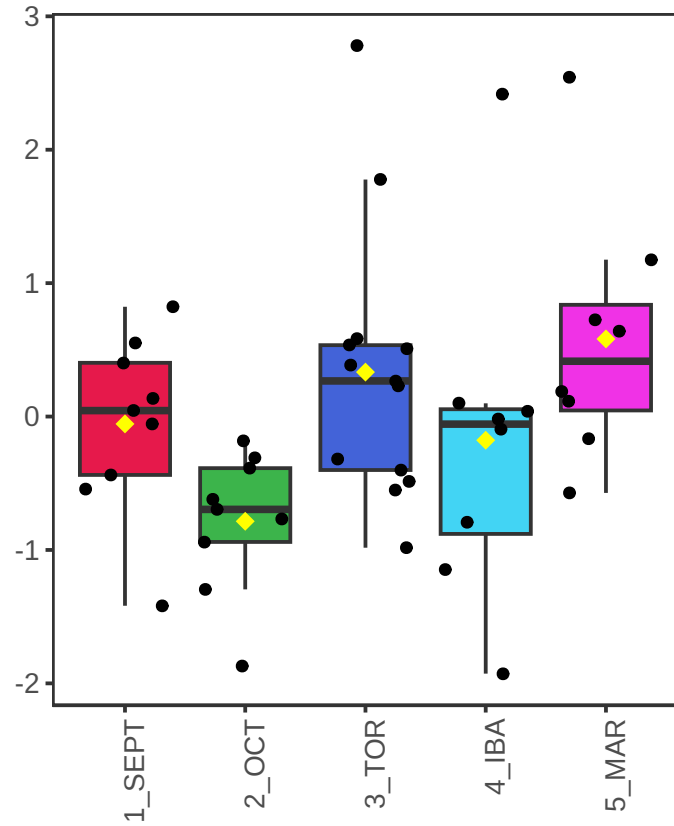

# Glutathione

Original Conc.

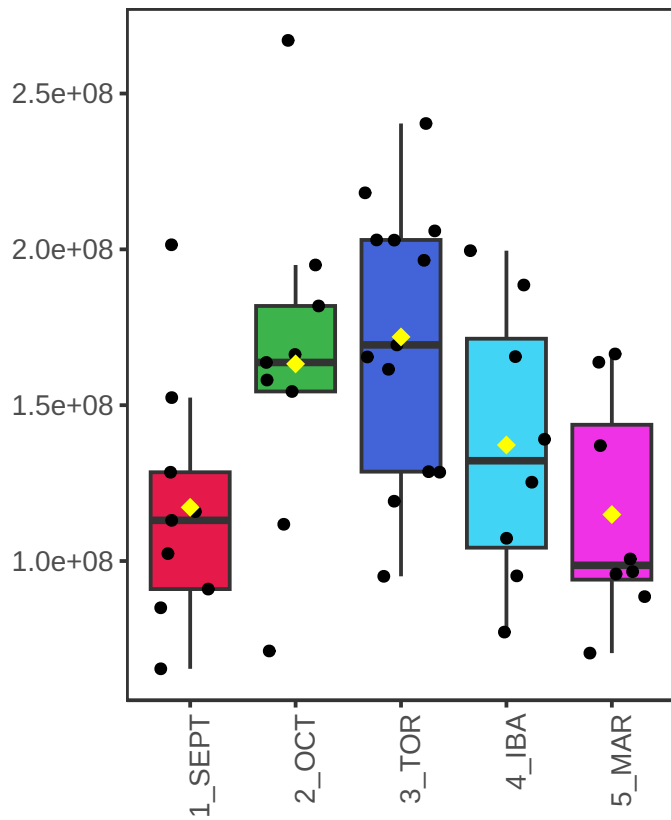

Normalized Conc.

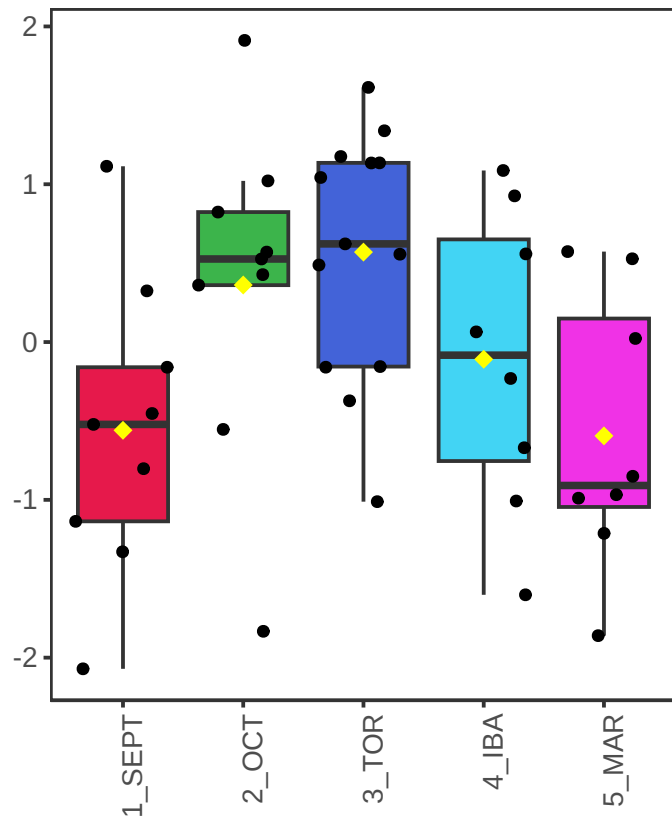

# Glycerol 3-phosphate

Original Conc.

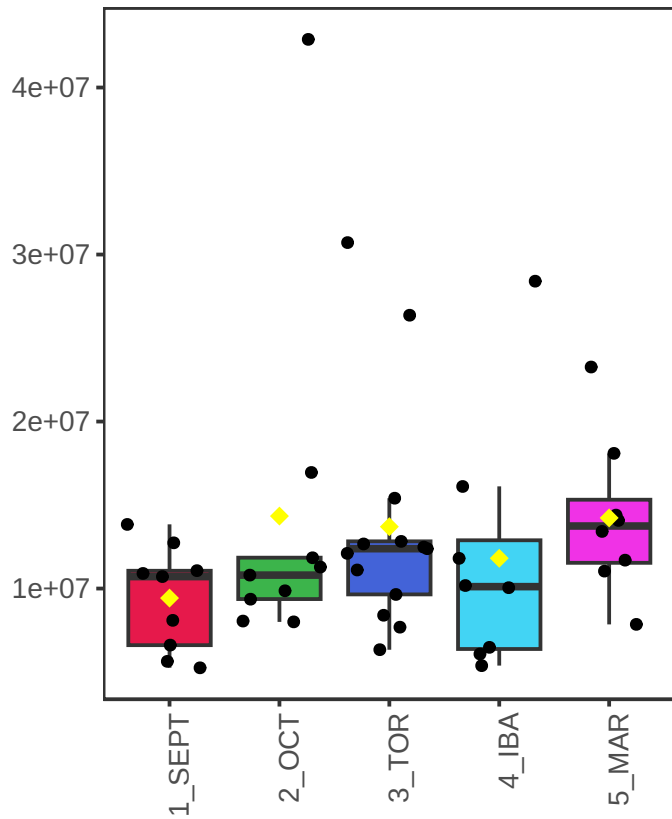

Normalized Conc.

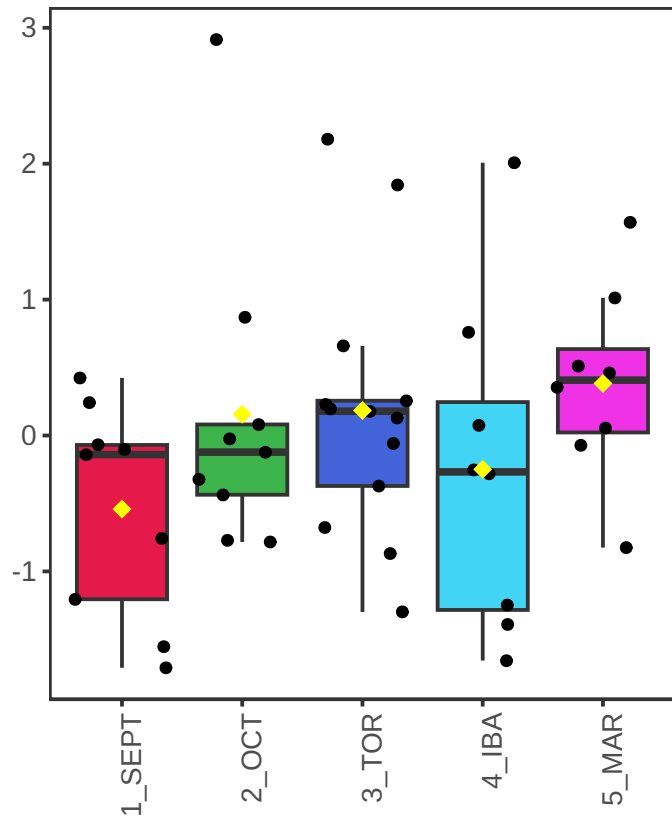



# Glycerophosphoglycerol

Original Conc.

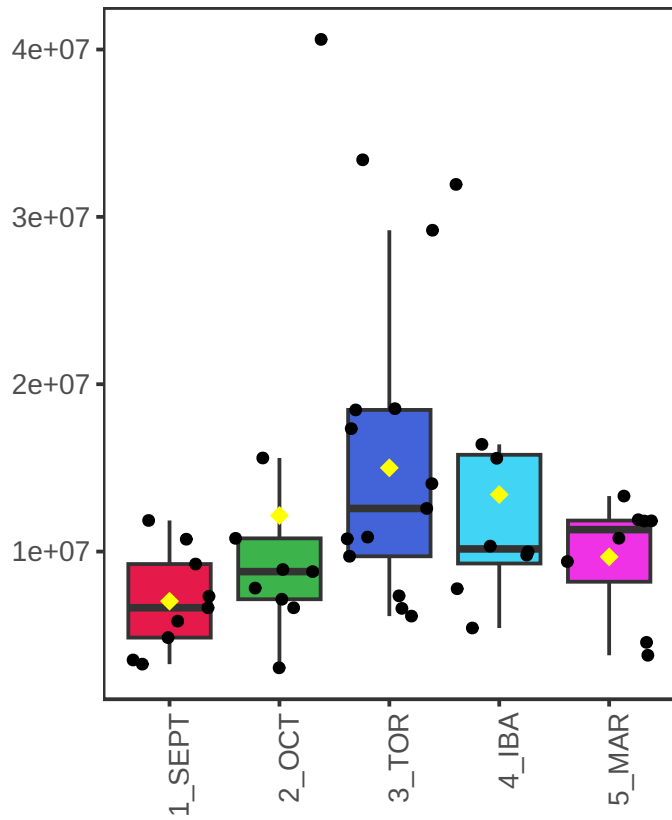

Normalized Conc.

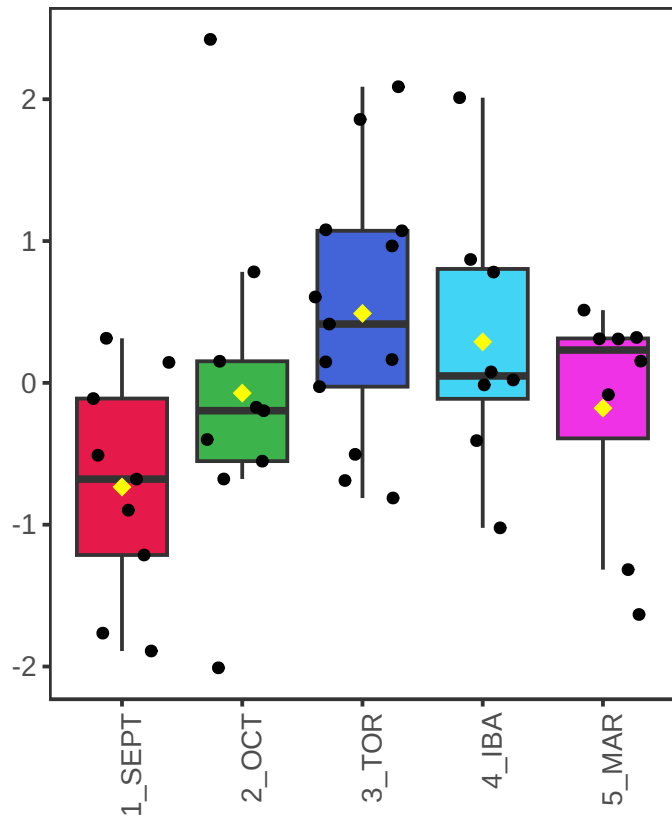

# Glycerolphosphorylethanolamine

Original Conc.

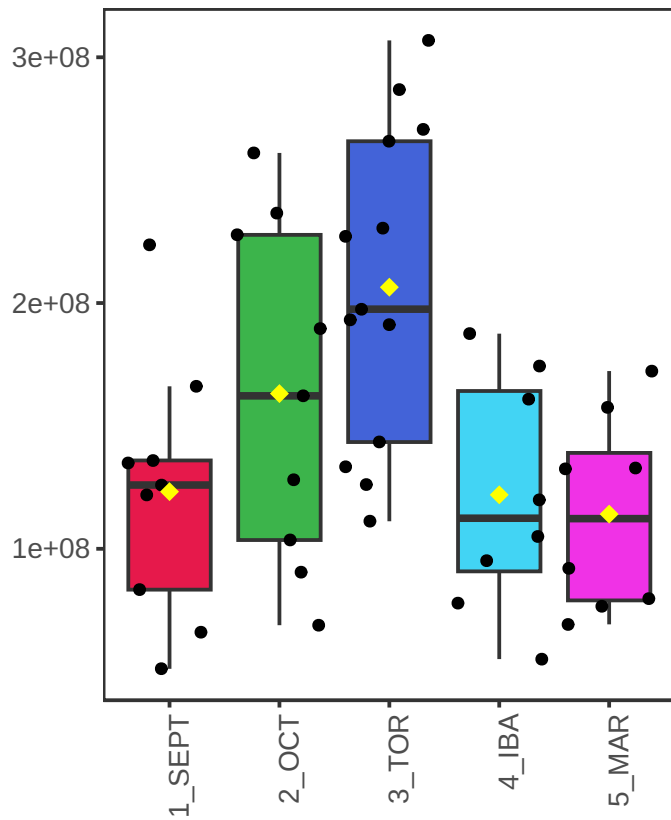

Normalized Conc.

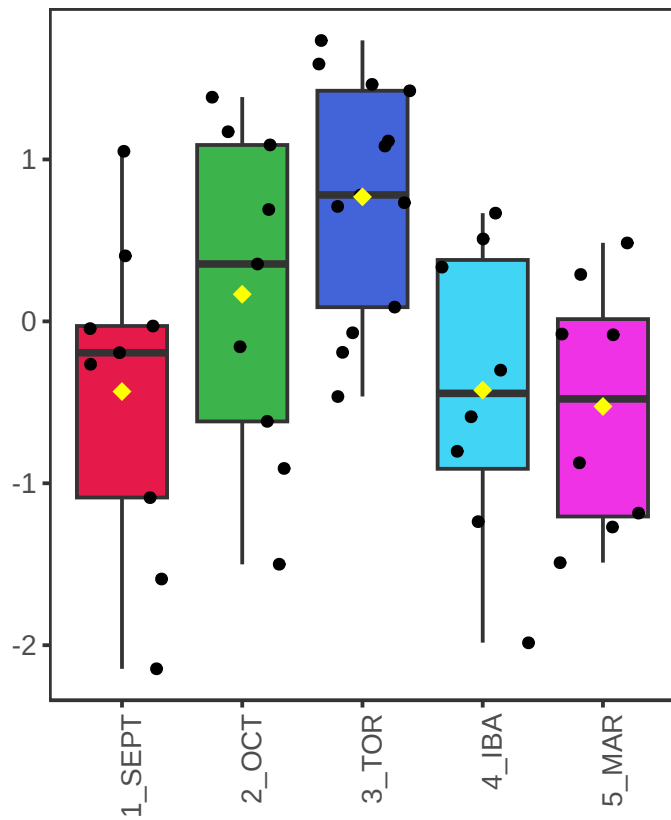

# Glycine

Original Conc.

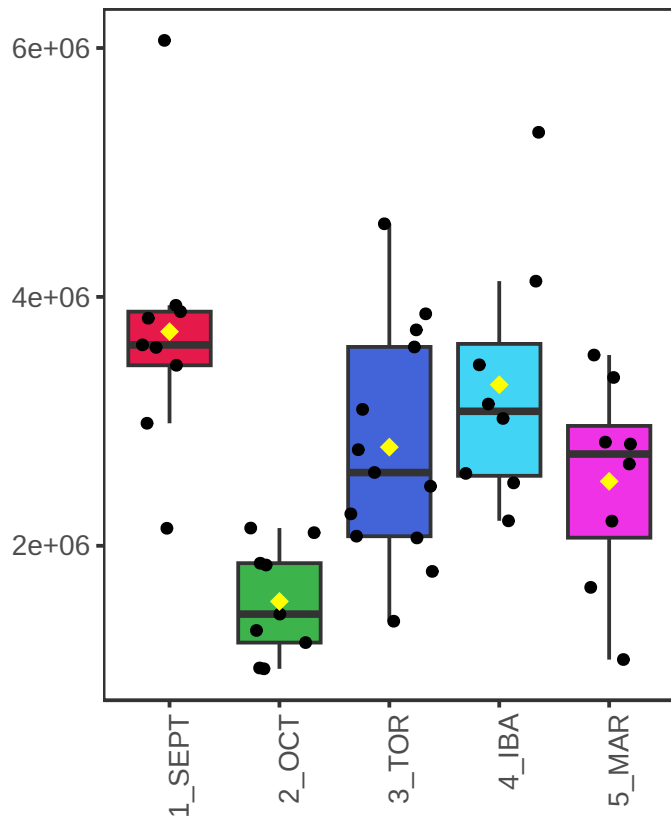

Normalized Conc.

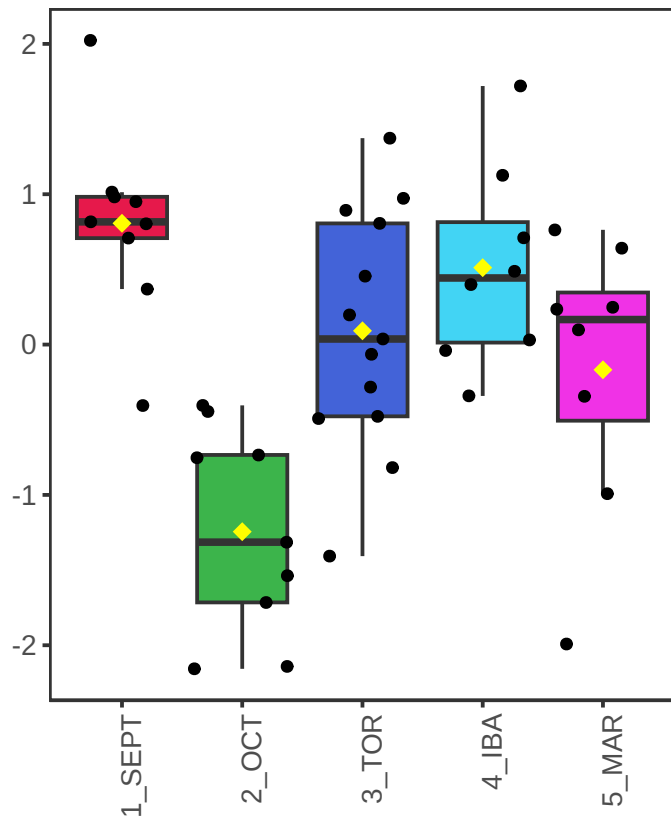

# Guanine

Original Conc.

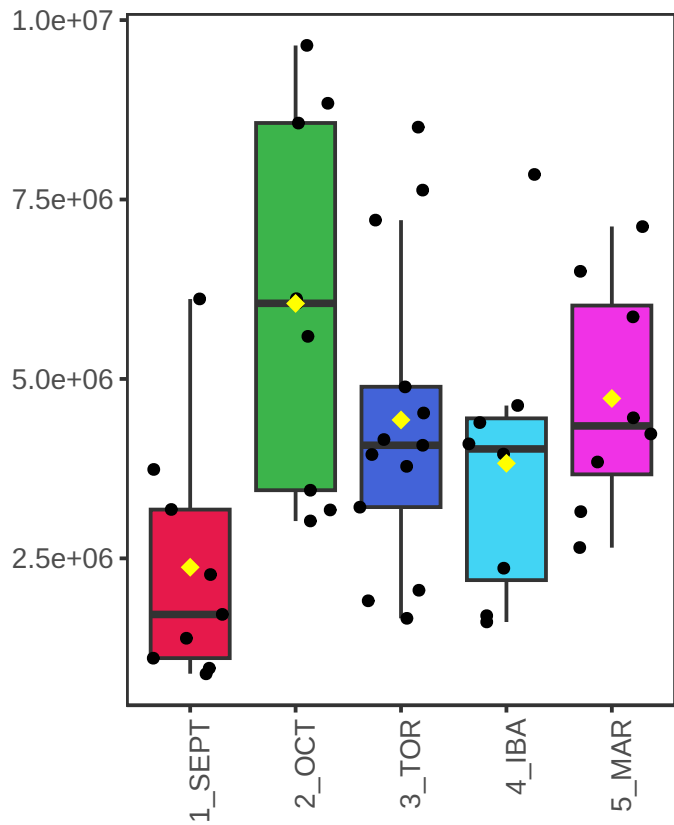

Normalized Conc.

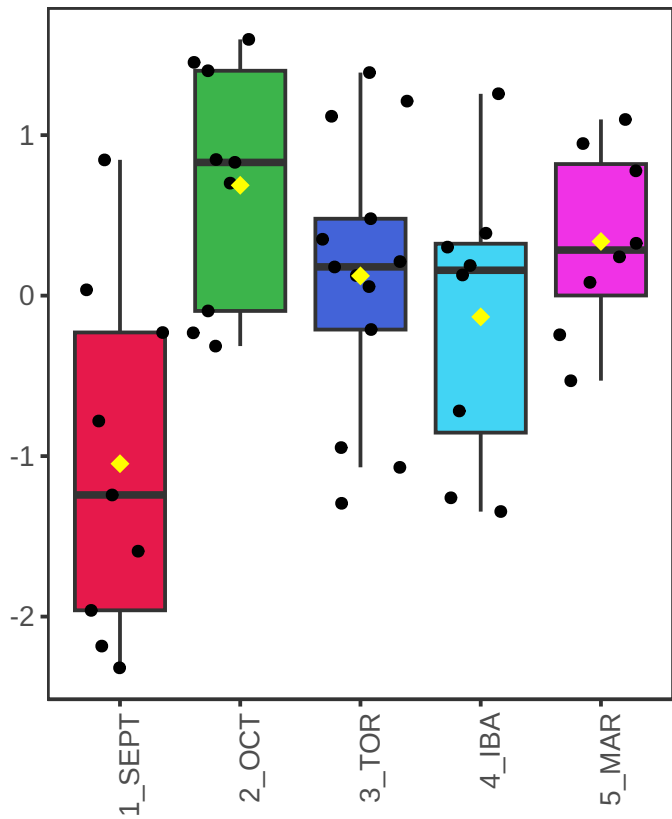

# Guanosine

Original Conc.

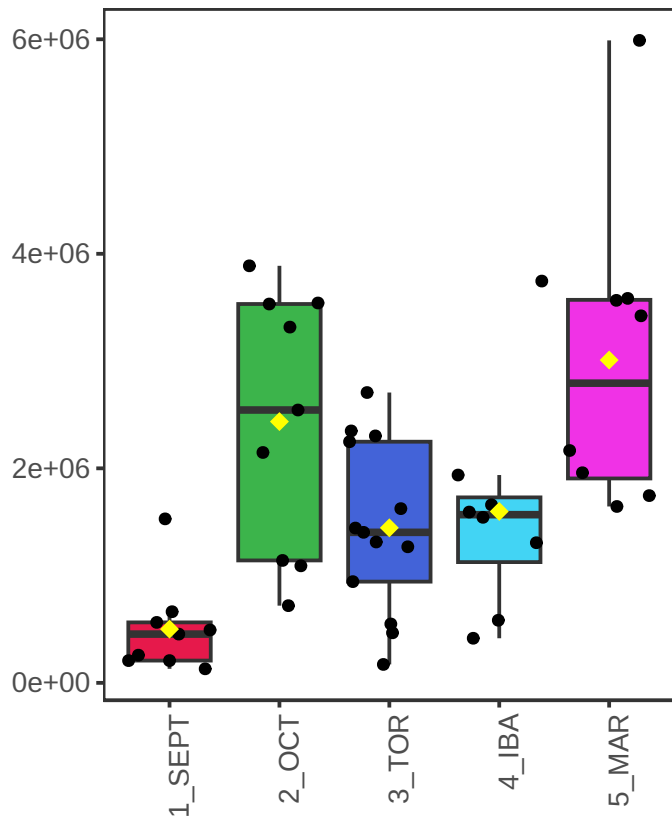

Normalized Conc.

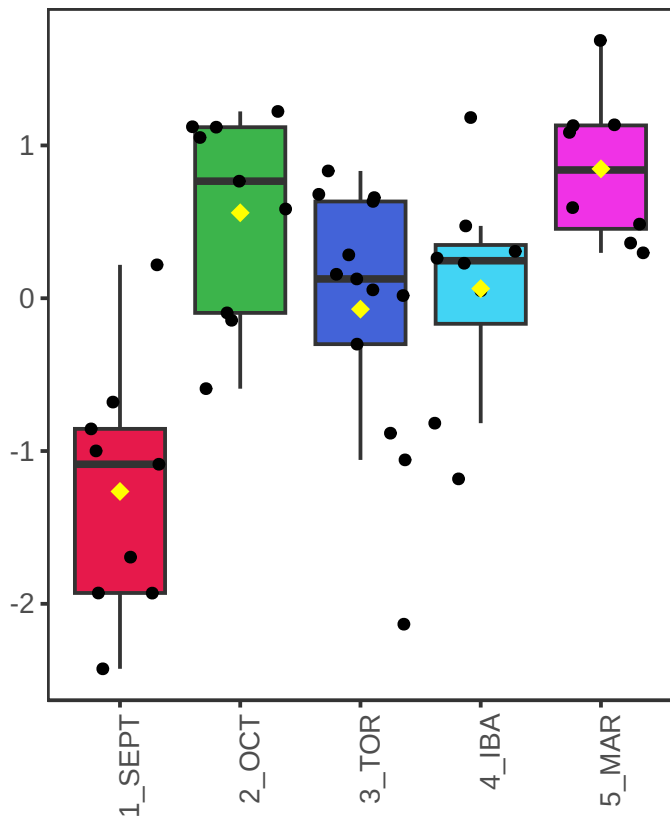

# Hypotaurine

Original Conc.

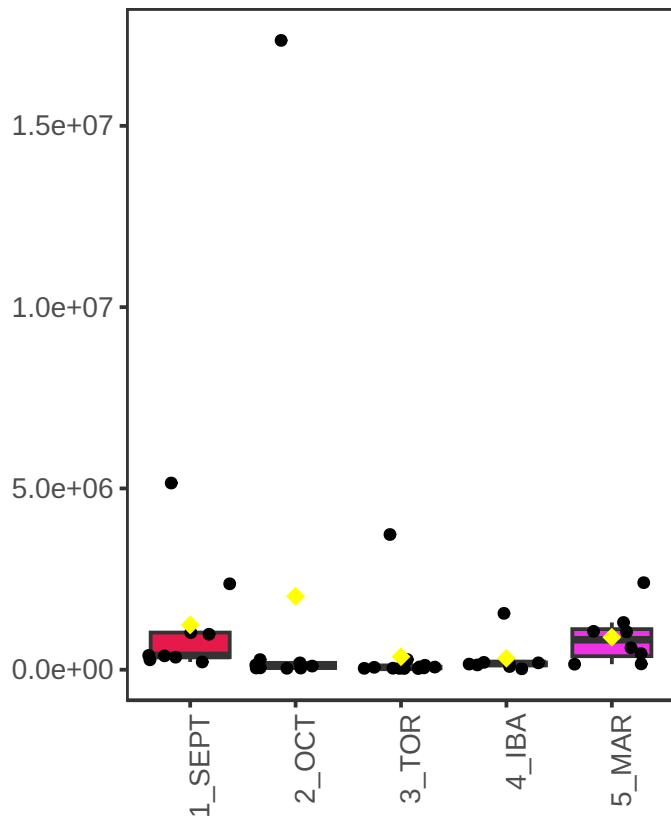

Normalized Conc.

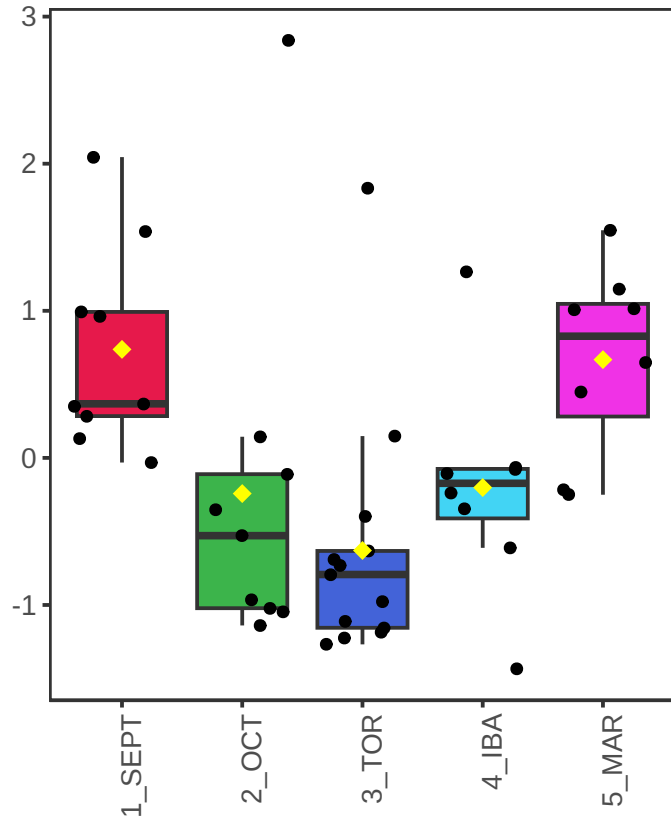

# Indoxyl sulfate

Original Conc.

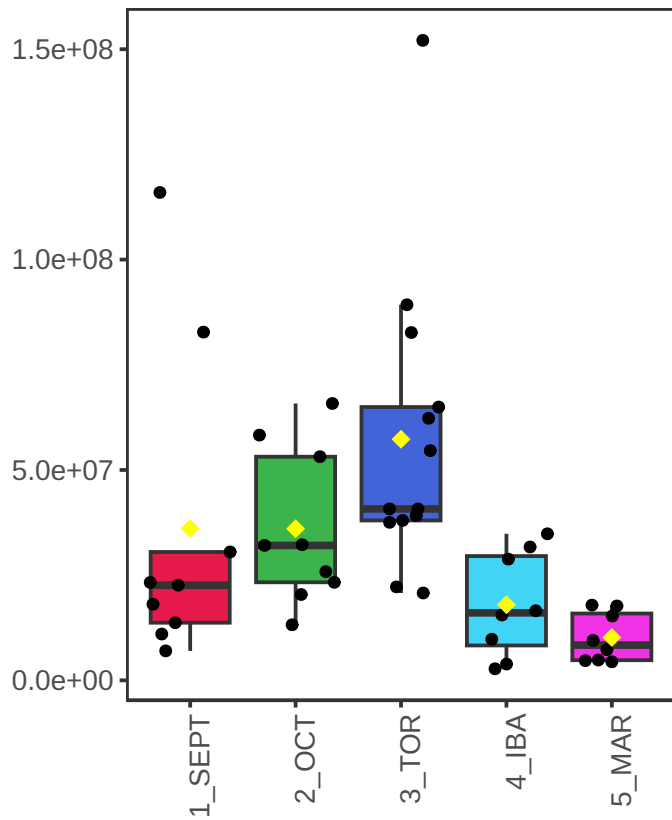

Normalized Conc.

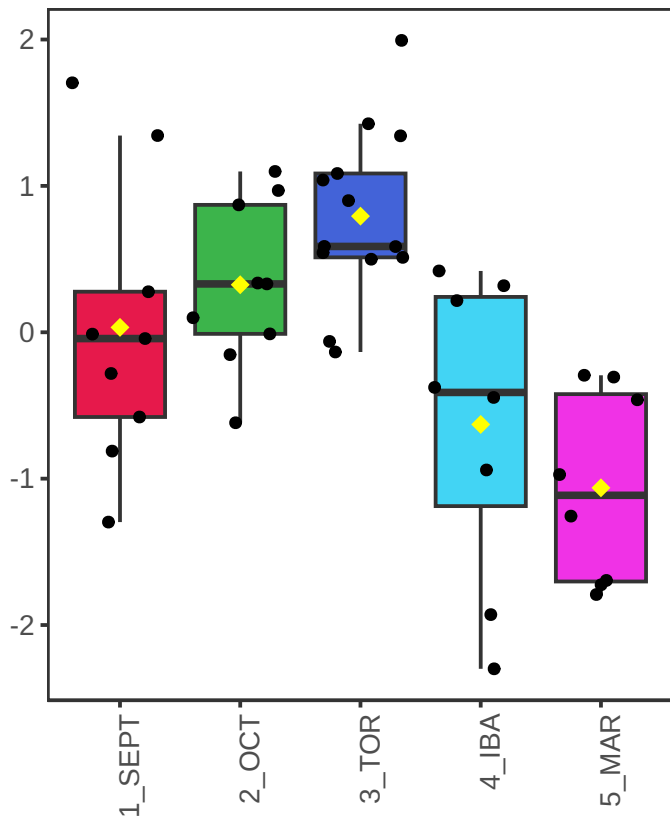

# Inosine-5'-monophosphate (IMP)

Original Conc.

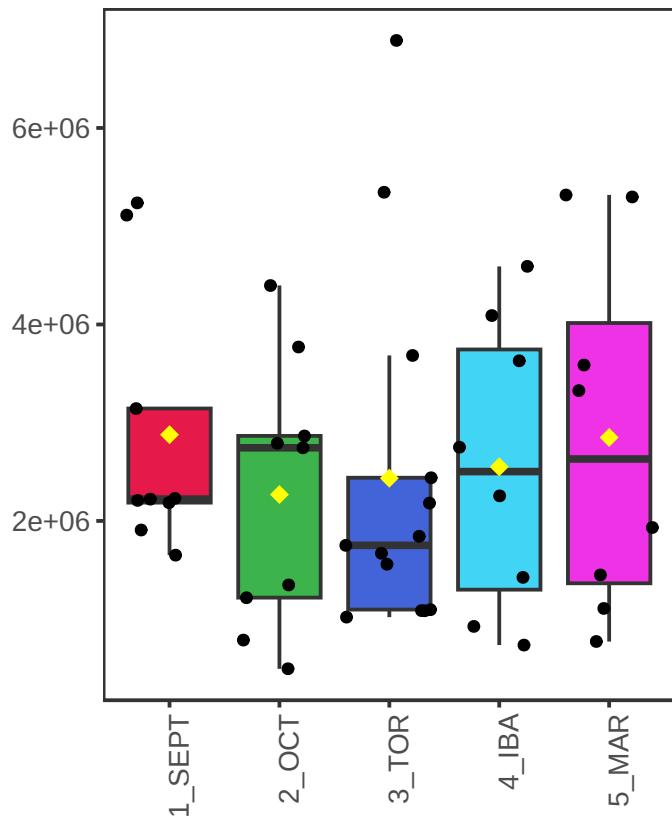

Normalized Conc.

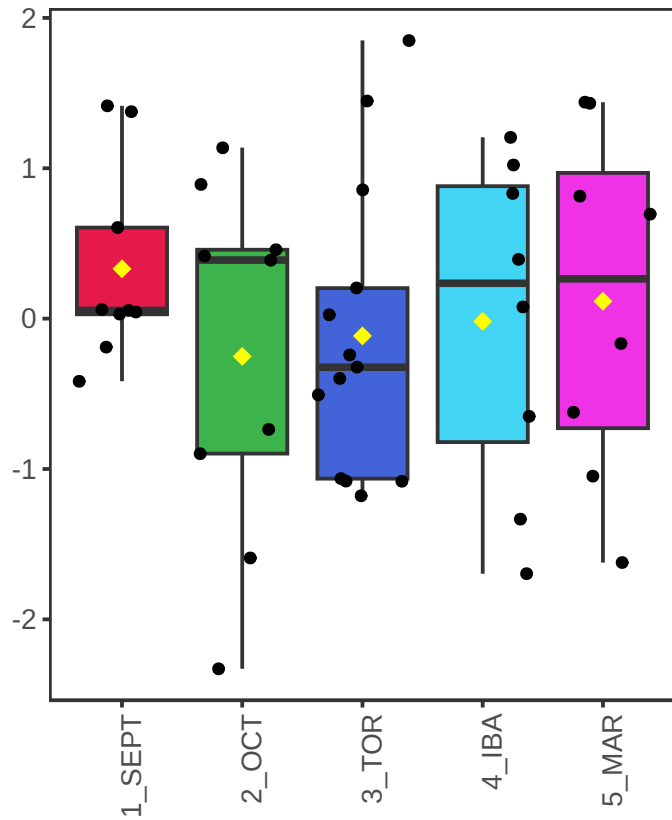



# Inositol

## Original Conc.

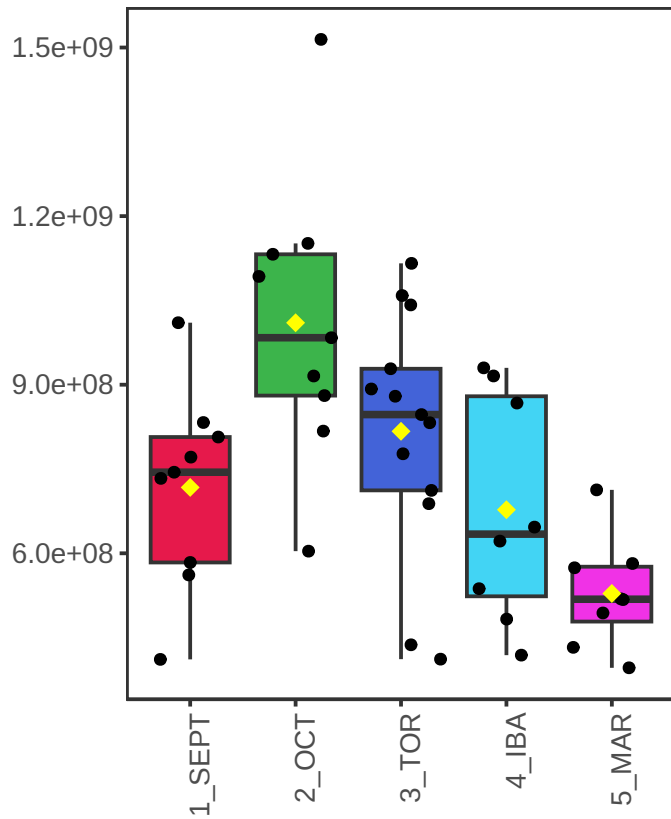

## Normalized Conc.

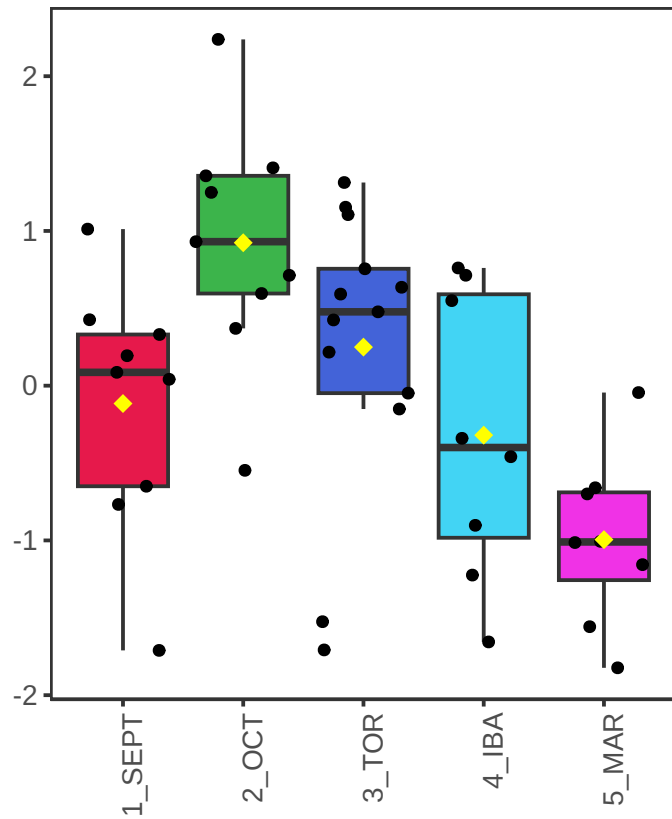

# Isethionic acid

Original Conc.

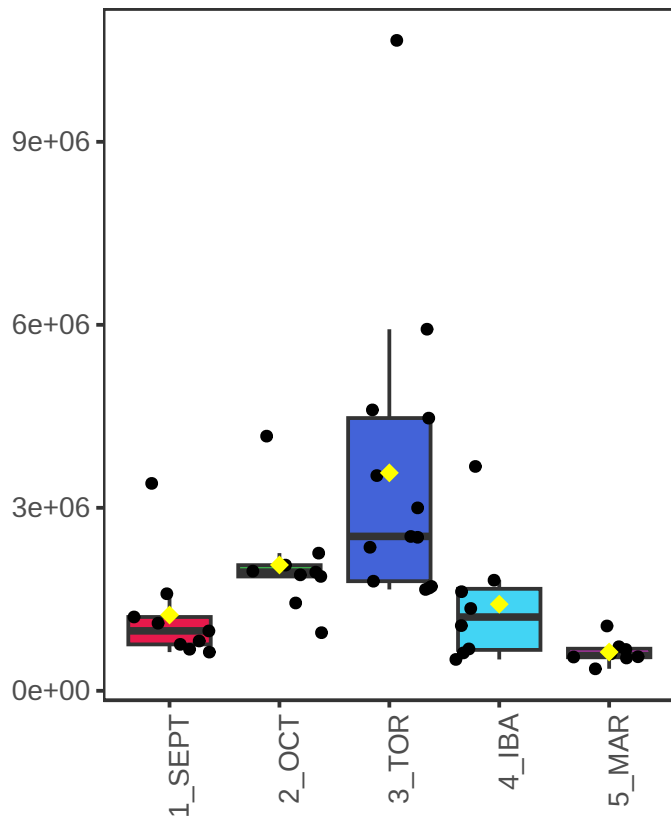

Normalized Conc.

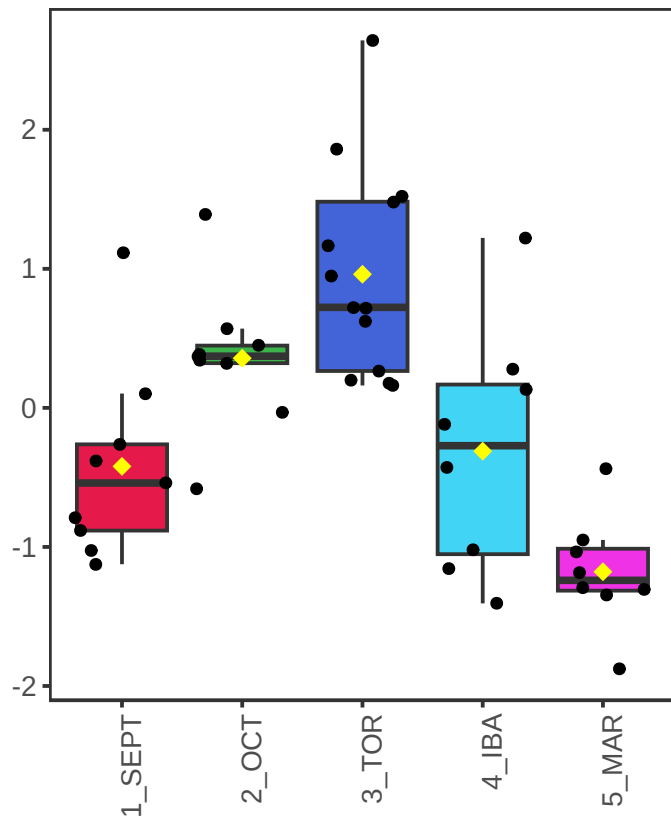

# Itaconic acid

Original Conc.

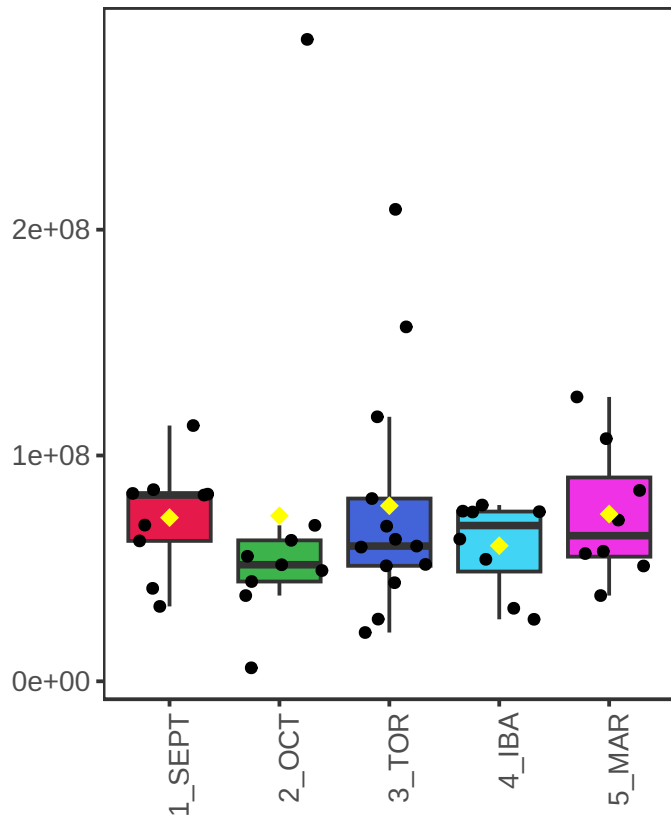

Normalized Conc.

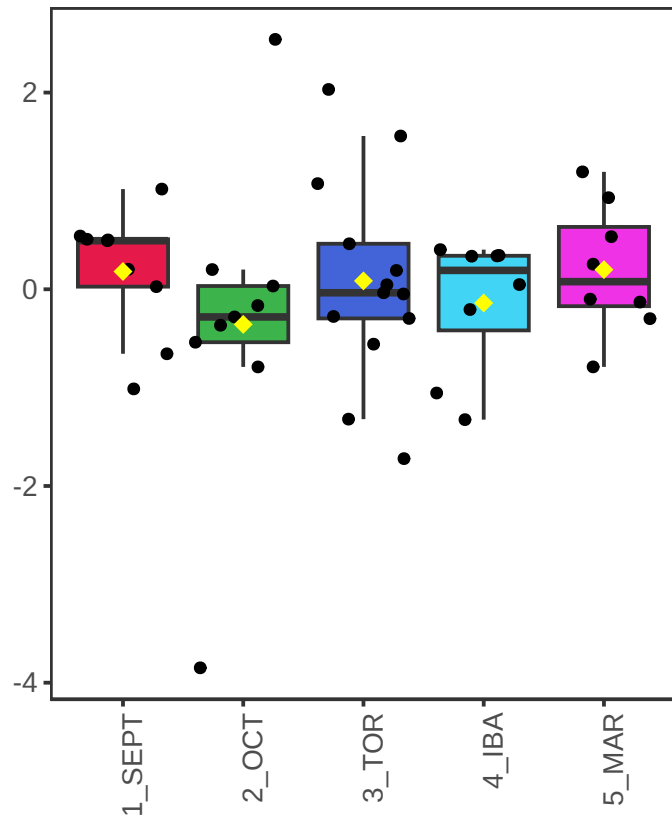

# Lactic acid

Original Conc.

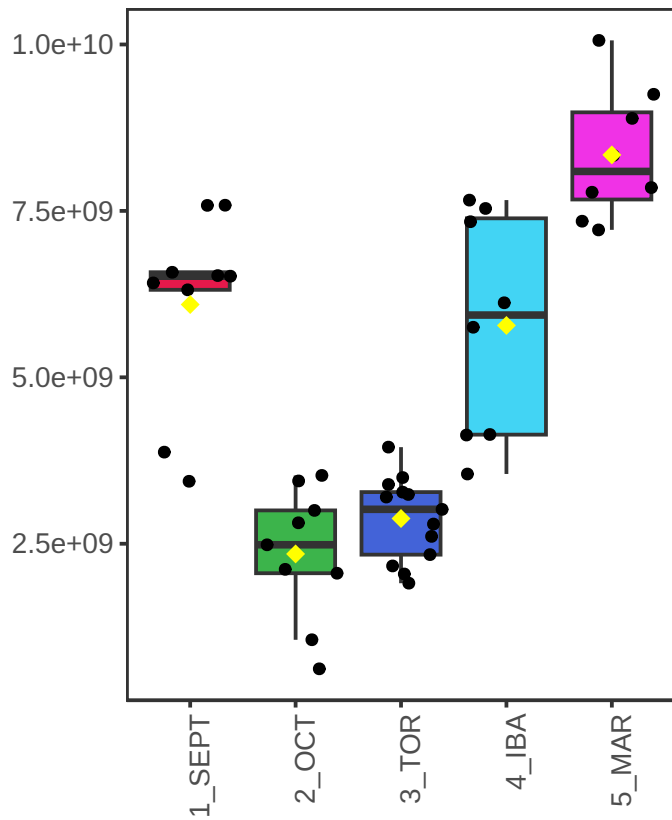

Normalized Conc.

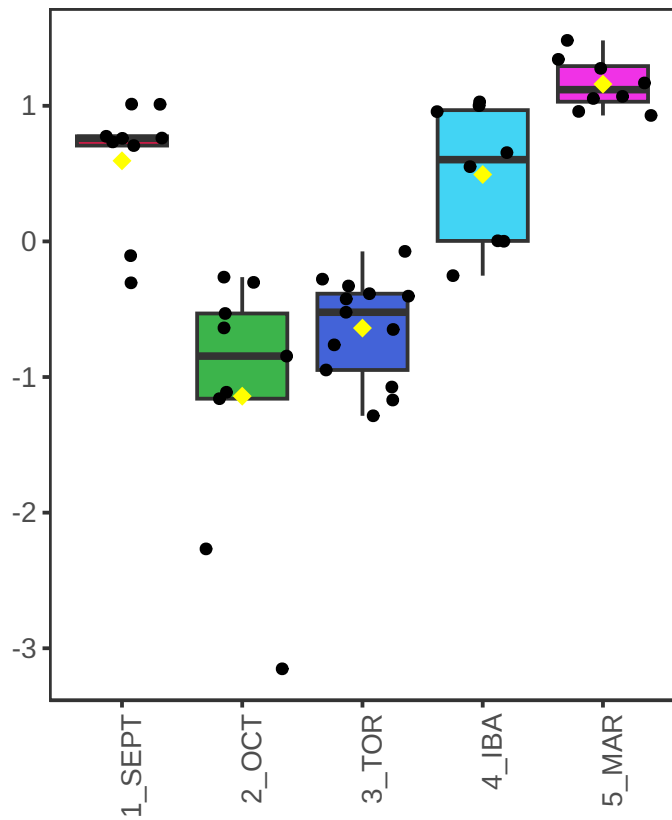

# Levulinic acid

Original Conc.

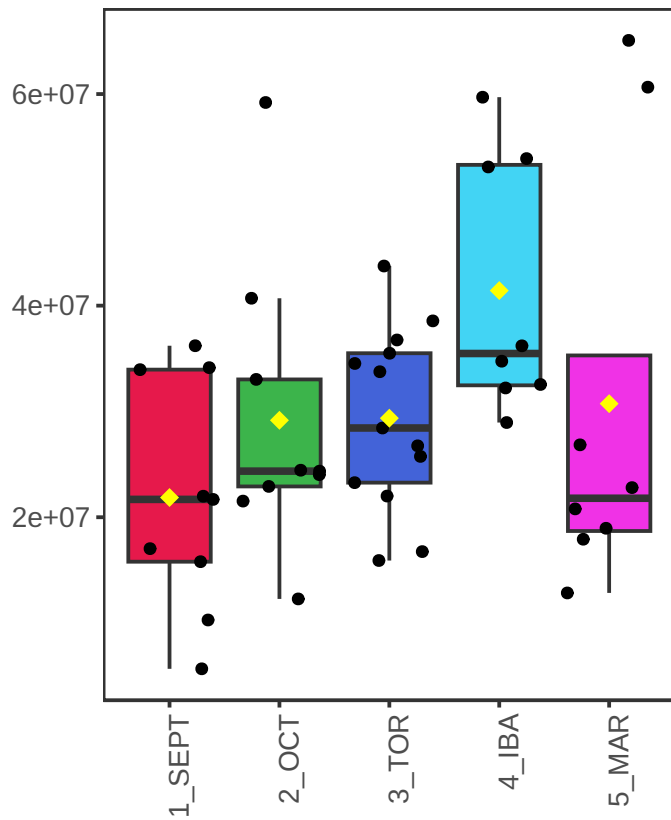

Normalized Conc.

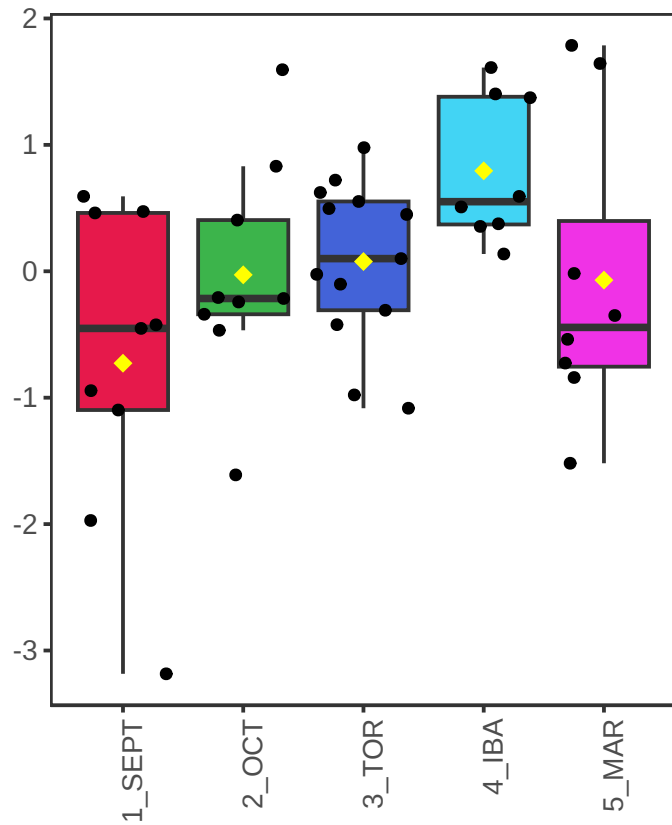

# Meglumine

Original Conc.

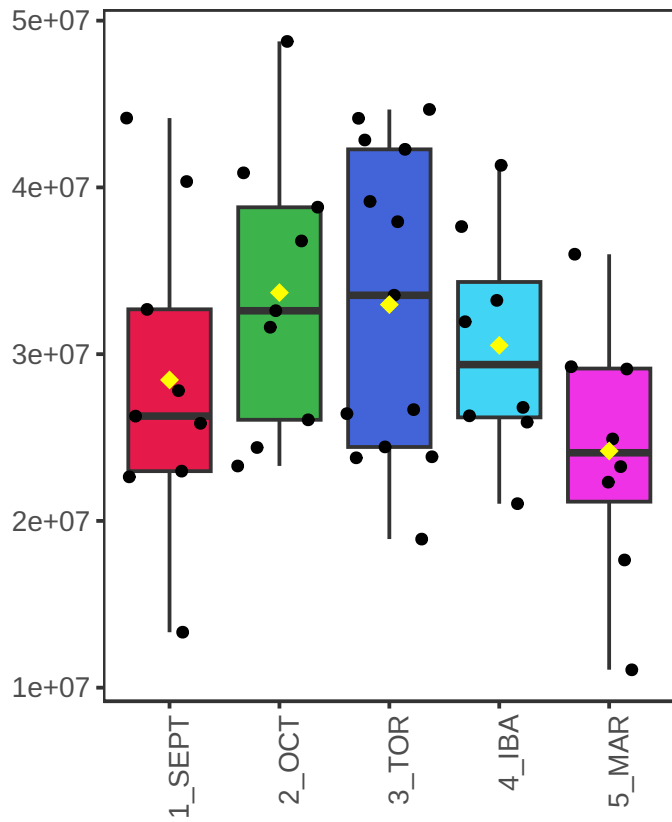

Normalized Conc.

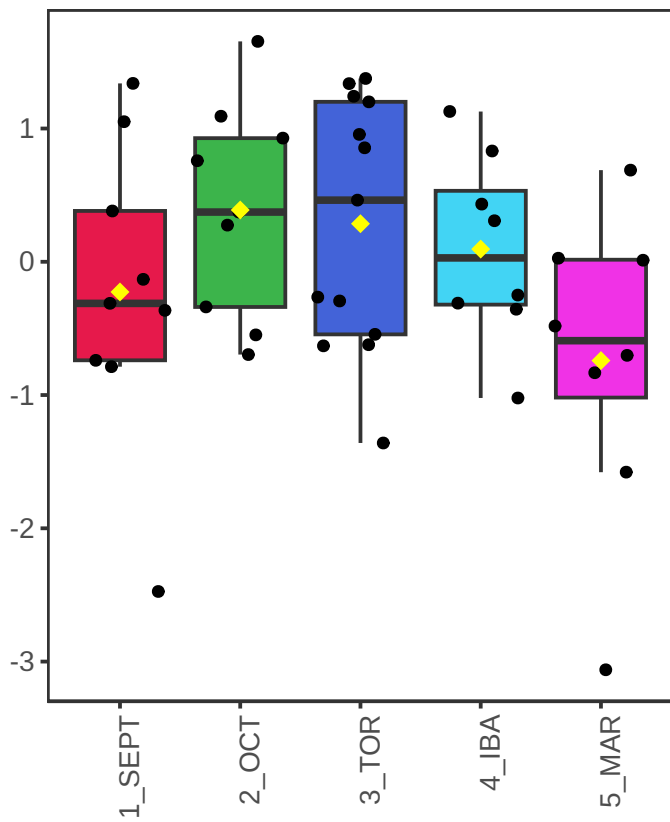

# Methanesulfonic acid

Original Conc.

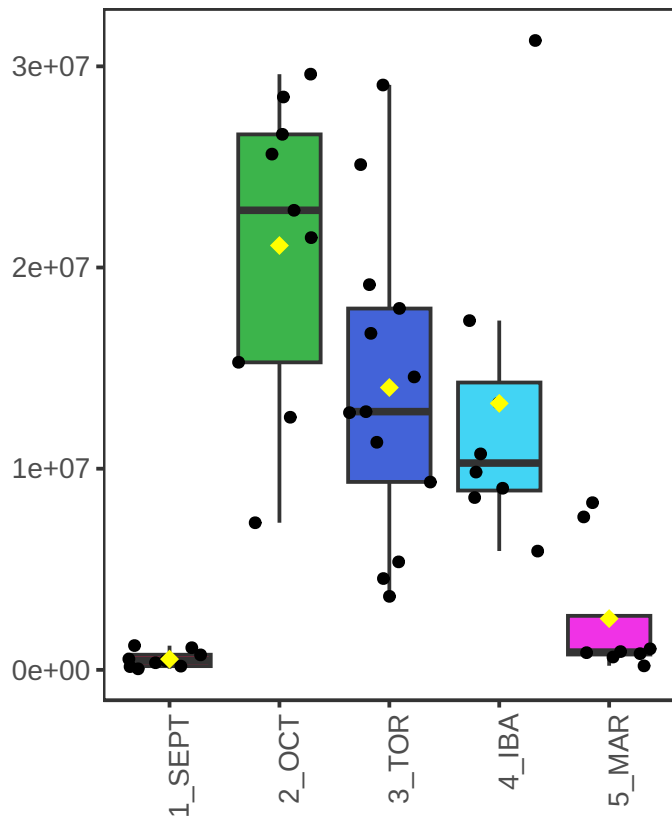

Normalized Conc.

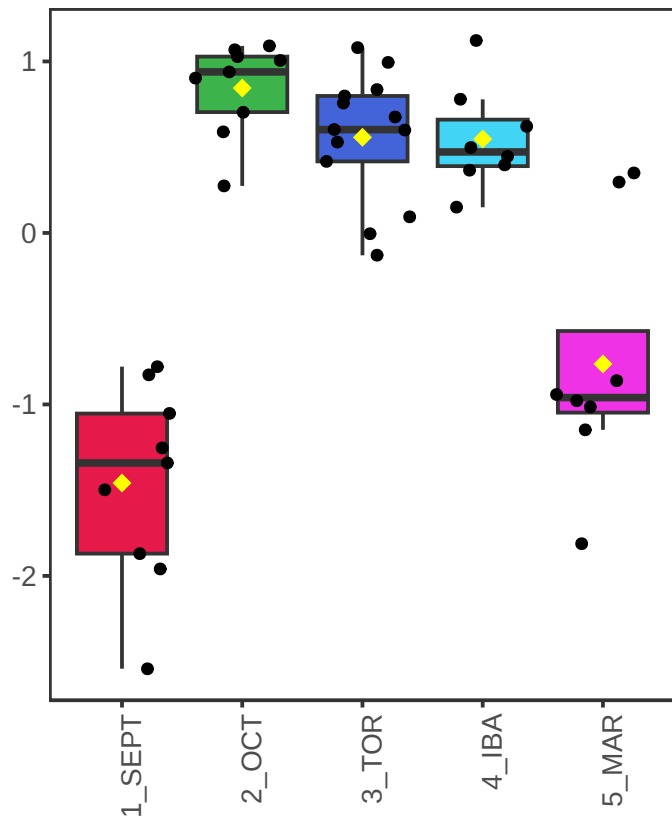

# Methylmalonic acid

Original Conc.

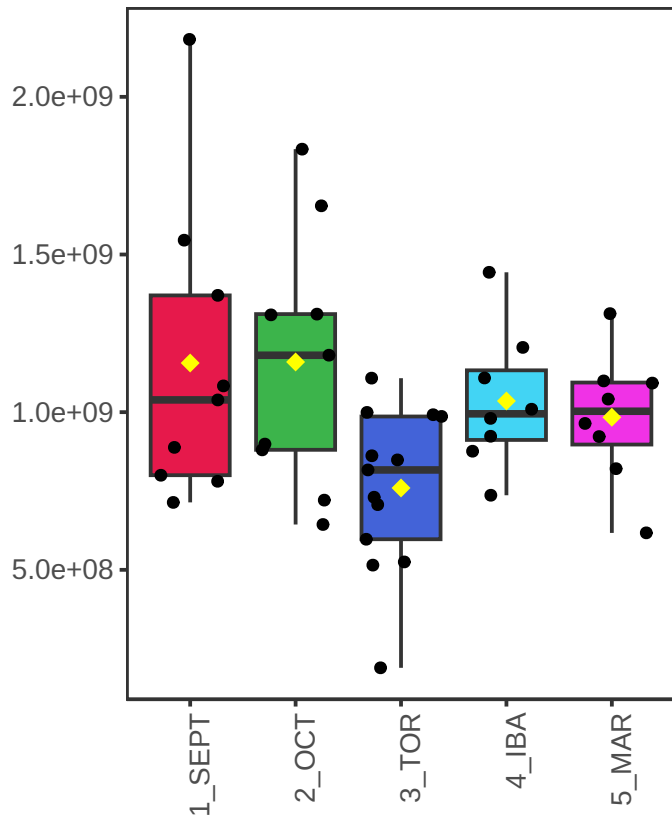

Normalized Conc.

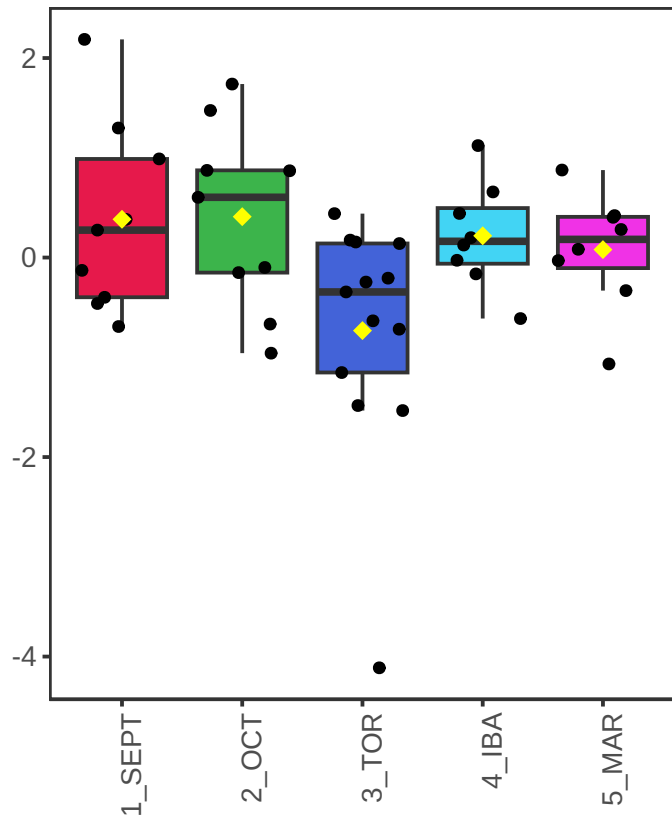



# Methyl salicylate

Original Conc.

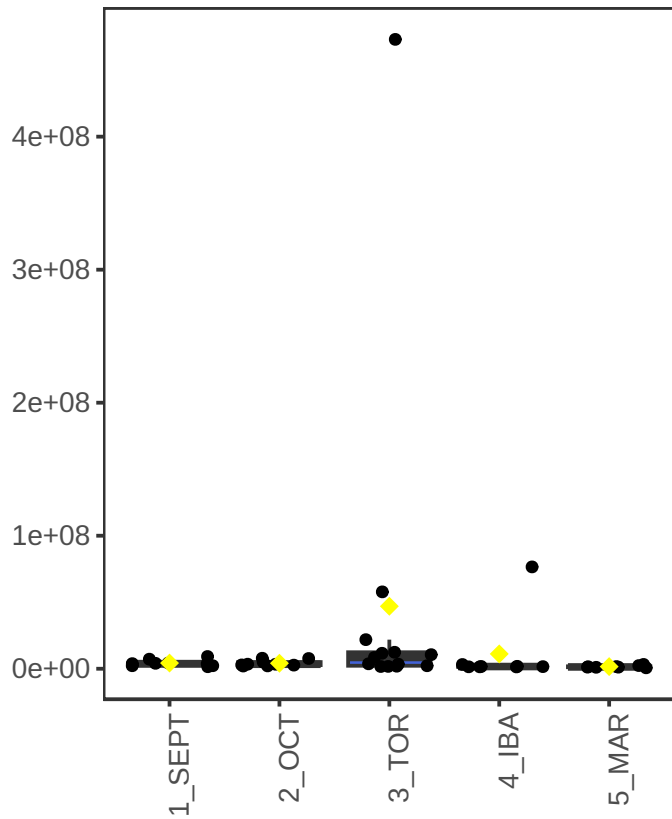

Normalized Conc.

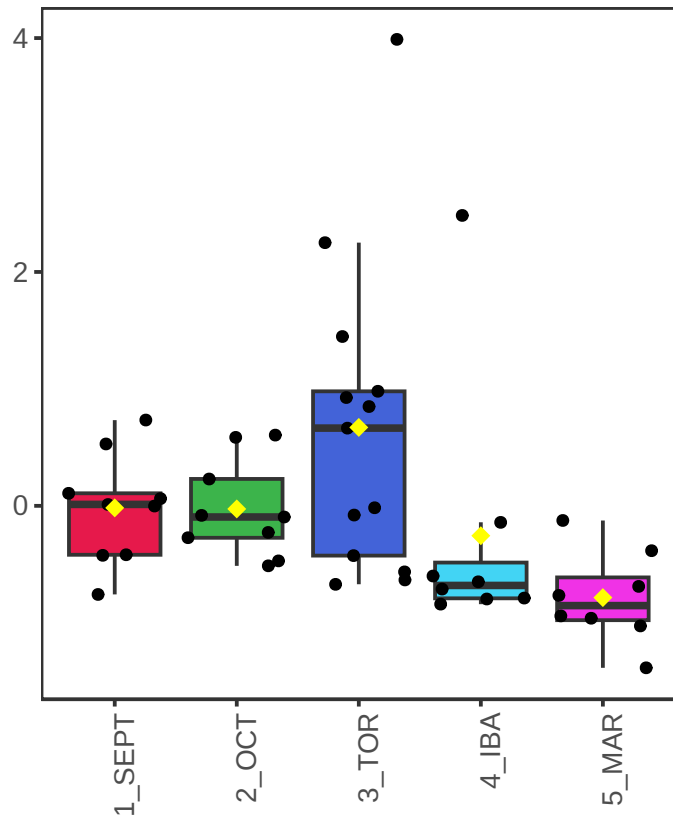

# Mevalonic acid

Original Conc.

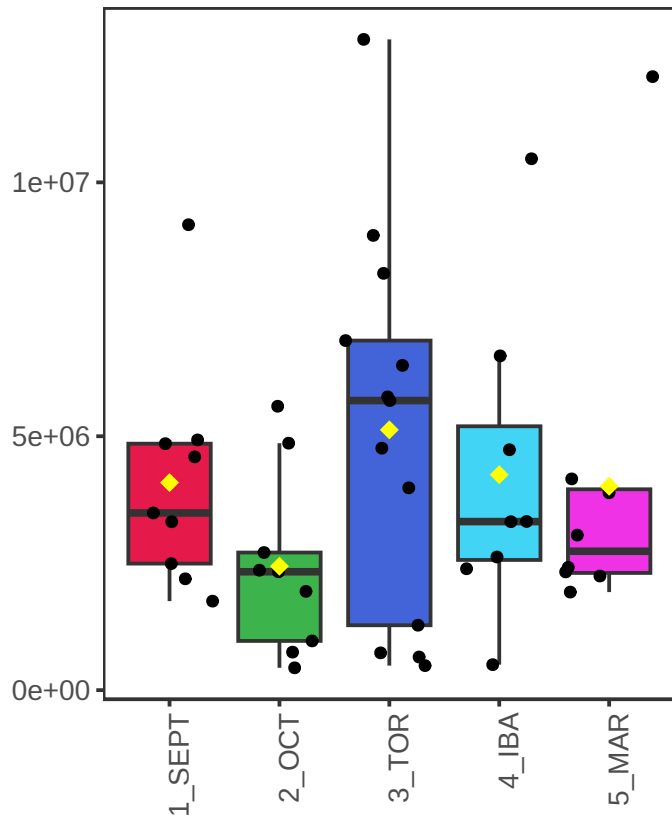

Normalized Conc.

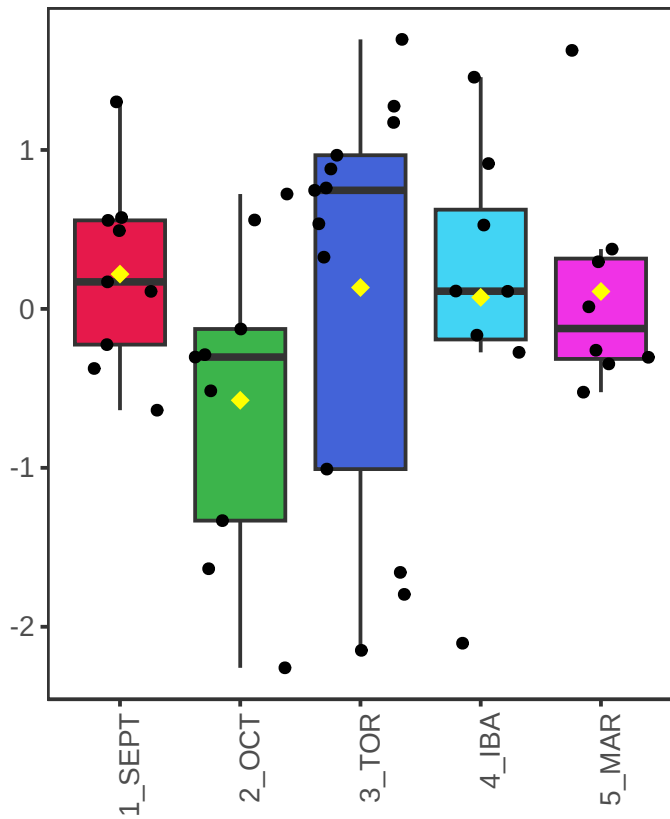

# Myristyl sulfate

Original Conc.

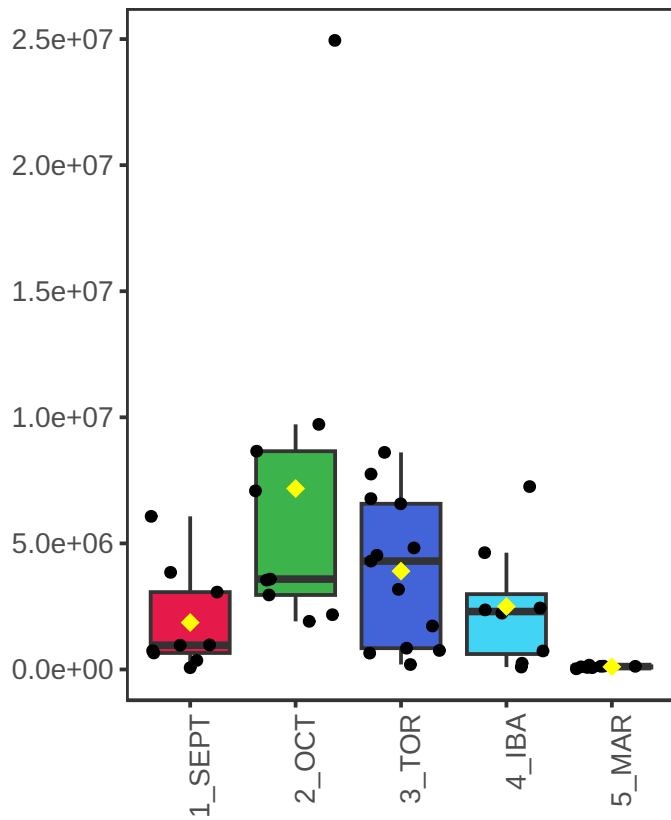

Normalized Conc.

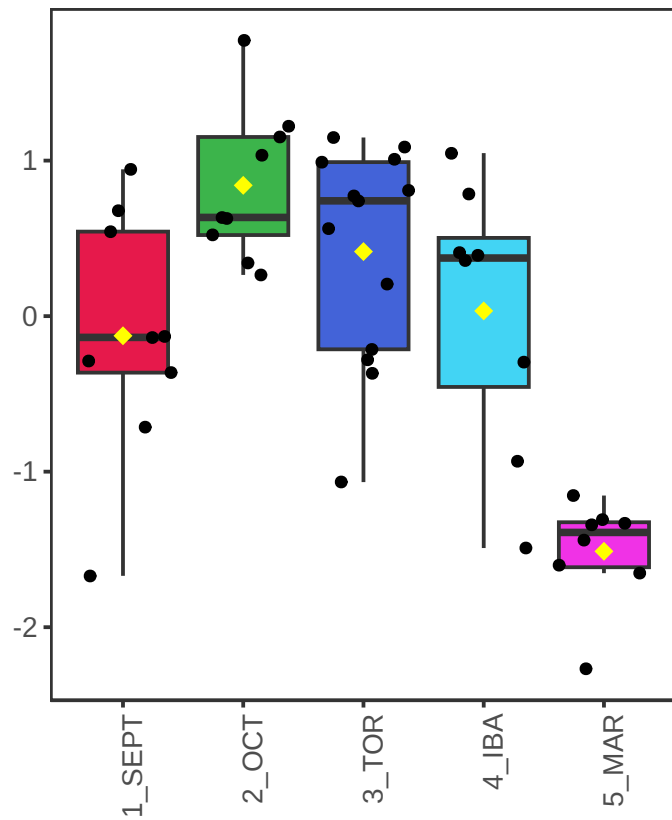

# N-Acetylalanine

Original Conc.

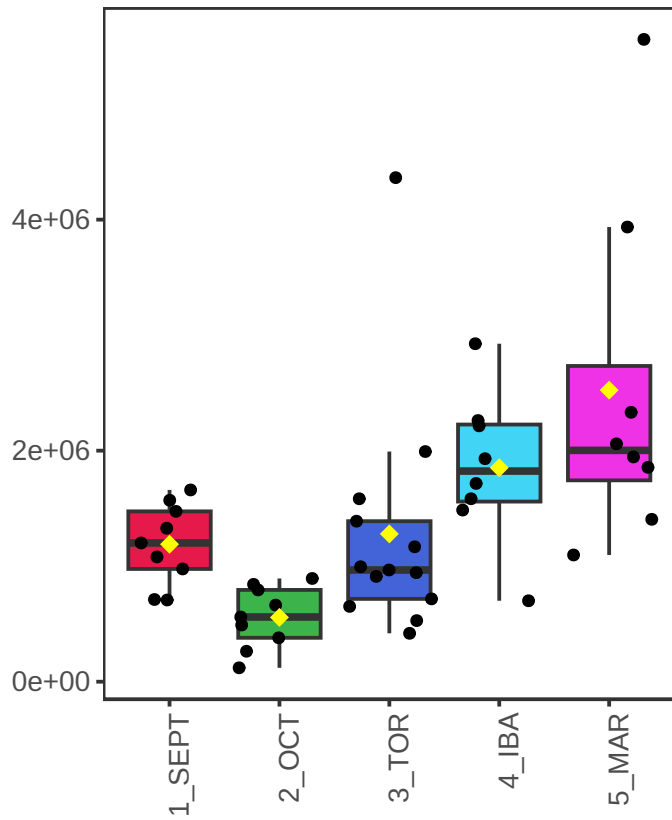

Normalized Conc.

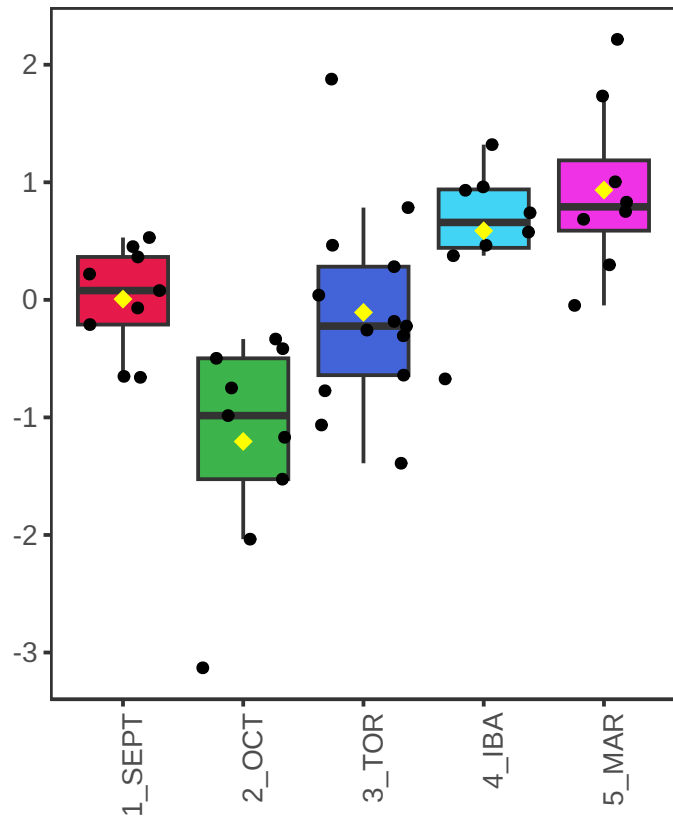

# n-Butyl lactate

Original Conc.

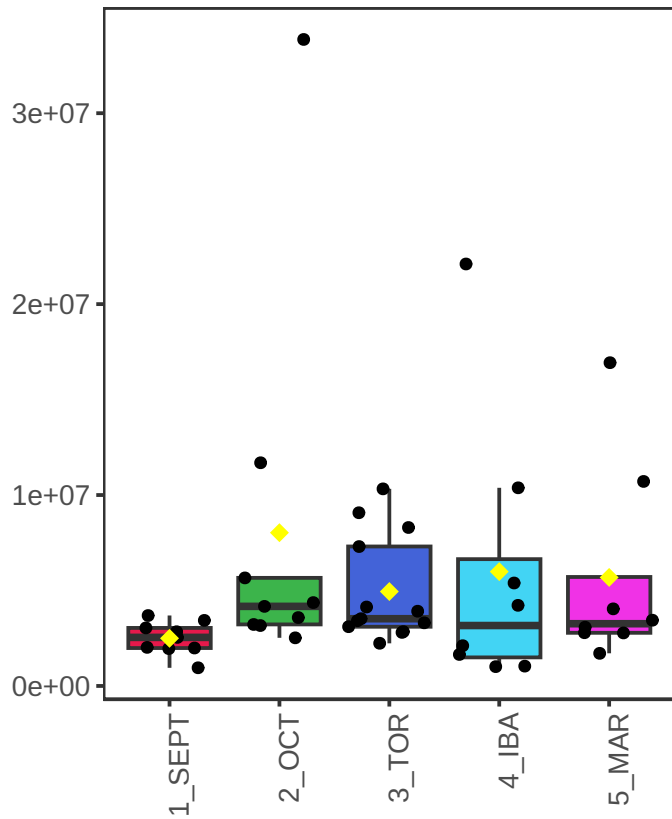

Normalized Conc.

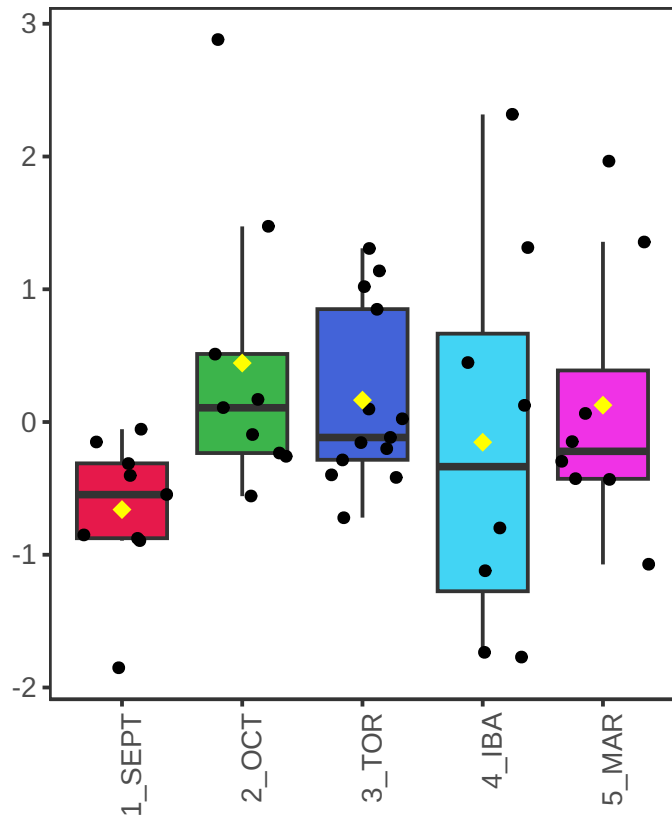

# N-Ethylglycine

Original Conc.

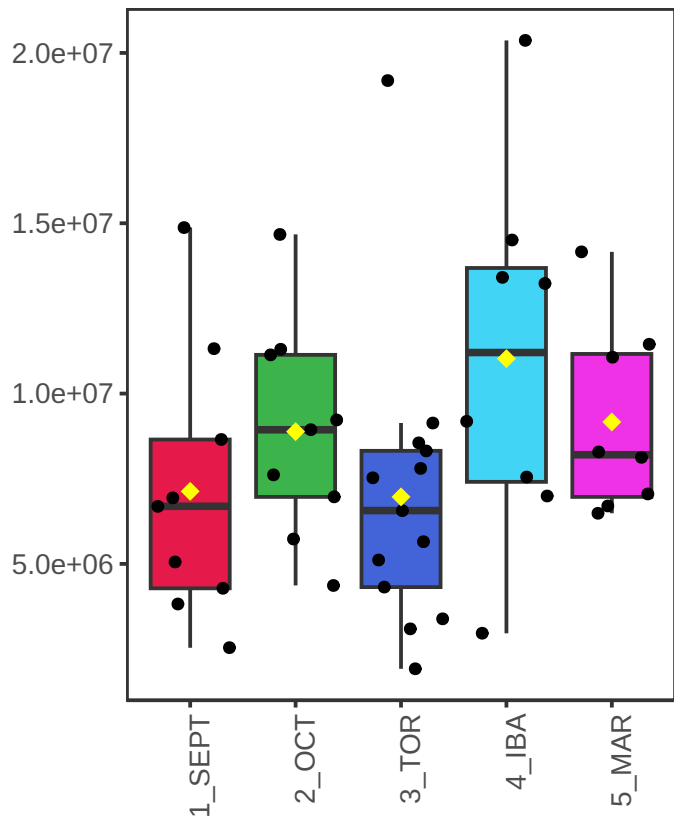

Normalized Conc.

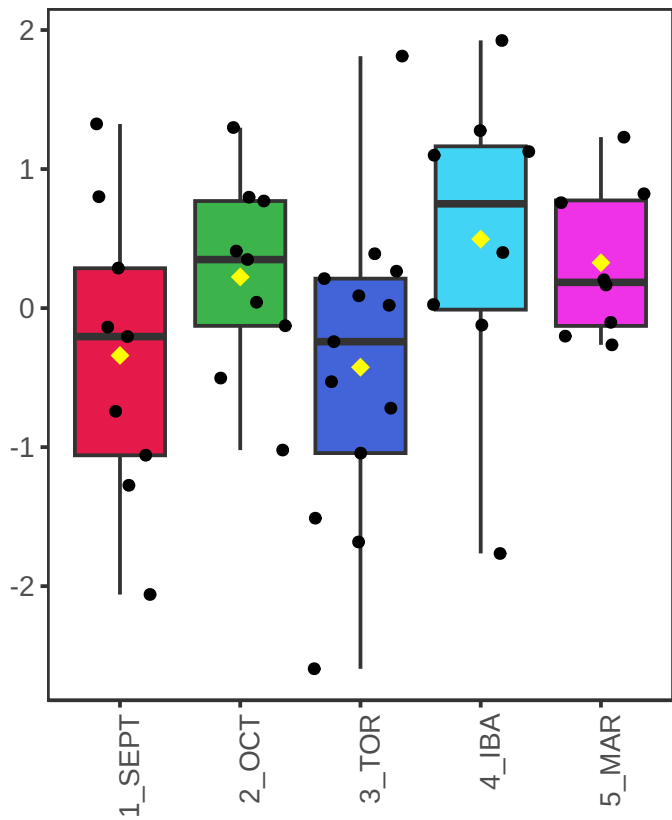



# N-methyl-2-oxoglutaramic acid

Original Conc.

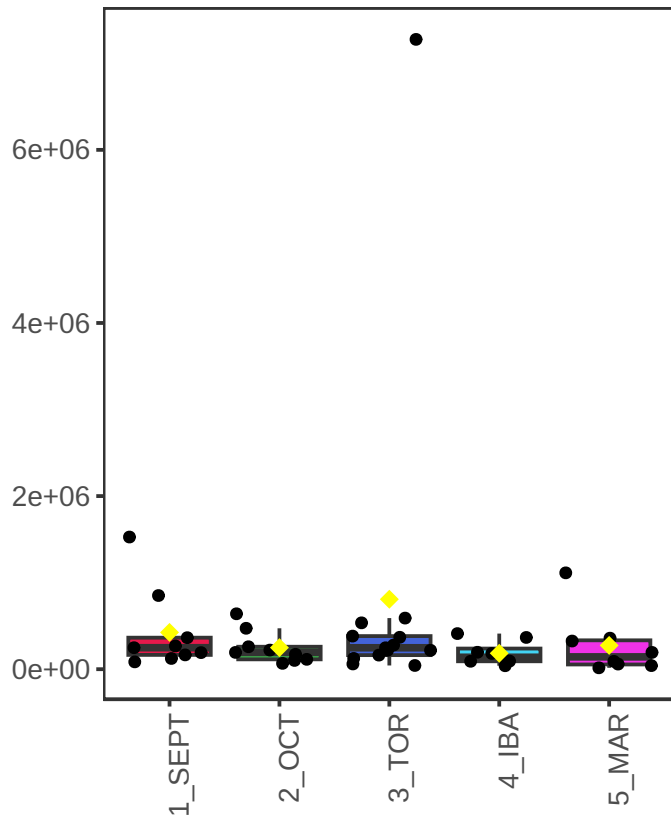

Normalized Conc.

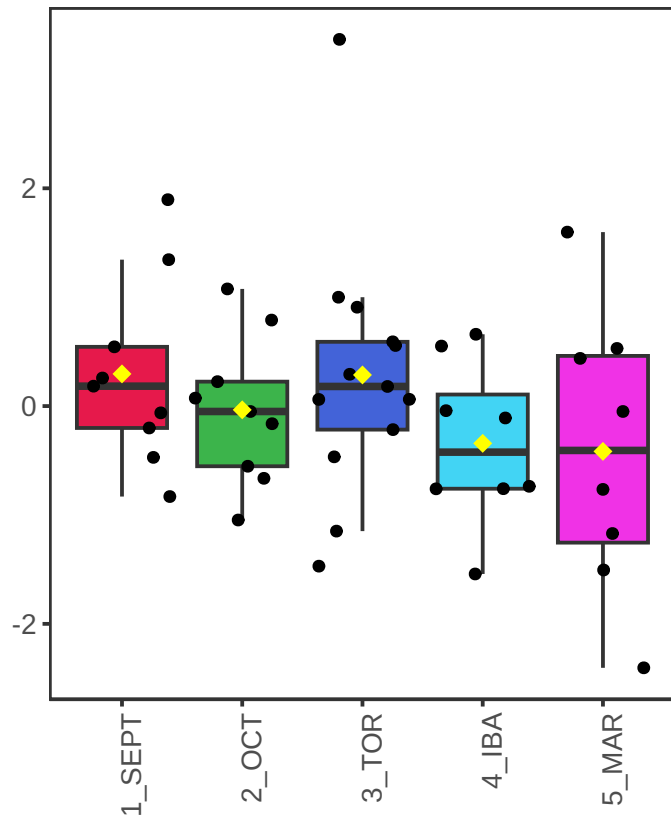



# N,N-Dihydroxy-L-tryptophan

Original Conc.

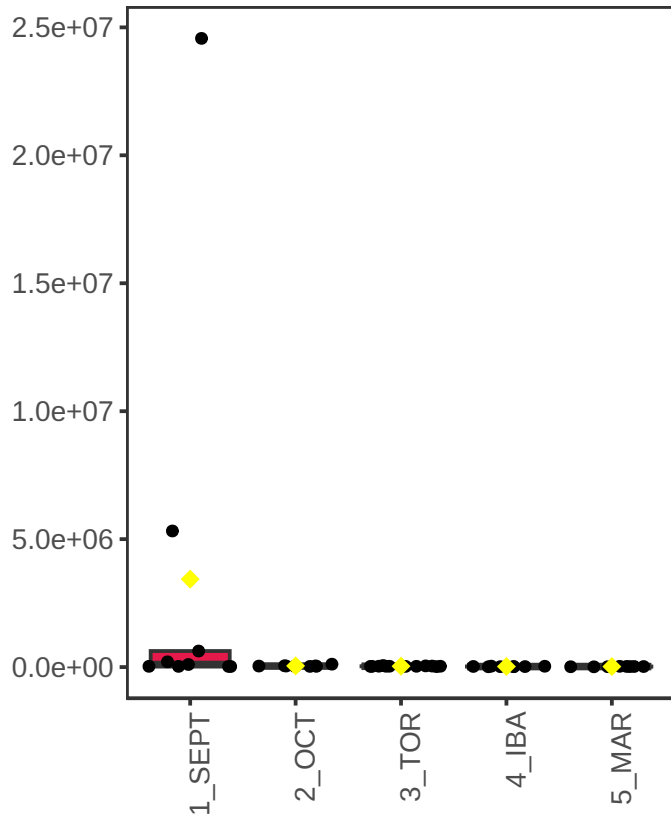

Normalized Conc.

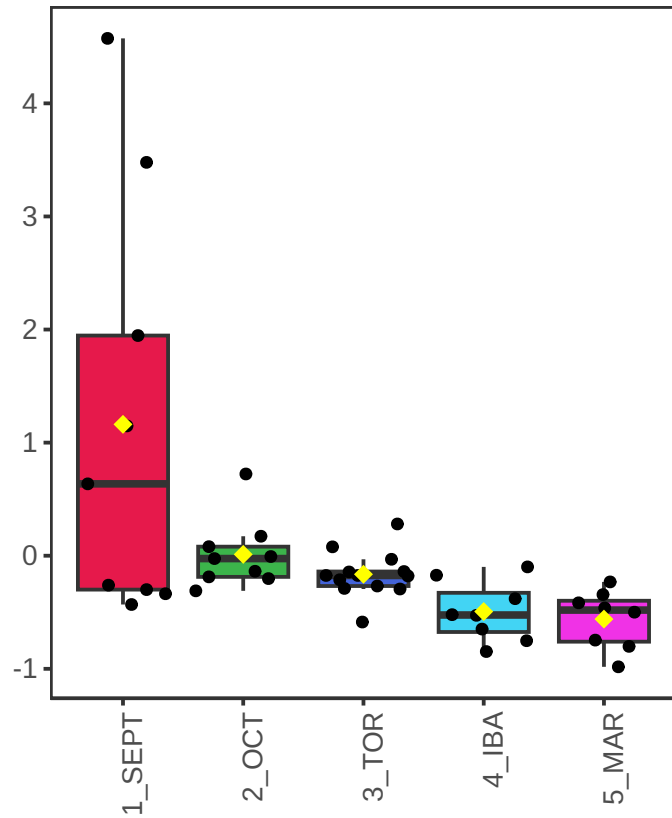

# N-Undecanoylglycine

Original Conc.

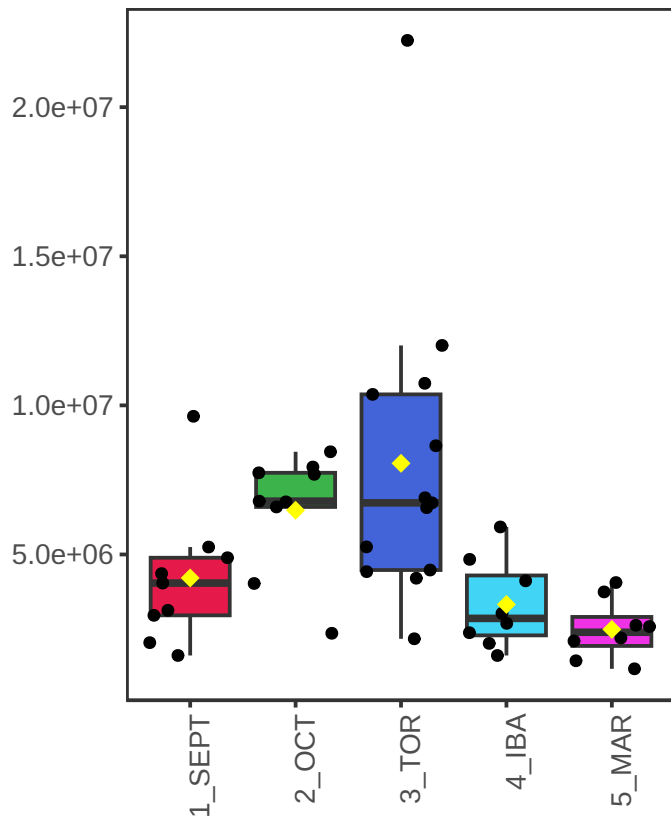

Normalized Conc.

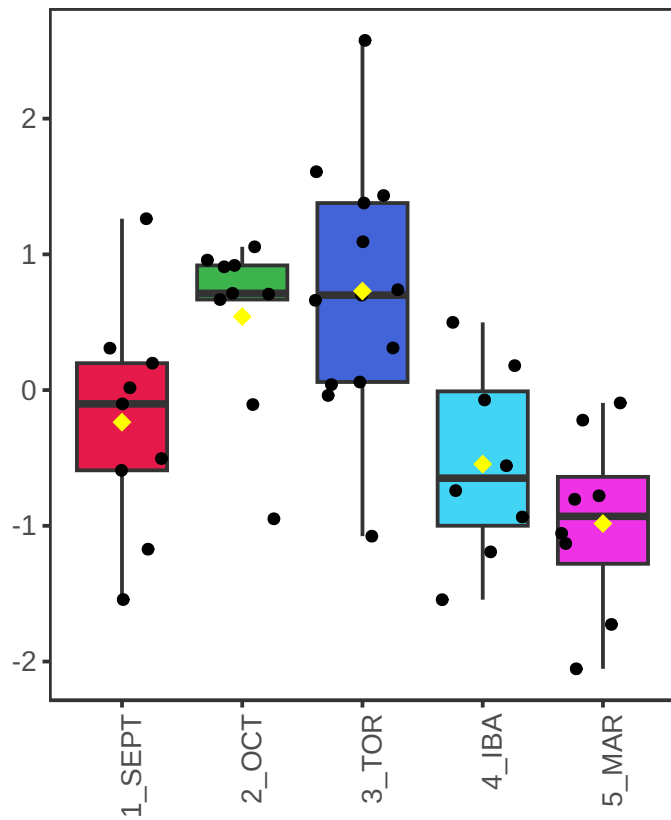

# Pantothenic acid

Original Conc.

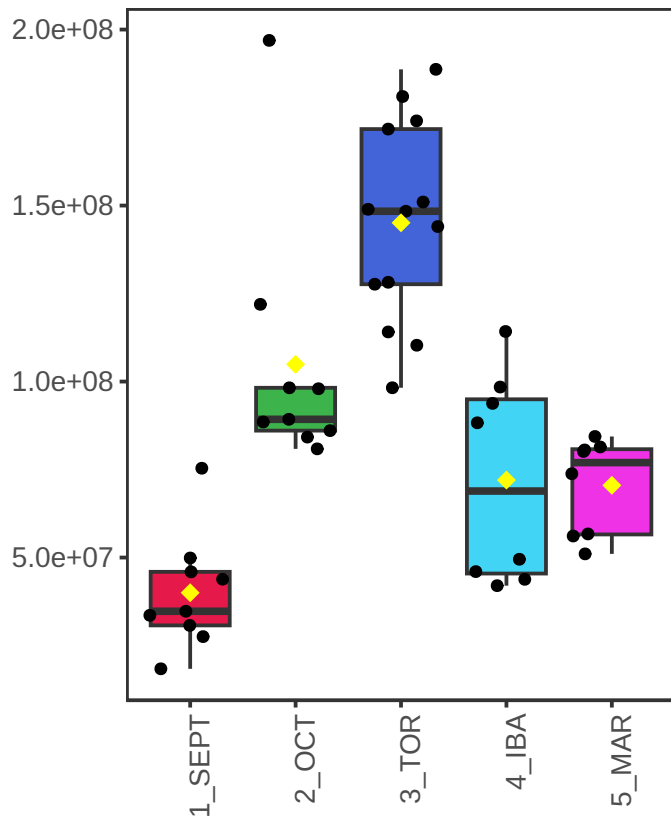

Normalized Conc.

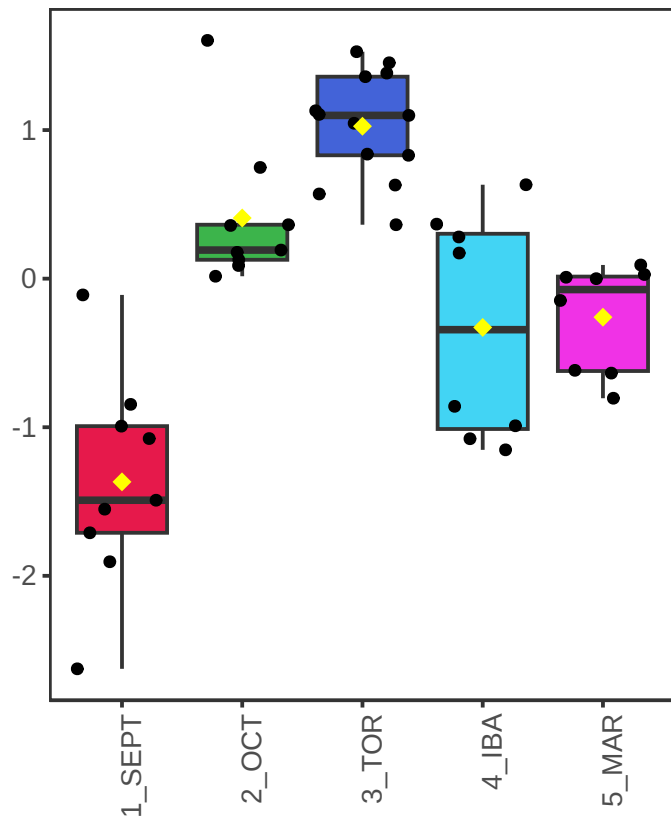

# p-Cresylsulfate

## Original Conc.

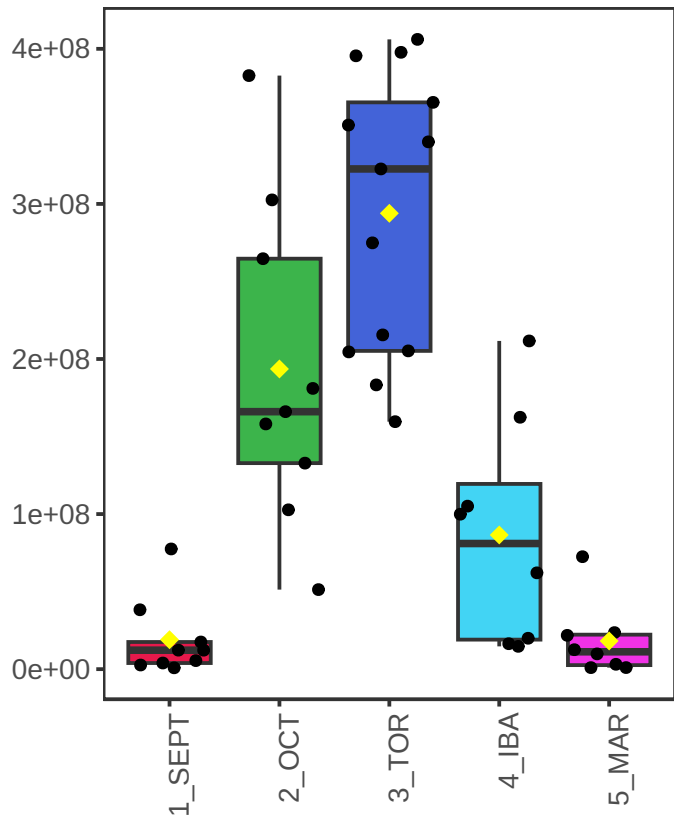

## Normalized Conc.

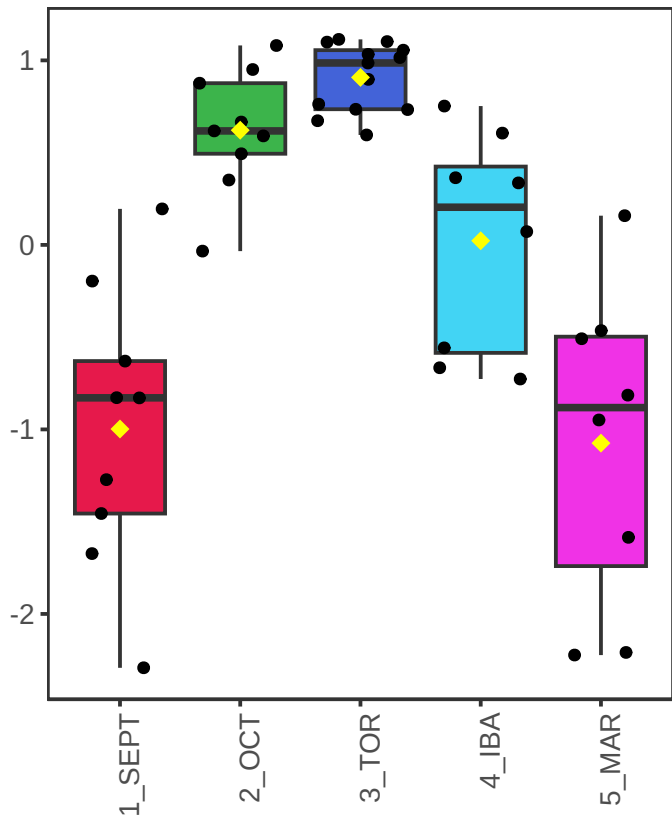

# Phenylacetaldehyde

Original Conc.

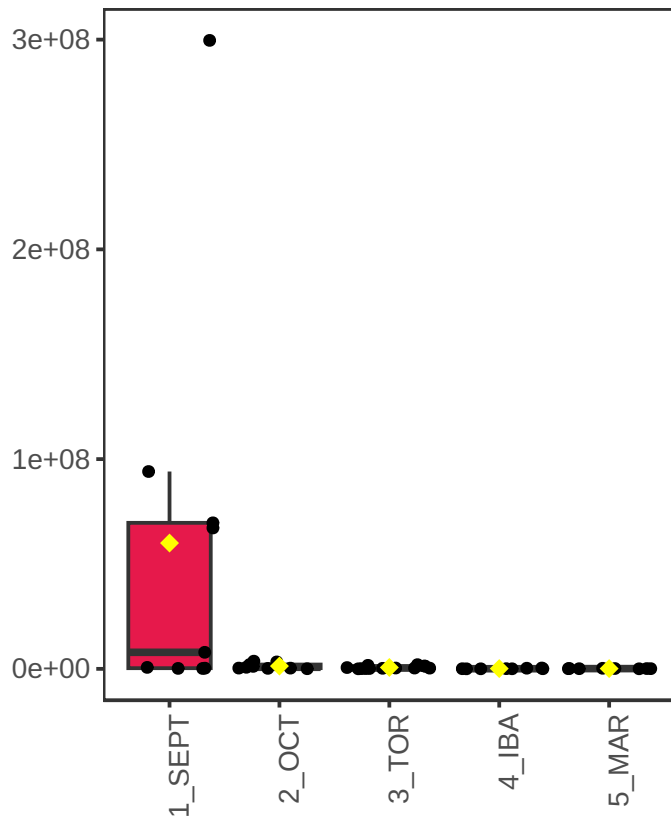

Normalized Conc.

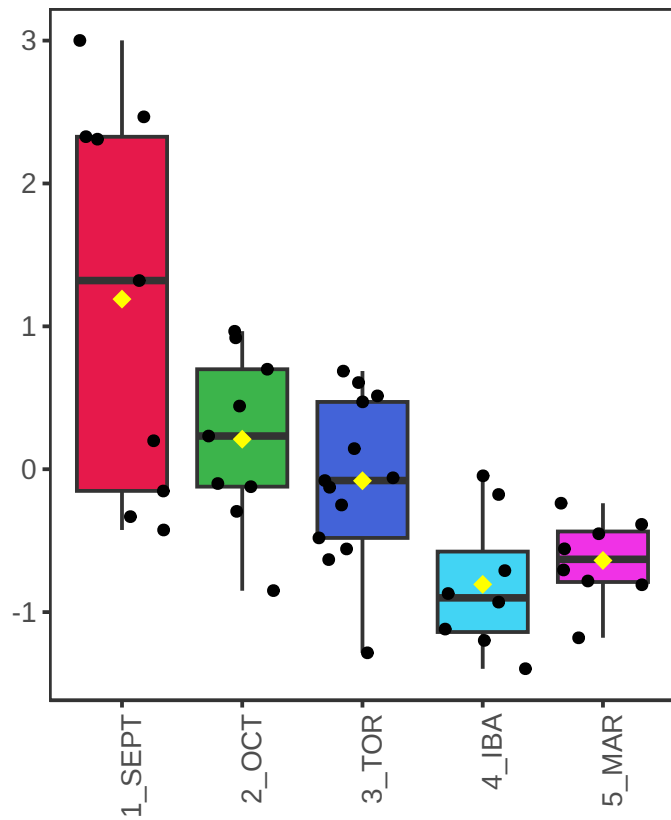

# Phosphoethanolamine

Original Conc.

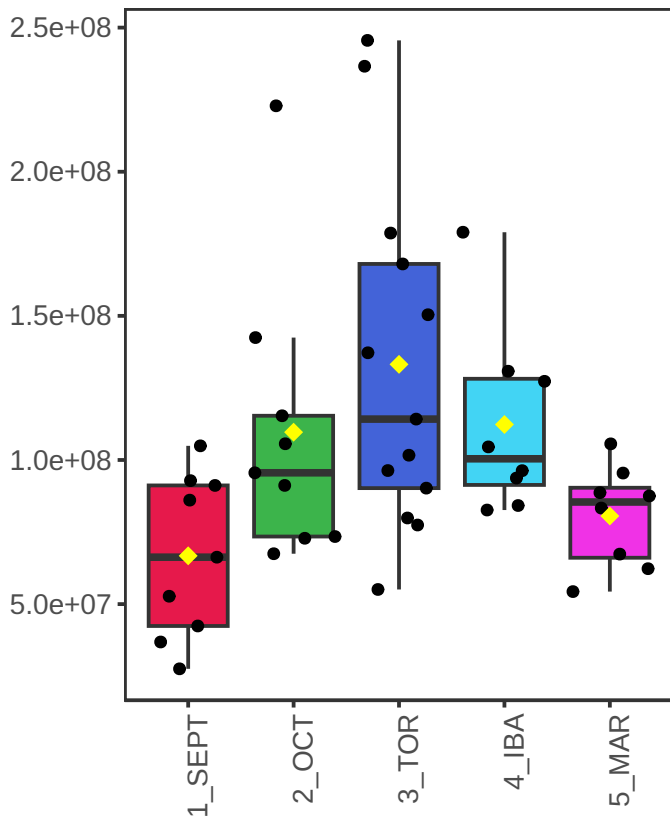

Normalized Conc.

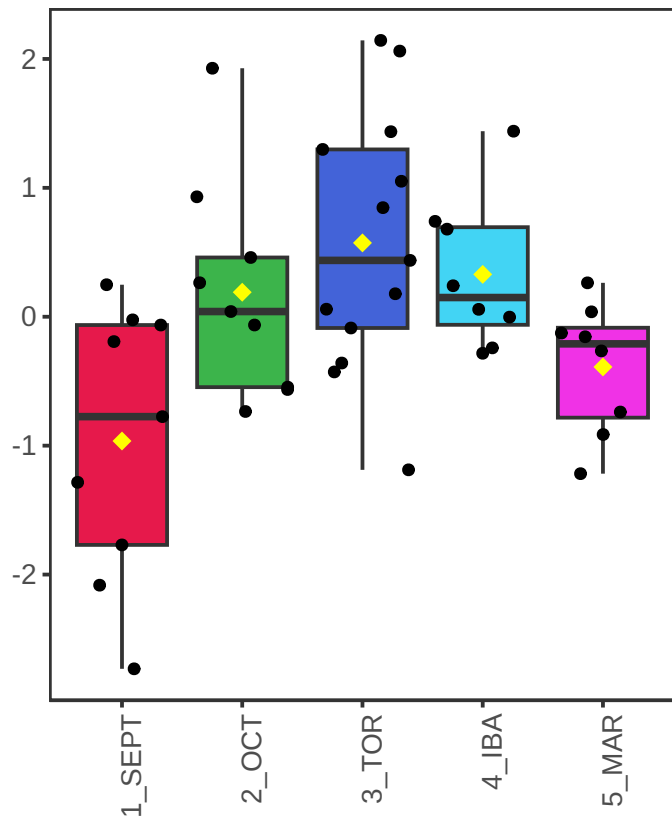

# Pimelic acid

## Original Conc.

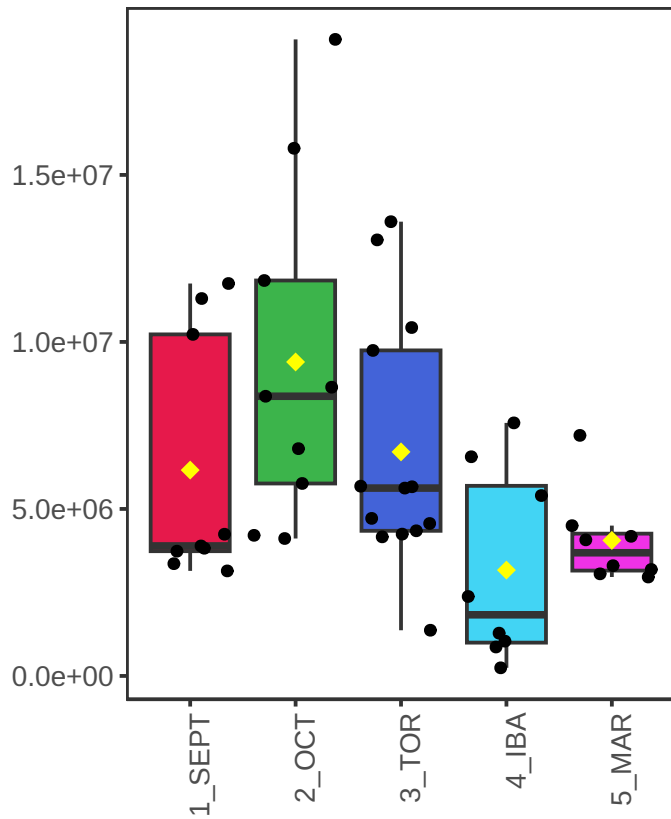

## Normalized Conc.

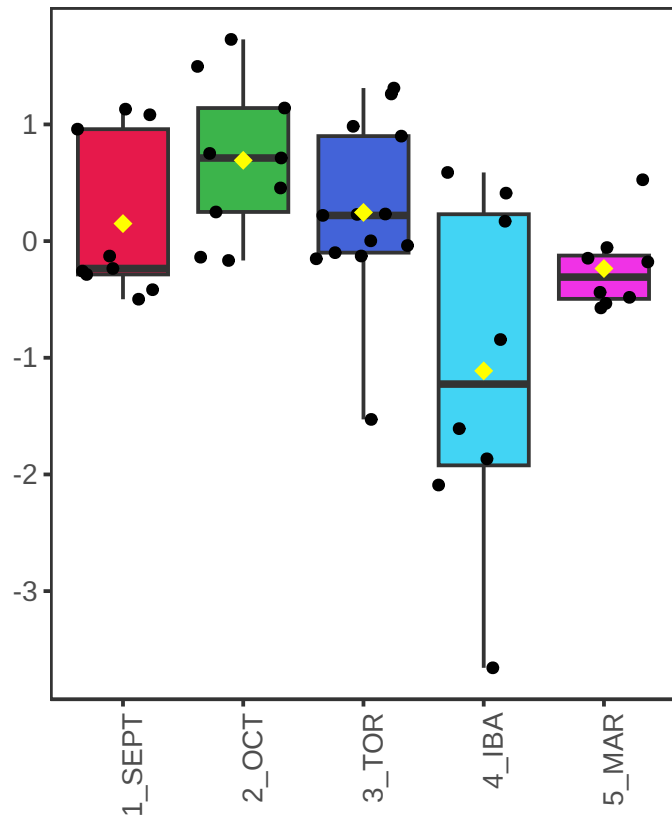

# Pyruvic acid

Original Conc.

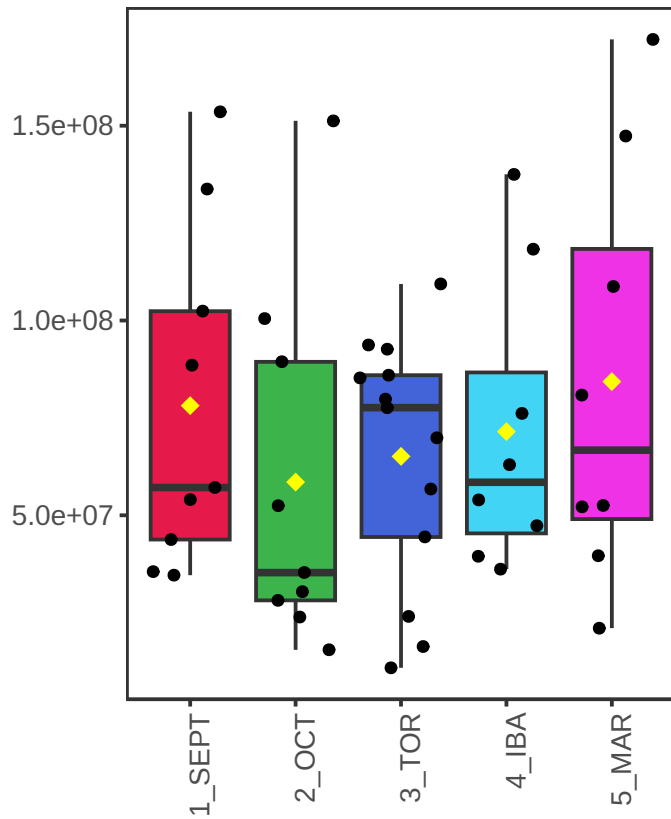

Normalized Conc.

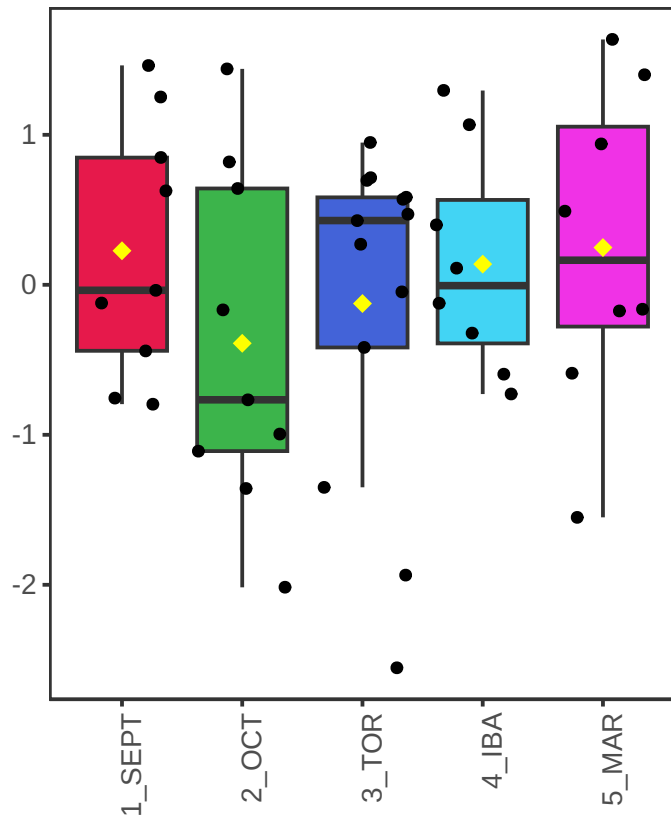



# Quinol sulfate

Original Conc.

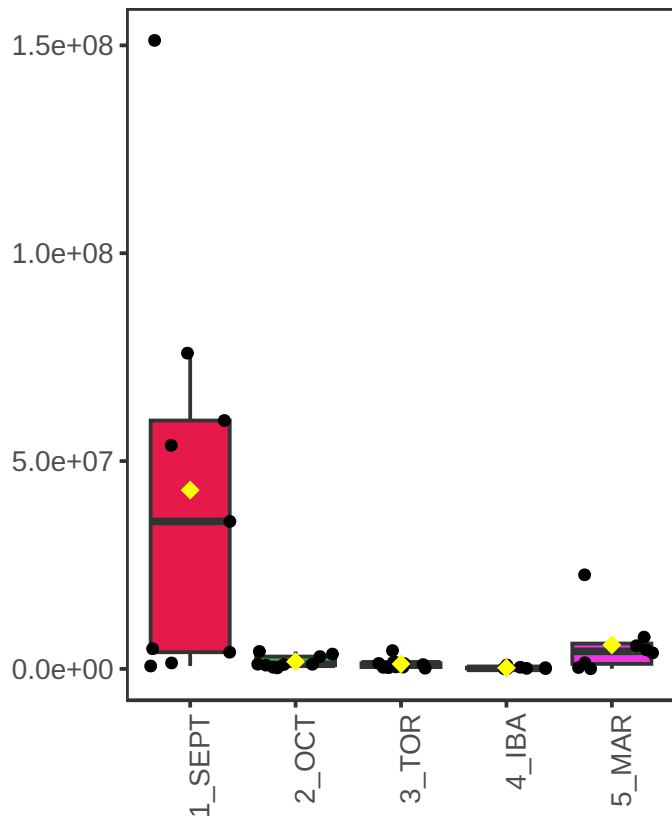

Normalized Conc.

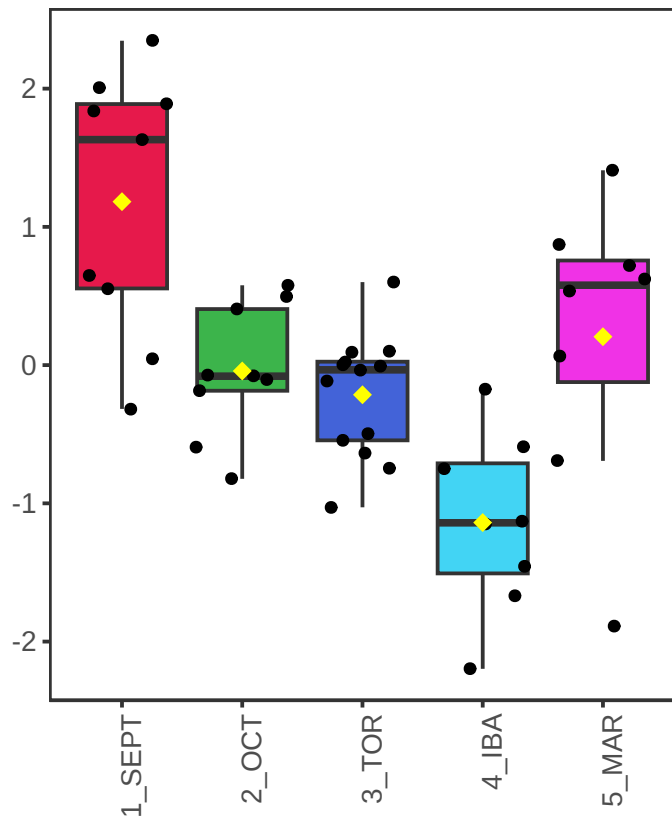

# Serine

Original Conc.

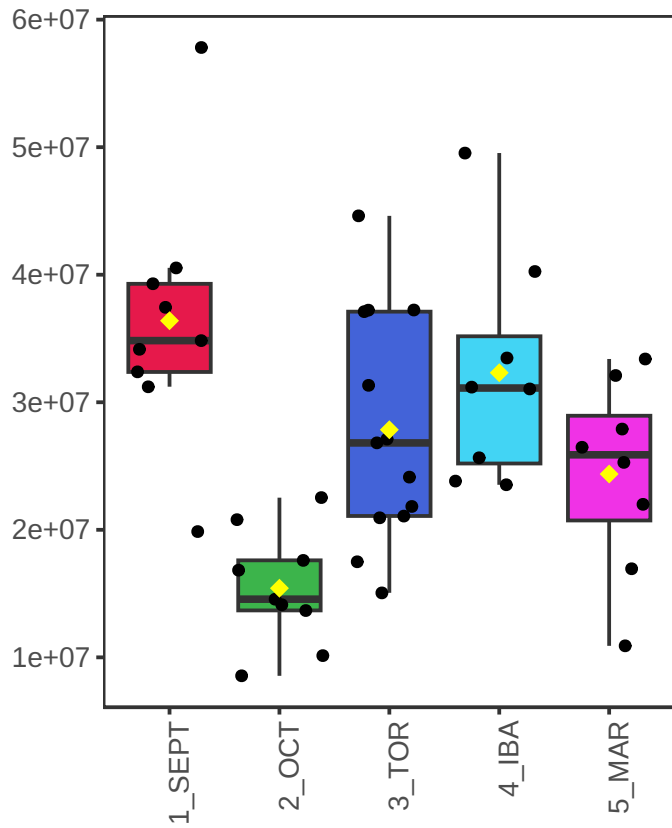

Normalized Conc.

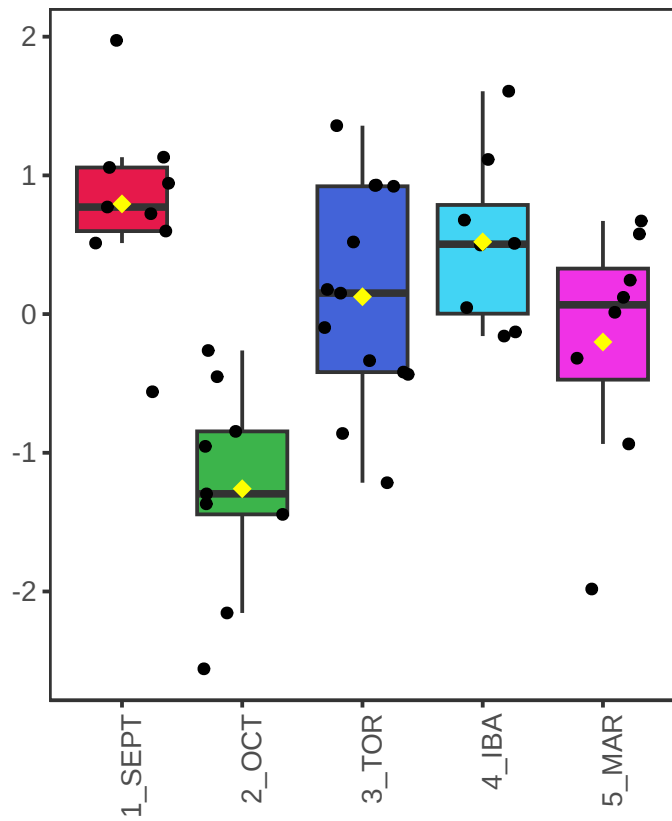

# Succinic anhydride

Original Conc.

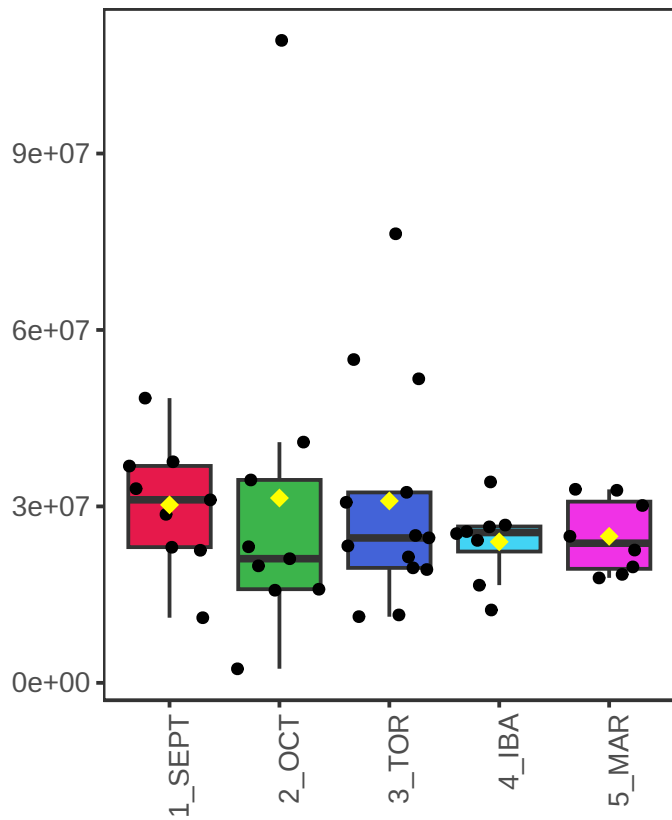

Normalized Conc.

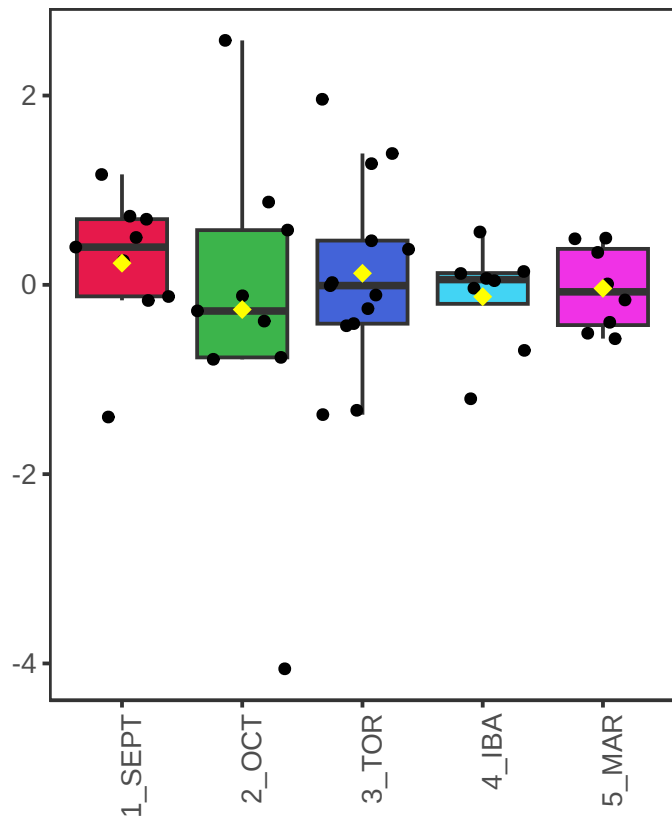

# Threonine

Original Conc.

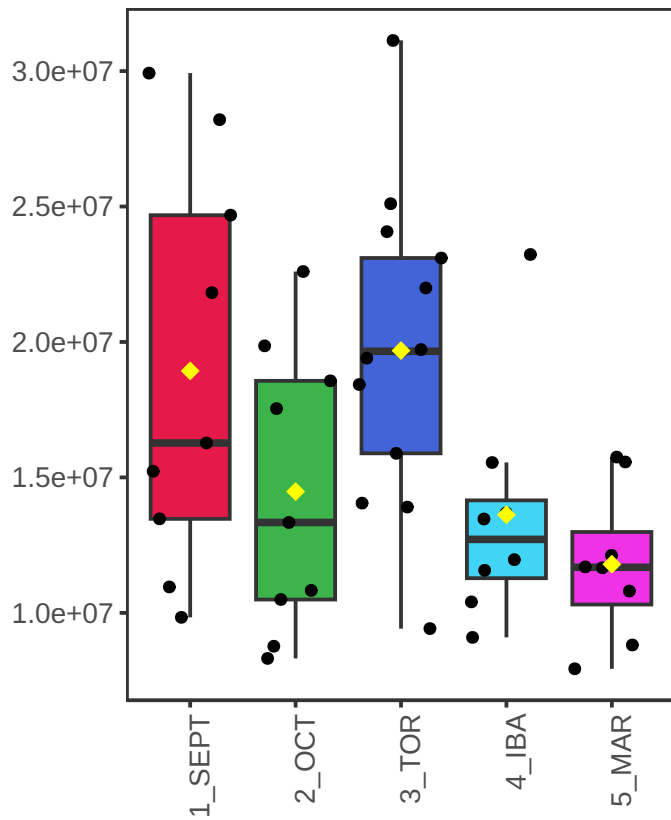

Normalized Conc.

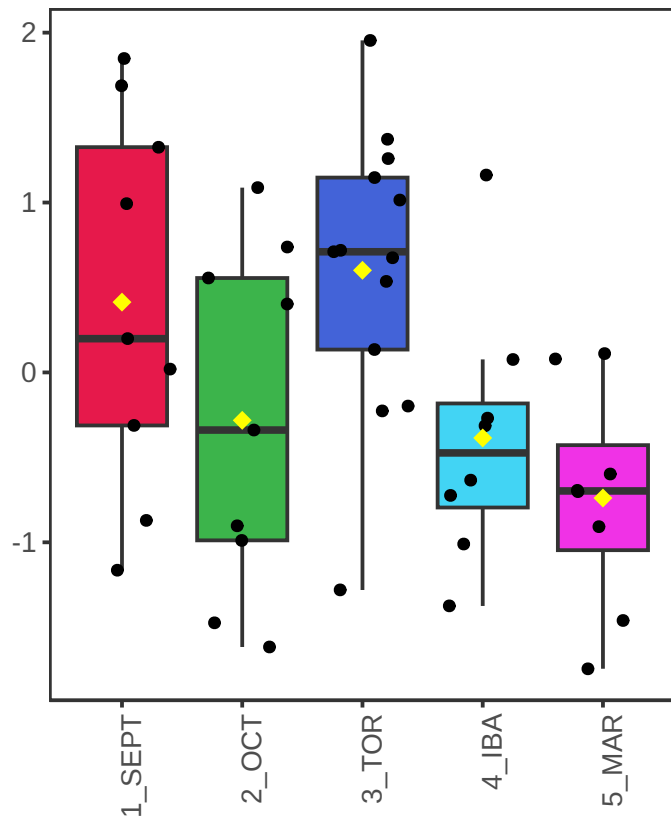

# Uracil

## Original Conc.

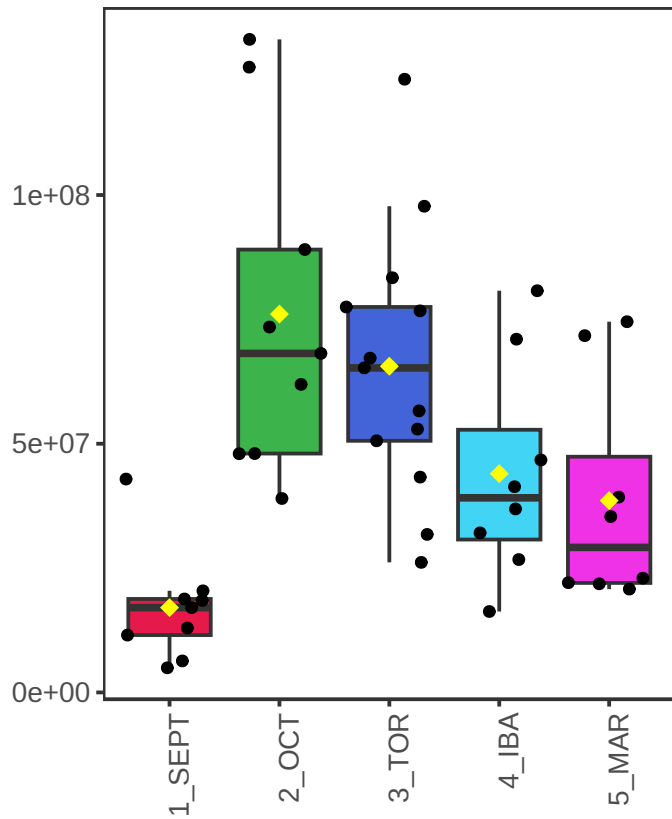

## Normalized Conc.

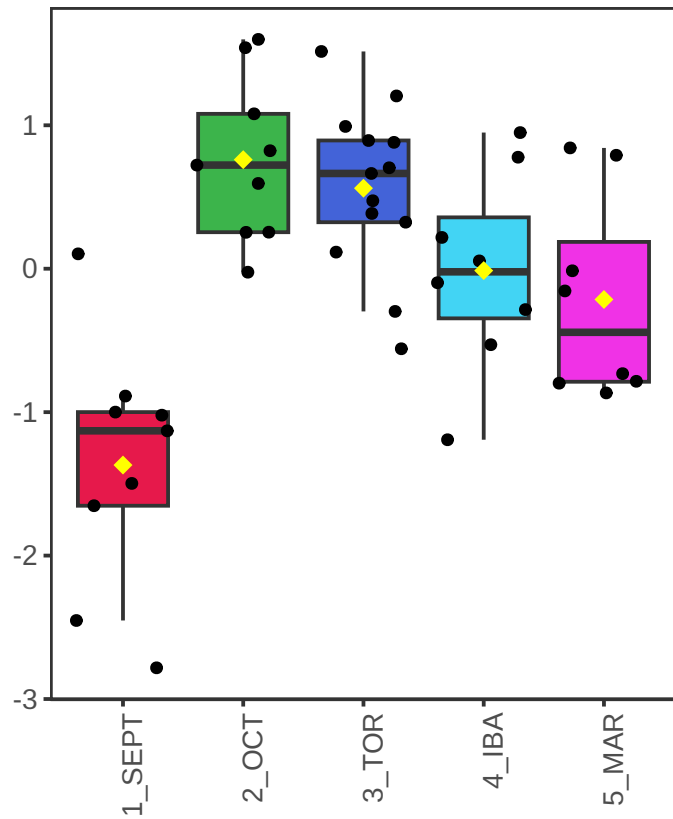

# Uridine

Original Conc.

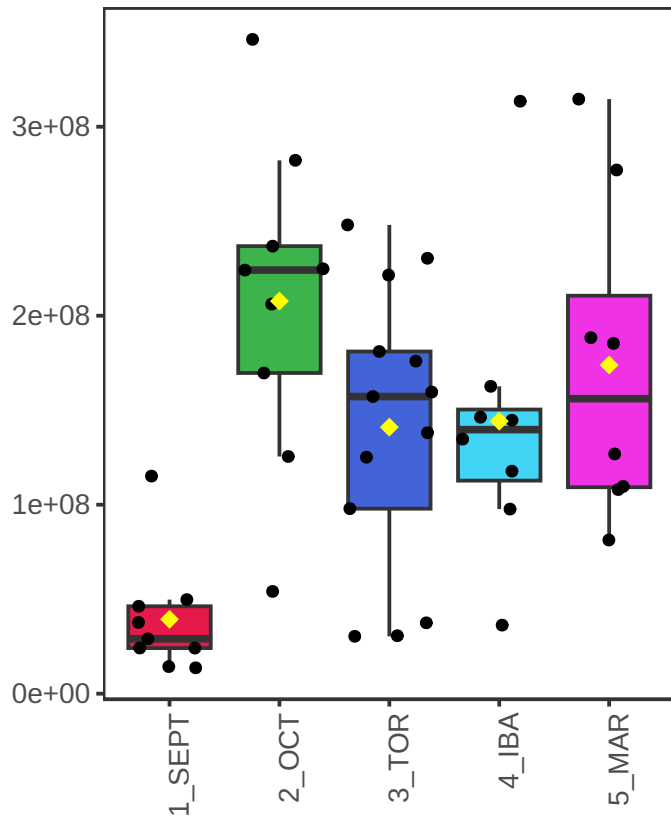

Normalized Conc.

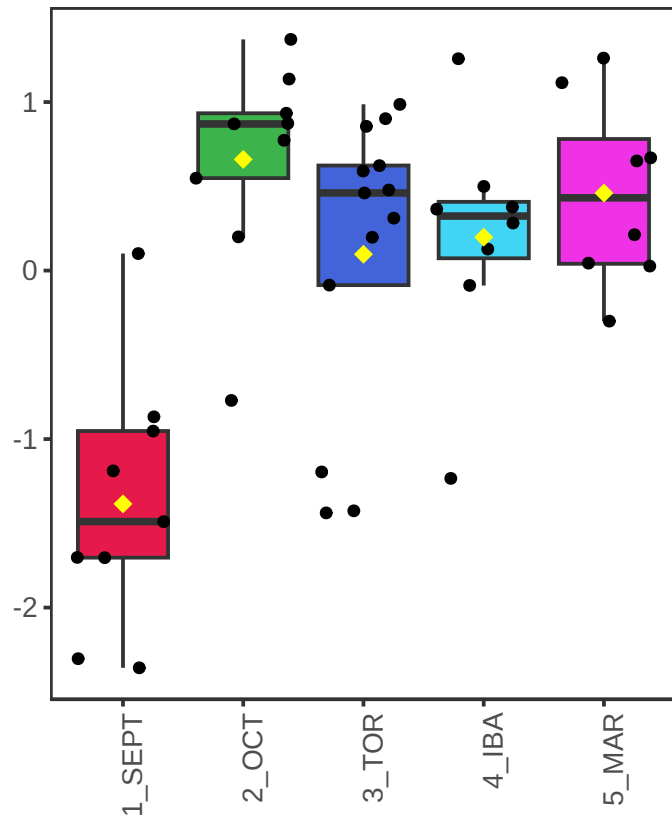

# Urocanic acid

Original Conc.

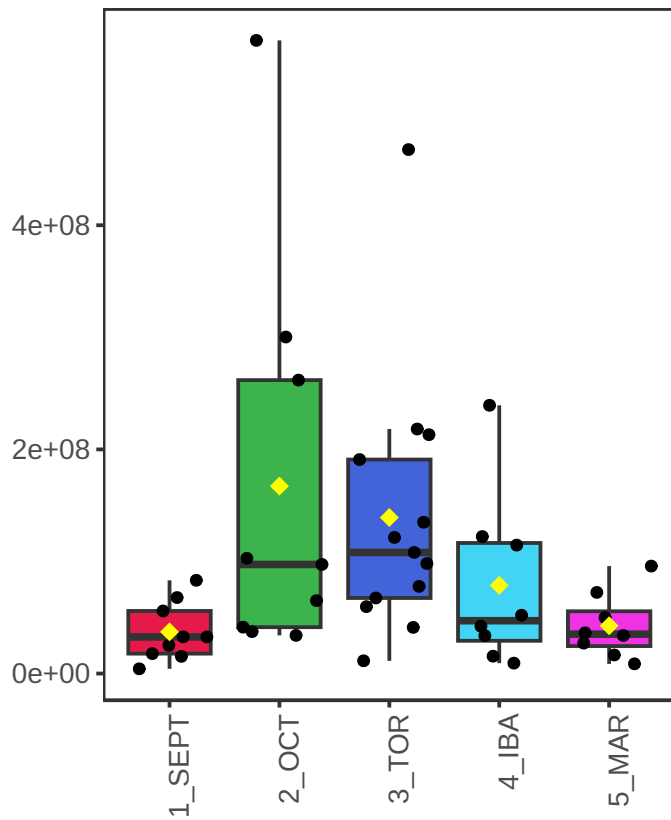

Normalized Conc.

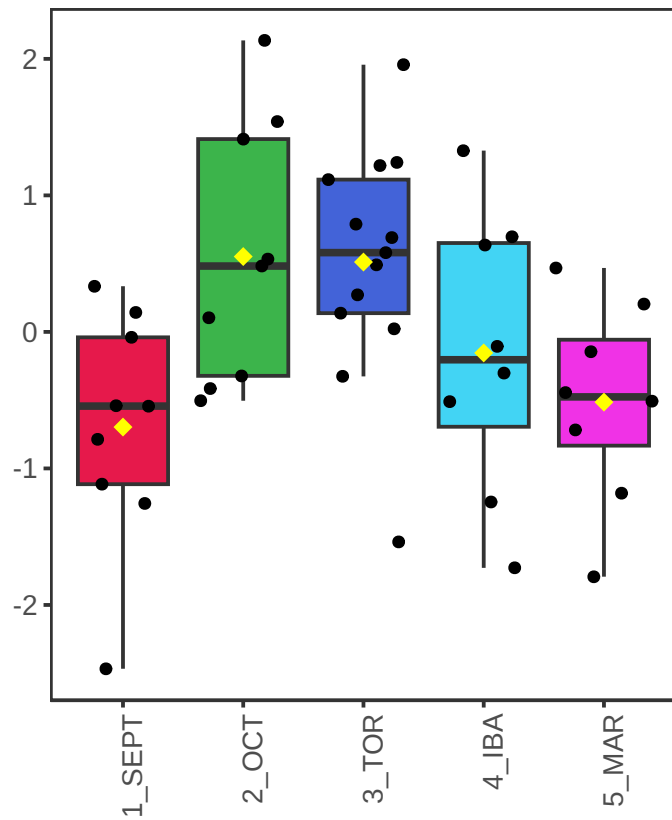

# Xanthine

Original Conc.

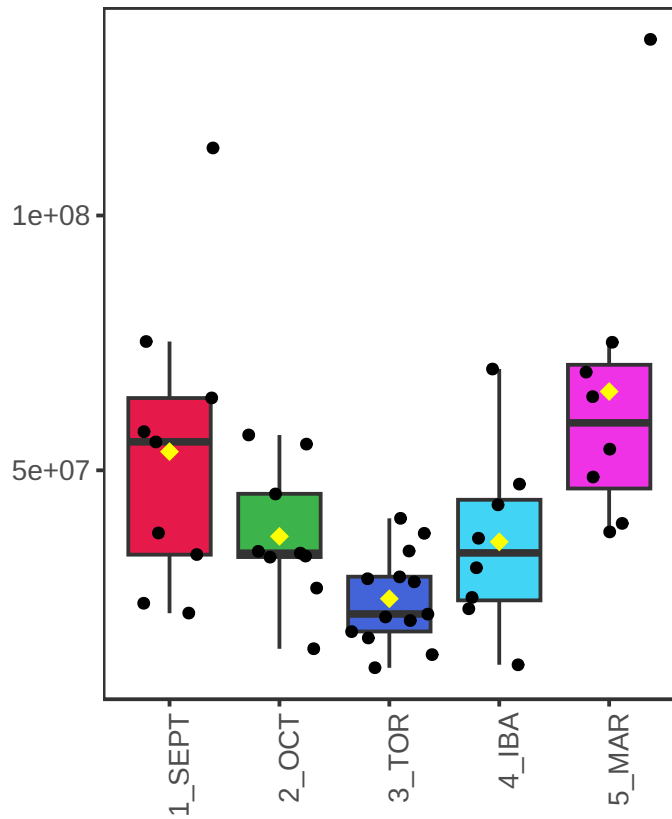

Normalized Conc.

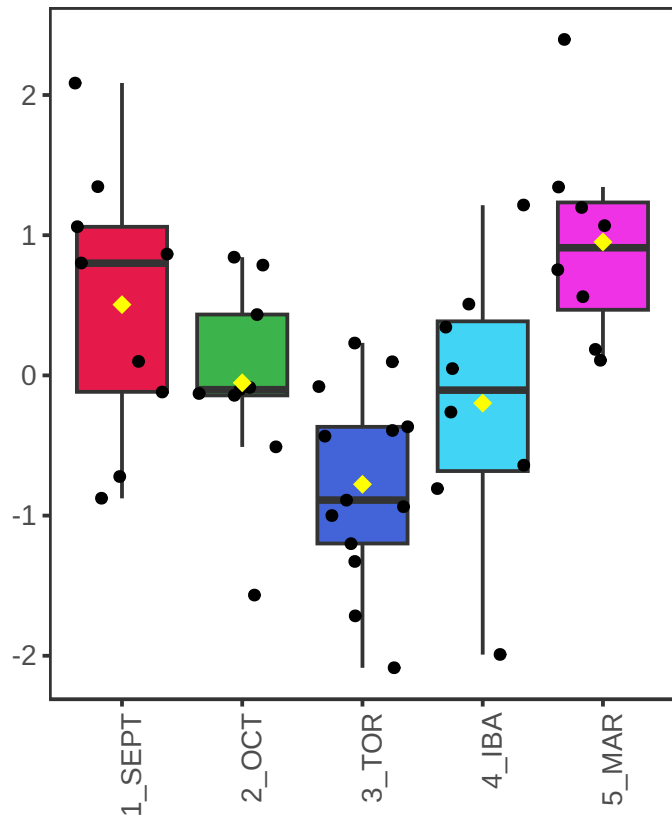

Supplement: Image3.pdf [file Image3.pdf]
